# Supplementary material for: Rosmarinic Acid Delays Tomato Fruit Ripening by Regulating Ripening-Associated Traits
Source: MDPI journal article supplement (doi:10.3390/antiox10111821), 2021-11-17
Supplement: s1 [file s1]

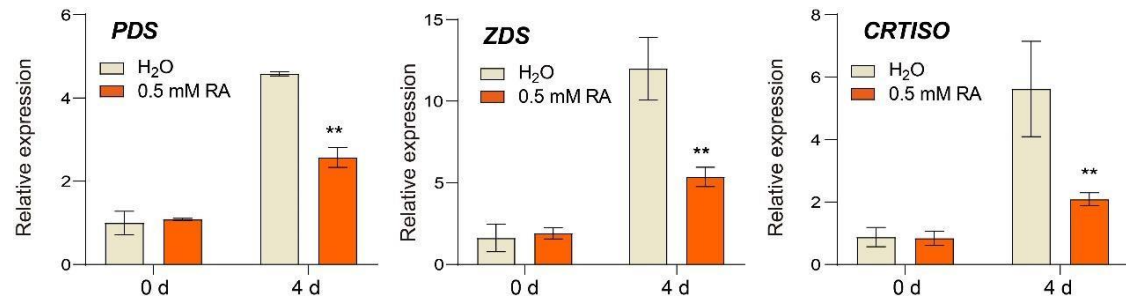

Figure S1. Effects of RA treatment on transcript abundance of genes involved in carotenoid biosynthesis. The transcript abundance of *Phytoene Desaturase* (*PDS*), *Zeta-Carotene Desaturase* (*ZDS*), and *Carotene Isomerase* (*CRTISO*) each gene under control treatment at 0 d was defined as 1. The fruit samples were collected at the indicated time points for and qRT-PCR analysis. The data are presented as mean values  $\pm$  SD;  $n = 3$ . Asterisks indicate statistically significant differences (\*\* $P \leq 0.01$ ) compared with control treatment under the same time point, as determined by Student's *t*-test
