# Supplementary material for: Rosmarinic Acid Delays Tomato Fruit Ripening by Regulating Ripening-Associated Traits
Source: Antioxidants (Basel). 2021 Nov 17;10(11):1821. doi: 10.3390/antiox10111821 (PMC8614985; doi:10.3390/antiox10111821)
Supplement: Supplementary file 1 [file antioxidants-10-01821-s001.zip › Supplemental__Table.xlsx]

## Sheet: Table S1
Table S1. Primer sequences used for qRT-PCR.
Accession number	Gene name	Forward primer (5’→3’)	Reverse primer (5’→3’)
Solyc07g049530	ACO1	ACAAACAGACGGGACACGAA	CTCTTTGGCTTGAAACTTGA
Solyc02g081190	ACO4	TGTCATATTTCCAGCACCAGAGT	GTTTCTATTGGACCTAAGTTGAC
Solyc01g095080	ACS2	GAAAGAGTTGTTATGGCTGGTG	GCTGGGTAGTATGGTGAAGGT
Solyc05g050010	ACS4	GCTCGGAGGTAGGATGGTTTC	GTTCCTCTTCCATTGTGCTTGT
Solyc03g123760	PDS	CATTGATTATCCAAGACCAGAG	CCAGCAATAACAATCTCCAA
Solyc01g097810	ZDS	TCTTGCTGGCTCATATACA	AGACTCAACTCATCAGATAGG
Solyc10g081650	CRTISO	ATGAAGCGAAGAAAGAGGTTGT	GCAAGGTATCGTCTGTGGGTCT
Solyc11g066390	Cu/Zn-SOD	GGCCAATCTTTGACCCTTTA	AGTCCAGGAGCAAGTCCAGT
Solyc12g094620	CAT	TGATCGCGAGAAGATACCTG	CTTCCACGTTCATGGACAAC
Solyc06g005160	APX	TCTGAATTGGGATTTGCTGA	CGTCTAACGTAGCTGCCAAA
Solyc09g091840	GR	TTGGTGGAACGTGTGTTCTT	TCTCATTCACTTCCCATCCA
Solyc03g078400	Actin	CCTCAGCACATTCCAGCAG	CCACCAAACTTCTCCATCCC

## Sheet: Table S2
Table S2. List and characteristics of the metabolites identified and quantified at 4 d and 8 d after soaking treatments with RA.
Name	m/z	rt(s)	SuperClass	Class	SubClass	Control-4d-1	Control-4d-2	Control-4d-3	RA-4d-1	RA-4d-2	RA-4d-3	Control-8d-1	Control-8d-2	Control-8d-3	RA-8d-1	RA-8d-2	RA-8d-3	QC-1	QC-2	QC-3
1,2-benzenedicarboxylic acid	149.023	48.0121	Benzenoids	Benzene and substituted derivatives	Benzoic acids and derivatives	9.08297e+06	8.87252e+06	8.37588e+06	7.88936e+06	7.77177e+06	8.10657e+06	7.572e+06	7.95108e+06	8.05494e+06	7.91009e+06	7.9124e+06	7.60887e+06	7.762e+06	7.76156e+06	7.88612e+06
1,2-di-(9z,12z,15z-octadecatrienoyl)-sn-glycero-3-phosphocholine	778.535	245.257	Lipids and lipid-like molecules	Glycerophospholipids	Glycerophosphocholines	5.44014e+06	5.81489e+06	5.73445e+06	5.68324e+06	6.09554e+06	5.56312e+06	5.07513e+06	5.43957e+06	4.36899e+06	5.36417e+06	6.44408e+06	4.90882e+06	5.65451e+06	5.77665e+06	5.78947e+06
1,2-diamino-2-methylpropane	72.0812	536.535	Organic nitrogen compounds	Organonitrogen compounds	Amines	3.90431e+08	4.12867e+08	3.75676e+08	4.57095e+08	4.49885e+08	4.43528e+08	3.01386e+08	3.81007e+08	3.20904e+08	4.03334e+08	4.49758e+08	4.50713e+08	4.34137e+08	4.37583e+08	4.44795e+08
1,2-dihexadecanoyl-sn-glycerol	551.502	56.9291	Lipids and lipid-like molecules	Glycerolipids	Diradylglycerols	8.17342e+06	8.08678e+06	8.92855e+06	8.57308e+06	5.11807e+06	6.75338e+06	7.10307e+06	1.00982e+07	8.686e+06	1.21689e+07	1.02778e+07	9.63904e+06	6.3791e+06	6.37671e+06	5.60764e+06
1,2-dilinoleoylglycerol	599.501	51.9736	Lipids and lipid-like molecules	Fatty Acyls	Lineolic acids and derivatives	1.34503e+07	1.2929e+07	1.25223e+07	1.26874e+07	9.27295e+06	1.13895e+07	9.31595e+06	1.09523e+07	8.70976e+06	1.09033e+07	9.87868e+06	1.13839e+07	1.06491e+07	1.07588e+07	1.06461e+07
1,2-dioleoyl-sn-glycero-3-phosphatidylcholine	786.597	241.672	Lipids and lipid-like molecules	Glycerophospholipids	Glycerophosphocholines	4.1023e+07	5.16373e+07	3.82548e+07	2.88724e+07	2.15135e+07	2.42564e+07	3.32082e+07	4.34508e+07	3.4083e+07	2.69381e+07	3.03559e+07	2.3038e+07	2.52082e+07	2.42224e+07	2.40905e+07
1,3,5-benzenetriol	127.039	903.107	Benzenoids	Phenols	Benzenetriols and derivatives	2.48258e+07	2.66096e+07	2.62847e+07	2.74613e+07	2.86798e+07	2.9286e+07	2.88156e+07	3.2577e+07	2.93998e+07	2.25465e+07	2.81544e+07	2.83163e+07	2.7985e+07	2.80622e+07	2.85595e+07
1,3-benzenediol, 5-methyl-2-[(1r,6r)-3-methyl-6-(1-methylethenyl)-2-cyclohexen-1-yl]-	135.116	236.566	Lipids and lipid-like molecules	Prenol lipids	Monoterpenoids	4.21683e+06	6.68665e+06	3.75167e+06	7.53412e+06	9.25119e+06	9.52446e+06	9.17179e+06	8.22975e+06	9.36067e+06	8.38004e+06	8.43028e+06	9.12484e+06	8.24192e+06	8.26506e+06	8.57616e+06
1,3-diaminopropane	75.1001	272.509	Organic nitrogen compounds	Organonitrogen compounds	Amines	4.63483e+08	4.67583e+08	1.47696e+08	5.08778e+08	7.50874e+08	5.02723e+08	4.49248e+08	2.40417e+08	2.50627e+08	4.57003e+08	4.51333e+08	4.46618e+08	4.75597e+08	4.94248e+08	4.75405e+08
1-(3-fluorobenzyl)-4-piperidinamine	209.153	367.784	Organoheterocyclic compounds	Piperidines	Benzylpiperidines	4.80799e+06	5.58575e+06	9.54386e+06	7.2796e+06	6.04316e+06	6.65655e+06	1.53795e+07	1.09214e+07	1.4945e+07	1.64763e+07	2.19609e+07	1.29512e+07	8.31838e+06	8.38567e+06	8.99947e+06
13-keto-9z,11e-octadecadienoic acid	295.226	123.398	Lipids and lipid-like molecules	Fatty Acyls	Lineolic acids and derivatives	1.77647e+06	1.78485e+06	1.69227e+06	1.66681e+06	1.64653e+06	1.54328e+06	1.39666e+06	1.37758e+06	1.44925e+06	1.84152e+06	1.64324e+06	1.44219e+06	1.86374e+06	2.58971e+06	1.88362e+06
1-(4-hydroxy-3,5-dimethoxyphenyl)ethanone	197.081	397.424	Organic oxygen compounds	Organooxygen compounds	Carbonyl compounds	297284	443749	311250	806512	613170	847140	562103	653628	472286	637718	1.02344e+06	1.01253e+06	768800	768974	812672
1,4-naphthoquinone	159.068	427.074	Benzenoids	Naphthalenes	Naphthoquinones	2.83606e+06	2.85785e+06	2.3155e+06	5.91174e+06	6.22243e+06	5.17879e+06	5.61045e+06	5.27743e+06	5.96483e+06	1.58868e+06	4.17905e+06	6.33623e+06	5.88079e+06	6.27138e+06	8.10172e+06
1,4-piperazinediethanesulfonic acid	303.089	565.66	Organoheterocyclic compounds	Diazinanes	Piperazines	1.51666e+06	1.61419e+06	1.57345e+06	1.87137e+06	1.24773e+06	1.53426e+06	2.09901e+06	2.5443e+06	1.99827e+06	3.1961e+06	3.55661e+06	3.53719e+06	1.75379e+06	1.72314e+06	1.75376e+06
15-deoxy-goyazensolide	284.33	255.063	Organoheterocyclic compounds	Lactones	Gamma butyrolactones	2.3867e+06	2.54538e+06	2.29937e+06	2.3579e+06	1.22993e+06	1.51114e+06	3.38515e+06	2.14097e+06	2.09389e+06	2.23533e+07	1.57746e+07	1.24176e+07	4.16394e+06	4.33344e+06	4.16394e+06
1,5-diaminonaphthalene	159.091	340.313				2.66527e+07	2.66065e+07	2.79778e+07	2.60202e+07	2.7851e+07	2.70107e+07	2.79568e+07	2.67142e+07	2.76096e+07	2.4401e+07	2.66927e+07	2.74369e+07	2.65322e+07	2.65486e+07	2.7696e+07
1,5-pentanediamine	103.131	234.452	Organic nitrogen compounds	Organonitrogen compounds	Amines	9.64104e+06	7.23022e+06	8.0539e+06	8.0012e+06	7.32425e+06	7.70324e+06	6.7143e+06	6.62077e+06	7.05652e+06	6.46335e+06	9.24654e+06	8.67096e+06	1.00388e+07	8.9257e+06	9.10579e+06
1,6-anhydro-2,3-o-isopropylidene-.beta.-d-mannopyranose	127.039	448.706				3.09204e+08	5.73185e+08	4.94953e+08	4.77012e+08	4.692e+08	5.51274e+08	4.70893e+08	5.89549e+08	4.77754e+08	4.12782e+08	4.89912e+08	3.93779e+08	5.00808e+08	5.04195e+08	5.69346e+08
1,6-anhydro-.beta.-d-glucose	145.049	448.087				9.32982e+08	8.66278e+08	8.62079e+08	7.85105e+08	8.02275e+08	7.86326e+08	1.07218e+09	1.56363e+09	1.23822e+09	7.44105e+08	1.20246e+09	9.911e+08	1.50219e+09	1.1998e+09	1.49079e+09
16-Hydroxypalmitic acid	295.226	204.494	Lipids and lipid-like molecules	Fatty Acyls	Fatty acids and conjugates	9.01582e+06	9.26191e+06	5.06622e+06	1.68729e+07	1.50833e+07	2.18648e+07	1.08715e+07	1.09386e+07	9.11209e+06	1.37085e+07	1.45211e+07	1.45299e+07	1.57169e+07	1.58232e+07	1.64813e+07
1-acetyl-3-piperidinamine	126.091	633.618	Organoheterocyclic compounds	Piperidines	N-acylpiperidines	3.86338e+06	3.87127e+06	3.65962e+06	3.41281e+06	3.22513e+06	3.56319e+06	3.83418e+06	3.81176e+06	3.9144e+06	4.19982e+06	3.84768e+06	3.84913e+06	4.10775e+06	4.12139e+06	4.36952e+06
1-acetylimidazole	111.055	700.874	Organoheterocyclic compounds	Azoles	Imidazoles	9.16053e+06	1.07277e+07	9.75133e+06	1.10254e+07	1.34813e+07	1.53431e+07	1.29785e+07	1.29492e+07	1.19143e+07	7.91873e+06	1.30678e+07	1.26791e+07	1.21091e+07	1.2567e+07	1.25442e+07
1-amino-1-cyclopentanecarboxylate	130.122	1010.71	Organic acids and derivatives	Carboxylic acids and derivatives	Amino acids, peptides, and analogues	5.43856e+06	4.98179e+06	5.382e+06	5.20765e+06	4.53044e+06	5.04406e+06	5.0763e+06	6.84136e+06	5.37791e+06	4.89987e+06	5.22445e+06	6.51033e+06	5.13797e+06	5.24593e+06	5.35576e+06
1-deoxynojirimycin	164.07	117.806	Organoheterocyclic compounds	Piperidines		6.60707e+06	5.37641e+06	5.06692e+06	8.63352e+06	2.25757e+06	4.99099e+06	5.98776e+06	8.66342e+06	5.68503e+06	6.24475e+06	9.46582e+06	8.784e+06	5.3774e+06	5.40651e+06	5.65594e+06
1h-1,2,3-triazole-5-oh	86.0321	434.763	Organoheterocyclic compounds	Azoles	Triazoles	1.86237e+07	2.26019e+07	1.78154e+07	2.44338e+07	2.39869e+07	2.5024e+07	2.59817e+07	2.18636e+07	2.57529e+07	1.46906e+07	2.29628e+07	2.60724e+07	2.50368e+07	2.65539e+07	2.6487e+07
1h-1,2,4-triazol-3-amine	85.0287	449.125	Organoheterocyclic compounds	Azoles	Triazoles	9.40979e+08	9.24816e+08	1.21466e+09	8.18799e+08	8.2758e+08	9.13472e+08	8.15049e+08	1.44198e+09	1.37579e+09	7.08969e+08	6.39157e+08	9.15052e+08	8.88623e+08	8.9545e+08	1.41394e+09
1h-benzofuro[2,3-c]azepin-1-one, 2,3,4,5-tetrahydro-7-hydroxy-	218.065	764.292				2.43136e+07	2.61917e+07	2.39603e+07	2.91011e+07	2.80194e+07	2.98657e+07	2.78566e+07	2.95893e+07	2.97761e+07	2.68339e+07	2.88595e+07	2.87261e+07	2.83395e+07	2.84903e+07	2.94551e+07
1-hexadecanoyl-2-octadecadienoyl-sn-glycero-3-phosphocholine	758.567	212.826	Lipids and lipid-like molecules	Glycerophospholipids	Glycerophosphocholines	5.67577e+06	2.17195e+07	1.43718e+07	4.88478e+06	2.16669e+07	1.97787e+07	5.24778e+06	6.13562e+06	1.75922e+07	2.49498e+07	5.09651e+06	1.70042e+07	2.68728e+07	3.29451e+07	2.69103e+07
1-hexadecylamine	242.283	248.987	Organic nitrogen compounds	Organonitrogen compounds	Amines	5.55355e+06	5.85646e+06	5.8062e+06	4.04637e+06	1.77021e+06	2.81077e+06	6.28765e+06	5.99895e+06	5.9763e+06	6.61389e+06	4.44161e+06	4.64382e+06	3.77908e+06	3.76987e+06	3.69872e+06
1-methyladenosine	282.119	498.907	"Nucleosides, nucleotides, and analogues"	Purine nucleosides		1.76541e+08	1.89544e+08	1.74813e+08	1.70451e+08	1.5511e+08	1.73454e+08	2.00707e+08	2.34644e+08	1.98298e+08	1.81168e+08	1.93924e+08	1.9871e+08	1.94673e+08	1.99787e+08	1.99615e+08
1-methyl-l-histidine	124.087	141.194	Organic acids and derivatives	Carboxylic acids and derivatives	Amino acids, peptides, and analogues	9.04069e+06	6.31714e+06	7.24674e+06	6.4194e+06	6.93908e+06	6.4095e+06	6.90397e+06	7.54324e+06	4.58128e+06	8.99783e+06	6.23378e+06	8.54076e+06	8.42671e+06	7.83308e+06	8.4133e+06
1-monolinoleoyl-rac-glycerol	355.283	53.8867	Lipids and lipid-like molecules	Fatty Acyls	Lineolic acids and derivatives	1.59072e+06	2.01625e+06	2.46605e+06	2.09892e+06	2.62458e+06	2.78645e+06	1.86268e+06	1.84038e+06	2.44525e+06	2.25476e+06	1.94612e+06	2.313e+06	2.13562e+06	2.20253e+06	2.20229e+06
1-naphthalenamine	144.08	340.379				4.38616e+09	4.59083e+09	4.48174e+09	3.96154e+09	4.05245e+09	4.14447e+09	4.6644e+09	5.1757e+09	4.85988e+09	3.78791e+09	4.68449e+09	4.79261e+09	4.56176e+09	4.56641e+09	4.68881e+09
1-naphthalenesulfonic acid, 8-(phenylamino)-	282.048	418.761	Benzenoids	Naphthalenes	Naphthalene sulfonic acids and derivatives	4.22767e+07	4.11927e+07	4.18594e+07	4.42908e+07	2.65612e+07	3.50628e+07	4.27088e+07	2.71299e+07	4.16522e+07	3.8932e+07	4.05391e+07	4.51253e+07	2.61755e+07	2.61119e+07	2.12096e+07
1-naphthoic acid	173.07	80.6809	Benzenoids	Naphthalenes	Naphthalenecarboxylic acids and derivatives	1.10625e+08	1.12605e+08	1.20453e+08	8.84944e+07	1.0222e+08	1.0516e+08	1.83438e+08	2.02693e+08	1.90388e+08	1.45506e+08	1.41669e+08	1.50044e+08	1.32247e+08	1.4256e+08	1.42509e+08
1-palmitoyl-2-linoleoyl-rac-glycerol	337.272	51.4528	Lipids and lipid-like molecules	Fatty Acyls	Lineolic acids and derivatives	3.03814e+07	1.80783e+07	1.70602e+07	1.76342e+07	2.86217e+07	2.54404e+07	3.23729e+07	1.2596e+07	3.42424e+07	1.46007e+07	1.60329e+07	1.54291e+07	3.19228e+07	3.19226e+07	3.34063e+07
1-palmitoyl-2-linoleoyl-sn-glycero-3-phosphocholine	758.566	58.4942	Lipids and lipid-like molecules	Glycerophospholipids	Glycerophosphocholines	2.05345e+08	2.32476e+08	2.02794e+08	1.59938e+08	1.55394e+08	1.7033e+08	2.01886e+08	2.22996e+08	1.6532e+08	1.70665e+08	1.90266e+08	1.59388e+08	1.79433e+08	1.8349e+08	1.79436e+08
1-palmitoyl-2-oleoyl-sn-glycero-3-phosphoethanolamine	740.52	249.18	Lipids and lipid-like molecules	Glycerophospholipids	Glycerophosphoethanolamines	4.92618e+07	4.88188e+07	4.66522e+07	4.7565e+07	3.35927e+07	3.55781e+07	3.46367e+07	4.10282e+07	3.28607e+07	3.88898e+07	4.18502e+07	3.55912e+07	3.43879e+07	3.44195e+07	3.32236e+07
1-Palmitoylglycerol	313.273	272.521				3.62534e+07	3.37083e+07	2.83147e+07	2.34438e+07	1.63078e+07	1.84354e+07	2.93985e+07	3.19262e+07	3.02576e+07	2.84064e+07	2.28182e+07	2.23757e+07	2.5981e+07	2.36452e+07	2.35626e+07
1-palmitoyl-sn-glycero-3-phosphocholine	496.338	341.387	Lipids and lipid-like molecules	Glycerophospholipids	Glycerophosphocholines	5.95756e+07	6.59236e+07	5.87483e+07	6.0208e+07	4.75618e+07	4.73929e+07	5.97061e+07	6.21154e+07	5.99353e+07	8.14382e+07	8.26899e+07	6.71899e+07	5.74824e+07	5.87849e+07	5.879e+07
1-penten-3-one, 1-(4-fluorophenyl)-2-methyl-, oxime, (1e,3e)-	190.086	421.522	Benzenoids	Benzene and substituted derivatives	Halobenzenes	4.98477e+06	5.17858e+06	5.07365e+06	4.54441e+06	5.29253e+06	4.88266e+06	4.96066e+06	4.11351e+06	5.51257e+06	3.77183e+06	4.78442e+06	4.53079e+06	5.17003e+06	5.42484e+06	6.43674e+06
1-phenyl-2-decanoylamino-3-morpholino-1-propanol	304.247	564.488	Organic nitrogen compounds	Organonitrogen compounds	Amines	1.33236e+06	1.47692e+06	1.45144e+06	1.41595e+06	1.06047e+06	1.18714e+06	1.25071e+06	1.41947e+06	1.22718e+06	2.00214e+06	1.69928e+06	1.70743e+06	1.18106e+06	1.18303e+06	1.19292e+06
(1r,5s)-8-methyl-8-azabicyclo[3.2.1]octan-3-amine	141.138	375.27				7.15256e+06	7.3043e+06	7.28517e+06	7.3096e+06	7.07904e+06	7.85261e+06	7.34062e+06	7.99332e+06	7.31564e+06	9.42736e+06	8.71489e+06	8.87261e+06	6.84235e+06	7.00231e+06	6.99734e+06
1-stearoyl-2-linoleoyl-sn-glycero-3-phosphocholine	786.598	58.5461	Lipids and lipid-like molecules	Glycerophospholipids	Glycerophosphocholines	2.44664e+07	2.76932e+07	2.37303e+07	1.66e+07	1.27462e+07	1.77873e+07	2.0269e+07	2.38865e+07	1.67764e+07	1.55743e+07	1.85561e+07	1.5632e+07	1.44131e+07	1.5256e+07	1.43641e+07
1-stearoyl-2-linoleoyl-sn-glycerol	603.532	336.649	Lipids and lipid-like molecules	Fatty Acyls	Lineolic acids and derivatives	9.40267e+06	1.05042e+07	1.06935e+07	1.97151e+07	4.18664e+06	5.45055e+06	9.67177e+06	7.93368e+06	7.19151e+06	1.51989e+07	8.16701e+06	8.84144e+06	8.27348e+06	8.54824e+06	6.4154e+06
1-stearoyl-rac-glycerol	341.304	52.4156	Lipids and lipid-like molecules	Glycerolipids	Monoradylglycerols	7.2423e+06	6.55369e+06	9.17501e+06	8.33723e+06	7.7518e+06	8.10089e+06	8.81364e+06	9.30933e+06	1.09756e+07	9.80702e+06	8.8688e+06	8.85028e+06	7.24244e+06	7.6525e+06	7.64123e+06
1-Stearoyl-sn-glycerol 3-phosphocholine(LPC(18:0))	524.37	334.512	Lipids and lipid-like molecules	Glycerophospholipids	Glycerophosphocholines	7.52239e+06	7.99711e+06	6.59289e+06	8.50812e+06	5.36076e+06	5.81881e+06	6.74009e+06	7.05149e+06	6.6046e+06	7.8462e+06	9.24273e+06	6.77496e+06	6.90925e+06	7.01502e+06	7.01516e+06
21-deoxycortisol	311.221	82.7369	Lipids and lipid-like molecules	Steroids and steroid derivatives	Pregnane steroids	4.6604e+06	4.63848e+06	4.48752e+06	3.64378e+06	2.95844e+06	2.72736e+06	6.51863e+06	5.03053e+06	5.45308e+06	4.38288e+06	3.66814e+06	4.95841e+06	4.41171e+06	4.59541e+06	4.41173e+06
2(1h)-pyridinone, 3-[(2s,4s,5r)-5,6-dichloro-2,4-dimethyl-1-oxohexyl]-4-hydroxy-5,6-dimethoxy-	366.063	729.028	Organic oxygen compounds	Organooxygen compounds	Carbonyl compounds	8.15767e+06	7.96108e+06	8.32958e+06	9.70019e+06	2.51105e+07	2.48239e+07	1.5444e+07	1.65986e+07	1.15983e+07	6.24289e+06	1.46226e+07	1.7221e+07	1.63467e+07	1.64391e+07	1.73215e+07
2,2-bis[hydroxymethyl]-2,2',2''-nitrilotriethanol	210.133	270.377	Organic nitrogen compounds	Organonitrogen compounds	Amines	1.49515e+06	915870	1.77801e+06	3.29378e+06	3.81822e+06	800743	3.46613e+07	3.8787e+07	3.56527e+07	718734	1.58223e+06	973030	1.90591e+07	2.10444e+07	2.09967e+07
2,3-diethylpyrazine	137.096	362.703	Organoheterocyclic compounds	Diazines	Pyrazines	2.60582e+06	2.53516e+06	2.63317e+06	3.7214e+06	3.1125e+06	3.4999e+06	3.48445e+06	3.56677e+06	3.54023e+06	3.42417e+06	5.20122e+06	4.67367e+06	3.71004e+06	3.89173e+06	3.88394e+06
2',3'-dimethoxy-3-hydroxyflavone	299.073	255.228	Phenylpropanoids and polyketides	Flavonoids	Flavones	2.91997e+07	2.97466e+07	3.43244e+07	2.79132e+07	3.18917e+07	3.1563e+07	3.83303e+07	4.66566e+07	3.94241e+07	2.43608e+07	2.67253e+07	2.94487e+07	3.10328e+07	3.16904e+07	3.1699e+07
2,4,5-trimethylaniline	121.102	384.557	Benzenoids	Benzene and substituted derivatives	Aniline and substituted anilines	4.24993e+06	5.52799e+06	4.9802e+06	7.08008e+06	6.25015e+06	8.18295e+06	7.79677e+06	7.34537e+06	6.68104e+06	7.94893e+06	7.47387e+06	6.94905e+06	7.82423e+06	7.84867e+06	8.84868e+06
2,4,6-tri-tert-butylaniline	246.242	109.741	Benzenoids	Benzene and substituted derivatives	Phenylpropanes	1.50413e+07	1.59873e+07	1.23995e+07	1.23845e+07	1.2593e+07	8.98325e+06	1.80685e+07	1.5263e+07	1.07538e+07	1.14609e+07	1.16354e+07	1.10258e+07	9.79781e+06	9.82493e+06	1.00971e+07
2,4-dimethylmethcathinone	192.159	94.6544	Organic oxygen compounds	Organooxygen compounds	Carbonyl compounds	4.63079e+06	6.38804e+06	5.96518e+06	5.73571e+06	4.34891e+06	4.5892e+06	5.58093e+06	5.5625e+06	4.33277e+06	4.4374e+06	4.15351e+06	3.85966e+06	5.85096e+06	5.54974e+06	5.83613e+06
2-(4-pyridyl)-4-methylthiazole-5-carboxylic acid	221.018	708.303	Organoheterocyclic compounds	Azoles	Thiazoles	5.84963e+06	6.263e+06	6.24805e+06	6.28086e+06	5.63637e+06	6.0107e+06	4.53721e+06	5.05976e+06	4.39813e+06	5.38266e+06	4.74415e+06	4.71383e+06	5.08209e+06	5.21968e+06	5.2132e+06
2',5-dichloro-2-hydroxybenzophenone	155.01	428.781	Benzenoids	Benzene and substituted derivatives	Benzophenones	3.05066e+06	2.91971e+06	2.75768e+06	2.81016e+06	2.277e+06	306053	2.71799e+06	2.53741e+06	2.98354e+06	2.07779e+06	3.0401e+06	2.88987e+06	2.74774e+06	2.63708e+06	2.74936e+06
2,6-diaminopimelic acid	128.07	973.014	Organic acids and derivatives	Carboxylic acids and derivatives	Amino acids, peptides, and analogues	8.3299e+06	1.16707e+07	1.74763e+07	1.07037e+07	1.59036e+07	1.05783e+07	1.49728e+07	1.43667e+07	1.8432e+07	1.44362e+07	2.08387e+07	9.8726e+06	1.85052e+07	1.85131e+07	1.75482e+07
2-acetylamino-3-mercapto-3-methylbutyric acid	192.05	197.397	Organic acids and derivatives	Carboxylic acids and derivatives	Amino acids, peptides, and analogues	4.69516e+08	4.7341e+08	5.44247e+08	3.24478e+08	3.81933e+08	3.87697e+08	4.94544e+08	4.26132e+08	3.74499e+08	3.46131e+08	3.11504e+08	3.0235e+08	3.87975e+08	4.0822e+08	4.07925e+08
2-adamantanone	151.111	368.916	Organic oxygen compounds	Organooxygen compounds	Carbonyl compounds	3.13477e+06	1.7321e+06	2.63039e+06	2.1861e+06	1.83737e+06	2.27965e+06	2.15018e+06	2.89696e+06	3.33107e+06	2.50862e+06	2.77958e+06	2.7817e+06	2.30189e+06	2.46374e+06	2.45652e+06
2-amino-1-phenylbutane	133.101	51.7289	Benzenoids	Benzene and substituted derivatives	Phenethylamines	1.75345e+07	1.73652e+07	5.13324e+06	9.448e+06	1.43798e+07	6.60653e+06	2.01435e+07	2.31007e+07	5.63331e+06	1.60929e+07	1.78078e+07	1.83795e+07	1.63917e+07	1.68784e+07	1.6833e+07
2-amino-1-phenylethanol	120.081	454.555	Organic nitrogen compounds	Organonitrogen compounds	Amines	3.94865e+09	4.13129e+09	3.9173e+09	4.08287e+09	4.12436e+09	4.18278e+09	3.01438e+09	3.8145e+09	3.17608e+09	3.1506e+09	4.11404e+09	4.08468e+09	3.96776e+09	4.02048e+09	4.13376e+09
2-aminoacetophenone	136.075	117.81	Organic oxygen compounds	Organooxygen compounds	Carbonyl compounds	1.26903e+07	1.16795e+07	1.26768e+07	2.00345e+07	4.86911e+06	1.25461e+07	1.27227e+07	1.38611e+07	1.29538e+07	1.62189e+07	1.54491e+07	1.3958e+07	1.36144e+07	1.38258e+07	1.50151e+07
2-aminoadipic acid	162.076	767.375	Organic acids and derivatives	Carboxylic acids and derivatives	Amino acids, peptides, and analogues	1.19496e+07	1.18217e+07	1.16761e+07	9.84789e+06	1.0566e+07	9.82978e+06	1.50417e+07	1.68528e+07	1.53557e+07	1.28319e+07	1.37248e+07	1.3685e+07	1.29206e+07	1.29322e+07	1.37154e+07
2-aminophenol	110.06	83.5505	Benzenoids	Benzene and substituted derivatives	Aniline and substituted anilines	1.35122e+07	1.4107e+07	1.34995e+07	1.78224e+07	1.74424e+07	1.78329e+07	1.90309e+07	2.16105e+07	1.86008e+07	1.46296e+07	1.8894e+07	1.87652e+07	1.74825e+07	1.76467e+07	1.78681e+07
2-butanol, 1-[(2,3-dihydro-7-methyl-1h-inden-4-yl)oxy]-3-[(1-methylethyl)amino]-, (2r,3r)-rel-	201.127	176.736				6.67808e+06	8.00178e+06	1.28581e+07	5.4807e+06	6.2409e+06	6.18311e+06	8.82731e+06	1.22089e+07	8.91256e+06	8.16464e+06	7.47949e+06	7.59981e+06	6.57853e+06	6.76367e+06	6.76523e+06
2-buten-1-ol	73.0653	318.992	Organic oxygen compounds	Organooxygen compounds	Alcohols and polyols	3.72164e+06	4.52936e+06	4.2347e+06	5.26101e+06	5.85703e+06	5.51925e+06	7.70544e+06	8.01132e+06	7.11646e+06	1.0412e+07	1.21473e+07	1.19588e+07	8.57867e+06	8.79116e+06	8.79332e+06
2-deoxy-d-ribose	117.066	660.439	Organic oxygen compounds	Organooxygen compounds	Carbonyl compounds	3.79167e+06	4.1903e+06	4.05055e+06	3.22791e+06	2.64824e+06	2.88408e+06	4.7124e+06	4.55848e+06	4.51393e+06	4.87484e+06	3.60234e+06	3.89053e+06	3.14822e+06	3.04589e+06	3.04422e+06
(2e,4e)-hexa-2,4-dienoic acid	113.071	199.788	Lipids and lipid-like molecules	Fatty Acyls	Fatty acids and conjugates	8.56478e+06	8.30287e+06	7.44457e+06	7.63404e+06	1.12859e+07	9.28037e+06	1.27267e+07	1.5005e+07	1.06704e+07	7.82331e+06	1.15056e+07	1.00364e+07	1.19141e+07	1.19859e+07	1.26521e+07
(2e)-n-(4-acetamidobutyl)-3-(4-hydroxy-3-methoxyphenyl)prop-2-enamide	307.175	433.282	Phenylpropanoids and polyketides	Cinnamic acids and derivatives	Hydroxycinnamic acids and derivatives	1.23801e+08	1.26636e+08	8.23621e+07	1.21258e+08	9.26768e+07	1.34255e+08	9.18881e+07	1.27344e+08	1.09917e+08	1.33716e+08	1.13949e+08	1.1518e+08	1.21733e+08	1.22101e+08	1.26086e+08
2-fluoromethcathinone	182.081	122.025	Organic oxygen compounds	Organooxygen compounds	Carbonyl compounds	9.81274e+06	1.05505e+07	8.54826e+06	1.42373e+07	1.20766e+07	8.63459e+06	1.51227e+07	1.69787e+07	1.47457e+07	1.59499e+07	1.84601e+07	2.23585e+07	1.42037e+07	1.42776e+07	1.50319e+07
2'-fucosyllactose	511.178	381.989	Organic oxygen compounds	Organooxygen compounds	Carbohydrates and carbohydrate conjugates	6.70545e+06	5.6639e+06	5.5034e+06	7.1201e+06	6.94937e+06	8.25401e+06	1.04073e+07	1.26017e+07	9.67681e+06	6.32911e+06	7.94014e+06	9.085e+06	9.06848e+06	9.28641e+06	9.30569e+06
2-furancarboxylic acid	113	428.745	Organoheterocyclic compounds	Furans	Furoic acid and derivatives	1.23852e+06	1.18948e+06	1.1095e+06	1.03171e+06	6.30391e+06	3.85336e+06	1.26954e+06	1.22414e+06	1.32004e+06	750077	1.34204e+06	1.27324e+06	2.93121e+06	2.24475e+06	2.93899e+06
2-heptyl-4-hydroxyquinoline n-oxide	159.091	216.797	Organoheterocyclic compounds	Quinolines and derivatives	4-hydroxy-2-alkylquinolines	1.19724e+07	1.64862e+07	1.46312e+07	1.32048e+07	1.35939e+07	1.28262e+07	1.59162e+07	1.45245e+07	1.47377e+07	1.06574e+07	1.58707e+07	1.6189e+07	1.59539e+07	1.59553e+07	1.68591e+07
2-hexenal	99.0918	442.142	Organic oxygen compounds	Organooxygen compounds	Carbonyl compounds	3.08792e+06	2.94377e+06	2.57441e+06	2.94811e+06	4.47308e+06	4.71627e+06	2.89205e+06	3.82789e+06	3.48217e+06	2.55346e+06	3.85251e+06	3.64356e+06	3.24306e+06	3.24301e+06	3.28478e+06
2-hydroxy-6-methylquinoline-3-carbaldehyde	170.044	737.788	Organoheterocyclic compounds	Quinolines and derivatives	Quinolones and derivatives	1.08611e+07	2.68838e+07	1.0148e+07	2.3749e+07	8.70183e+06	9.40846e+06	2.41388e+07	2.66734e+07	2.98397e+07	1.38659e+07	1.79102e+07	3.22936e+07	1.7234e+07	1.75699e+07	1.7896e+07
2-Hydroxyadenine	152.054	505.604	Organoheterocyclic compounds	Imidazopyrimidines	Purines and purine derivatives	665626	1.0855e+06	924865	365572	493300	330966	1.29424e+06	8.85728e+06	901584	554514	560396	631545	1.55567e+06	2.49184e+06	1.44561e+06
2-hydroxybenzyl alcohol	107.033	114.02	Benzenoids	Benzene and substituted derivatives	Benzyl alcohols	570475	429339	500944	453491	635304	581260	625363	449694	622232	531670	569792	671428	631787	642699	679956
2-keto-l-gulonic acid	212.091	376.014	Organic oxygen compounds	Organooxygen compounds	Carbohydrates and carbohydrate conjugates	1.81494e+06	1.93241e+06	1.86618e+06	1.67637e+06	1.68421e+06	1.92148e+06	1.7768e+06	2.16475e+06	1.7249e+06	1.86522e+06	3.15081e+06	2.30005e+06	1.85304e+06	1.93906e+06	1.93924e+06
2-linoleoylglycerol	337.272	440.343	Lipids and lipid-like molecules	Fatty Acyls	Lineolic acids and derivatives	2.12765e+07	2.38282e+07	1.81728e+07	1.78487e+07	1.99975e+07	1.47334e+07	2.14489e+07	2.0327e+07	1.92264e+07	1.76881e+07	2.13768e+07	2.15684e+07	2.21554e+07	2.21929e+07	2.30062e+07
2-methoxy-3,5-dimethyl-6-[(4z)-4-[(e)-2-methyl-3-(4-nitrophenyl)prop-2-enylidene]oxolan-2-yl]pyran-4-one	420.125	649.957	Benzenoids	Benzene and substituted derivatives	Nitrobenzenes	7.7774e+06	8.05704e+06	7.67823e+06	6.55775e+06	4.30243e+06	3.45164e+06	8.25761e+06	8.93227e+06	8.67597e+06	9.53868e+06	7.76728e+06	7.81251e+06	8.42152e+06	8.61531e+06	8.9584e+06
2-methoxy-5-nitrophenol	170.056	654.176	Benzenoids	Benzene and substituted derivatives	Nitrobenzenes	3.74923e+06	4.34112e+06	3.87271e+06	8.58907e+06	2.20042e+06	3.81368e+06	3.07759e+06	3.5317e+06	3.23737e+06	5.65294e+06	6.39484e+06	6.13409e+06	3.24371e+06	3.25917e+06	3.42886e+06
2-Methyl-3-hydroxybutyric acid	118.061	133.364	Lipids and lipid-like molecules	Fatty Acyls	Fatty acids and conjugates	585161	357250	629709	877611	175600	293926	318269	334969	315618	703935	520276	940558	342004	352655	352591
2-(methylamino)-1-(2-naphthalenyl)-1-pentanone	224.143	85.4014	Benzenoids	Benzene and substituted derivatives	Butyrophenones	1.9656e+06	2.23313e+06	1.87017e+06	1.47442e+06	1.21276e+06	2.6293e+06	3.22988e+06	3.59788e+06	3.24034e+06	2.48578e+06	1.29259e+06	1.42915e+06	2.0118e+06	2.08401e+06	2.08086e+06
2-methylamino-1-(3,4-methylenedioxyphenyl)propan-1-one	160.075	216.858				3.51887e+08	3.77745e+08	3.09907e+08	3.80721e+08	3.10119e+08	3.80245e+08	3.71484e+08	3.63277e+08	3.8105e+08	2.94849e+08	3.60997e+08	3.61434e+08	3.65674e+08	3.69351e+08	3.79971e+08
2-methylbenzamide oxime	151.086	137.693	Benzenoids	Benzene and substituted derivatives	Toluenes	2.89736e+06	2.8287e+06	3.75459e+06	2.12375e+06	5.48075e+06	4.72099e+06	3.50453e+06	4.40214e+06	4.17041e+06	2.80468e+06	4.11625e+06	3.53125e+06	4.04392e+06	4.04511e+06	4.08554e+06
2-methylhippuric acid	119.049	229.928	Benzenoids	Benzene and substituted derivatives	Benzoic acids and derivatives	9.40923e+07	1.038e+08	1.00586e+08	1.05462e+08	9.91767e+07	8.82267e+07	1.01805e+08	1.12106e+08	9.73946e+07	8.71314e+07	9.83984e+07	9.82179e+07	9.6248e+07	9.88143e+07	9.62401e+07
2-methylpyrrolidine	86.0967	488.067				4.67316e+08	4.68074e+08	4.23797e+08	5.01901e+08	5.11455e+08	5.24126e+08	3.48719e+08	3.96881e+08	3.45766e+08	4.28518e+08	4.75454e+08	4.86445e+08	4.9039e+08	4.91583e+08	5.07077e+08
2-naphthalenol, 1-[(2,4-dimethylphenyl)azo]-	156.042	566.588	Benzenoids	Naphthalenes	Naphthols and derivatives	1.05243e+07	1.06186e+07	1.03772e+07	1.15086e+07	1.02057e+07	1.08208e+07	1.00672e+07	1.12553e+07	1.04935e+07	1.03101e+07	1.08797e+07	1.01086e+07	1.02577e+07	1.05611e+07	1.05583e+07
2'-o-methyladenosine	282.119	164.945	"Nucleosides, nucleotides, and analogues"	Purine nucleosides		7.46301e+06	7.91842e+06	7.01499e+06	8.52086e+06	9.09268e+06	8.38446e+06	8.72283e+06	8.44573e+06	6.08487e+06	7.75534e+06	8.37271e+06	8.81097e+06	8.80597e+06	8.48344e+06	8.82014e+06
2'-O-methylcytidine	515.208	288.962				2.78734e+06	2.5414e+06	2.76645e+06	3.12714e+06	2.35362e+06	1.96565e+06	5.7714e+06	7.05841e+06	5.85347e+06	4.14579e+06	5.4822e+06	5.44214e+06	5.24013e+06	5.68881e+06	5.67122e+06
2-pentanone, 5-[3-(1-naphthalenylcarbonyl)-1h-indol-1-yl]-	155.042	755.485	Organoheterocyclic compounds	Indoles and derivatives	Naphthoylindoles	2.78769e+06	3.96739e+06	2.65853e+06	2.94889e+06	4.94291e+06	2.81395e+06	3.01488e+06	3.39515e+06	3.27812e+06	6.50621e+06	4.03273e+06	2.89838e+06	3.15466e+06	2.32216e+06	3.25617e+06
2-propylbenzimidazole	161.132	214.683				8.96359e+06	1.49137e+07	8.05009e+06	1.65867e+07	1.10939e+07	1.17609e+07	1.5605e+07	2.13199e+07	1.87225e+07	1.81694e+07	1.52782e+07	2.61952e+07	1.23989e+07	1.37218e+07	1.24798e+07
2-pyrrolidinone, 1-methyl-	100.076	60.931	Organoheterocyclic compounds	Pyrrolidines	N-alkylpyrrolidines	5.73851e+06	5.76912e+06	9.53442e+06	4.70636e+06	6.72473e+06	6.82732e+06	1.31271e+07	1.17647e+07	1.01666e+07	8.90616e+06	6.8218e+06	7.09e+06	1.27833e+07	1.38143e+07	1.34967e+07
(2r,3r,4s,5s,6r)-2-[1,7-bis(4-hydroxyphenyl)heptan-3-yloxy]-6-(hydroxymethyl)oxane-3,4,5-triol	485.198	347.317	Phenylpropanoids and polyketides	Diarylheptanoids	Linear diarylheptanoids	2.32994e+06	2.50198e+06	2.6662e+06	2.74347e+06	2.74818e+06	2.82987e+06	3.22797e+06	4.31225e+06	3.2502e+06	4.5051e+06	4.44004e+06	5.04479e+06	3.11284e+06	2.98552e+06	3.11268e+06
(2r,3s,4s,5r,6r)-5-[(2s,3r,4r)-3,4-dihydroxy-4-(hydroxymethyl)oxolan-2-yl]oxy-2-(hydroxymethyl)-6-(2-phenylethoxy)oxane-3,4-diol	439.141	794.058	Organic oxygen compounds	Organooxygen compounds	Carbohydrates and carbohydrate conjugates	2.60428e+07	2.4344e+07	2.38332e+07	2.19827e+07	1.78923e+07	2.11269e+07	4.27284e+07	4.81071e+07	3.78957e+07	3.15138e+07	3.07109e+07	3.32698e+07	2.97168e+07	3.03572e+07	3.03465e+07
2s-amino-4-phosphonobutyric acid	138.009	508.169	Organic acids and derivatives	Carboxylic acids and derivatives	Amino acids, peptides, and analogues	2.12863e+07	2.08499e+07	1.93905e+07	2.66545e+07	2.08563e+07	2.32834e+07	2.51848e+07	2.4498e+07	2.46823e+07	2.62795e+07	2.47882e+07	2.56438e+07	2.58882e+07	2.59453e+07	2.78953e+07
(2s)-nicotine 1-oxide	148.06	686.192	Organoheterocyclic compounds	Pyridines and derivatives	Pyrrolidinylpyridines	1.80825e+06	1.0601e+06	1.64088e+08	1.744e+08	1.96931e+08	931599	1.76352e+08	1.46719e+06	1.73624e+08	1.53674e+08	1.92869e+08	2.06773e+08	1.97456e+08	2.00077e+08	2.00036e+08
3,3',5,5'-tetramethylbenzidine	241.169	85.6366	Benzenoids	Benzene and substituted derivatives	Biphenyls and derivatives	3.29874e+06	1.91461e+06	1.59639e+06	1.22889e+06	1.037e+06	2.13286e+06	2.94332e+06	5.22334e+06	2.95508e+06	1.97094e+06	1.11409e+06	1.23126e+06	1.83718e+06	1.88007e+06	1.87919e+06
3,4-dihydroxy-l-phenylalanine	198.087	645.751	Organic acids and derivatives	Carboxylic acids and derivatives	Amino acids, peptides, and analogues	3.16762e+06	3.33215e+06	3.31727e+06	3.78622e+06	3.2158e+06	3.6571e+06	3.12381e+06	3.17025e+06	2.88556e+06	3.10492e+06	3.12719e+06	3.12015e+06	2.86495e+06	2.96964e+06	2.97064e+06
3,4-dihydroxymethamphetamine	151.075	305.315	Benzenoids	Benzene and substituted derivatives	Phenethylamines	4.99033e+06	5.23746e+06	5.17523e+06	4.71822e+06	3.84905e+06	5.8969e+06	1.55669e+07	1.91727e+07	1.53256e+07	8.67595e+06	1.15489e+07	1.15504e+07	1.16826e+07	1.17957e+07	1.23596e+07
3,4-diphenylmethylideneluteolin	451.098	349.301	Phenylpropanoids and polyketides	Flavonoids	Flavones	566167	712676	614798	987830	1.14438e+06	1.3473e+06	746688	970017	773263	1.21639e+06	1.25763e+06	1.80883e+06	562037	562272	528279
3,4-methylenedioxy-.alpha.-pyrrolidinobutyrophenone	161.047	94.1342	Benzenoids	Benzene and substituted derivatives	Butyrophenones	5.05327e+06	5.13223e+06	5.11446e+06	6.20393e+06	2.02973e+06	3.24268e+06	8.43072e+06	7.72643e+06	7.1419e+06	6.46621e+06	7.74792e+06	7.45603e+06	4.91271e+06	5.1716e+06	5.16308e+06
3,4-methylenedioxybenzyl methyl ketoximine	177.054	227.527				2.65152e+08	3.11124e+08	3.47315e+08	2.26564e+08	1.24894e+08	1.11744e+08	2.14443e+08	4.67542e+08	2.21317e+08	2.3521e+08	4.84899e+08	6.52996e+08	1.71998e+08	2.14041e+08	2.13534e+08
3,5-dimethoxy-4-hydroxycinnamic acid	247.042	806.186	Phenylpropanoids and polyketides	Cinnamic acids and derivatives	Hydroxycinnamic acids and derivatives	690090	888371	896321	1.01056e+06	1.44959e+06	1.67906e+06	1.44517e+06	1.4503e+06	1.11629e+06	1.21221e+06	1.51969e+06	1.68706e+06	1.38944e+06	1.47285e+06	1.46793e+06
3,7-Dimethyluric acid	197.089	672.808	Organoheterocyclic compounds	Imidazopyrimidines	Purines and purine derivatives	5.31557e+06	5.71839e+06	5.29316e+06	7.30878e+06	4.17005e+06	5.26172e+06	5.59645e+06	7.14908e+06	5.3797e+06	7.74708e+06	1.20046e+07	6.86408e+06	5.8019e+06	6.05782e+06	6.05381e+06
3-amino-2,3-dihydrobenzoic acid	140.07	565.592	Organic acids and derivatives	Carboxylic acids and derivatives	Amino acids, peptides, and analogues	1.10577e+07	1.15543e+07	1.19648e+07	1.19323e+07	1.13992e+07	1.2279e+07	1.19606e+07	1.41601e+07	1.20755e+07	9.42174e+06	1.1783e+07	1.14474e+07	1.09468e+07	1.09801e+07	1.12682e+07
3-amino-3-(4-methylphenyl)propionic acid	180.101	297.825	Organic acids and derivatives	Carboxylic acids and derivatives	Amino acids, peptides, and analogues	3.36973e+06	3.67302e+06	3.41181e+06	2.91928e+06	2.84852e+06	4.40299e+06	6.24416e+06	7.11267e+06	6.27376e+06	7.01806e+06	9.90075e+06	6.76008e+06	5.1916e+06	5.01104e+06	5.01896e+06
3-(aminomethyl)-7-fluoroquinolin-2-ol	193.097	428.581	Organoheterocyclic compounds	Quinolines and derivatives	Quinolones and derivatives	2.14191e+06	2.38629e+06	2.11623e+06	2.58081e+06	6.44682e+06	6.52835e+06	5.35739e+06	4.18811e+06	5.0324e+06	1.14148e+06	3.80361e+06	4.23067e+06	4.44915e+06	5.02804e+06	4.53246e+06
3-aminophenol	110.071	696.319	Benzenoids	Benzene and substituted derivatives	Aniline and substituted anilines	1.23339e+08	1.26915e+08	1.24735e+08	2.12682e+08	2.36447e+08	2.34683e+08	1.53917e+08	2.04705e+08	1.55527e+08	1.63596e+08	1.68226e+08	2.10076e+08	1.82773e+08	1.81779e+08	1.92141e+08
3-Hydorxy-3-methylglutaric acid	145.049	319.565	Lipids and lipid-like molecules	Fatty Acyls	Fatty acids and conjugates	4.8782e+06	5.08088e+06	5.12787e+06	5.61237e+06	6.15965e+06	6.4819e+06	7.87344e+06	9.22566e+06	7.90637e+06	8.35703e+06	1.06661e+07	1.09374e+07	5.945e+06	5.67761e+06	5.67745e+06
3-hydroxydodecanoic acid	163.148	50.8141	Organic acids and derivatives	Hydroxy acids and derivatives	Medium-chain hydroxy acids and derivatives	1.01638e+07	6.5315e+06	5.02169e+06	5.43421e+06	4.39448e+06	9.318e+06	1.86355e+06	3.90473e+06	5.55192e+06	3.72554e+06	4.05916e+06	3.95407e+06	5.31253e+06	5.83512e+06	5.83234e+06
3-methoxytyramine	151.061	246.99	Benzenoids	Phenols	Methoxyphenols	1.14614e+07	9.94617e+06	9.55339e+06	1.03564e+07	8.14402e+06	7.68268e+06	1.18306e+07	8.67162e+06	1.16068e+07	9.63406e+06	8.39557e+06	8.68054e+06	9.60233e+06	9.67966e+06	1.07007e+07
3-methyl-2-quinoxalinone	133.101	125.35	Organoheterocyclic compounds	Diazanaphthalenes	Benzodiazines	1.03106e+07	1.71411e+06	5.76143e+06	8.49468e+06	8.75271e+06	9.31083e+06	1.066e+07	8.41033e+06	8.52264e+06	8.45201e+06	7.61551e+06	1.47793e+07	9.06145e+06	9.12678e+06	1.0692e+07
3-methyladenine	150.077	415.239	Organoheterocyclic compounds	Imidazopyrimidines	Purines and purine derivatives	1.3642e+08	1.30793e+08	1.30968e+08	1.64197e+08	1.72811e+08	1.84159e+08	2.00703e+08	1.80567e+08	1.92662e+08	1.79983e+08	1.85011e+08	1.80963e+08	1.88184e+08	1.9213e+08	1.94552e+08
3-methylhippuric acid	119.049	253.854	Organic acids and derivatives	Carboxylic acids and derivatives	Amino acids, peptides, and analogues	6.13442e+06	4.29914e+06	6.26296e+06	7.63828e+06	9.69568e+06	7.96292e+06	9.6346e+06	8.10273e+06	8.93591e+06	7.45311e+06	8.84591e+06	8.32058e+06	8.90557e+06	9.21218e+06	1.007e+07
3-methylhistidine	170.092	692.262	Organic acids and derivatives	Carboxylic acids and derivatives	Amino acids, peptides, and analogues	6.40801e+06	6.59269e+06	6.80455e+06	6.0384e+06	1.09166e+07	8.35752e+06	9.03399e+06	1.07294e+07	9.75542e+06	5.67716e+06	9.36873e+06	9.80038e+06	9.3785e+06	9.75733e+06	9.43278e+06
3-methylindole	132.08	216.981	Organoheterocyclic compounds	Indoles and derivatives	Indoles	2.15763e+07	2.23178e+07	2.11222e+07	2.2974e+07	1.99184e+07	2.35179e+07	2.20189e+07	2.10176e+07	2.28402e+07	2.08411e+07	2.05264e+07	2.12741e+07	2.10813e+07	2.22781e+07	2.21964e+07
3-Methyl-L-histidine	170.092	739.038				2.55592e+06	2.29709e+06	2.11236e+06	2.4573e+06	3.71674e+06	3.28565e+06	3.314e+06	3.61098e+06	3.43456e+06	1.90327e+06	3.2451e+06	3.51307e+06	3.02387e+06	3.04322e+06	3.20519e+06
3-methyloxyindole	148.075	216.981	Organoheterocyclic compounds	Indoles and derivatives	Indolines	1.48956e+07	1.60044e+07	1.39495e+07	1.65755e+07	1.38773e+07	1.61355e+07	1.55977e+07	1.5411e+07	1.62365e+07	1.3245e+07	1.5958e+07	1.59768e+07	1.58906e+07	1.60652e+07	1.6472e+07
3-(methylthio)-1-propanol	107.07	55.9892	Organosulfur compounds	Thioethers	Dialkylthioethers	2.82369e+07	2.9517e+07	2.10638e+07	2.9162e+07	2.79231e+07	1.74599e+07	2.99682e+07	2.87056e+07	2.34401e+07	2.81343e+07	2.98676e+07	2.81696e+07	2.83747e+07	2.84679e+07	2.97807e+07
3-methylthiopropylamine	106.069	360.914	Organosulfur compounds	Thioethers	Dialkylthioethers	1.51069e+07	1.58701e+07	1.55668e+07	6.40071e+06	6.65135e+06	7.11379e+06	3.48942e+07	3.74919e+07	3.42689e+07	1.43692e+07	1.95809e+07	2.09402e+07	2.14195e+07	2.19352e+07	2.19515e+07
3'-o-methylcytidine	258.108	290.367				1.83145e+07	1.77027e+07	1.71629e+07	1.81696e+07	1.82533e+07	1.65495e+07	2.39516e+07	2.93112e+07	2.31722e+07	1.85838e+07	2.67763e+07	2.68082e+07	2.0728e+07	2.13555e+07	2.04235e+07
(3s,4s)-5-[(3s,4s)-4,10-dihydroxy-7,9-dimethoxy-3-methyl-3,4-dihydro-1h-benzo[g]isochromen-5-yl]-7,9-dimethoxy-3-methyl-3,4-dihydro-1h-benzo[g]isochromene-4,10-diol	601.193	930.792				793390	698493	690818	794630	786103	881899	1.17856e+06	1.49844e+06	1.1909e+06	719206	953984	1.03215e+06	1.02617e+06	1.05378e+06	1.05301e+06
3-ureidopropionic acid	155.042	712.672	Organic acids and derivatives	Organic carbonic acids and derivatives	Ureas	2.85485e+07	4.07235e+07	2.91657e+07	4.11134e+07	2.51147e+07	2.61287e+07	4.13047e+07	4.33008e+07	3.02002e+07	3.21463e+07	4.89192e+07	2.97121e+07	2.80091e+07	2.78607e+07	2.96324e+07
4-[(2r,3r,4s,5s,6r)-3,4,5-trihydroxy-6-(hydroxymethyl)oxan-2-yl]oxypentan-2-yl (e)-3-(4-hydroxyphenyl)prop-2-enoate	435.182	438.44	Lipids and lipid-like molecules	Fatty Acyls	Fatty acyl glycosides	1.17039e+07	1.19867e+07	1.25524e+07	9.16066e+06	8.4145e+06	8.85215e+06	3.78708e+07	4.36001e+07	3.9732e+07	1.75799e+07	1.91934e+07	1.92836e+07	2.10093e+07	2.13765e+07	2.1011e+07
4-[5-[[4-[5-[acetyl(hydroxy)amino]pentylamino]-4-oxobutanoyl]-hydroxyamino]pentylamino]-4-oxobutanoic acid	478.291	337.555	Lipids and lipid-like molecules	Fatty Acyls	Fatty amides	9.07987e+06	1.38697e+07	1.24391e+07	1.32466e+07	9.37004e+06	9.14566e+06	5.80893e+06	5.81752e+06	4.98841e+06	9.51546e+06	9.61284e+06	9.16255e+06	7.82968e+06	8.92164e+06	8.91006e+06
4,5-didemethylsimmondsin	348.128	428.868	Organic oxygen compounds	Organooxygen compounds	Carbohydrates and carbohydrate conjugates	2.1003e+06	2.04183e+06	1.96556e+06	1.6328e+06	1.43188e+06	1.45884e+06	2.98985e+06	3.00477e+06	2.82139e+06	1.34292e+06	2.66196e+06	2.90825e+06	2.32396e+06	2.11938e+06	2.32209e+06
4-acetylbutyrate	131.073	340.385	Lipids and lipid-like molecules	Fatty Acyls	Fatty acids and conjugates	6.07577e+06	6.14539e+06	5.85608e+06	6.18557e+06	5.5612e+06	6.22341e+06	5.99835e+06	6.53297e+06	6.06143e+06	5.75684e+06	5.4758e+06	6.33004e+06	5.65692e+06	5.58114e+06	5.65622e+06
4-amino-4-methylpentanoic acid	132.113	667.597	Organic acids and derivatives	Carboxylic acids and derivatives	Amino acids, peptides, and analogues	6.34386e+06	5.85514e+06	5.8411e+06	6.2819e+06	5.49394e+06	5.89777e+06	6.87507e+06	7.47867e+06	6.53312e+06	5.36098e+06	5.98215e+06	5.99407e+06	6.14812e+06	6.15092e+06	6.34656e+06
4-amino-9-methoxypsoralen	232.061	335.049	Phenylpropanoids and polyketides	Coumarins and derivatives	Furanocoumarins	8783.17	29859.8	15577	11362.7	12417.5	35528.3	5.10769e+06	6.50764e+06	4.54901e+06	57473.8	88304.3	58211.2	1.83118e+06	1.87299e+06	2.13374e+06
4-aminoantipyrine	159.076	319.526	Organoheterocyclic compounds	Azoles	Pyrazoles	5.42292e+07	5.47268e+07	3.2742e+07	3.22027e+07	1.00448e+08	5.76374e+07	5.60525e+07	2.5752e+07	5.43596e+07	5.39811e+07	5.78792e+07	5.70565e+07	5.08799e+07	5.07613e+07	4.54017e+07
4-aminobenzoate	138.055	220.185	Benzenoids	Benzene and substituted derivatives	Benzoic acids and derivatives	7.97248e+07	7.79516e+07	7.36908e+07	5.5716e+07	6.56633e+07	6.24972e+07	8.29457e+07	9.66948e+07	9.11403e+07	6.63316e+07	7.34467e+07	7.69102e+07	7.24272e+07	7.22062e+07	6.93967e+07
4-aminophenol	110.06	181.435	Benzenoids	Benzene and substituted derivatives	Aniline and substituted anilines	2.97724e+06	3.09484e+06	2.73038e+06	3.64608e+06	1.97431e+06	2.5236e+06	3.59043e+06	3.58787e+06	3.20098e+06	3.14024e+06	4.24984e+06	3.89324e+06	7.05618e+06	7.74375e+06	6.98031e+06
4-aminopyridine	95.0606	651.515	Organoheterocyclic compounds	Pyridines and derivatives	Aminopyridines and derivatives	1.00164e+08	1.31828e+08	1.02998e+08	1.2504e+08	1.34855e+08	1.63167e+08	1.36673e+08	1.73929e+08	1.4039e+08	8.62378e+07	1.52654e+08	1.3779e+08	1.48394e+08	1.43303e+08	1.4332e+08
4.beta.-galactobiose	365.104	807.539	Organic oxygen compounds	Organooxygen compounds	Carbohydrates and carbohydrate conjugates	3.54371e+07	3.48834e+07	3.05154e+07	3.23518e+07	9.32109e+06	9.55453e+06	2.93045e+07	2.60603e+07	2.96082e+07	2.8829e+07	3.09474e+07	2.69214e+07	1.52001e+07	1.49561e+07	1.49536e+07
4-chloro-o-toluidine	142.049	732.843	Benzenoids	Benzene and substituted derivatives	Toluenes	6.86839e+06	7.52382e+06	7.32728e+06	6.92467e+06	5.8048e+06	7.67938e+06	1.53073e+07	1.85842e+07	1.32186e+07	1.16173e+07	1.12982e+07	1.16335e+07	1.07033e+07	1.1271e+07	1.12369e+07
4-(dimethylamino)cinnamaldehyde	158.1	72.9702				3.88341e+06	5.65336e+06	3.42587e+06	2.06719e+06	2.83252e+06	2.71992e+06	7.48079e+06	8.42639e+06	8.05904e+06	2.86661e+06	3.78932e+06	4.39277e+06	5.07071e+06	5.07579e+06	5.23481e+06
4-hydroxy-3-methoxyamphetamine	182.117	380.488	Benzenoids	Benzene and substituted derivatives	Phenethylamines	2.0789e+06	2.10932e+06	2.06326e+06	2.10637e+06	1.62115e+06	1.8776e+06	3.47994e+06	4.09008e+06	3.76305e+06	2.22093e+06	2.41779e+06	2.52596e+06	2.54186e+06	2.59333e+06	2.57549e+06
4-hydroxybenzaldehyde	123.044	541.971	Organic oxygen compounds	Organooxygen compounds	Carbonyl compounds	8.57438e+07	8.37092e+07	9.55594e+07	9.35346e+07	9.3683e+07	9.77614e+07	6.35362e+07	9.482e+07	6.87929e+07	6.26897e+07	9.81653e+07	9.36883e+07	8.86292e+07	9.12327e+07	9.54468e+07
4-hydroxycyclophosphamide	259.016	615.455	Organic nitrogen compounds	Organonitrogen compounds	Nitrogen mustard compounds	2.31671e+06	2.5964e+06	2.46615e+06	2.38777e+06	2.02103e+06	2.66395e+06	2.32929e+06	2.79132e+06	2.32196e+06	2.30213e+06	2.52563e+06	2.14608e+06	2.21887e+06	2.25442e+06	2.37898e+06
4-hydroxymandelonitrile	150.054	384.539	Benzenoids	Phenols	1-hydroxy-2-unsubstituted benzenoids	6.2885e+06	8.8099e+06	7.32551e+06	1.14798e+07	6.70742e+06	1.12623e+07	9.08727e+06	9.9073e+06	9.62291e+06	1.06956e+07	9.12301e+06	1.13156e+07	8.80799e+06	9.49159e+06	8.93094e+06
4-hydroxynonenal	157.122	170.171	Lipids and lipid-like molecules	Fatty Acyls	Fatty alcohols	2.58686e+06	2.62708e+06	2.29073e+06	2.43652e+06	2.45163e+06	1.82714e+06	1.7518e+06	1.43698e+06	1.67029e+06	1.90611e+06	2.01446e+06	2.102e+06	2.16149e+06	2.13185e+06	2.08802e+06
4-methyl-1h-pyrazole	83.0607	241.399	Organoheterocyclic compounds	Azoles	Pyrazoles	2.10233e+07	1.22275e+07	1.17e+07	1.87844e+07	7.74368e+06	9.7727e+06	1.81294e+07	1.38383e+07	1.23296e+07	1.35206e+07	1.77536e+07	1.67661e+07	1.16983e+07	1.21449e+07	1.21321e+07
4-methylhippuric acid	119.049	541.971	Benzenoids	Benzene and substituted derivatives	Benzoic acids and derivatives	7.33925e+07	7.08715e+07	8.02335e+07	7.99105e+07	7.80288e+07	8.1014e+07	5.29697e+07	8.01964e+07	5.88439e+07	5.36834e+07	8.4666e+07	7.93852e+07	7.42058e+07	7.71959e+07	8.00145e+07
4'-methyl-n-methylhexanophenone	220.169	311.718	Organic oxygen compounds	Organooxygen compounds	Carbonyl compounds	2.00132e+06	2.09469e+06	1.91192e+06	4.37887e+06	4.3982e+06	3.60551e+06	7.45345e+06	6.83838e+06	6.72845e+06	5.78754e+06	6.09597e+06	7.6069e+06	5.47508e+06	5.94434e+06	5.93548e+06
4-methylquinolin-2-ol	160.096	492.17	Organoheterocyclic compounds	Quinolines and derivatives	Quinolones and derivatives	1.0859e+08	1.05333e+08	9.93631e+07	1.09613e+08	1.15469e+08	1.25431e+08	1.06501e+08	1.05936e+08	1.01979e+08	6.09696e+07	7.39782e+07	8.011e+07	1.09754e+08	1.12021e+08	1.11979e+08
4-methylumbelliferyl .beta.-d-glucuronide	353.084	679.838	Phenylpropanoids and polyketides	Coumarins and derivatives	Coumarin glycosides	7.5324e+06	7.26213e+06	6.89349e+06	7.78837e+06	7.51681e+06	7.09788e+06	6.69527e+06	9.56778e+06	7.78862e+06	8.04794e+06	8.37189e+06	7.27884e+06	7.37535e+06	7.38143e+06	7.42394e+06
4-ohe2-1-n7gua	438.231	499.928	Lipids and lipid-like molecules	Steroids and steroid derivatives	Estrane steroids	2.17188e+06	2.23135e+06	1.88336e+06	3.07591e+06	1.67563e+06	1.66027e+06	2.84361e+06	2.91932e+06	2.66301e+06	1.50286e+06	2.39134e+06	2.25359e+06	2.51203e+06	2.51266e+06	2.44385e+06
4-piperidinecarboxamide	129.091	313.822	Organoheterocyclic compounds	Piperidines	Piperidinecarboxylic acids and derivatives	7.11516e+06	6.8479e+06	6.63911e+06	7.62874e+06	8.16193e+06	8.37133e+06	1.0839e+07	1.31558e+07	1.11872e+07	6.1711e+06	9.37049e+06	9.32808e+06	9.05169e+06	9.0816e+06	9.28523e+06
4-Pyridinecarboxylic acid	124.039	514.347				1.54824e+06	1.59266e+06	1.42141e+06	1.54468e+06	1.71554e+06	897612	948537	1.45779e+06	1.63924e+06	1.21307e+07	2.52688e+06	1.21912e+07	1.50734e+06	1.56936e+06	1.49705e+06
4-quinolinecarboxylate	174.077	93.7327	Organoheterocyclic compounds	Quinolines and derivatives	Quinoline carboxylic acids	6.4949e+06	5.00108e+06	6.63275e+06	6.80525e+06	4.40809e+06	4.9037e+06	1.03252e+07	1.09576e+07	1.00103e+07	7.57881e+06	9.60688e+06	8.87397e+06	7.06078e+06	7.30157e+06	7.29444e+06
5-(2-aminopropyl)-2,3-dihydro-1h-indene	176.122	1097.02				3.35495e+06	7.04249e+06	6.57758e+06	4.27518e+06	4.93672e+06	4.92229e+06	3.26275e+06	8.7859e+06	5.85193e+06	3.07119e+06	3.26483e+06	2.88747e+06	3.31558e+06	3.30774e+06	3.44413e+06
5-(2-hydroxyethyl)-4-methylthiazole	144.047	603.321	Organoheterocyclic compounds	Azoles	Thiazoles	2.13495e+07	2.2987e+07	2.02646e+07	2.46495e+07	1.97739e+07	2.10293e+07	2.09696e+07	2.10081e+07	2.22014e+07	1.79264e+07	2.25622e+07	2.16187e+07	2.07292e+07	2.08331e+07	2.33997e+07
5alpha-pregnan-3,20-dione	317.243	600.528	Lipids and lipid-like molecules	Steroids and steroid derivatives	Pregnane steroids	2.18689e+06	2.25888e+06	2.2423e+06	2.25698e+06	2.08837e+06	2.40871e+06	2.21383e+06	2.19698e+06	2.07527e+06	2.25627e+06	2.1243e+06	2.23332e+06	2.1773e+06	2.26724e+06	2.26522e+06
5.alpha.-pregnane-3.alpha.,21-diol-11,20-dione	295.226	81.1626	Lipids and lipid-like molecules	Steroids and steroid derivatives	Hydroxysteroids	1.57447e+07	1.58327e+07	1.50987e+07	1.56543e+07	1.44447e+07	1.45255e+07	1.82264e+07	1.5959e+07	1.95627e+07	1.70219e+07	1.51957e+07	1.5658e+07	1.61037e+07	1.6695e+07	1.61168e+07
5-amino-1,3,3-trimethylcyclohexanemethylamine	154.159	358.164	Organic nitrogen compounds	Organonitrogen compounds	Cyclohexylamines	2.15478e+06	2.093e+06	2.05416e+06	2.29361e+06	2.24498e+06	2.40864e+06	3.67487e+06	4.03285e+06	3.64223e+06	2.78073e+06	3.21729e+06	3.38366e+06	3.147e+06	3.23239e+06	3.23022e+06
5-aminosalicylic acid	136.016	265.212	Benzenoids	Benzene and substituted derivatives	Benzoic acids and derivatives	4.29574e+07	7.55439e+07	6.5082e+07	3.97081e+07	5.42487e+07	5.51394e+07	7.15955e+07	8.7319e+07	7.09804e+07	7.08829e+07	8.83434e+07	7.82912e+07	7.75521e+07	7.77177e+07	8.05273e+07
5-androstene-3.beta.,17.beta.-diol	173.132	51.3697	Lipids and lipid-like molecules	Steroids and steroid derivatives	Androstane steroids	1.90316e+07	1.32703e+07	9.71312e+06	1.29358e+07	9.00777e+06	1.94609e+07	4.78161e+06	8.71158e+06	1.15237e+07	7.13735e+06	7.68997e+06	8.51693e+06	1.2557e+07	1.34552e+07	1.34473e+07
5.beta.-pregnane-3.alpha.,17-diol-20-one	335.257	78.0464	Lipids and lipid-like molecules	Steroids and steroid derivatives	Pregnane steroids	4.86557e+06	4.9384e+06	4.71853e+06	4.62066e+06	4.0236e+06	3.85099e+06	3.19586e+06	3.54617e+06	3.36359e+06	3.97331e+06	3.49956e+06	2.6246e+06	3.27371e+06	3.27311e+06	3.23122e+06
(5e)-4-methyl-5-{[(phenylsulfonyl)oxy]imino}-1,1'-bi(cyclohexane)-3,6-dien-2-one	360.104	700.061	Benzenoids	Benzene and substituted derivatives	Benzenesulfonic acids and derivatives	2.47122e+07	2.44019e+07	2.46255e+07	3.11023e+07	3.10125e+07	3.37815e+07	1.88094e+07	2.43224e+07	1.79165e+07	1.33751e+07	1.67685e+07	1.94739e+07	2.36705e+07	2.37105e+07	2.49648e+07
5'-(furan-3-yl)-4a-hydroxy-4,7-dimethylspiro[5,6,7,8a-tetrahydro-1h-naphthalene-8,3'-oxolane]-2,2'-dione	353.12	311.807	Lipids and lipid-like molecules	Prenol lipids	Terpene lactones	4.06279e+06	3.92148e+06	4.35972e+06	3.54468e+06	5.74698e+06	6.00419e+06	8.87179e+06	1.12518e+07	8.91203e+06	8.15415e+06	7.11575e+06	7.87223e+06	7.64424e+06	7.6528e+06	7.90499e+06
5-heptenoic acid, 7-[(1r,4s,5s,6r)-6-[(1e,3s)-3-hydroxy-1-octen-1-yl]-2-oxabicyclo[2.2.1]hept-5-yl]-, (5z)-	373.243	1020.37	Lipids and lipid-like molecules	Fatty Acyls	Eicosanoids	1.61099e+06	1.58586e+06	1.65432e+06	1.91901e+06	2.0601e+06	2.41972e+06	2.42366e+06	2.61149e+06	2.6373e+06	1.86295e+06	2.49259e+06	2.29408e+06	2.20249e+06	2.3701e+06	2.36248e+06
5-hydroxy-l-tryptophan	441.172	399.894	Organoheterocyclic compounds	Indoles and derivatives	Tryptamines and derivatives	8.58644e+06	9.71452e+06	1.09523e+07	6.74143e+06	6.34838e+06	5.07426e+06	1.2647e+07	1.52087e+07	1.21583e+07	1.01164e+07	1.24346e+07	1.1195e+07	1.18756e+07	1.24867e+07	1.24909e+07
5-Hydroxytryptophol (5HTOL)	160.079	279.685				4.33496e+06	4.81978e+06	4.3772e+06	4.74457e+06	4.57129e+06	4.29564e+06	928572	769508	1.13704e+06	4.30108e+06	4.71078e+06	4.19544e+06	4.47293e+06	4.40402e+06	4.40312e+06
5-methoxypsoralen	217.071	192.395	Phenylpropanoids and polyketides	Coumarins and derivatives	Furanocoumarins	6.83265e+07	7.52732e+07	6.90878e+07	8.29291e+07	8.70743e+07	8.20396e+07	8.42892e+07	8.7314e+07	8.39492e+07	8.85602e+07	9.01564e+07	1.04032e+08	8.65126e+07	8.68369e+07	9.34354e+07
5-methoxytryptophan	235.107	426.063	Organoheterocyclic compounds	Indoles and derivatives	Tryptamines and derivatives	1.76876e+07	1.81311e+07	1.68548e+07	1.93864e+07	2.03457e+07	2.09829e+07	3.26914e+07	4.18025e+07	3.10199e+07	1.91847e+07	2.27793e+07	2.49956e+07	1.92633e+07	1.89246e+07	1.76399e+07
5-methyl-5,6-dihydrouracil	129.065	138.571	Organoheterocyclic compounds	Diazines	Pyrimidines and pyrimidine derivatives	1.28295e+08	1.37902e+08	1.23892e+08	1.14873e+08	1.29003e+08	1.30483e+08	1.23398e+08	1.64403e+08	1.24616e+08	9.76547e+07	1.31004e+08	1.24239e+08	1.29205e+08	1.32843e+08	1.32742e+08
5-methylcytidine	258.108	395.793	"Nucleosides, nucleotides, and analogues"	Pyrimidine nucleosides		1.53072e+07	9.75662e+06	1.09978e+07	1.23741e+07	1.65894e+07	1.35197e+07	1.49479e+07	1.3143e+07	1.45399e+07	1.19775e+07	1.20805e+07	1.06689e+07	1.20052e+07	1.15877e+07	1.29598e+07
5-methylcytosine	126.066	317.689	Organoheterocyclic compounds	Diazines	Pyrimidines and pyrimidine derivatives	2.57244e+07	2.73583e+07	2.78159e+07	2.84098e+07	2.6594e+07	2.94937e+07	3.42966e+07	3.66919e+07	3.43468e+07	2.92846e+07	3.452e+07	3.55931e+07	3.40208e+07	3.54827e+07	3.54383e+07
5-methylisoxazol-3-amine	99.0442	466.09				9.06092e+06	8.38359e+06	7.55457e+06	9.07694e+06	8.86511e+06	8.19214e+06	1.04919e+07	9.24245e+06	9.38936e+06	7.58891e+06	2.12764e+07	7.82441e+06	8.37439e+06	8.39006e+06	9.40721e+06
6,3',4'-trimethoxyflavanone	315.104	633.098	Phenylpropanoids and polyketides	Flavonoids	O-methylated flavonoids	2.54075e+06	2.6756e+06	2.49679e+06	2.37137e+06	2.12521e+06	2.08673e+06	3.32839e+06	3.93517e+06	3.50606e+06	3.24287e+06	3.67574e+06	3.50468e+06	2.84627e+06	2.91017e+06	2.90963e+06
6',7'-dihydroxybergamottin	373.182	278.095	Phenylpropanoids and polyketides	Coumarins and derivatives	Furanocoumarins	1.70606e+07	1.69227e+07	8.43333e+06	8.73424e+06	8.9704e+06	1.46028e+07	1.17765e+07	2.6203e+07	1.04829e+07	1.90349e+07	1.14958e+07	8.49818e+06	1.27881e+07	1.10345e+07	1.10655e+07
6,7-dimethyltetrahydropterin	140.034	213.809	Organoheterocyclic compounds	Pteridines and derivatives	Pterins and derivatives	2.557e+07	2.56154e+07	2.49923e+07	2.53864e+07	2.63398e+07	2.59088e+07	3.19597e+07	3.62502e+07	3.15534e+07	2.4579e+07	3.14746e+07	3.48848e+07	2.63537e+07	2.57988e+07	2.58096e+07
6-aminocaproic acid	132.102	702.897	Lipids and lipid-like molecules	Fatty Acyls	Fatty acids and conjugates	3.59197e+06	3.32917e+06	3.65065e+06	3.50368e+06	3.298e+06	3.43739e+06	3.83696e+06	4.50275e+06	4.08241e+06	3.26589e+06	4.10593e+06	3.86246e+06	3.9552e+06	3.96221e+06	4.08204e+06
6-cyanoquinoxaline-2,3-dione	188.055	771.408	Organoheterocyclic compounds	Diazanaphthalenes	Benzodiazines	1.6657e+06	1.74104e+06	1.75098e+06	2.24242e+06	2.03003e+06	2.38045e+06	1.38396e+06	1.58502e+06	1.39707e+06	1.31481e+06	1.46084e+06	1.60708e+06	1.71135e+06	1.72142e+06	1.73578e+06
6-hydroxynicotinic acid	122.024	214.164	Organoheterocyclic compounds	Pyridines and derivatives	Pyridinecarboxylic acids and derivatives	1.83586e+07	1.85577e+07	1.85169e+07	1.93454e+07	1.28203e+07	1.9166e+07	2.367e+07	2.7118e+07	2.25275e+07	1.78988e+07	2.34255e+07	2.55063e+07	1.93303e+07	1.66987e+07	1.93704e+07
6-methylchromone	161.044	116.613	Organoheterocyclic compounds	Benzopyrans	1-benzopyrans	5.41519e+06	6.07535e+06	5.54301e+06	5.46821e+06	6.86286e+06	4.53142e+06	6.08457e+06	6.24203e+06	6.24e+06	6.41315e+06	4.8353e+06	5.03599e+06	5.63021e+06	5.63799e+06	5.85032e+06
7,8-dihydroneopterin	256.08	315.803	Organoheterocyclic compounds	Pteridines and derivatives	Pterins and derivatives	8.04894e+06	8.25827e+06	8.62019e+06	7.74941e+06	7.5381e+06	7.90253e+06	1.04894e+07	1.04653e+07	9.63902e+06	8.06093e+06	9.96615e+06	9.73999e+06	1.03807e+07	1.07312e+07	1.07163e+07
7-amino-4-methylquinolin-2-ol	175.071	750.321	Organoheterocyclic compounds	Quinolines and derivatives	Aminoquinolines and derivatives	1.0593e+07	1.07492e+07	1.11471e+07	8.0541e+06	6.85615e+06	7.69232e+06	1.66443e+07	1.79112e+07	1.49164e+07	1.152e+07	1.13978e+07	1.10699e+07	1.11032e+07	1.11396e+07	1.15895e+07
(7e,13e)-9,15-dihydroxy-4,10,16-trimethyl-1,5,11-trioxacyclohexadeca-7,13-diene-2,6,12-trione	365.104	855.723				4.82419e+06	4.92476e+06	5.05585e+06	4.7497e+06	3.82296e+06	4.17512e+06	4.60409e+06	5.43831e+06	4.68793e+06	5.05835e+06	4.55164e+06	4.48971e+06	4.1727e+06	4.27028e+06	4.27044e+06
7-keto-8-aminopelargonic acid	188.11	56.6427	Lipids and lipid-like molecules	Fatty Acyls	Fatty acids and conjugates	1.93977e+06	1.90754e+06	1.78164e+06	635648	987588	872715	1.71089e+06	2.17961e+06	2.2189e+06	821392	465950	500293	1.15824e+06	1.32983e+06	1.32633e+06
7-methylguanosine	166.072	337.343	"Nucleosides, nucleotides, and analogues"	Purine nucleosides		3.61422e+07	3.73141e+07	3.36637e+07	3.84508e+07	3.53005e+07	3.99796e+07	3.57998e+07	3.89509e+07	3.79638e+07	3.68662e+07	3.70307e+07	4.25094e+07	3.82381e+07	3.83543e+07	4.03672e+07
9-oxo-11-(3-pentyl-2-oxiranyl)-10e-undecenoic acid	293.21	58.0658	Lipids and lipid-like molecules	Fatty Acyls	Fatty acids and conjugates	6.30197e+07	3.57711e+07	6.01165e+07	2.68032e+07	2.66235e+07	2.67078e+07	6.5541e+07	7.81345e+07	8.50697e+07	3.67103e+07	3.77288e+07	5.33592e+07	5.1512e+07	5.15861e+07	5.34488e+07
Abietic acid	123.117	420.922	Lipids and lipid-like molecules	Prenol lipids	Diterpenoids	1.48544e+06	1.42941e+06	1.22703e+06	1.53721e+06	1.62286e+06	1.93077e+06	1.69567e+06	1.8178e+06	1.84806e+06	811233	1.8879e+06	1.79397e+06	1.75925e+06	1.78133e+06	1.84249e+06
Abscisic Acid (cis,trans)	247.132	113.585				5.85308e+06	6.28129e+06	4.70797e+06	6.51238e+06	8.20234e+06	8.8382e+06	7.72288e+06	8.28985e+06	8.32818e+06	4.02922e+06	8.48279e+06	7.60678e+06	8.40926e+06	8.61454e+06	1.01239e+07
Acephate	205.997	553.785				5.51738e+06	6.24862e+06	5.56329e+06	1.76003e+07	1.35236e+07	1.14655e+07	7.18232e+06	8.64305e+06	7.6635e+06	7.57857e+06	1.01473e+07	9.84863e+06	1.00162e+07	1.00638e+07	1.07408e+07
Acetaminophen	152.07	508.167	Benzenoids	Phenols	1-hydroxy-2-unsubstituted benzenoids	7.94602e+06	1.09756e+07	8.52137e+06	1.40155e+07	1.42536e+07	1.36236e+07	1.4041e+07	1.39432e+07	1.43274e+07	1.35278e+07	1.63673e+07	1.61083e+07	1.37673e+07	1.38024e+07	1.44114e+07
Acetohexamide	347.084	745.197	Organic oxygen compounds	Organooxygen compounds	Carbonyl compounds	5.35884e+06	5.44384e+06	4.58556e+06	5.23762e+06	5.31717e+06	5.12692e+06	3.71784e+06	5.06095e+06	3.69375e+06	3.90708e+06	5.53669e+06	5.09143e+06	4.96398e+06	4.9996e+06	5.21683e+06
Acetoin	89.0422	360.874	Organic oxygen compounds	Organooxygen compounds	Carbonyl compounds	5.41901e+07	5.67215e+07	5.44488e+07	2.18033e+07	2.49504e+07	2.55088e+07	1.22381e+08	1.32819e+08	1.24037e+08	5.14605e+07	6.75682e+07	7.45069e+07	7.58149e+07	7.58969e+07	7.72778e+07
Acetylcholine	146.117	388.24	Organic nitrogen compounds	Organonitrogen compounds	Quaternary ammonium salts	1.04224e+07	1.12427e+07	1.02539e+07	1.21617e+07	1.28314e+07	1.25308e+07	1.49432e+07	1.72418e+07	1.50574e+07	1.06882e+07	1.42685e+07	1.41854e+07	1.40725e+07	1.42686e+07	1.4267e+07
Adenine	136.061	265.753	Organoheterocyclic compounds	Imidazopyrimidines	Purines and purine derivatives	1.16854e+10	1.17587e+10	9.47106e+09	1.07457e+10	8.5777e+09	9.00432e+09	1.21524e+10	1.31169e+10	1.23034e+10	1.0116e+10	1.21978e+10	1.21469e+10	1.24835e+10	1.28177e+10	1.28102e+10
Adenosine	268.103	286.803	"Nucleosides, nucleotides, and analogues"	Purine nucleosides		2.15278e+09	2.30273e+09	2.25274e+09	2.55148e+09	2.87887e+09	2.94182e+09	4.16144e+09	5.20033e+09	3.59787e+09	2.27612e+09	3.5578e+09	3.24828e+09	3.42726e+09	3.53964e+09	3.56379e+09
Adenosine 3'-monophosphate	695.131	815.469	"Nucleosides, nucleotides, and analogues"	Ribonucleoside 3'-phosphates		3.34509e+06	3.86208e+06	3.90421e+06	2.55888e+06	2.45985e+06	2.71839e+06	5.8031e+06	8.53556e+06	6.06804e+06	2.59394e+06	4.29197e+06	4.48187e+06	4.23452e+06	4.30075e+06	4.40478e+06
Adenosine 5'-monophosphate	348.069	813.905	Nucleosides, nucleotides, and analogues	Purine nucleotides	Purine ribonucleotides	5.60062e+08	7.62313e+08	7.5331e+08	6.67198e+08	6.50246e+08	7.22855e+08	9.95656e+08	1.12827e+09	1.00654e+09	6.73691e+08	7.36252e+08	7.20064e+08	7.01156e+08	7.12568e+08	7.22006e+08
Adenosine monophosphate (AMP)	348.069	960.854	"Nucleosides, nucleotides, and analogues"	Purine nucleotides	Purine ribonucleotides	1.0906e+07	2.07817e+06	1.29605e+07	1.74022e+07	2.97477e+06	3.08783e+06	5.75022e+06	4.19043e+06	3.06655e+07	2.3733e+06	4.4959e+06	4.87483e+06	3.92141e+06	3.3275e+06	3.93091e+06
Aflatoxin b1	313.088	212.162	Phenylpropanoids and polyketides	Coumarins and derivatives	Furanocoumarins	2.40376e+07	2.47336e+07	2.87191e+07	1.58499e+07	1.89183e+07	1.84982e+07	2.98444e+07	4.81362e+07	4.13686e+07	2.77309e+07	3.19007e+07	2.09893e+07	3.24551e+07	3.28471e+07	3.31874e+07
Aflatoxin g1	351.068	625.223	Phenylpropanoids and polyketides	Coumarins and derivatives	Furanocoumarins	4.04108e+07	4.08013e+07	3.85e+07	3.63771e+07	3.83697e+07	4.05518e+07	4.66702e+07	5.35486e+07	4.47192e+07	5.62538e+07	6.62185e+07	7.1735e+07	4.54888e+07	4.58829e+07	4.65448e+07
Agomelatine	304.149	745.133	Organic acids and derivatives	Carboxylic acids and derivatives	Carboxylic acid derivatives	2.28657e+07	2.46258e+07	2.20108e+07	2.40381e+07	3.5286e+07	3.67811e+07	4.04119e+07	3.34818e+07	2.77915e+07	1.88078e+07	3.05214e+07	3.53764e+07	3.38061e+07	3.38655e+07	3.61932e+07
Ala-Ala	161.107	340.394	Organoheterocyclic compounds	Indoles and derivatives	Tryptamines and derivatives	2.24336e+08	2.24249e+08	2.16775e+08	1.92928e+08	2.14605e+08	2.05595e+08	2.49374e+08	2.5782e+08	2.53656e+08	1.91606e+08	2.30386e+08	2.36007e+08	2.45684e+08	2.45696e+08	2.47676e+08
Ala-Ala-Lys	289.186	800.561	Organic acids and derivatives	Carboxylic acids and derivatives	Amino acids, peptides, and analogues	1.97875e+06	2.13045e+06	1.96753e+06	2.24717e+06	2.22779e+06	2.15416e+06	2.39488e+06	2.26924e+06	2.21019e+06	1.26845e+06	2.19342e+06	2.34054e+06	2.12553e+06	2.21634e+06	2.21882e+06
Ala-Glu	219.097	775.017	Organic acids and derivatives	Carboxylic acids and derivatives	Amino acids, peptides, and analogues	3.26853e+06	3.28764e+06	3.02945e+06	2.98771e+06	3.10597e+06	2.89016e+06	3.12662e+06	3.64715e+06	3.19317e+06	2.58302e+06	2.8003e+06	3.39073e+06	3.19862e+06	3.3424e+06	3.34172e+06
Ala-Ile	203.134	449.818	Organic acids and derivatives	Carboxylic acids and derivatives	Amino acids, peptides, and analogues	1.20763e+07	2.91242e+07	1.9077e+07	2.16067e+07	2.88362e+07	1.06038e+07	2.64986e+07	2.24388e+07	2.56385e+07	1.62817e+07	2.11311e+07	2.73371e+07	2.17689e+07	2.34636e+07	2.17147e+07
Ala-Ile-Arg	359.227	448.998	Organic acids and derivatives	Carboxylic acids and derivatives	Amino acids, peptides, and analogues	1.06483e+07	1.06286e+07	9.80285e+06	7.6885e+06	9.12472e+06	8.01626e+06	9.67013e+06	1.1936e+07	1.09087e+07	1.02541e+07	1.03453e+07	9.79777e+06	1.11451e+07	1.11019e+07	1.20647e+07
Ala-Val-Lys	317.217	720.113	Organic acids and derivatives	Carboxylic acids and derivatives	Amino acids, peptides, and analogues	6.18047e+06	4.91969e+06	3.80841e+06	6.31371e+06	5.36565e+06	6.01793e+06	6.07308e+06	4.60956e+06	6.24054e+06	3.46743e+06	5.56247e+06	5.99823e+06	5.83947e+06	6.24925e+06	6.23059e+06
Albizziin	105.074	701.379	Organic acids and derivatives	Carboxylic acids and derivatives	Amino acids, peptides, and analogues	977402	4.52561e+06	4.03007e+06	2.79238e+06	4.58526e+06	4.50553e+06	2.74338e+06	2.98174e+06	4.59311e+06	4.06621e+06	4.50543e+06	4.87604e+06	4.48711e+06	4.49128e+06	4.57443e+06
Alitame	159.076	355.216	Organic acids and derivatives	Carboxylic acids and derivatives	Amino acids, peptides, and analogues	6.39611e+07	1.98541e+07	4.78649e+07	5.31575e+07	6.91611e+07	6.37388e+07	6.54883e+07	9.42104e+07	8.57409e+07	6.96281e+07	6.79577e+07	6.23062e+07	4.63905e+07	5.71314e+07	5.70371e+07
.alpha.-cyperone	163.132	56.0376	Lipids and lipid-like molecules	Prenol lipids	Sesquiterpenoids	8.86024e+07	8.73874e+07	6.12392e+07	8.34016e+07	7.72202e+07	5.03824e+07	9.32527e+07	8.8099e+07	7.09376e+07	7.66613e+07	8.41501e+07	7.83632e+07	8.53935e+07	8.63596e+07	8.7167e+07
alpha-D-Glucose 1-phosphate	261.036	822.669	Organic oxygen compounds	Organooxygen compounds	Carbohydrates and carbohydrate conjugates	1.15194e+06	1.08925e+06	1.15176e+06	1.12435e+06	1.11462e+06	1.14907e+06	1.03463e+06	1.24543e+06	1.05328e+06	773136	1.12852e+06	1.04883e+06	1.00096e+06	1.00758e+06	1.04847e+06
.alpha.-d-(+)-talose	163.06	538.612	Organic oxygen compounds	Organooxygen compounds	Carbohydrates and carbohydrate conjugates	7.99745e+07	6.39983e+07	8.67378e+07	5.09836e+07	5.3723e+07	6.1466e+07	8.12514e+07	8.80429e+07	8.80845e+07	8.06131e+07	8.85469e+07	9.64408e+07	9.18539e+07	9.68519e+07	9.18549e+07
.alpha.-ionone	175.148	385.586	Lipids and lipid-like molecules	Prenol lipids	Sesquiterpenoids	1.04067e+07	1.09502e+07	1.05655e+07	1.19427e+07	9.68078e+06	1.10701e+07	1.11998e+07	1.22608e+07	1.10434e+07	1.21828e+07	1.98324e+06	1.67595e+07	1.16611e+07	1.21106e+07	1.20952e+07
.alpha.-L-Glu-L-Asp	263.087	883.811	Organic acids and derivatives	Peptidomimetics	Hybrid peptides	4.88017e+06	4.9006e+06	4.71284e+06	4.60167e+06	5.17875e+06	5.42033e+06	7.24399e+06	8.92965e+06	7.34659e+06	5.0843e+06	6.11365e+06	6.64301e+06	6.34026e+06	6.56561e+06	6.56259e+06
.alpha.-methyltryptamine	158.096	204.462	Organoheterocyclic compounds	Indoles and derivatives	Indoles	9.09612e+07	9.17178e+07	8.22839e+07	9.73815e+07	9.84036e+07	9.86368e+07	9.67087e+07	1.02457e+08	1.02194e+08	7.45438e+07	9.97373e+07	9.60432e+07	9.82216e+07	9.86749e+07	1.01808e+08
alpha-N-Acetyl-L-glutamine	171.076	683.162				1.92865e+07	1.5122e+07	1.40449e+07	1.68009e+07	1.63117e+07	1.58817e+07	1.43778e+07	1.9262e+07	1.75894e+07	1.48061e+07	1.71231e+07	1.70149e+07	1.62459e+07	1.5972e+07	1.62457e+07
alpha-Tocopherol (Vitamin E)	431.387	81.7842	Lipids and lipid-like molecules	Prenol lipids	Quinone and hydroquinone lipids	1.35685e+06	1.11071e+06	1.12562e+06	801336	631823	805424	1.80083e+06	2.00641e+06	2.06491e+06	1.38834e+06	996541	845609	959877	959691	909114
A-methylserine	120.011	589.052	Organic acids and derivatives	Carboxylic acids and derivatives	Amino acids, peptides, and analogues	1.26721e+06	1.73853e+06	1.40106e+06	2.19897e+06	541352	1.30147e+06	1.29678e+06	1.35947e+06	1.35114e+06	1.79844e+06	2.18905e+06	1.90966e+06	1.26938e+06	1.314e+06	1.3635e+06
Ametryne	228.138	183.852	Organoheterocyclic compounds	Triazines	1,3,5-triazines	1.07707e+06	1.18706e+06	975893	756045	680225	1.00089e+06	4.13958e+06	4.28282e+06	3.77008e+06	1.47725e+06	1.6827e+06	1.58419e+06	1.81862e+06	1.94399e+06	1.93876e+06
Aminobutyl benzamide	193.133	432.275	Benzenoids	Benzene and substituted derivatives	Benzoic acids and derivatives	9.46811e+07	9.82754e+07	9.32408e+07	1.36304e+08	1.30029e+08	1.34328e+08	1.77919e+08	2.34336e+08	1.99513e+08	1.86498e+08	2.33339e+08	2.41736e+08	1.747e+08	1.7553e+08	1.78423e+08
Amylcinnamic aldehyde	147.076	864.399				1.79519e+07	1.6113e+07	2.17562e+07	1.53326e+07	202907	1.32853e+07	186054	1.74515e+07	1.80032e+07	2.06835e+07	1.77111e+07	1.91624e+07	2.26154e+07	1.98504e+07	1.96281e+07
Aniline	94.0653	508.167	Benzenoids	Benzene and substituted derivatives	Aniline and substituted anilines	4.39094e+06	4.10581e+06	4.18892e+06	6.25948e+06	6.76678e+06	6.93083e+06	6.4792e+06	7.45968e+06	6.67354e+06	6.50427e+06	8.11233e+06	7.50759e+06	7.09568e+06	7.16559e+06	7.23729e+06
Anisomycin	266.159	812.509	Benzenoids	Phenol ethers	Anisoles	2.81211e+07	2.95742e+07	2.68565e+07	3.24667e+07	4.56624e+07	3.05882e+07	5.22812e+07	6.81193e+07	3.73081e+07	2.26789e+07	4.05928e+07	7.45904e+07	3.53929e+07	3.55882e+07	3.82963e+07
Anserine	241.154	581.221	Organic acids and derivatives	Peptidomimetics	Hybrid peptides	7.24242e+06	1.20684e+07	1.10698e+07	1.16288e+07	1.75076e+07	1.35394e+07	2.95914e+07	1.35871e+07	1.59096e+07	1.043e+07	3.08689e+07	2.69771e+07	2.16494e+07	1.83e+07	2.15175e+07
Anthranilic acid (Vitamin L1)	120.044	171.243	Benzenoids	Benzene and substituted derivatives	Benzoic acids and derivatives	3.13886e+06	3.51736e+06	8.65939e+06	2.15722e+06	2.83296e+06	2.88492e+06	5.43701e+06	3.29321e+06	2.70054e+06	2.4644e+06	2.32274e+06	4.82491e+06	5.43295e+06	5.47577e+06	6.26247e+06
Antipyrine	189.127	215.01	Organoheterocyclic compounds	Azoles	Pyrazoles	1.60715e+07	1.65916e+07	2.6368e+07	1.84307e+07	2.78585e+07	1.8677e+07	2.03094e+07	2.27985e+07	3.78676e+07	2.49481e+07	2.59701e+07	4.92245e+07	2.0387e+07	2.04097e+07	2.09442e+07
Apigenin 7-glucoside	455.115	794.058	Phenylpropanoids and polyketides	Flavonoids	Flavonoid glycosides	8.42846e+06	7.57662e+06	7.50315e+06	6.885e+06	6.30106e+06	8.33146e+06	1.3357e+07	1.56735e+07	1.18571e+07	9.71187e+06	1.02948e+07	1.08041e+07	1.01989e+07	1.02487e+07	1.06417e+07
Arachidoyl ethanolamide	356.351	92.3923	Organic nitrogen compounds	Organonitrogen compounds	Amines	8.81275e+06	9.89177e+06	1.15772e+07	9.50376e+06	8.14695e+06	1.30695e+07	1.31499e+07	9.90724e+06	1.00936e+07	1.23112e+07	1.00736e+07	9.10307e+06	8.61147e+06	8.62822e+06	8.07553e+06
Arcaine	173.139	495.991	Organic nitrogen compounds	Organonitrogen compounds	Guanidines	1.4794e+07	1.59529e+07	1.43101e+07	1.61719e+07	1.3836e+07	2.17013e+07	2.26896e+07	2.58562e+07	2.2106e+07	2.24247e+07	2.52173e+07	2.78994e+07	2.14924e+07	2.20404e+07	2.20225e+07
Arecaidine	124.076	679.323				3.28566e+06	2.64122e+06	3.11261e+06	2.8225e+06	2.44808e+06	3.36385e+06	3.2272e+06	2.80626e+06	2.94e+06	3.1111e+06	2.92748e+06	2.40984e+06	2.50683e+06	2.57057e+06	2.73699e+06
Arg-gly	232.117	210.899	Organic acids and derivatives	Carboxylic acids and derivatives	Amino acids, peptides, and analogues	1.62069e+07	2.12088e+07	2.27436e+07	7.54181e+06	1.15773e+07	9.24203e+06	4.63314e+07	4.66795e+07	7.09747e+07	3.44278e+07	2.60477e+07	2.17674e+07	2.24474e+07	2.2497e+07	2.00072e+07
Arg-Gly-Asp	347.149	434.299	Organic acids and derivatives	Carboxylic acids and derivatives	Amino acids, peptides, and analogues	3.86394e+07	3.81579e+07	4.09236e+07	2.7899e+07	3.46676e+07	4.07144e+07	7.84492e+07	1.07203e+08	8.18291e+07	5.85457e+07	6.42318e+07	6.0518e+07	6.51919e+07	7.24382e+07	7.19656e+07
Arginine	175.118	954.381	Organic acids and derivatives	Carboxylic acids and derivatives	Amino acids, peptides, and analogues	1.60341e+09	1.39404e+09	6.91564e+08	1.24963e+09	1.72263e+09	1.15529e+09	7.37167e+08	1.42043e+09	3.15891e+08	9.44923e+08	1.73579e+09	1.79925e+09	9.65944e+08	1.04425e+09	1.04029e+09
Arg-Leu	288.202	643.123	Organic acids and derivatives	Carboxylic acids and derivatives	Amino acids, peptides, and analogues	3.20211e+06	2.96721e+06	3.0582e+06	3.12252e+06	3.13503e+06	2.93271e+06	3.25505e+06	3.20219e+06	3.08755e+06	2.76534e+06	3.1495e+06	3.17367e+06	2.85878e+06	2.99433e+06	2.98816e+06
Asarylaldehyde	169.085	305.288	Benzenoids	Benzene and substituted derivatives	Benzoyl derivatives	5.26437e+06	5.55425e+06	5.40545e+06	4.54718e+06	5.34225e+06	5.44767e+06	1.7336e+07	2.10063e+07	1.68665e+07	9.21045e+06	1.26205e+07	1.15707e+07	1.19704e+07	1.20841e+07	1.29988e+07
Ascomycin	756.45	662.171				1.2383e+06	1.47833e+06	1.47178e+06	1.00278e+06	874637	1.04493e+06	4.30297e+06	5.6161e+06	3.94211e+06	2.7764e+06	2.9808e+06	3.72034e+06	2.5981e+06	2.66342e+06	2.67736e+06
Asn-Asn-Lys	375.223	800.313	Organic acids and derivatives	Carboxylic acids and derivatives	Amino acids, peptides, and analogues	1.03266e+06	1.25581e+06	1.17337e+06	1.29375e+06	2.73586e+06	1.88053e+06	1.95359e+06	2.82342e+06	2.92349e+06	608722	2.88392e+06	1.76268e+06	1.7272e+06	1.75343e+06	2.95361e+06
Asparagine	133.06	753.998	Organic acids and derivatives	Carboxylic acids and derivatives	Amino acids, peptides, and analogues	3.20008e+07	3.00859e+07	3.04102e+07	3.30883e+07	3.23315e+07	3.1244e+07	2.63723e+07	2.90522e+07	2.92237e+07	3.12621e+07	3.18287e+07	3.13323e+07	3.1987e+07	3.19859e+07	3.22548e+07
Asp-Ile-Arg	403.254	446.658	Organic acids and derivatives	Carboxylic acids and derivatives	Amino acids, peptides, and analogues	6.3539e+06	7.03274e+06	5.91041e+06	6.19521e+06	4.99002e+06	5.88504e+06	6.5327e+06	6.19111e+06	4.86483e+06	3.24915e+06	4.91999e+06	5.91661e+06	6.14855e+06	6.43893e+06	6.43295e+06
Astilbin	451.121	352.058	Phenylpropanoids and polyketides	Flavonoids	Flavonoid glycosides	685704	670876	674601	975179	945062	1.077e+06	1.06137e+06	1.37192e+06	1.01808e+06	1.01765e+06	1.21454e+06	1.54012e+06	1.19855e+06	1.21105e+06	1.21117e+06
Astragalin	449.107	433.806	Phenylpropanoids and polyketides	Flavonoids	Flavonoid glycosides	9.2069e+06	8.08507e+06	8.31744e+06	8.16886e+06	8.56832e+06	8.63386e+06	5.57602e+06	7.93589e+06	5.84771e+06	3.97426e+06	6.5754e+06	7.43473e+06	9.18047e+06	9.20103e+06	9.63576e+06
Azatadine	291.194	86.4675				5.97954e+06	9.55203e+06	5.90952e+06	7.71664e+06	8.25236e+06	1.08123e+07	8.98838e+06	6.76468e+06	8.8862e+06	8.02376e+06	8.19898e+06	9.90664e+06	7.46499e+06	7.60534e+06	8.34955e+06
Azelaic acid	135.08	435.18	Lipids and lipid-like molecules	Fatty Acyls	Fatty acids and conjugates	6.63338e+06	6.70001e+06	6.62048e+06	4.76872e+06	5.27199e+06	5.6962e+06	6.79415e+06	7.26625e+06	6.97292e+06	4.54051e+06	7.03688e+06	7.12988e+06	6.45625e+06	6.6617e+06	6.70471e+06
Barbituric acid	129.018	868.876	Organoheterocyclic compounds	Diazines	Pyrimidines and pyrimidine derivatives	1.44159e+08	1.30081e+08	1.07552e+08	1.27781e+08	1.27153e+08	1.35999e+08	1.2644e+08	1.32942e+08	1.39418e+08	8.08609e+07	1.29518e+08	1.06191e+08	1.30347e+08	1.30566e+08	1.35485e+08
Beclomethasone	409.182	260.17	Lipids and lipid-like molecules	Steroids and steroid derivatives	Hydroxysteroids	8.88376e+06	9.67111e+06	1.12326e+07	1.17628e+07	1.5481e+07	1.55548e+07	1.13035e+07	1.3538e+07	1.16338e+07	1.4828e+07	1.54248e+07	1.40724e+07	1.18494e+07	1.19574e+07	1.18724e+07
Benfluorex	374.128	874.525	Benzenoids	Benzene and substituted derivatives	Benzoic acids and derivatives	1.87156e+06	2.26124e+06	2.34253e+06	1.8951e+06	2.77066e+06	2.93145e+06	2.8609e+06	3.47386e+06	3.09317e+06	1.83968e+06	2.83759e+06	3.31385e+06	2.9812e+06	3.09969e+06	3.10025e+06
Benzamide	105.037	134.34	Benzenoids	Benzene and substituted derivatives	Benzoic acids and derivatives	9.18009e+07	9.42742e+07	6.0321e+07	7.23913e+07	4.47061e+07	4.5063e+07	6.53399e+07	6.67056e+07	6.04789e+07	1.02869e+08	7.99156e+07	8.19734e+07	7.70302e+07	7.29973e+07	7.30793e+07
Benzamide, 2-[(2-chloro-4-iodophenyl)amino]-n-(cyclopropylmethoxy)-3,4-difluoro-	265.008	751.406	Benzenoids	Benzene and substituted derivatives	Benzoic acids and derivatives	2.46491e+06	2.68204e+06	2.69497e+06	2.27219e+06	2.23276e+06	2.6148e+06	2.63191e+06	2.88772e+06	2.66979e+06	2.5279e+06	2.68032e+06	2.4701e+06	2.55955e+06	2.66332e+06	2.65829e+06
Benzamide, 2-chloro-5-nitro-n-phenyl-	277.052	760.656	Benzenoids	Benzene and substituted derivatives	Nitrobenzenes	1.76244e+06	1.70778e+06	1.70964e+06	779198	773843	818606	5.06157e+06	5.76759e+06	4.63934e+06	1.99282e+06	2.44967e+06	2.32613e+06	2.41739e+06	2.43514e+06	2.53637e+06
Benzamidine	121.101	362.433				350516	280734	1.1445e+06	609582	387138	424332	536689	2.14571e+06	1.83436e+06	1.47463e+06	717175	2.54155e+06	833176	1.14904e+06	874616
Benzeneacetonitrile, .alpha.-[amino[(4-aminophenyl)thio]methylene]-2-(trifluoromethyl)-	336.095	685.671	Benzenoids	Benzene and substituted derivatives	Trifluoromethylbenzenes	4.38505e+06	4.3013e+06	3.93708e+06	4.80273e+06	4.07527e+06	4.33056e+06	5.37211e+06	6.13181e+06	5.10983e+06	5.3345e+06	4.89276e+06	4.78989e+06	4.3662e+06	4.60772e+06	4.37283e+06
Benzenepropanoic acid, 5-(3-carboxybenzoyl)-2-[[(5e)-6-(4-methoxyphenyl)-5-hexen-1-yl]oxy]-	503.187	411.87	Benzenoids	Benzene and substituted derivatives	Benzophenones	4.68153e+06	4.47962e+06	4.5677e+06	4.78745e+06	4.22191e+06	4.33263e+06	5.01296e+06	5.53837e+06	4.65374e+06	4.72728e+06	4.5686e+06	5.25366e+06	3.28809e+06	3.30257e+06	3.28808e+06
Benzidine	185.114	55.6337	Benzenoids	Benzene and substituted derivatives	Biphenyls and derivatives	3.58117e+06	3.56919e+06	2.76874e+06	3.17206e+06	3.54313e+06	1.52993e+06	2.47089e+06	3.07528e+06	2.35087e+06	3.0082e+06	2.79891e+06	2.21644e+06	2.51949e+06	2.56356e+06	2.51972e+06
Benzimidazole	119.06	77.563				764183	878756	676932	539600	158733	369254	2.83713e+06	4.85926e+06	3.48853e+06	1.23244e+06	1.34393e+06	1.33099e+06	1.28882e+06	1.3448e+06	1.62676e+06
Benzo(b)fluoranthene	252.107	767.571				5.47814e+06	6.03741e+06	5.61696e+06	2.82548e+06	2.88887e+06	3.28439e+06	5.51085e+06	6.21639e+06	5.01497e+06	3.09467e+06	4.34181e+06	4.41941e+06	4.52901e+06	4.77725e+06	4.7638e+06
Benzoic acid	123.044	305.288	Benzenoids	Benzene and substituted derivatives	Benzoic acids and derivatives	7.07999e+06	7.70793e+06	7.21995e+06	6.58893e+06	5.69863e+06	7.88465e+06	2.30829e+07	2.9636e+07	2.35676e+07	1.30817e+07	1.65513e+07	1.877e+07	1.67889e+07	1.79299e+07	1.78556e+07
Benzoic acid, 2-[3-[3-[(5-ethyl-4'-fluoro-2-hydroxy[1,1'-biphenyl]-4-yl)oxy]propoxy]-2-propylphenoxy]-	527.245	380.164	Benzenoids	Benzene and substituted derivatives	Diphenylethers	1.40093e+06	1.17751e+06	1.66604e+06	849711	878621	600507	1.76095e+06	1.74788e+06	1.79939e+06	1.41846e+06	1.63251e+06	1.76936e+06	1.99387e+06	2.18884e+06	2.18516e+06
Benzoylstaurosporine	571.234	478.786	Organoheterocyclic compounds	Indoles and derivatives	Carbazoles	3.90889e+06	4.52405e+06	3.70521e+06	2.56831e+06	2.20042e+06	2.30929e+06	5.98265e+06	6.85418e+06	5.49454e+06	3.81759e+06	7.40405e+06	8.2142e+06	6.89669e+06	5.28269e+06	6.88992e+06
Benzyl alcohol	91.0544	202.326	Benzenoids	Benzene and substituted derivatives	Benzyl alcohols	2.48491e+07	2.51325e+07	2.3212e+07	1.94624e+07	2.07806e+07	1.93153e+07	4.20985e+07	4.74716e+07	4.39627e+07	2.59662e+07	3.31153e+07	3.25341e+07	3.22913e+07	3.23093e+07	3.38322e+07
Benzylamine	91.0544	384.698	Benzenoids	Benzene and substituted derivatives	Phenylmethylamines	4.40705e+06	4.62368e+06	4.24879e+06	5.57278e+06	5.19114e+06	5.63462e+06	5.90803e+06	5.81041e+06	6.04617e+06	6.03561e+06	6.42641e+06	7.11299e+06	5.88839e+06	5.91837e+06	5.99971e+06
Bergaptol	203.052	452.2	Phenylpropanoids and polyketides	Coumarins and derivatives	Furanocoumarins	3.31659e+09	4.87759e+09	4.68326e+09	4.81131e+09	5.03623e+09	5.35051e+09	6.12033e+09	4.92543e+09	4.46817e+09	3.13111e+09	4.85102e+09	4.62415e+09	4.2743e+09	3.91436e+09	4.27401e+09
Beta-alanine	90.0552	666.095	Organic acids and derivatives	Carboxylic acids and derivatives	Amino acids, peptides, and analogues	4.2521e+07	4.18336e+07	4.261e+07	4.27903e+07	4.1657e+07	4.29068e+07	4.24605e+07	3.5483e+07	3.46564e+07	3.68205e+07	4.17879e+07	4.23878e+07	4.15117e+07	4.15588e+07	4.23061e+07
.beta.-chloro-d-alanine	124	714.998	Organic acids and derivatives	Carboxylic acids and derivatives	Amino acids, peptides, and analogues	3.66026e+06	3.5778e+06	3.42557e+06	3.05723e+06	2.69009e+06	2.89344e+06	3.58975e+06	3.98356e+06	3.5226e+06	3.08665e+06	3.79963e+06	3.28503e+06	3.41325e+06	3.57703e+06	3.56609e+06
.beta.-cyano-l-alanine	115.039	522.39	Organic acids and derivatives	Carboxylic acids and derivatives	Amino acids, peptides, and analogues	9.52207e+06	9.60692e+06	1.04388e+07	1.96243e+07	1.9551e+07	2.11592e+07	6.88278e+06	7.33e+06	6.87823e+06	1.4217e+07	1.605e+07	1.66452e+07	1.49228e+07	1.493e+07	1.51117e+07
.beta.-damascone	137.096	423.827	Organic oxygen compounds	Organooxygen compounds	Carbonyl compounds	3.34117e+06	3.61624e+06	3.32964e+06	2.95351e+06	2.82389e+06	3.11376e+06	5.22858e+06	1.0261e+07	6.83953e+06	5.71502e+06	6.08443e+06	6.97915e+06	5.26052e+06	5.28614e+06	5.49307e+06
Beta-echinenone	551.424	49.7961	Lipids and lipid-like molecules	Prenol lipids	Tetraterpenoids	1.12945e+07	9.73432e+06	8.35837e+06	6.7204e+06	5.37147e+06	7.33583e+06	1.11898e+07	1.05625e+07	1.16368e+07	8.75122e+06	7.84124e+06	6.50536e+06	1.09925e+07	1.09932e+07	1.11911e+07
Beta-estradiol	159.091	117.463	Lipids and lipid-like molecules	Steroids and steroid derivatives	Estrane steroids	7.55398e+07	6.93026e+07	7.04196e+07	1.41568e+08	2.68796e+07	6.79738e+07	7.70647e+07	9.70572e+07	6.82196e+07	6.97667e+07	1.14597e+08	1.03508e+08	6.74043e+07	7.06385e+07	7.14505e+07
.beta.-estradiol 17-valerate	357.248	1004.94	Lipids and lipid-like molecules	Steroids and steroid derivatives	Steroid esters	4.24233e+07	4.6687e+07	4.32835e+07	4.97506e+07	3.27097e+07	5.38959e+07	5.90863e+07	7.11081e+07	6.02922e+07	5.30248e+07	5.78517e+07	7.09922e+07	5.55447e+07	5.55529e+07	5.75797e+07
.beta.-Homoproline	130.086	496.932				2.09995e+06	1.85885e+06	2.19406e+06	3.29592e+06	2.22078e+06	2.26755e+06	1.96334e+06	2.55863e+06	2.29781e+06	2.51749e+06	2.3718e+06	2.64685e+06	2.44685e+06	2.44675e+06	2.42967e+06
Betaine	118.086	480.861	Organic acids and derivatives	Carboxylic acids and derivatives	Amino acids, peptides, and analogues	1.16874e+08	1.15983e+08	1.18676e+08	1.3095e+08	1.1451e+08	1.28299e+08	1.82827e+08	1.93641e+08	1.78324e+08	1.56877e+08	1.73235e+08	1.83544e+08	1.50485e+08	1.54796e+08	1.54787e+08
.beta.-naphthol	145.049	349.642	Benzenoids	Naphthalenes	Naphthols and derivatives	7.97024e+06	8.25058e+06	8.0733e+06	7.09172e+06	5.22422e+06	5.6623e+06	1.47321e+07	1.62024e+07	1.47625e+07	8.97197e+06	1.03135e+07	1.09038e+07	8.20783e+06	8.20571e+06	8.07422e+06
.beta.-nicotinamide adenine dinucleotide(NAD)	664.114	823.151				3.0459e+06	2.91434e+06	3.37741e+06	1.16702e+06	2.4257e+06	2.52242e+06	4.38323e+06	7.10792e+06	4.48052e+06	1.89756e+06	3.63835e+06	3.49405e+06	3.67803e+06	3.68475e+06	3.81811e+06
.beta.-sitosterol	397.382	103.507	Lipids and lipid-like molecules	Steroids and steroid derivatives	Stigmastanes and derivatives	6.19033e+07	6.55978e+07	5.54005e+07	5.5572e+07	3.09546e+07	3.99741e+07	6.79633e+07	6.80368e+07	6.57411e+07	6.43012e+07	4.82632e+07	4.74192e+07	4.26209e+07	4.26274e+07	4.06927e+07
Betonicine	160.096	542.798	Organic acids and derivatives	Carboxylic acids and derivatives	Amino acids, peptides, and analogues	1.18024e+07	1.14514e+07	1.23154e+07	1.49446e+07	1.24375e+07	1.49926e+07	1.44969e+07	1.50981e+07	1.36196e+07	9.31408e+06	1.4709e+07	1.58574e+07	1.66518e+07	1.66968e+07	1.77118e+07
Bis(2-ethylhexyl) adipate	371.314	69.9082	Lipids and lipid-like molecules	Fatty Acyls	Fatty acid esters	1.25351e+07	1.29979e+07	1.37258e+07	1.39083e+07	1.30183e+07	1.31802e+07	1.30454e+07	1.57077e+07	1.35774e+07	1.50677e+07	1.6013e+07	1.51188e+07	1.3212e+07	1.34653e+07	1.34657e+07
Brassicasterol	255.21	103.544	Lipids and lipid-like molecules	Steroids and steroid derivatives	Ergostane steroids	5.25342e+06	5.57189e+06	4.49589e+06	3.3699e+06	1.90895e+06	3.28224e+06	5.93575e+06	6.10501e+06	6.00148e+06	6.26628e+06	4.92206e+06	4.68172e+06	3.56269e+06	3.50743e+06	3.40661e+06
Bromobutide	193.997	549.304	Benzenoids	Benzene and substituted derivatives	Phenylpropanes	2.17511e+07	2.26521e+07	2.04668e+07	2.89988e+07	2.76452e+07	2.89476e+07	1.86546e+07	2.20288e+07	1.73843e+07	2.54889e+07	2.57054e+07	2.73316e+07	2.63069e+07	2.7521e+07	2.74604e+07
Bufalin	351.252	51.7477	Lipids and lipid-like molecules	Steroids and steroid derivatives	Steroid lactones	4.59669e+06	5.0532e+06	4.5794e+06	6.72463e+06	5.68805e+06	6.46989e+06	9.59666e+06	1.73321e+07	1.11217e+07	5.06387e+06	5.40947e+06	4.14551e+06	6.17638e+06	6.18639e+06	6.22901e+06
Bufotenine	160.076	117.808	Organoheterocyclic compounds	Indoles and derivatives	Tryptamines and derivatives	1.12815e+07	1.16272e+07	1.23344e+07	1.72711e+07	4.80202e+06	8.90905e+06	1.15288e+07	1.09664e+07	1.14084e+07	1.09314e+07	1.50622e+07	1.23442e+07	1.08361e+07	1.14778e+07	1.14171e+07
Butanoic acid	89.06	56.0376	Lipids and lipid-like molecules	Fatty Acyls	Fatty acids and conjugates	1.91214e+07	1.9371e+07	1.39247e+07	1.98967e+07	1.96613e+07	1.22335e+07	2.06423e+07	1.88108e+07	1.614e+07	1.87038e+07	1.90005e+07	2.12669e+07	1.92869e+07	2.00142e+07	1.99954e+07
Butein	237.034	615.447	Phenylpropanoids and polyketides	Linear 1,3-diarylpropanoids	Chalcones and dihydrochalcones	1.63343e+07	1.80095e+07	1.73078e+07	1.74131e+07	1.70937e+07	1.69807e+07	2.08376e+07	2.11575e+07	1.99956e+07	1.29164e+07	1.88056e+07	1.76747e+07	1.72636e+07	1.75221e+07	1.85121e+07
Butylated hydroxytoluene	243.185	99.739	Benzenoids	Benzene and substituted derivatives	Phenylpropanes	4.47373e+06	4.45281e+06	3.39139e+06	2.82127e+06	2.18806e+06	3.53717e+06	8.52332e+06	8.05522e+06	7.61904e+06	2.83731e+06	2.8844e+06	3.5153e+06	4.14642e+06	3.96678e+06	3.96701e+06
C17-sphinganine	288.289	57.9583	Organic nitrogen compounds	Organonitrogen compounds	Amines	3.97503e+06	5.23707e+06	2.63365e+06	4.21686e+06	2.38846e+06	7.75091e+06	2.47336e+06	2.14416e+06	1.64881e+06	1.07055e+06	462985	1.55555e+06	7.26129e+06	7.36696e+06	7.78229e+06
Caffeate	181.033	315.399	Phenylpropanoids and polyketides	Cinnamic acids and derivatives	Hydroxycinnamic acids and derivatives	9.45928e+06	3.18175e+07	3.40641e+07	1.86097e+07	3.66016e+07	4.37251e+07	1.80334e+07	2.1434e+07	3.42777e+06	2.27835e+07	2.03774e+07	2.27642e+07	1.42562e+07	2.02503e+07	2.00627e+07
Cannabinol	293.21	165.455	Organoheterocyclic compounds	Benzopyrans	1-benzopyrans	6.56395e+06	1.72276e+07	6.39431e+06	8.94947e+06	7.68045e+06	8.58802e+06	9.40581e+06	7.70616e+06	9.98437e+06	7.37046e+06	1.12949e+07	6.21245e+06	9.6693e+06	1.47802e+07	1.1154e+07
Captopril	218.102	725.044	Organic acids and derivatives	Carboxylic acids and derivatives	Amino acids, peptides, and analogues	4.0206e+06	4.11233e+06	4.17323e+06	4.51062e+06	3.7867e+06	4.41692e+06	3.94874e+06	4.48454e+06	3.85559e+06	4.44823e+06	3.47667e+06	3.47481e+06	3.77795e+06	3.81012e+06	3.78767e+06
Castanospermine	190.125	55.5326				3.76066e+06	3.72702e+06	4.36138e+06	4.08549e+06	2.64973e+06	3.54434e+06	8.88452e+06	8.32703e+06	8.49233e+06	3.336e+06	4.51554e+06	4.52953e+06	6.31808e+06	6.508e+06	6.50316e+06
Catalposide	465.136	359.995	Organic oxygen compounds	Organooxygen compounds	Carbohydrates and carbohydrate conjugates	1.21164e+06	1.06102e+06	1.05176e+06	2.71907e+06	2.69031e+06	2.6499e+06	1.92467e+06	2.57085e+06	1.5742e+06	2.13069e+06	2.65459e+06	2.59977e+06	2.64769e+06	2.89498e+06	2.87572e+06
(+)-catechin	291.068	727.093	Phenylpropanoids and polyketides	Flavonoids	Flavans	1.55325e+07	1.60967e+07	1.61868e+07	1.52259e+07	1.16936e+07	1.24973e+07	1.97365e+07	2.21768e+07	1.88261e+07	1.9681e+07	1.81527e+07	1.80801e+07	1.51535e+07	1.53757e+07	1.53761e+07
Cedrol	135.116	198.609	Lipids and lipid-like molecules	Prenol lipids	Sesquiterpenoids	4.19772e+07	4.14574e+07	4.05213e+07	9.14304e+07	5.76351e+07	4.13579e+07	5.17188e+07	7.57399e+07	4.87507e+07	1.00434e+08	5.38945e+07	1.24089e+08	4.61326e+07	4.61147e+07	4.90282e+07
Cellobiose	325.112	521.548	Organic oxygen compounds	Organooxygen compounds	Carbohydrates and carbohydrate conjugates	3.15881e+07	3.34246e+07	3.1954e+07	8.86901e+07	8.76164e+07	9.44212e+07	1.5969e+07	1.91965e+07	1.58301e+07	5.1231e+07	6.30061e+07	5.96742e+07	5.86941e+07	5.9813e+07	6.02368e+07
Cetaben	362.325	105.362	Benzenoids	Benzene and substituted derivatives	Benzoic acids and derivatives	4.19888e+06	4.56213e+06	1.88442e+06	2.83221e+06	3.44446e+06	1.30224e+06	1.82122e+06	1.38048e+06	1.13347e+06	713365	615955	525972	1.63883e+06	1.62877e+06	1.49327e+06
Chenodeoxycholate	393.285	50.5841	Lipids and lipid-like molecules	Steroids and steroid derivatives	Bile acids, alcohols and derivatives	6.06781e+07	6.69286e+07	7.59277e+07	5.47313e+07	7.68786e+07	8.12254e+07	6.14905e+07	7.22203e+07	6.76024e+07	7.01932e+07	5.83327e+07	7.25673e+07	1.06746e+08	1.06917e+08	1.09608e+08
Chlorhexidine	505.224	502.497	Benzenoids	Benzene and substituted derivatives	Halobenzenes	1.34463e+06	1.53867e+06	1.39827e+06	929015	868509	981413	1.96714e+06	2.44027e+06	1.97435e+06	1.00703e+06	1.52892e+06	1.87719e+06	1.97341e+06	2.03116e+06	2.03465e+06
Chlorimuron ethyl	185.998	588.754	Organic nitrogen compounds	Organonitrogen compounds	Sulfonylureas	1.44825e+07	1.34735e+07	1.5074e+07	1.9005e+07	6.34656e+06	1.08304e+07	1.40793e+07	1.42591e+07	1.42996e+07	1.43099e+07	1.86896e+07	1.68511e+07	1.27231e+07	1.34201e+07	1.34115e+07
Chlormadinone acetate	405.172	367.6	Lipids and lipid-like molecules	Steroids and steroid derivatives	Pregnane steroids	2.28429e+06	2.10152e+06	2.23006e+06	2.56419e+06	2.50556e+06	3.13491e+06	2.50028e+06	3.37894e+06	2.359e+06	3.36893e+06	2.99829e+06	3.65106e+06	2.76392e+06	2.76641e+06	2.85251e+06
Chlorophacinone	357.055	823.151	Benzenoids	Benzene and substituted derivatives	Diphenylmethanes	2.30018e+06	2.36598e+06	2.36945e+06	2.43851e+06	2.34606e+06	2.65007e+06	1.79618e+06	2.31962e+06	1.75198e+06	1.98055e+06	2.45619e+06	2.47822e+06	2.26835e+06	2.39378e+06	2.3897e+06
Chlorzoxazone	170.024	613.424	Organoheterocyclic compounds	Benzoxazoles	Benzoxazolones	3.12311e+06	2.98925e+06	3.04714e+06	2.78184e+06	1.6563e+06	1.9119e+06	2.74505e+06	2.76158e+06	2.7796e+06	5.34513e+06	3.93007e+06	3.83515e+06	2.47167e+06	2.64169e+06	2.63304e+06
Cholesterol	369.35	105.124	Lipids and lipid-like molecules	Steroids and steroid derivatives	Cholestane steroids	3.28336e+06	3.50119e+06	2.96788e+06	3.28055e+06	1.64513e+06	2.63514e+06	3.56525e+06	3.71013e+06	3.57983e+06	3.91576e+06	3.37997e+06	3.50342e+06	2.63946e+06	2.8141e+06	2.63541e+06
Choline	104.107	458.324	Organic nitrogen compounds	Organonitrogen compounds	Quaternary ammonium salts	2.13712e+10	1.54435e+10	2.00608e+10	1.96811e+10	1.63694e+10	2.07681e+10	2.13448e+10	2.49406e+10	1.91347e+10	1.52904e+10	2.19916e+10	1.84905e+10	1.89045e+10	1.95984e+10	1.90983e+10
Cimifugin	307.099	634.108	Organoheterocyclic compounds	Benzopyrans	1-benzopyrans	3.52183e+07	3.52823e+07	3.42769e+07	3.96668e+07	3.62561e+07	3.84362e+07	4.1009e+07	4.19164e+07	4.19103e+07	4.45192e+07	4.12093e+07	4.12119e+07	4.21834e+07	4.22544e+07	4.41144e+07
Cinnamoyl putrescin	219.148	415.187	Phenylpropanoids and polyketides	Cinnamic acids and derivatives	Cinnamic acid amides	7.40533e+07	6.72467e+07	6.98075e+07	3.26335e+07	3.14212e+07	3.20015e+07	1.06045e+08	1.13802e+08	9.30243e+07	3.73375e+07	4.39531e+07	3.92735e+07	6.96158e+07	7.12857e+07	7.39658e+07
Cinnavalininate	301.042	760.656	Organoheterocyclic compounds	Benzoxazines	Phenoxazines	1.58531e+07	1.65206e+07	1.5449e+07	1.87648e+07	1.80447e+07	1.93318e+07	1.84695e+07	1.88543e+07	1.90727e+07	1.50383e+07	1.91895e+07	1.76182e+07	1.80157e+07	1.81565e+07	1.92158e+07
Cinobufagin	443.232	257.031	Lipids and lipid-like molecules	Steroids and steroid derivatives	Steroid lactones	46988.8	7.00517e+06	5.02503e+07	5.93252e+07	1.19322e+07	590215	1.80869e+07	3.02978e+06	475794	1.44097e+07	1.74564e+07	1.77311e+07	1.47935e+07	1.47943e+07	1.47076e+07
Cinosulfuron	436.108	34.4915	Benzenoids	Benzene and substituted derivatives	Benzenesulfonamides	31189.3	26225.9	63673.6	75380.5	108437	4.04181e+06	51082.5	8723.07	60784.8	15950.3	23633.6	23288.7	104502	104555	106243
Cis-4-hydroxy-l-proline	114.055	441.382	Organic acids and derivatives	Carboxylic acids and derivatives	Amino acids, peptides, and analogues	1.17832e+07	2.70523e+07	2.4783e+07	2.53911e+07	1.47721e+07	2.71264e+07	3.13377e+07	3.46491e+07	2.88408e+07	2.2604e+07	2.69555e+07	1.2533e+07	2.56785e+07	2.56443e+07	2.44342e+07
Clindamycin	425.177	315.839	Organic acids and derivatives	Carboxylic acids and derivatives	Amino acids, peptides, and analogues	3.04613e+06	3.03594e+06	3.13937e+06	3.35588e+06	4.92578e+06	4.90623e+06	3.46664e+06	4.54747e+06	3.51525e+06	5.71093e+06	4.42173e+06	6.48033e+06	4.90296e+06	4.90354e+06	5.08471e+06
Clobetasol propionate	467.188	597.563	Lipids and lipid-like molecules	Steroids and steroid derivatives	Pregnane steroids	4.25652e+06	3.7167e+06	4.07069e+06	3.7745e+06	2.99495e+06	1.76801e+06	5.16241e+06	5.65964e+06	4.86881e+06	5.4449e+06	5.29472e+06	5.36577e+06	2.91206e+06	2.70019e+06	2.70719e+06
Codeine-6-.beta.-d-glucuronide	498.172	264.296				6.51166e+06	6.00469e+06	1.2388e+07	1.25327e+07	2.01078e+07	1.45333e+07	7.85107e+06	8.57308e+06	8.00318e+06	1.02554e+07	1.09678e+07	1.20518e+07	1.3703e+07	1.29302e+07	1.36473e+07
Conessine	357.31	392.901	Lipids and lipid-like molecules	Steroids and steroid derivatives	Steroidal alkaloids	2.64613e+06	3.40073e+06	3.19809e+06	2.41247e+06	2.70194e+06	2.62137e+06	3.55218e+06	4.33978e+06	3.63442e+06	3.5728e+06	3.71498e+06	4.00175e+06	3.52719e+06	3.71396e+06	3.7078e+06
Coniferyl alcohol	163.075	250.513	Benzenoids	Phenols	Methoxyphenols	1.05488e+07	1.28572e+07	1.09904e+07	1.15938e+07	1.35322e+07	9.65658e+06	1.77282e+07	2.55977e+07	2.18957e+07	1.08626e+07	1.27968e+07	1.457e+07	1.31848e+07	1.2483e+07	1.26678e+07
(-)-corey lactone diol	345.133	426.096	Organoheterocyclic compounds	Lactones	Gamma butyrolactones	1.58854e+07	2.02955e+07	2.13781e+07	1.10814e+07	2.98321e+07	3.04512e+07	3.21805e+07	2.93821e+07	3.35906e+07	2.83329e+07	2.61242e+07	2.77511e+07	2.70715e+07	2.90613e+07	3.29846e+07
Cortodoxone	293.21	342.649	Lipids and lipid-like molecules	Steroids and steroid derivatives	Hydroxysteroids	2.20353e+06	3.78458e+06	2.29555e+06	3.1895e+06	2.55291e+06	2.11296e+06	4.81064e+06	2.24668e+06	4.99119e+06	4.085e+06	3.26707e+06	2.64546e+06	3.51156e+06	3.34554e+06	3.35619e+06
Costunolide	187.144	856.917	Lipids and lipid-like molecules	Prenol lipids	Terpene lactones	6.69516e+06	6.73747e+06	5.71861e+06	7.12242e+06	7.28536e+06	7.42939e+06	9.08536e+06	1.06347e+07	9.62067e+06	7.02579e+06	8.31139e+06	8.30538e+06	7.62979e+06	7.28217e+06	7.27587e+06
Coumaroyl agmatine (isomer of 1297)	277.165	435.348	Phenylpropanoids and polyketides	Cinnamic acids and derivatives	Hydroxycinnamic acids and derivatives	3.19915e+06	3.75513e+06	2.7359e+06	4.20421e+06	3.59417e+06	5.72715e+06	2.57596e+06	3.17374e+06	2.77739e+06	3.73248e+06	3.40491e+06	3.40697e+06	3.86273e+06	3.87878e+06	4.12263e+06
Coumaroyl putrescin	235.144	447.22	Phenylpropanoids and polyketides	Cinnamic acids and derivatives	Hydroxycinnamic acids and derivatives	1.50702e+07	1.40359e+07	1.41816e+07	9.65911e+06	1.01738e+07	1.01533e+07	1.29745e+07	1.33576e+07	1.48531e+07	1.17957e+07	1.36574e+07	1.41762e+07	1.383e+07	1.4561e+07	1.4123e+07
Coumaroyl tyramine	284.127	276.298	Phenylpropanoids and polyketides	Cinnamic acids and derivatives	Hydroxycinnamic acids and derivatives	3.36252e+07	3.92067e+07	3.39057e+07	5.40396e+07	4.81278e+07	4.87308e+07	5.13582e+07	6.45105e+07	5.85965e+07	4.80125e+07	4.89848e+07	5.02592e+07	4.61319e+07	4.62551e+07	4.65238e+07
Creatinine	114.091	569.78	Organic acids and derivatives	Carboxylic acids and derivatives	Amino acids, peptides, and analogues	1.74126e+07	1.83294e+07	1.72626e+07	2.07054e+07	1.5121e+07	1.73534e+07	2.09375e+07	2.02841e+07	2.01635e+07	2.57139e+07	2.45359e+07	2.33064e+07	1.69776e+07	1.69751e+07	1.671e+07
Cuminyl alcohol	105.07	305.483	Lipids and lipid-like molecules	Prenol lipids	Monoterpenoids	1.30005e+07	1.55013e+07	1.60993e+07	1.60344e+07	1.34027e+07	1.62438e+07	1.47969e+07	1.72959e+07	1.54404e+07	1.20719e+07	1.25113e+07	1.39601e+07	1.47909e+07	1.54342e+07	1.5426e+07
Cyanazine	263.073	627.996	Organoheterocyclic compounds	Triazines	Aminotriazines	4.04e+07	3.97269e+07	3.82306e+07	4.08497e+07	3.55161e+07	3.8631e+07	4.11485e+07	4.50104e+07	4.11734e+07	4.04703e+07	4.03314e+07	3.98803e+07	4.04924e+07	4.11328e+07	4.16434e+07
Cycloheximide	246.155	761.784	Organoheterocyclic compounds	Pyridines and derivatives	Hydropyridines	1.41401e+07	1.4884e+07	1.46999e+07	1.43146e+07	1.56053e+07	1.54114e+07	1.44643e+07	1.48653e+07	1.34707e+07	8.99249e+06	1.28613e+07	1.53132e+07	1.46774e+07	1.49668e+07	1.51489e+07
Cyclohexylamine	100.112	431.436	Organic nitrogen compounds	Organonitrogen compounds	Cyclohexylamines	6.80362e+06	7.13327e+06	6.26733e+06	5.237e+06	5.66923e+06	4.87033e+06	8.16613e+06	1.0487e+07	8.55783e+06	8.09e+06	1.02884e+07	9.94011e+06	8.50093e+06	8.50014e+06	8.59096e+06
Cyclopentolate	274.186	649.993				9.14349e+06	8.60771e+06	8.90734e+06	9.08884e+06	6.5399e+06	6.68276e+06	8.85142e+06	8.31314e+06	8.96048e+06	9.11979e+06	9.0332e+06	9.59531e+06	8.55235e+06	9.01485e+06	8.98361e+06
Cyhexatin	367.157	632.572	Organometallic compounds	Organo-post-transition metal compounds	Organotin compounds	4.06474e+06	4.11444e+06	3.52971e+06	5.09099e+06	4.27497e+06	4.90448e+06	4.32006e+06	4.49574e+06	2.96672e+06	3.03169e+06	4.64133e+06	4.71591e+06	4.45822e+06	4.59669e+06	4.58762e+06
Cynarin	163.039	376.156	Organic oxygen compounds	Organooxygen compounds	Alcohols and polyols	5.97474e+06	6.11708e+06	6.64946e+06	3.76563e+06	4.3163e+06	3.27115e+06	8.60162e+06	1.0042e+07	9.62708e+06	5.6762e+06	7.76572e+06	5.80211e+06	7.54202e+06	7.94734e+06	7.94081e+06
Cypermethrin	435.125	349.426	Lipids and lipid-like molecules	Fatty Acyls	Fatty acid esters	3.16377e+06	3.1964e+06	3.10638e+06	4.82135e+06	4.64967e+06	5.94846e+06	4.03298e+06	5.27296e+06	3.86035e+06	6.27105e+06	6.30632e+06	8.19388e+06	4.70853e+06	4.70847e+06	4.50014e+06
Cys-Trp-Arg	464.188	763.271	Organic acids and derivatives	Carboxylic acids and derivatives	Amino acids, peptides, and analogues	6.13438e+06	5.84624e+06	5.57694e+06	5.80642e+06	5.76102e+06	6.16884e+06	5.87572e+06	5.85604e+06	5.78813e+06	4.96971e+06	5.79772e+06	5.99969e+06	5.87222e+06	5.9062e+06	6.14793e+06
Cys-Tyr-Arg	441.211	378.198	Organic acids and derivatives	Carboxylic acids and derivatives	Amino acids, peptides, and analogues	130562	136259	144294	206527	177412	250867	1.05398e+06	1.62273e+06	1.1135e+06	1.24855e+06	2.09819e+06	2.26675e+06	950152	1.02582e+06	1.02494e+06
Cytidine 5'-monophosphate	324.058	869.884	Nucleosides, nucleotides, and analogues	Pyrimidine nucleotides	Pyrimidine ribonucleotides	1.10938e+07	1.09057e+07	1.05822e+07	8.32066e+06	8.23859e+06	9.40826e+06	1.29962e+07	1.78265e+07	1.37019e+07	7.85953e+06	1.09293e+07	1.12725e+07	1.19362e+07	1.31427e+07	1.31423e+07
Cytisine	191.142	51.3977	Alkaloids and derivatives	Lupin alkaloids	Cytisine and derivatives	1.61435e+07	1.10656e+07	8.66945e+06	1.09017e+07	7.51753e+06	1.595e+07	3.81889e+06	7.0294e+06	9.08163e+06	5.98778e+06	7.01175e+06	6.38153e+06	1.05886e+07	1.07489e+07	1.07875e+07
Cytosine	112.051	802.313	Organoheterocyclic compounds	Diazines	Pyrimidines and pyrimidine derivatives	3.09195e+06	2.80617e+06	2.71073e+06	2.81193e+06	2.53456e+06	4.04102e+06	3.03065e+06	3.46425e+06	2.98183e+06	2.59332e+06	3.00154e+06	3.65991e+06	2.92644e+06	3.03186e+06	3.0346e+06
Dacarbazine	183.076	181.435	Organic acids and derivatives	Carboxylic acids and derivatives	Carboxylic acid derivatives	7.71661e+06	7.58042e+06	7.38697e+06	9.92931e+06	4.03925e+06	5.96327e+06	1.00815e+07	8.7809e+06	8.08993e+06	8.04368e+06	1.21757e+07	1.03196e+07	7.43104e+06	7.65671e+06	7.64967e+06
D-.alpha.-cyclohexylglycine	112.12	651.586	Organic acids and derivatives	Carboxylic acids and derivatives	Amino acids, peptides, and analogues	4.75463e+06	5.54446e+06	4.69758e+06	3.91943e+06	6.76224e+06	7.00985e+06	6.60252e+06	5.89779e+06	7.22272e+06	4.34676e+06	4.59346e+06	5.87283e+06	5.30324e+06	5.22934e+06	5.22149e+06
Demeton s	281.047	1155.32				5.99226e+06	7.07752e+06	5.22476e+06	6.29589e+06	6.77058e+06	5.26514e+06	6.49779e+06	7.91636e+06	4.27862e+06	6.28242e+06	7.2879e+06	6.86797e+06	1.99372e+07	2.03295e+07	2.03232e+07
Deoxyadenosine	252.108	234.221	Nucleosides, nucleotides, and analogues	Purine nucleosides	Purine 2'-deoxyribonucleosides	1.44052e+07	1.42746e+07	1.21895e+07	1.58193e+07	1.51268e+07	1.09859e+07	1.44859e+07	1.71209e+07	1.54323e+07	1.22963e+07	1.55135e+07	1.01845e+07	1.60195e+07	1.60424e+07	1.71699e+07
D-erythro-imidazolylglycerol phosphate	111.055	111.407	Organic acids and derivatives	Organic phosphoric acids and derivatives	Phosphate esters	1.63587e+08	1.70641e+08	1.3266e+08	1.16939e+08	1.68559e+08	6.54612e+07	1.58177e+08	1.72885e+08	1.53909e+08	1.11532e+08	1.94009e+08	1.9201e+08	1.69966e+08	1.68804e+08	1.59307e+08
Dextromethorphan	272.185	444.098				6.32098e+06	6.20452e+06	6.02233e+06	7.31873e+06	7.71462e+06	8.07941e+06	7.45088e+06	8.28402e+06	8.2121e+06	7.32066e+06	8.20186e+06	8.31525e+06	8.20124e+06	8.39186e+06	8.38749e+06
D-glucosamine 6-phosphate	260.073	661.117	Organic oxygen compounds	Organooxygen compounds	Carbohydrates and carbohydrate conjugates	4.30855e+06	4.52806e+06	4.41859e+06	4.9283e+06	3.519e+06	3.68296e+06	5.32869e+06	5.60529e+06	5.04968e+06	6.53047e+06	5.84123e+06	5.7338e+06	4.17419e+06	4.33314e+06	4.16814e+06
D-glucosaminic acid	196.063	305.922	Organic acids and derivatives	Carboxylic acids and derivatives	Amino acids, peptides, and analogues	1.05045e+06	1.13751e+06	1.02413e+06	3.29099e+06	2.76183e+06	2.61958e+06	1.24911e+07	1.19055e+07	1.2724e+07	2.76647e+06	3.09231e+06	3.40405e+06	5.31844e+06	5.33869e+06	5.51463e+06
D-glucose 6-phosphate	243.026	751.296	Organic oxygen compounds	Organooxygen compounds	Carbohydrates and carbohydrate conjugates	1.194e+07	1.28175e+07	1.16109e+07	1.16112e+07	1.22634e+07	1.30423e+07	1.28287e+07	1.28134e+07	1.22033e+07	1.02782e+07	1.28841e+07	1.22505e+07	1.18545e+07	1.23248e+07	1.23101e+07
D-glutamine	147.076	682.76	Organic acids and derivatives	Carboxylic acids and derivatives	Amino acids, peptides, and analogues	5.03435e+09	4.88739e+09	4.71089e+09	5.08886e+09	5.22657e+09	5.30503e+09	4.93454e+09	5.50585e+09	5.1107e+09	4.78601e+09	5.6107e+09	5.80512e+09	5.48212e+09	5.48384e+09	5.53715e+09
Diacetyl	87.0443	678.363	Organic oxygen compounds	Organooxygen compounds	Carbonyl compounds	8.85177e+08	9.09252e+08	8.36747e+08	9.21006e+08	9.20343e+08	9.10525e+08	9.27852e+08	9.11548e+08	9.2413e+08	7.6057e+08	9.19512e+08	9.25542e+08	9.06414e+08	9.07699e+08	9.21639e+08
Dibutyl adipate	259.19	69.9082	Lipids and lipid-like molecules	Fatty Acyls	Fatty acid esters	2.02973e+06	2.74422e+06	2.39768e+06	2.4107e+06	2.4323e+06	2.30718e+06	2.24504e+06	2.67359e+06	2.16317e+06	2.59784e+06	2.55623e+06	2.48337e+06	2.22284e+06	2.28077e+06	2.27856e+06
Dibutyl phthalate	317.12	635.157	Benzenoids	Benzene and substituted derivatives	Benzoic acids and derivatives	5.48447e+06	5.34896e+06	7.07694e+06	4.27089e+06	3.27995e+06	3.62414e+06	5.87566e+06	6.81289e+06	5.98804e+06	6.09781e+06	6.16837e+06	5.81451e+06	5.39287e+06	5.41514e+06	6.37942e+06
Dichlormid	210.037	732.909	Organic acids and derivatives	Carboxylic acids and derivatives	Carboxylic acid derivatives	6.26603e+06	6.0703e+06	6.03752e+06	4.77814e+06	3.7187e+06	3.92024e+06	1.67582e+07	1.88299e+07	1.56498e+07	9.76695e+06	1.06644e+07	1.02679e+07	8.56691e+06	8.78162e+06	8.78193e+06
Dicyclohexylamine	182.19	216.796	Organic nitrogen compounds	Organonitrogen compounds	Cyclohexylamines	2.95849e+07	3.85838e+07	3.49297e+07	2.97402e+07	2.72928e+07	2.29112e+07	3.73819e+07	3.04775e+07	3.73089e+07	3.25856e+07	3.14212e+07	3.15658e+07	3.18681e+07	2.91416e+07	3.1832e+07
Diethylene glycol hexyl ether	191.142	126.046	Organic oxygen compounds	Organooxygen compounds	Ethers	1.15614e+08	5.66216e+06	1.24933e+08	8.83962e+06	9.59393e+06	1.34599e+07	1.75567e+08	4.90539e+06	1.61476e+08	8.82476e+06	7.37141e+06	1.41151e+07	7.89167e+06	7.1891e+06	7.07689e+06
Diethylene glycol monobutyl ether	163.132	194.323	Organic oxygen compounds	Organooxygen compounds	Ethers	1.16571e+07	1.22627e+07	1.10294e+07	1.18601e+07	1.80292e+07	1.37348e+07	4.52974e+07	4.36251e+07	3.45092e+07	6.602e+07	7.73985e+07	8.52112e+07	3.19007e+07	3.26818e+07	3.19007e+07
Digalacturonic acid	388.107	941.581				3.60863e+06	3.4816e+06	2.80779e+06	1.53696e+06	5.3633e+06	4.56952e+06	1.37836e+07	1.66161e+07	9.17801e+06	2.14913e+06	5.26279e+06	7.0643e+06	6.55711e+06	6.98116e+06	6.95219e+06
(+)-dihydrocervone	153.127	198.686	Lipids and lipid-like molecules	Prenol lipids	Monoterpenoids	1.50433e+07	1.59615e+07	1.56894e+07	1.34479e+07	2.03461e+07	1.81428e+07	1.77539e+07	2.66291e+07	2.03934e+07	1.81844e+07	1.83612e+07	1.77808e+07	1.80317e+07	1.75056e+07	1.8006e+07
Dihydroconiferyl alcohol	165.09	253.499	Benzenoids	Phenols	Methoxyphenols	1.14391e+07	1.2105e+07	1.15758e+07	1.02039e+07	1.01148e+07	8.53933e+06	2.97784e+07	3.52959e+07	2.91049e+07	1.41346e+07	1.6707e+07	1.73338e+07	1.5858e+07	1.57372e+07	1.61498e+07
Dihydrohaloperidol	360.149	855.935	Organoheterocyclic compounds	Piperidines	Phenylpiperidines	2.51035e+06	2.72901e+06	2.58901e+06	2.78328e+06	2.59429e+06	2.44739e+06	2.50745e+06	2.51995e+06	2.74626e+06	1.82275e+06	2.63106e+06	2.75979e+06	2.49651e+06	2.51841e+06	2.67205e+06
Dikegulac acid	292.143	333.452	Organic oxygen compounds	Organooxygen compounds	Ethers	7.58047e+06	7.94999e+06	8.15429e+06	4.96318e+06	6.03042e+06	5.86791e+06	7.68928e+06	8.36927e+06	7.73177e+06	8.04726e+06	7.86885e+06	7.92102e+06	7.88057e+06	8.06844e+06	8.13871e+06
Dilinolenin (9c,12c,15c)	613.481	57.4475	Lipids and lipid-like molecules	Fatty Acyls	Lineolic acids and derivatives	1.34593e+07	1.36204e+07	2.69009e+07	2.99762e+07	2.13257e+07	1.84842e+07	7.0108e+06	9.02413e+06	7.54285e+06	1.20558e+07	1.4117e+07	1.33688e+07	1.28454e+07	1.3719e+07	1.37166e+07
Dimethirimol	210.06	936.084	Organic nitrogen compounds	Organonitrogen compounds	Amines	4.04362e+06	4.181e+06	4.25811e+06	3.67234e+06	4.17634e+06	9.97492e+06	2.47726e+06	3.57117e+06	3.65002e+06	2.88847e+06	3.71438e+06	2.05522e+06	4.34977e+06	4.71026e+06	4.7053e+06
Dimethyl sebacate	149.096	51.8651	Lipids and lipid-like molecules	Fatty Acyls	Fatty acid esters	6.79066e+06	5.73475e+06	2.85767e+06	3.70207e+06	5.85915e+06	1.62348e+06	8.0069e+06	8.83459e+06	2.31526e+06	6.04356e+06	7.21878e+06	7.3414e+06	5.91291e+06	5.91226e+06	6.03284e+06
Dimethyl sulfoxide	79.0216	90.8542				1.36665e+07	1.40974e+07	1.34423e+07	1.38332e+07	1.33569e+07	1.37438e+07	9.5693e+06	1.1351e+07	9.60023e+06	1.32242e+07	1.46574e+07	1.53592e+07	1.29776e+07	1.30401e+07	1.67609e+07
Disialyllactose	485.14	440.339	Organic oxygen compounds	Organooxygen compounds	Carbohydrates and carbohydrate conjugates	1.63719e+07	1.78288e+07	1.68684e+07	9.6104e+06	7.91595e+06	8.56439e+06	2.27826e+07	2.53023e+07	2.63864e+07	1.71448e+07	1.79106e+07	1.80549e+07	1.06797e+07	1.09075e+07	1.08719e+07
DL-2,4-Diaminobutyric acid	83.0607	754.733				6.2941e+06	5.0728e+06	5.85554e+06	8.99263e+06	4.51596e+06	6.57534e+06	7.70789e+06	6.06005e+06	5.83507e+06	4.34804e+06	4.66248e+06	3.37588e+06	7.16159e+06	6.18982e+06	6.42962e+06
DL-3-Phenyllactic acid	149.063	391.43	Phenylpropanoids and polyketides/Alkaloids and derivatives	Phenylpropanoic acids/Tropane alkaloids		96404.4	656739	22925.9	73709.2	447560	79076.4	625813	154069	24351	197908	155625	423186	206600	504844	484764
Dl-a-hydroxybutyric acid	105.055	301.148	Organic acids and derivatives	Hydroxy acids and derivatives	Alpha hydroxy acids and derivatives	6.31881e+06	6.70604e+06	5.77784e+06	5.09509e+06	5.10026e+06	4.974e+06	5.54631e+06	7.04993e+06	6.06513e+06	4.51891e+06	6.27813e+06	6.30259e+06	5.75308e+06	5.74154e+06	4.95022e+06
DL-arginine	175.143	1010.8	Organic acids and derivatives	Carboxylic acids and derivatives	Amino acids, peptides, and analogues	2.28866e+08	2.22954e+08	2.04043e+08	1.62231e+08	1.886e+08	1.89671e+08	2.08949e+08	2.42653e+08	1.95133e+08	1.65185e+08	2.08826e+08	2.48281e+08	2.12138e+08	2.12065e+08	2.18032e+08
DL-asparagine	133.06	738.697	Organic acids and derivatives	Carboxylic acids and derivatives	Amino acids, peptides, and analogues	4.00982e+07	3.98045e+07	4.85693e+07	4.5208e+07	3.46147e+07	3.70601e+07	8.65415e+07	4.87219e+07	4.60908e+07	3.86657e+07	8.46359e+07	8.78828e+07	5.17635e+07	6.04359e+07	5.20247e+07
Dl-benzylsuccinic acid	191.081	129.933				1.35381e+08	1.4641e+08	1.47713e+08	1.04907e+08	6.83032e+07	9.04056e+07	1.25422e+08	1.28015e+08	1.33624e+08	1.46276e+08	1.20135e+08	1.25273e+08	1.10809e+08	1.11257e+08	1.17992e+08
Dl-.beta.-homophenylalanine	180.086	169.122	Organic acids and derivatives	Carboxylic acids and derivatives	Amino acids, peptides, and analogues	1.75752e+07	1.76583e+07	1.6779e+07	5.44655e+07	4.26323e+07	4.85097e+07	1.48602e+07	1.48326e+07	1.45305e+07	1.37722e+07	1.3517e+07	1.42174e+07	1.70425e+07	1.71874e+07	1.75792e+07
DL-Glutamic acid	148.06	743.152	Organic acids and derivatives	Carboxylic acids and derivatives	Amino acids, peptides, and analogues	2.84775e+09	2.9246e+09	2.62611e+09	2.02378e+09	2.1727e+09	2.12358e+09	3.66672e+09	4.10892e+09	3.79287e+09	2.78092e+09	3.38206e+09	3.38003e+09	3.32681e+09	3.36818e+09	3.40285e+09
DL-glutamine	147.076	712.999	Organic acids and derivatives	Carboxylic acids and derivatives	Amino acids, peptides, and analogues	1.83974e+08	1.54574e+08	1.6011e+08	1.43758e+08	1.50023e+08	1.49183e+08	1.54746e+08	1.53155e+08	1.63961e+08	1.86936e+08	1.59039e+08	1.50679e+08	1.53106e+08	1.49685e+08	1.48625e+08
DL-isoleucine	132.102	487.919	Organic acids and derivatives	Carboxylic acids and derivatives	Amino acids, peptides, and analogues	4.19092e+08	4.46763e+08	8.17904e+08	4.88097e+08	4.48041e+08	4.12127e+08	3.32265e+08	3.71863e+08	3.15161e+08	3.76872e+08	4.43529e+08	9.01836e+08	4.71666e+08	4.73305e+08	4.89262e+08
Dl-normetanephrine	134.06	137.985	Benzenoids	Phenols	Methoxyphenols	3.26717e+06	3.26839e+06	3.55972e+06	2.71552e+06	5.04567e+06	5.21375e+06	4.40092e+06	4.52196e+06	5.07383e+06	2.63912e+06	4.03193e+06	4.96909e+06	4.16107e+06	4.2381e+06	4.51646e+06
DL-proline	116.071	563.885	Organic acids and derivatives	Carboxylic acids and derivatives	Amino acids, peptides, and analogues	3.56139e+07	3.60659e+07	3.83048e+07	3.31474e+07	2.149e+07	2.44656e+07	4.22761e+07	3.71796e+07	3.82093e+07	8.254e+07	4.38922e+07	4.19696e+07	3.67603e+07	3.69285e+07	3.98133e+07
Dl-threonine methyl ester	116.071	156.587	Organic acids and derivatives	Carboxylic acids and derivatives	Amino acids, peptides, and analogues	6.27874e+06	6.47366e+06	6.46078e+06	5.59083e+06	5.94151e+06	5.38626e+06	6.42557e+06	6.8952e+06	6.36549e+06	6.53357e+06	6.66958e+06	6.39061e+06	6.54573e+06	6.64435e+06	6.72194e+06
DL-tyrosine	182.081	541.971	Organic acids and derivatives	Carboxylic acids and derivatives	Amino acids, peptides, and analogues	3.76991e+08	3.55811e+08	3.83767e+08	4.12559e+08	4.10653e+08	4.12241e+08	3.13323e+08	3.92284e+08	3.00128e+08	2.29772e+08	4.14561e+08	3.91344e+08	3.7485e+08	3.88314e+08	3.9785e+08
DL-valine	118.086	536.544	Organic acids and derivatives	Carboxylic acids and derivatives	Amino acids, peptides, and analogues	3.22483e+08	3.22236e+08	3.00422e+08	3.70713e+08	3.60894e+08	3.67413e+08	2.55854e+08	2.99367e+08	2.60997e+08	3.33203e+08	3.67108e+08	3.76667e+08	3.55357e+08	3.67311e+08	3.66931e+08
D-mannosamine	162.054	427.106	Organic oxygen compounds	Organooxygen compounds	Carbohydrates and carbohydrate conjugates	2.518e+07	2.5045e+07	2.31986e+07	2.31363e+07	7.44039e+06	7.32144e+06	8.98096e+06	1.03789e+07	7.83728e+06	2.01074e+07	6.7066e+06	7.42809e+06	8.93576e+06	9.07536e+06	9.63542e+06
D-Mannose	145.049	150.895	Organic oxygen compounds	Organooxygen compounds	Carbohydrates and carbohydrate conjugates	1.10646e+07	1.18552e+07	1.10726e+07	7.06181e+06	6.25047e+06	7.35204e+06	1.18707e+07	1.29492e+07	1.22446e+07	1.03661e+07	8.65716e+06	1.2569e+07	1.02539e+07	9.94731e+06	9.93373e+06
D-mannose-6-phosphate	261.036	931.681	Organic oxygen compounds	Organooxygen compounds	Carbohydrates and carbohydrate conjugates	1.86802e+07	1.80094e+07	1.78573e+07	1.67545e+07	3.25648e+07	3.15283e+07	2.13485e+07	2.95438e+07	2.33422e+07	1.21451e+07	2.51707e+07	3.23942e+07	2.51223e+07	2.53156e+07	2.60079e+07
D-neopterin	218.092	203.789	Organoheterocyclic compounds	Pteridines and derivatives	Pterins and derivatives	2.3022e+07	4.13696e+07	3.95872e+07	1.9584e+07	1.09614e+07	6.62985e+06	6.09783e+06	4.51696e+07	4.36216e+07	4.51074e+07	5.10063e+07	5.12139e+07	1.25229e+07	1.26821e+07	1.41248e+07
Dodecanoic acid, 12-[[(cyclohexylamino)carbonyl]amino]-	198.185	51.3828	Lipids and lipid-like molecules	Fatty Acyls	Fatty acids and conjugates	1.28866e+07	7.65478e+06	5.06391e+06	7.84143e+06	5.11273e+06	1.29074e+07	1.12264e+06	3.75144e+06	5.90766e+06	3.53537e+06	4.40941e+06	4.6533e+06	8.06081e+06	8.06009e+06	8.13851e+06
D-(-)-penicillamine	149.096	177.94	Organic acids and derivatives	Carboxylic acids and derivatives	Amino acids, peptides, and analogues	3.80483e+06	3.64067e+06	7.94728e+06	5.61946e+06	6.16403e+06	7.90295e+06	5.08963e+06	4.8097e+06	5.45825e+06	4.17658e+06	4.95552e+06	4.76997e+06	5.00782e+06	5.10003e+06	6.12835e+06
D-psicose	127.039	538.594	Organic oxygen compounds	Organooxygen compounds	Carbohydrates and carbohydrate conjugates	1.4174e+08	9.0774e+07	1.47132e+08	1.16561e+08	1.16216e+08	1.34427e+08	1.31929e+08	1.38489e+08	1.39952e+08	1.30842e+08	1.36198e+08	1.50977e+08	1.40046e+08	1.44342e+08	1.44341e+08
D-pyroglutamic acid	259.092	863.443	Organic acids and derivatives	Carboxylic acids and derivatives	Amino acids, peptides, and analogues	1.10465e+07	1.15799e+07	1.15678e+07	1.10779e+07	1.06525e+07	1.07473e+07	1.14071e+07	1.09006e+07	1.15887e+07	1.07797e+07	1.07914e+07	1.12743e+07	1.07766e+07	1.0855e+07	1.12808e+07
Dulcitol	129.054	212.589	Organic oxygen compounds	Organooxygen compounds	Carbohydrates and carbohydrate conjugates	2.44882e+08	2.15052e+08	2.25453e+08	1.2006e+08	1.24264e+08	1.24761e+08	3.98917e+08	4.60798e+08	4.08179e+08	2.31175e+08	3.04986e+08	3.20611e+08	2.36409e+08	2.36007e+08	2.2506e+08
D-xylose	151.047	689.692	Organic oxygen compounds	Organooxygen compounds	Carbohydrates and carbohydrate conjugates	5.17243e+07	3.08579e+07	3.13863e+07	5.11053e+07	2.65707e+07	4.09519e+07	4.4224e+07	2.87589e+07	4.41323e+07	5.80292e+07	2.68997e+07	8.03002e+06	3.35302e+07	3.5364e+07	3.54276e+07
D-xylulose	115.054	426.897	Organic oxygen compounds	Organooxygen compounds	Carbohydrates and carbohydrate conjugates	3.92482e+06	4.03727e+06	3.25923e+06	2.39261e+06	7.64411e+06	7.03592e+06	7.75858e+06	7.67329e+06	7.64436e+06	2.10008e+06	5.9731e+06	7.60533e+06	6.40448e+06	6.57544e+06	7.18743e+06
Ectoine	143.081	604.045	Organic acids and derivatives	Carboxylic acids and derivatives	Amino acids, peptides, and analogues	790996	1.02757e+06	1.00324e+06	1.33345e+06	925215	1.18211e+06	1.53034e+06	2.54056e+06	1.38031e+06	1.14393e+06	1.08997e+06	1.27548e+06	1.07955e+06	1.12887e+06	1.13377e+06
Edaravone	175.086	239.029	Organoheterocyclic compounds	Azolines	Pyrazolines	7.86236e+06	8.80197e+06	7.26998e+06	6.92576e+06	5.94662e+06	6.34366e+06	1.02198e+07	1.17355e+07	9.84209e+06	8.77705e+06	1.11723e+07	1.21392e+07	8.87111e+06	8.87756e+06	9.32024e+06
Enterolactone	299.105	662.163	Lignans, neolignans and related compounds	Furanoid lignans	Tetrahydrofuran lignans	1.98917e+06	1.99533e+06	1.9969e+06	1.41543e+06	1.19382e+06	1.28281e+06	2.58266e+06	3.37627e+06	2.74668e+06	1.90544e+06	1.99007e+06	2.27279e+06	2.01724e+06	2.04352e+06	2.10994e+06
(-)-epigallocatechin	307.082	956.084	Phenylpropanoids and polyketides	Flavonoids	Flavans	1.64465e+06	1.67181e+06	2.16656e+06	2.18783e+06	6.16997e+06	6.63053e+06	2.65481e+06	3.43509e+06	3.24015e+06	1.13343e+06	3.40619e+06	4.27468e+06	3.62379e+06	3.66129e+06	3.95667e+06
Eprosartan	425.141	390.338	Benzenoids	Benzene and substituted derivatives	Benzoic acids and derivatives	1.41764e+07	1.40369e+07	1.46198e+07	1.51882e+07	1.58117e+07	1.48218e+07	1.17983e+07	1.41541e+07	1.09689e+07	1.75507e+07	1.90237e+07	2.1794e+07	1.63673e+07	1.66223e+07	1.61882e+07
.epsilon.-caprolactam	114.091	60.6625	Organoheterocyclic compounds	Lactams	Caprolactams	6.63461e+06	6.56802e+06	6.55072e+06	6.83307e+06	5.16727e+06	5.26983e+06	7.42271e+06	6.55879e+06	6.64026e+06	6.87392e+06	6.89856e+06	6.96554e+06	6.73835e+06	6.86531e+06	7.05458e+06
Eriodictyol	289.088	691.82	Phenylpropanoids and polyketides	Flavonoids	Flavans	1.90219e+07	2.04095e+07	2.14466e+07	2.18528e+07	1.74381e+07	1.78841e+07	2.03151e+07	2.35291e+07	1.96737e+07	2.47051e+07	2.09019e+07	2.26571e+07	1.87593e+07	1.87593e+07	1.88183e+07
Erucamide	338.34	51.2251	Lipids and lipid-like molecules	Fatty Acyls	Fatty amides	1.774e+08	1.30854e+08	1.01563e+08	1.09095e+08	1.03487e+08	1.49072e+08	6.57361e+07	1.03955e+08	1.07024e+08	8.90383e+07	1.16053e+08	9.72859e+07	1.32348e+08	1.35251e+08	1.35126e+08
Estriol 16alpha-(beta-d-glucuronide)	487.192	311.214	Lipids and lipid-like molecules	Steroids and steroid derivatives	Steroidal glycosides	6.25029e+06	6.43946e+06	6.64358e+06	7.42935e+06	8.73112e+06	9.6892e+06	6.25381e+06	7.74607e+06	6.4688e+06	9.47336e+06	7.96514e+06	9.46092e+06	5.44347e+06	5.44651e+06	5.66059e+06
Estrone glucuronide	469.167	440.484	Lipids and lipid-like molecules	Steroids and steroid derivatives	Steroidal glycosides	4.69015e+07	4.75018e+07	4.87447e+07	2.35956e+07	2.20755e+07	2.26156e+07	6.77901e+07	7.68462e+07	7.53656e+07	4.66512e+07	4.98444e+07	4.91464e+07	4.93632e+07	4.98602e+07	4.93566e+07
Ethirimol	210.16	439.876	Organoheterocyclic compounds	Diazines	Pyrimidines and pyrimidine derivatives	7.19834e+06	6.63072e+06	6.92116e+06	5.52432e+06	7.54043e+06	9.21603e+06	2.05869e+07	2.73181e+07	2.06219e+07	9.56961e+06	1.28456e+07	1.48348e+07	1.34339e+07	1.382e+07	1.38035e+07
Ethylenediaminetetraacetic acid	293.096	810.751	Organic acids and derivatives	Carboxylic acids and derivatives	Tetracarboxylic acids and derivatives	635355	829319	647375	960951	1.82398e+06	1.65975e+06	1.73536e+06	2.09363e+06	1.60335e+06	974976	1.47249e+06	1.62826e+06	1.64503e+06	1.65245e+06	1.74418e+06
Evodiamine	171.091	90.4245	Organoheterocyclic compounds	Indoles and derivatives	Pyridoindoles	2.33684e+07	2.51374e+07	2.1269e+07	2.36609e+07	1.91071e+07	2.32176e+07	4.24764e+07	4.52252e+07	4.10744e+07	2.14201e+07	3.14064e+07	2.78408e+07	2.51177e+07	2.61107e+07	2.60792e+07
Exo-norborneol	95.0857	214.364	Lipids and lipid-like molecules	Prenol lipids	Monoterpenoids	1.08086e+07	1.0519e+07	1.29443e+07	1.0898e+07	1.65278e+07	1.20968e+07	1.60258e+07	1.34168e+07	1.95366e+07	1.8221e+07	1.57452e+07	3.16033e+07	1.19259e+07	1.20515e+07	1.20514e+07
Famotidine acid methyl ester	275.052	763.131	Organoheterocyclic compounds	Azoles	Thiazoles	2.624e+06	2.83355e+06	2.25194e+06	2.66836e+06	8.82183e+06	9.74944e+06	2.95484e+06	3.78444e+06	3.7838e+06	1.56303e+06	3.37165e+06	3.71488e+06	4.68978e+06	4.89791e+06	4.88744e+06
Farrerol	147.044	541.605	Phenylpropanoids and polyketides	Flavonoids	Flavans	5.50768e+07	5.4239e+07	5.85922e+07	5.82247e+07	5.07361e+07	5.40059e+07	3.60133e+07	5.44954e+07	3.83574e+07	3.43835e+07	5.49384e+07	5.68876e+07	4.94619e+07	5.06063e+07	5.4018e+07
Fenpiclonil	239.001	1155.1	Organoheterocyclic compounds	Pyrroles	Substituted pyrroles	8.42991e+06	1.02204e+07	7.72257e+06	6.54394e+06	6.6869e+06	1.18203e+07	5.20759e+06	1.05392e+07	4.95564e+06	1.01259e+07	1.162e+07	5.72281e+06	2.73416e+07	2.7316e+07	2.85393e+07
Fenpropidin	274.273	101.366	Benzenoids	Benzene and substituted derivatives	Phenylpropanes	1.1867e+08	1.16177e+08	8.84928e+07	1.02324e+08	9.01527e+07	6.89541e+07	1.19229e+08	1.17042e+08	1.09168e+08	9.22485e+07	8.28982e+07	8.35911e+07	8.05021e+07	7.88551e+07	7.88703e+07
Fenpropimorph	304.262	56.5631	Benzenoids	Benzene and substituted derivatives	Phenylpropanes	4.06126e+06	4.14123e+06	5.90836e+06	5.19845e+06	4.77409e+06	4.56602e+06	5.73796e+06	6.44487e+06	6.51237e+06	6.07741e+06	7.02294e+06	6.71058e+06	5.52209e+06	5.73013e+06	5.52492e+06
Feruloyl lysine	323.159	522.603	Benzenoids	Phenols	Methoxyphenols	1.15376e+07	1.13786e+07	1.10399e+07	1.15391e+07	1.13107e+07	1.17941e+07	1.32997e+07	1.90998e+07	1.29003e+07	1.31622e+07	1.66133e+07	1.86645e+07	1.28737e+07	1.30449e+07	1.28716e+07
Feruloyl o-methyldehydrodopamine	342.132	82.474				1.79727e+06	1.8635e+06	1.33764e+06	2.79941e+06	1.68584e+06	3.24958e+06	2.87877e+06	4.62052e+06	3.23246e+06	3.20597e+06	2.94826e+06	2.61902e+06	2.5413e+06	2.55683e+06	2.55535e+06
Feruloyl o-methyldopamine	344.148	63.248	Phenylpropanoids and polyketides	Cinnamic acids and derivatives	Hydroxycinnamic acids and derivatives	1.51505e+06	1.79577e+06	1.67448e+06	2.23827e+06	3.02639e+06	988223	2.82651e+06	3.20071e+06	2.87467e+06	2.17049e+06	2.36251e+06	2.82134e+06	1.60179e+06	1.47715e+06	1.45861e+06
Feruloyl putrescine (isomer of 1178)	265.154	447.124	Phenylpropanoids and polyketides	Cinnamic acids and derivatives	Hydroxycinnamic acids and derivatives	2.60611e+08	2.70117e+08	2.56484e+08	2.02883e+08	2.2506e+08	2.04574e+08	2.83598e+08	2.8456e+08	3.01751e+08	2.1392e+08	2.85744e+08	2.99267e+08	2.8522e+08	2.93281e+08	2.93449e+08
Feruloyl tyramine	314.138	58.354	Benzenoids	Phenols	Methoxyphenols	5.66972e+07	5.7794e+07	5.21166e+07	4.2621e+07	5.63128e+07	6.7313e+07	5.27673e+07	5.77976e+07	5.64458e+07	5.82562e+07	5.77477e+07	5.63318e+07	5.37878e+07	5.39572e+07	5.7021e+07
Fingolimod	290.268	113.547	Organic nitrogen compounds	Organonitrogen compounds	Amines	2.74671e+06	2.89376e+06	1.67244e+06	2.08679e+06	2.33173e+06	1.30474e+06	3.14616e+06	2.2733e+06	1.91467e+06	1.37963e+06	1.43475e+06	1.20162e+06	1.63096e+06	1.6363e+06	1.56826e+06
Flavopiridol	402.129	721.911	Phenylpropanoids and polyketides	Flavonoids	Flavones	1.7242e+06	1.94903e+06	1.88726e+06	833076	785187	866286	3.62552e+06	4.26038e+06	3.53354e+06	2.66908e+06	2.91095e+06	2.78194e+06	2.21833e+06	2.28396e+06	2.28411e+06
Flonicamid	174.038	400.033	Organoheterocyclic compounds	Pyridines and derivatives	Pyridinecarboxylic acids and derivatives	1.88367e+06	1.71744e+06	1.93274e+06	2.35759e+06	2.33439e+06	2.18693e+06	1.72886e+06	1.97533e+06	1.62752e+06	2.16693e+06	1.943e+06	1.92469e+06	1.75533e+06	1.77503e+06	1.75535e+06
Flufenacet	152.031	689.747	Benzenoids	Benzene and substituted derivatives	Anilides	2.55561e+07	1.55482e+07	1.49485e+07	2.51654e+07	2.27389e+07	2.10241e+07	2.2278e+07	2.2561e+07	2.19052e+07	2.71909e+07	1.3155e+07	1.31194e+07	1.59198e+07	1.41536e+07	1.41148e+07
Flumazenil	276.071	844.156	Organoheterocyclic compounds	Benzodiazepines	1,4-benzodiazepines	2.46061e+06	2.95343e+06	3.11885e+06	3.34151e+06	2.72259e+06	3.48249e+06	4.549e+06	5.06781e+06	4.11158e+06	3.64996e+06	3.62664e+06	3.51237e+06	3.47064e+06	3.62866e+06	3.62206e+06
Flutamide	277.076	278.332	Benzenoids	Benzene and substituted derivatives	Trifluoromethylbenzenes	1.24444e+07	1.7423e+07	1.27034e+07	1.81412e+07	8.09084e+06	2.76852e+07	1.65484e+07	1.91764e+07	2.18353e+07	1.98303e+07	9.8565e+06	1.98305e+07	6.74426e+06	6.43464e+06	6.76089e+06
Formylanthranilic acid	148.039	251.448	Benzenoids	Benzene and substituted derivatives	Benzoic acids and derivatives	1.38053e+06	1.86729e+06	1.24203e+06	1.45831e+06	1.47906e+06	1.48763e+06	1.28629e+06	1.30983e+06	1.039e+06	1.43752e+06	1.77518e+06	1.85358e+06	1.37012e+06	1.37128e+06	1.42733e+06
Fortunellin	615.173	901.699	Phenylpropanoids and polyketides	Flavonoids	Flavonoid glycosides	1.00092e+07	1.00249e+07	1.06526e+07	1.04602e+07	8.90521e+06	1.00494e+07	1.07644e+07	1.28991e+07	1.00855e+07	1.19979e+07	1.29542e+07	1.21001e+07	1.0499e+07	1.07253e+07	1.07303e+07
Fucosterol	395.366	103.668	Lipids and lipid-like molecules	Steroids and steroid derivatives	Stigmastanes and derivatives	2.51456e+07	2.69329e+07	2.21918e+07	1.93321e+07	1.14335e+07	1.85246e+07	2.95826e+07	3.03168e+07	2.95593e+07	3.04951e+07	2.42841e+07	2.40144e+07	1.87808e+07	1.92835e+07	1.86224e+07
Fumagillin	481.203	353.648	Lipids and lipid-like molecules	Fatty Acyls	Fatty acids and conjugates	1.20662e+06	1.21709e+06	1.35274e+06	1.44402e+06	1.1733e+06	1.30573e+06	2.22978e+06	2.66956e+06	2.10114e+06	3.41951e+06	3.99297e+06	4.97808e+06	2.38731e+06	2.38888e+06	2.47626e+06
Fusarenone-x	377.11	676.405	Lipids and lipid-like molecules	Prenol lipids	Sesquiterpenoids	2.28593e+06	2.25124e+06	2.18711e+06	2.17699e+06	2.28003e+06	2.22624e+06	2.23074e+06	3.11706e+06	2.59168e+06	2.38562e+06	3.19223e+06	2.78344e+06	2.32029e+06	2.27725e+06	2.26444e+06
Galactosamine	180.086	443.953	Organic oxygen compounds	Organooxygen compounds	Carbohydrates and carbohydrate conjugates	1.74471e+09	1.00218e+09	9.99972e+08	8.92394e+08	1.57452e+09	8.76545e+08	1.84636e+09	1.86704e+09	1.9453e+09	5.44136e+08	1.91534e+09	2.05493e+09	1.95177e+09	2.04729e+09	2.04605e+09
gamma-Aminobutryic acid	104.071	581.556				5.61741e+07	6.25432e+07	1.0113e+06	6.90731e+07	7.02796e+07	1.35981e+06	1.07123e+06	1.45485e+06	989385	6.47782e+07	2.02298e+06	8.30481e+07	7.17108e+07	7.22087e+07	7.62287e+07
.gamma.-aminobutyric acid	104.071	678.363	Organic acids and derivatives	Carboxylic acids and derivatives	Amino acids, peptides, and analogues	1.36586e+09	1.42175e+09	1.31291e+09	1.4321e+09	1.43774e+09	1.45185e+09	1.44604e+09	1.44095e+09	1.42925e+09	1.17797e+09	1.42458e+09	1.45917e+09	1.42867e+09	1.43541e+09	1.45359e+09
.gamma.-heptalactone	129.102	746.085	Organoheterocyclic compounds	Lactones	Gamma butyrolactones	3.17875e+06	3.75766e+06	2.54827e+06	2.79174e+06	4.92632e+06	5.04453e+06	6.79879e+06	1.586e+06	7.38829e+06	3.16445e+06	4.32959e+06	2.96864e+06	6.20165e+06	6.36665e+06	6.36129e+06
Gamma-l-glutamyl-l-glutamic acid	277.102	873.632	Organic acids and derivatives	Carboxylic acids and derivatives	Amino acids, peptides, and analogues	6.29841e+07	6.42892e+07	6.28452e+07	4.65873e+07	4.58467e+07	3.56343e+07	1.58794e+08	2.02057e+08	1.61528e+08	8.28061e+07	1.00304e+08	1.11015e+08	9.51878e+07	9.55344e+07	9.56047e+07
.gamma.-linolenoyl ethanolamide	261.221	48.131	Organic nitrogen compounds	Organonitrogen compounds	Amines	4.13365e+06	4.40373e+06	3.92263e+06	2.45924e+06	2.65297e+06	2.69043e+06	5.26565e+06	5.33467e+06	6.30311e+06	3.24865e+06	3.39104e+06	2.8519e+06	4.00002e+06	3.97567e+06	4e+06
Gardenin b	359.13	369.222	Phenylpropanoids and polyketides	Flavonoids	O-methylated flavonoids	7.58244e+06	6.72785e+06	7.43572e+06	4.63833e+06	3.06473e+06	2.66227e+06	1.19402e+07	1.36976e+07	1.16776e+07	8.85204e+06	8.33404e+06	7.23533e+06	7.3472e+06	7.34475e+06	7.61979e+06
Geniposidic acid	397.089	594.904	Lipids and lipid-like molecules	Prenol lipids	Terpene glycosides	3.69618e+06	3.19852e+06	3.17405e+06	3.33393e+06	3.03838e+06	3.38554e+06	5.23328e+06	5.55977e+06	4.65917e+06	3.94877e+06	3.96391e+06	4.24126e+06	3.87407e+06	3.97659e+06	3.97538e+06
G-guanidinobutyrate	146.092	651.017	Organic acids and derivatives	Carboxylic acids and derivatives	Amino acids, peptides, and analogues	2.70692e+07	2.92696e+07	2.73126e+07	3.37808e+07	3.07508e+07	3.28508e+07	3.38374e+07	3.34514e+07	3.27925e+07	3.40853e+07	3.2514e+07	3.45863e+07	3.14896e+07	3.23977e+07	3.23719e+07
Ginkgolide b	407.115	497.31				9.91596e+06	9.91393e+06	8.98116e+06	6.72797e+06	8.40131e+06	6.71719e+06	9.65731e+06	1.0557e+07	9.21295e+06	5.7554e+06	7.89704e+06	7.92209e+06	1.04299e+07	1.04633e+07	1.08488e+07
Gln-gln	257.104	375.69	Organic acids and derivatives	Carboxylic acids and derivatives	Amino acids, peptides, and analogues	1.81958e+06	1.68088e+06	1.54051e+06	1.38343e+06	1.26803e+06	1.71244e+06	3.38639e+06	3.85281e+06	3.34251e+06	2.42629e+06	2.58019e+06	2.46983e+06	2.34745e+06	2.36069e+06	2.63935e+06
Glu-Ala-Arg	375.223	960.749	Organic acids and derivatives	Carboxylic acids and derivatives	Amino acids, peptides, and analogues	909930	936582	824888	1.1652e+06	1.11638e+06	1.11359e+06	1.112e+06	1.11418e+06	1.12094e+06	755328	1.14e+06	1.12342e+06	1.09217e+06	1.09631e+06	1.14479e+06
Glu-Asn	262.103	825.795	Organic acids and derivatives	Carboxylic acids and derivatives	Amino acids, peptides, and analogues	2.26206e+06	2.173e+06	2.14669e+06	3.25038e+06	2.76246e+06	3.22858e+06	3.14986e+06	3.19776e+06	3.1406e+06	3.09077e+06	3.30354e+06	3.11766e+06	2.93134e+06	3.08098e+06	3.07619e+06
Glucosamine	144.065	448.718	Organic oxygen compounds	Organooxygen compounds	Carbohydrates and carbohydrate conjugates	4.28996e+07	4.26955e+07	4.00805e+07	3.65469e+07	4.43012e+07	4.21035e+07	4.71704e+07	5.3189e+07	4.75835e+07	3.72592e+07	4.75711e+07	5.01092e+07	4.83921e+07	4.98888e+07	4.98991e+07
Glu-gln	276.118	811.079	Organic acids and derivatives	Carboxylic acids and derivatives	Amino acids, peptides, and analogues	1.07672e+08	1.13648e+08	1.11953e+08	1.66817e+08	1.55794e+08	1.70835e+08	1.22909e+08	1.68594e+08	1.27692e+08	1.46513e+08	1.5914e+08	1.79439e+08	1.53897e+08	1.59135e+08	1.58924e+08
Gly-Ala-Arg	303.177	797.295	Organic acids and derivatives	Carboxylic acids and derivatives	Amino acids, peptides, and analogues	1.91141e+06	1.98767e+06	1.92211e+06	2.22466e+06	2.84326e+06	2.93883e+06	2.45192e+06	2.16724e+06	2.0804e+06	1.28113e+06	2.19741e+06	2.30221e+06	2.32133e+06	2.41815e+06	2.3757e+06
Glycerol	93.0549	726.853	Organic oxygen compounds	Organooxygen compounds	Carbohydrates and carbohydrate conjugates	2.62409e+06	2.47644e+06	2.57326e+06	2.33426e+06	2.7181e+06	2.82073e+06	3.16989e+06	3.67011e+06	3.31999e+06	2.74753e+06	3.47096e+06	3.26048e+06	3.0617e+06	3.27423e+06	3.27166e+06
Glycerol 3-phosphate	173.021	820.11	Lipids and lipid-like molecules	Glycerophospholipids	Glycerophosphates	2.4782e+07	2.43663e+07	2.216e+07	2.11397e+07	2.23452e+07	2.23419e+07	2.2468e+07	2.29972e+07	2.33258e+07	1.88904e+07	2.37042e+07	2.36496e+07	2.31262e+07	2.39672e+07	2.3952e+07
Glycerophosphocholine	258.109	707.91	Lipids and lipid-like molecules	Glycerophospholipids	Glycerophosphocholines	1.4093e+09	1.42085e+09	1.40058e+09	1.29082e+09	1.3693e+09	1.3605e+09	9.7208e+08	1.12562e+09	9.28024e+08	8.83204e+08	1.15013e+09	1.23183e+09	1.35948e+09	1.37997e+09	1.39929e+09
Glycerophosphorylcholine	257.993	708.055	Lipids and lipid-like molecules	Glycerophospholipids	Glycerophosphocholines	2.89914e+06	3.32675e+06	2.83534e+06	3.38782e+06	3.41094e+06	3.07731e+06	2.93183e+06	3.31962e+06	3.24825e+06	1.42892e+06	3.08549e+06	3.32093e+06	3.04854e+06	3.04567e+06	3.36603e+06
Gly-Ile-Arg	345.223	688.686	Organic acids and derivatives	Carboxylic acids and derivatives	Amino acids, peptides, and analogues	7.94787e+06	7.69283e+06	7.16927e+06	8.18727e+06	7.06968e+06	7.9742e+06	7.37115e+06	8.35635e+06	8.33424e+06	5.86496e+06	7.7278e+06	8.14473e+06	7.27197e+06	7.31078e+06	7.75491e+06
Gly-phe-.beta.-naphthylamide	695.334	636.281	Organic acids and derivatives	Carboxylic acids and derivatives	Amino acids, peptides, and analogues	8.90099e+06	9.76825e+06	9.17993e+06	8.63763e+06	9.11518e+06	1.01804e+07	1.16517e+07	1.11272e+07	1.08662e+07	1.15462e+07	1.188e+07	1.28852e+07	1.16981e+07	1.17727e+07	1.20381e+07
Guanidinosuccinic acid	134.063	60.7835	Organic acids and derivatives	Carboxylic acids and derivatives	Amino acids, peptides, and analogues	2.01333e+07	2.0116e+07	2.41209e+07	2.41354e+07	1.07838e+07	1.64741e+07	3.93272e+07	3.04656e+07	2.9671e+07	1.83712e+07	2.45597e+07	2.37516e+07	3.42603e+07	3.45036e+07	3.86523e+07
Guanidoacetic acid	118.065	282.086	Organic acids and derivatives	Carboxylic acids and derivatives	Amino acids, peptides, and analogues	2.39052e+07	2.77605e+07	2.29615e+07	1.88721e+07	1.77939e+07	1.37375e+07	2.57526e+07	3.15522e+07	2.69706e+07	2.16723e+07	2.39726e+07	2.27423e+07	2.18315e+07	2.12312e+07	2.16057e+07
Guanine	152.056	468.165	Organoheterocyclic compounds	Imidazopyrimidines	Purines and purine derivatives	3.42554e+08	3.83525e+08	3.95287e+08	3.22044e+08	3.12156e+08	3.52509e+08	4.88107e+08	6.36304e+08	4.40376e+08	4.01201e+08	4.66539e+08	4.33699e+08	4.32715e+08	4.49635e+08	4.52495e+08
Guanosine 5'-monophosphate	364.064	880.249	Nucleosides, nucleotides, and analogues	Purine nucleotides	Purine ribonucleotides	2.12702e+07	2.29643e+07	2.12774e+07	1.83351e+07	2.19105e+07	2.32791e+07	2.92537e+07	4.28388e+07	2.8521e+07	1.5703e+07	2.56983e+07	2.682e+07	2.62837e+07	2.74915e+07	2.74767e+07
Gyromitrin	118.122	458.604	Organic nitrogen compounds	Organonitrogen compounds	Hydrazines and derivatives	2.91913e+06	3.20946e+06	2.66607e+06	3.52151e+06	3.80239e+06	3.30518e+06	3.52416e+06	4.38648e+06	3.50545e+06	3.73562e+06	4.22676e+06	3.40656e+06	3.99063e+06	3.79329e+06	3.98707e+06
Harmaline	215.138	625.014	Alkaloids and derivatives	Harmala alkaloids		8.26511e+06	9.35524e+06	7.95284e+06	9.30983e+06	7.68278e+06	9.08278e+06	9.9391e+06	1.24824e+07	1.00146e+07	9.36697e+06	1.00756e+07	1.17996e+07	9.84068e+06	9.95152e+06	1.02211e+07
Helicin	307.078	151.126	Organic oxygen compounds	Organooxygen compounds	Carbohydrates and carbohydrate conjugates	4.42011e+06	4.4719e+06	5.14951e+06	2.75202e+06	2.3104e+06	3.0285e+06	4.05981e+06	4.70299e+06	4.18244e+06	5.35715e+06	4.69855e+06	5.21393e+06	3.79953e+06	3.92978e+06	3.79811e+06
Heptadecasphinganine	288.289	98.8948	Organic nitrogen compounds	Organonitrogen compounds	Amines	3.20281e+06	5.60973e+06	2.67855e+06	4.25332e+06	2.68574e+06	6.17345e+06	2.48838e+06	1.78717e+06	1.67291e+06	1.3882e+06	1.51089e+06	1.38398e+06	5.66918e+06	5.58804e+06	5.66919e+06
Hesperetin	303.104	634.582	Phenylpropanoids and polyketides	Flavonoids	O-methylated flavonoids	2.38946e+06	2.27353e+06	2.00665e+06	1.54111e+06	1.46935e+06	1.46312e+06	5.22822e+06	5.93196e+06	4.84518e+06	3.10746e+06	3.65573e+06	3.64846e+06	2.72652e+06	2.61628e+06	2.98682e+06
Hexaethylene glycol	283.174	112.03	Organic oxygen compounds	Organooxygen compounds	Ethers	4.66162e+06	4.62096e+06	4.91322e+06	4.9273e+06	4.20774e+06	3.95808e+06	4.25142e+06	4.4489e+06	3.64447e+06	5.18733e+06	4.82306e+06	5.0802e+06	4.61086e+06	4.66425e+06	4.74199e+06
Hexamethylenetetramine	141.113	398.349	Organoheterocyclic compounds	Triazinanes	1,3,5-triazinanes	1.41832e+06	1.54218e+06	1.46278e+06	1.39294e+06	1.18828e+06	1.39086e+06	1.51845e+06	1.44019e+06	1.27845e+06	1.4581e+06	1.50616e+06	1.58469e+06	1.23609e+06	1.26827e+06	1.26782e+06
Hexanamide, n-[(1s,2r)-2-hydroxy-1-(hydroxymethyl)heptadecyl]-6-[(7-nitro-2,1,3-benzoxadiazol-4-yl)amino]-	578.403	520.445	Lipids and lipid-like molecules	Sphingolipids	Ceramides	1.06703e+08	1.09382e+08	1.09873e+08	3.50796e+08	3.22892e+08	3.7037e+08	4.43943e+07	5.45717e+07	4.22041e+07	1.2033e+08	1.47766e+08	1.5893e+08	2.02554e+08	2.11173e+08	2.10909e+08
Hexanamide, n-[(1s,2r,3e)-2-hydroxy-1-(hydroxymethyl)-3-heptadecen-1-yl]-6-[(7-nitro-2,1,3-benzoxadiazol-4-yl)amino]-	576.388	522.664	Lipids and lipid-like molecules	Sphingolipids	Ceramides	7.44958e+06	7.63073e+06	7.76447e+06	1.98837e+07	1.94284e+07	2.19192e+07	3.43157e+06	4.25971e+06	3.06207e+06	8.83899e+06	1.08501e+07	1.15511e+07	1.2375e+07	1.28936e+07	1.28773e+07
Hexylamine	102.128	235.1	Organic nitrogen compounds	Organonitrogen compounds	Amines	1.84218e+08	1.89766e+08	1.9206e+08	7.73783e+07	7.50691e+07	7.837e+07	8.97962e+07	1.92009e+08	1.8646e+08	1.04367e+08	1.91165e+08	1.90116e+08	1.28454e+08	1.07994e+08	1.08831e+08
His-Ala-Lys	178.122	368.057	Organic acids and derivatives	Carboxylic acids and derivatives	Amino acids, peptides, and analogues	1.01811e+07	1.11352e+07	1.06868e+07	1.62922e+07	1.3243e+07	1.52839e+07	5.04025e+07	4.96239e+07	3.67054e+07	2.71734e+07	2.75732e+07	2.87227e+07	2.581e+07	2.67744e+07	2.69077e+07
His-Met	287.054	433.86	Phenylpropanoids and polyketides	Flavonoids	Flavones	2.93346e+07	2.89829e+07	2.81831e+07	3.06907e+07	3.08313e+07	2.93931e+07	2.18204e+07	3.29183e+07	2.16503e+07	1.74822e+07	2.6165e+07	2.58654e+07	3.23312e+07	3.25823e+07	3.91111e+07
Histamine	112.087	651.515	Organic nitrogen compounds	Organonitrogen compounds	Amines	4.53834e+08	5.96982e+08	4.73698e+08	5.63744e+08	6.29543e+08	7.40057e+08	6.10526e+08	7.32468e+08	6.23866e+08	3.86102e+08	6.83627e+08	6.20081e+08	6.77693e+08	6.54339e+08	6.54438e+08
Histidine	156.076	696.076	Organic acids and derivatives	Carboxylic acids and derivatives	Amino acids, peptides, and analogues	2.96998e+08	2.92435e+08	2.89262e+08	4.56495e+08	5.60912e+08	5.00133e+08	3.57232e+08	2.77425e+08	3.64244e+08	4.0001e+08	4.13305e+08	4.73657e+08	4.49063e+08	4.53893e+08	4.6135e+08
Homovanillic acid	183.061	260.697	Benzenoids	Phenols	Methoxyphenols	3.65691e+06	6.20908e+06	5.31881e+06	8.54931e+06	5.34898e+06	2.09951e+07	1.99835e+07	4.45907e+06	7.13176e+06	9.20475e+06	1.23898e+07	6.51077e+06	1.16083e+07	1.19075e+07	1.16072e+07
Huperzine b	240.137	130.744				9.32928e+06	1.04609e+07	9.48954e+06	7.20613e+06	6.76638e+06	8.17959e+06	2.19691e+07	2.4563e+07	2.1404e+07	1.22501e+07	1.11943e+07	1.32521e+07	1.23951e+07	1.24611e+07	1.5442e+07
Hydralazine	144.032	340.389	Organoheterocyclic compounds	Diazanaphthalenes	Benzodiazines	2.20408e+07	3.38225e+07	2.94781e+07	4.1466e+07	2.58871e+07	4.40968e+07	3.87732e+07	4.11412e+07	2.69746e+07	2.12277e+07	2.8606e+07	4.94895e+07	3.66709e+07	3.6721e+07	3.74863e+07
Hydramethylnon	495.182	396.41	Benzenoids	Benzene and substituted derivatives	Trifluoromethylbenzenes	2.74405e+06	2.52252e+06	2.37289e+06	2.45859e+06	2.12482e+06	1.41678e+06	2.74389e+06	3.14066e+06	2.40946e+06	2.2467e+06	3.82577e+06	3.32488e+06	2.91174e+06	3.02051e+06	3.02007e+06
Hydromorphone-3-.beta.-d-glucuronide	286.139	745.116				3.39828e+06	4.02323e+06	4.28417e+06	3.59704e+06	4.39896e+06	4.38266e+06	4.38514e+06	3.92008e+06	3.72813e+06	2.87861e+06	4.08419e+06	4.45208e+06	4.18463e+06	4.23591e+06	4.4422e+06
Hydroquinone	93.0371	82.1932	Benzenoids	Phenols	Benzenediols	2.04797e+06	2.15503e+06	2.08818e+06	852931	825755	854078	6.72862e+06	7.38965e+06	6.58086e+06	3.38546e+06	3.83885e+06	3.64562e+06	3.57408e+06	3.58346e+06	3.78e+06
Hydroxyflutamide	293.062	579.141	Benzenoids	Benzene and substituted derivatives	Trifluoromethylbenzenes	3.11763e+07	3.27216e+07	3.25713e+07	2.87743e+07	2.24051e+07	2.69346e+07	5.75993e+07	6.06881e+07	5.18335e+07	3.78103e+07	4.02525e+07	4.15772e+07	3.54076e+07	3.58182e+07	3.63338e+07
Hydroxyproline	132.021	512.459	Organic acids and derivatives	Carboxylic acids and derivatives	Amino acids, peptides, and analogues	5.94825e+06	3.90042e+06	6.45163e+06	3.49959e+06	3.44855e+06	3.8246e+06	5.31892e+06	5.77473e+06	4.62911e+06	3.59372e+06	3.89615e+06	4.38694e+06	3.15918e+06	3.17228e+06	3.33239e+06
Hyocholic acid	158.154	52.0652	Lipids and lipid-like molecules	Steroids and steroid derivatives	Bile acids, alcohols and derivatives	5.21351e+06	5.97088e+06	4.70589e+06	5.45254e+06	5.02801e+06	5.09905e+06	1.06054e+07	1.13526e+07	1.05305e+07	7.30579e+06	6.59078e+06	7.47897e+06	6.92271e+06	6.94979e+06	7.1705e+06
Hypotaurine	110.027	621.265	Organic acids and derivatives	Sulfinic acids and derivatives	Sulfinic acids	2.3662e+06	2.46549e+06	2.47467e+06	1.11997e+06	1.51383e+06	1.54248e+06	2.81493e+06	3.0107e+06	2.92136e+06	1.97488e+06	1.91586e+06	2.27232e+06	2.35805e+06	2.36354e+06	2.53387e+06
Hypoxanthine	137.045	375.004	Organoheterocyclic compounds	Imidazopyrimidines	Purines and purine derivatives	1.74901e+07	1.71501e+07	1.7418e+07	2.17357e+07	1.70453e+07	2.17042e+07	9.25523e+06	1.19297e+07	8.58422e+06	6.63916e+06	9.17833e+06	1.06042e+07	1.63986e+07	1.73164e+07	1.72647e+07
Icilin	312.122	61.1007	Benzenoids	Benzene and substituted derivatives	Nitrobenzenes	1.008e+08	1.12243e+08	6.78348e+07	1.43136e+08	1.29654e+08	1.38946e+08	1.47393e+08	1.51576e+08	1.3838e+08	1.17435e+08	1.44478e+08	1.50181e+08	1.35697e+08	1.36717e+08	1.44635e+08
Ile-Arg	288.202	601.534	Organic acids and derivatives	Carboxylic acids and derivatives	Amino acids, peptides, and analogues	6.68092e+06	5.91444e+06	4.20106e+06	4.79861e+06	5.93884e+06	5.70154e+06	6.27157e+06	7.07334e+06	5.67696e+06	5.16735e+06	4.42822e+06	4.29259e+06	4.60963e+06	4.55036e+06	4.0178e+06
Ile-His	269.16	531.904	Organic acids and derivatives	Carboxylic acids and derivatives	Amino acids, peptides, and analogues	1.32881e+07	1.32894e+07	1.34599e+07	1.21393e+07	1.36616e+07	1.17133e+07	1.31458e+07	1.53705e+07	1.35812e+07	8.97508e+06	1.23978e+07	1.39721e+07	1.34883e+07	1.35096e+07	1.50344e+07
Ile-Ile-Lys	187.132	172.39	Organic acids and derivatives	Carboxylic acids and derivatives	Amino acids, peptides, and analogues	1.03696e+07	1.09533e+07	1.08905e+07	7.34782e+06	5.77259e+06	7.51632e+06	1.4212e+07	1.2387e+07	1.45413e+07	1.051e+07	1.26022e+07	1.27044e+07	1.05122e+07	1.05123e+07	1.0343e+07
Ile-Lys	260.196	643.501	Organic acids and derivatives	Carboxylic acids and derivatives	Amino acids, peptides, and analogues	6.59634e+06	6.64452e+06	6.57772e+06	6.09434e+06	6.33721e+06	6.60758e+06	7.09045e+06	7.34746e+06	2.92986e+06	1.71762e+06	2.21519e+06	6.91038e+06	6.91939e+06	6.94797e+06	7.18544e+06
Ile-Pro-Ile	342.238	369.963	Organic acids and derivatives	Carboxylic acids and derivatives	Amino acids, peptides, and analogues	4.88165e+06	5.1269e+06	4.58488e+06	4.86072e+06	3.9739e+06	3.76608e+06	5.12835e+06	5.23833e+06	4.9081e+06	3.59841e+06	4.77001e+06	5.12556e+06	4.87059e+06	4.89983e+06	5.07716e+06
Ile-Ser	219.133	469.898	Organic acids and derivatives	Carboxylic acids and derivatives	Amino acids, peptides, and analogues	8.81407e+06	8.77851e+06	9.68347e+06	7.19923e+06	4.05008e+06	3.22557e+06	9.11991e+06	1.0327e+07	8.72606e+06	6.16588e+06	4.53491e+06	4.44038e+06	7.09125e+06	6.26321e+06	7.08933e+06
Imazapyr	220.081	661.084	Organic acids and derivatives	Carboxylic acids and derivatives	Amino acids, peptides, and analogues	1.95694e+06	2.19523e+06	2.1363e+06	2.47449e+06	1.99096e+06	2.79927e+06	3.06223e+06	3.73437e+06	2.96934e+06	2.59106e+06	2.75709e+06	3.38655e+06	2.52577e+06	2.61158e+06	2.53308e+06
Imazethapyr	248.112	757.923	Organic acids and derivatives	Carboxylic acids and derivatives	Amino acids, peptides, and analogues	3.7682e+07	4.25231e+07	3.75504e+07	3.72886e+07	2.87421e+07	3.28103e+07	4.60655e+07	5.98248e+07	4.32989e+07	3.42683e+07	3.97034e+07	4.31175e+07	4.35693e+07	4.36297e+07	4.63123e+07
Imibenconazole	124.999	707.91	Benzenoids	Benzene and substituted derivatives	Halobenzenes	3.99948e+06	3.87071e+06	3.97089e+06	3.79606e+06	3.84456e+06	3.94635e+06	3.01084e+06	3.70995e+06	2.80765e+06	2.62746e+06	3.38864e+06	3.76932e+06	3.74736e+06	3.85622e+06	3.85458e+06
Imidazole	69.034	678.363	Organoheterocyclic compounds	Azoles	Imidazoles	1.26461e+08	1.32073e+08	1.19446e+08	1.34234e+08	1.34624e+08	1.3128e+08	1.33499e+08	1.30262e+08	1.3233e+08	1.09327e+08	1.3354e+08	1.30022e+08	1.27513e+08	1.29931e+08	1.29869e+08
Imidazoleacetic acid	127.05	625.148	Organoheterocyclic compounds	Azoles	Imidazoles	9.30562e+06	1.0579e+07	1.04853e+07	744303	1.94078e+06	1.15271e+07	9.97202e+06	1.06735e+07	9.47241e+06	920066	2.12396e+06	1.15741e+07	9.03528e+06	9.50006e+06	9.4864e+06
Indole-3-acetonitrile	157.076	340.391	Organoheterocyclic compounds	Indoles and derivatives	Indoles	4.00977e+06	4.53697e+06	4.96268e+06	4.46402e+06	4.06959e+06	4.37603e+06	4.31942e+06	4.97882e+06	4.45137e+06	4.448e+06	4.36717e+06	5.09849e+06	4.32741e+06	4.4519e+06	4.45053e+06
Indole-3-carboxaldehyde	146.06	464.366	Organoheterocyclic compounds	Indoles and derivatives	Indoles	3.50085e+07	3.73948e+07	3.85936e+07	5.46896e+07	2.86318e+07	3.04985e+07	3.77102e+07	3.89115e+07	3.7291e+07	2.76247e+07	7.21838e+07	3.61551e+07	3.8166e+07	3.8346e+07	4.04033e+07
Indole-3-pyruvic acid	158.06	426.063	Organoheterocyclic compounds	Indoles and derivatives	Indolyl carboxylic acids and derivatives	2.03781e+06	2.24067e+06	2.19355e+06	1.93122e+06	2.00843e+06	2.1182e+06	3.76334e+06	4.05043e+06	3.3288e+06	1.90914e+06	2.77018e+06	3.04661e+06	2.26882e+06	2.25269e+06	2.21433e+06
Indolelactic acid	206.102	711.454	Organoheterocyclic compounds	Indoles and derivatives	Indolyl carboxylic acids and derivatives	2.07992e+07	1.97199e+07	1.74741e+07	1.57767e+07	1.50903e+07	1.66956e+07	2.81233e+07	3.22745e+07	2.80497e+07	1.91619e+07	2.49437e+07	2.35215e+07	2.30268e+07	2.3058e+07	2.36677e+07
Irigenin	361.067	724.947	Phenylpropanoids and polyketides	Isoflavonoids	O-methylated isoflavonoids	1.53995e+07	1.58999e+07	1.47579e+07	1.46782e+07	4.64217e+07	4.08468e+07	2.059e+07	2.83329e+07	2.1806e+07	9.62269e+06	2.43156e+07	2.67207e+07	2.81839e+07	2.89137e+07	2.89777e+07
Isatin	148.039	164.887	Organoheterocyclic compounds	Indoles and derivatives	Indolines	8.9503e+06	1.12542e+07	9.74373e+06	9.49978e+06	8.55208e+06	1.00239e+07	1.08096e+07	9.65221e+06	7.27853e+06	1.13739e+07	1.40981e+07	3.96059e+06	9.58247e+06	1.11659e+07	1.05635e+07
Isobergaptene	217.068	278.201	Phenylpropanoids and polyketides	Coumarins and derivatives	Furanocoumarins	2.62113e+07	3.2007e+07	2.44411e+07	2.47034e+07	1.71889e+07	1.75752e+07	3.70975e+07	3.38561e+07	3.14854e+07	2.04688e+07	2.04054e+07	2.07796e+07	2.16451e+07	2.27286e+07	2.27393e+07
Isoeugenol	137.059	210.006	Benzenoids	Phenols	Methoxyphenols	1.13661e+07	1.00118e+07	1.13447e+07	1.02358e+07	1.13399e+07	1.42134e+07	1.9796e+07	2.58087e+07	2.72638e+07	1.34825e+07	1.49402e+07	1.58935e+07	1.57225e+07	1.63865e+07	1.57452e+07
Isoliquiritigenin	257.073	406.319	Phenylpropanoids and polyketides	Linear 1,3-diarylpropanoids	Chalcones and dihydrochalcones	1.75388e+06	1.59718e+06	1.7461e+06	1.78181e+06	1.91297e+06	1.76352e+06	270458	2.1156e+06	2.11182e+06	1.99297e+06	1.05307e+06	1.40381e+06	1.75093e+06	1.96024e+06	1.77876e+06
Isomethiozin	291.104	498.99	Organosulfur compounds	Thioethers	Aryl thioethers	3.51538e+07	3.58291e+07	3.52862e+07	3.09325e+07	2.94973e+07	2.84112e+07	4.67856e+07	5.23659e+07	4.71741e+07	4.95176e+07	5.71256e+07	5.90153e+07	4.98346e+07	5.09528e+07	5.09425e+07
Isoniazid	138.091	254.054	Organoheterocyclic compounds	Pyridines and derivatives	Pyridinecarboxylic acids and derivatives	1.12819e+07	1.16914e+07	9.23057e+06	9.22808e+06	9.12682e+06	8.62437e+06	1.29368e+07	1.39492e+07	1.40647e+07	1.14639e+07	1.3509e+07	1.3939e+07	1.22681e+07	1.22744e+07	1.25333e+07
Isopentenyl-adenine-7-glucoside	366.176	333.982				4.2743e+06	4.62277e+06	4.25366e+06	5.93477e+06	6.47628e+06	6.01064e+06	6.44614e+06	5.9587e+06	6.07834e+06	4.73753e+06	5.63944e+06	5.34967e+06	5.78348e+06	5.78306e+06	6.08743e+06
Isopimpinellin	269.039	640.404	Phenylpropanoids and polyketides	Coumarins and derivatives	Furanocoumarins	2.76773e+06	2.84621e+06	2.82512e+06	3.02714e+06	1.92928e+06	3.03872e+06	2.08647e+06	1.95152e+06	2.15732e+06	1.71575e+06	1.96374e+06	1.56822e+06	2.15889e+06	2.20523e+06	2.15864e+06
Isoproterenol	194.117	594.247	Benzenoids	Phenols	Benzenediols	3.55246e+07	2.18052e+07	2.4577e+07	2.05532e+07	1.06989e+07	2.47471e+07	2.99552e+07	2.54128e+07	2.00943e+07	2.33911e+07	2.90626e+07	2.38446e+07	1.66498e+07	2.10215e+07	2.09844e+07
Isoquinoline n-oxide	291.106	212.618				4.36888e+07	4.42718e+07	4.11302e+07	2.30773e+07	2.52893e+07	2.42714e+07	8.06926e+07	9.23054e+07	8.454e+07	5.14637e+07	6.30475e+07	6.61578e+07	5.86854e+07	5.87072e+07	6.05784e+07
Isoxaflutole	360.069	745.616	Organic oxygen compounds	Organooxygen compounds	Carbonyl compounds	932163	1.27081e+06	951712	960904	5.60893e+06	5.40861e+06	1.5606e+06	2.22796e+06	1.64403e+06	421180	2.42555e+06	2.30858e+06	2.41124e+06	2.56599e+06	2.59434e+06
Jasmine lactone	229.143	92.9026				6.30369e+06	5.09515e+06	4.26669e+06	6.20445e+06	5.65339e+06	4.15245e+06	8.21723e+06	6.79564e+06	8.93811e+06	5.08982e+06	5.42621e+06	5.54608e+06	5.69766e+06	6.06817e+06	5.79543e+06
Juglone	175.023	923.053	Benzenoids	Naphthalenes	Naphthoquinones	2.02606e+06	2.35562e+06	2.21677e+06	2.331e+06	2.22543e+06	2.33697e+06	2.90333e+06	2.45103e+06	2.29477e+06	1.8216e+06	1.90806e+06	2.83379e+06	3.69886e+06	3.8852e+06	3.28669e+06
Kaempferol	287.057	531.071	Phenylpropanoids and polyketides	Flavonoids	Flavones	1.16591e+07	7.7276e+06	7.70512e+06	3.72391e+06	5.14776e+06	4.18329e+06	5.3124e+06	7.86044e+06	6.10068e+06	6.48284e+06	3.01561e+06	2.15081e+06	1.15351e+07	1.19817e+07	1.19719e+07
Ketamine	238.091	661.158				9.2712e+06	1.02063e+07	9.92129e+06	1.07887e+07	9.22257e+06	1.15568e+07	1.38487e+07	1.53676e+07	1.2722e+07	1.19624e+07	1.30647e+07	1.47748e+07	1.1422e+07	1.20637e+07	1.14227e+07
Lactitol	367.135	253.865	Lipids and lipid-like molecules	Fatty Acyls	Fatty acyl glycosides	5.33837e+06	6.13989e+06	8.11459e+06	6.66981e+06	7.36963e+06	7.02e+06	1.14037e+07	1.39344e+07	1.15183e+07	7.87401e+06	6.90403e+06	7.15632e+06	7.59393e+06	7.79585e+06	7.79668e+06
Lactose	365.104	734.962	Organic oxygen compounds	Organooxygen compounds	Carbohydrates and carbohydrate conjugates	7.17125e+07	7.01019e+07	6.64428e+07	7.07584e+07	6.71077e+07	7.03045e+07	9.30511e+07	1.01758e+08	9.10656e+07	6.60697e+07	8.78415e+07	8.21689e+07	6.75108e+07	6.76576e+07	7.33176e+07
L-Asparagine	133.061	809.498				1.45076e+06	1.52319e+06	1.67116e+06	2.34432e+06	2.48893e+06	2.44219e+06	1.56761e+06	2.76409e+06	1.62114e+06	1.88321e+06	2.16068e+06	2.14206e+06	2.35988e+06	2.36409e+06	2.63587e+06
L-Aspartate	134.044	867.932	Organic acids and derivatives	Carboxylic acids and derivatives	"Amino acids, peptides, and analogues"	7.07568e+06	1.08919e+07	6.14306e+06	5.83358e+06	6.05426e+06	4.76983e+06	6.2491e+06	7.76413e+06	1.2004e+07	5.76668e+06	7.87974e+06	7.00887e+06	6.9422e+06	7.07207e+06	7.07084e+06
L-aspartic acid	134.044	809.129	Organic acids and derivatives	Carboxylic acids and derivatives	Amino acids, peptides, and analogues	7.92774e+06	8.55331e+06	8.81303e+06	9.58648e+06	1.23136e+07	1.34948e+07	9.14527e+06	1.01962e+07	8.3584e+06	9.31747e+06	1.18355e+07	1.04386e+07	1.09266e+07	1.10817e+07	1.10806e+07
Lauryldimethylamine oxide	230.247	247.051	Organic nitrogen compounds	Organonitrogen compounds	Aminoxides	2.30523e+07	2.31947e+07	1.45797e+07	1.66965e+07	1.65828e+07	1.85207e+07	3.23756e+07	3.6476e+07	2.91053e+07	2.03318e+07	1.62918e+07	1.38156e+07	2.23463e+07	2.24425e+07	2.324e+07
L-citrulline	176.094	117.672	Organic acids and derivatives	Carboxylic acids and derivatives	Amino acids, peptides, and analogues	1.0914e+08	9.6709e+07	9.7433e+07	1.83269e+08	3.58788e+07	8.41205e+07	1.03324e+08	1.32246e+08	9.61815e+07	9.05982e+07	1.53768e+08	1.39225e+08	9.02809e+07	9.30144e+07	9.4971e+07
L-deprenyl	119.085	214.18	Benzenoids	Benzene and substituted derivatives	Phenethylamines	9.92545e+06	1.49556e+07	1.54889e+07	1.17608e+07	2.2053e+07	1.68281e+07	2.73069e+07	1.30414e+07	2.08573e+07	2.25866e+07	1.63711e+07	3.55688e+07	1.25692e+07	1.25781e+07	1.30532e+07
Leu-Ala	203.138	407.347	Organic acids and derivatives	Carboxylic acids and derivatives	Amino acids, peptides, and analogues	1.21437e+07	1.25671e+07	1.1973e+07	1.01071e+07	9.76362e+06	1.62955e+07	1.10053e+07	1.05906e+07	1.1945e+07	7.95831e+06	1.17915e+07	1.18163e+07	1.21421e+07	1.27401e+07	1.27376e+07
Leucylleucine	245.185	315.937	Organic acids and derivatives	Carboxylic acids and derivatives	Amino acids, peptides, and analogues	1.03667e+08	9.89063e+07	1.04702e+08	9.65522e+07	8.97248e+07	7.71876e+07	9.86243e+07	1.03268e+08	9.77154e+07	8.7217e+07	9.25863e+07	1.02117e+08	9.66468e+07	9.8992e+07	9.89866e+07
Leu-Glu	261.144	666.163	Organic acids and derivatives	Carboxylic acids and derivatives	Amino acids, peptides, and analogues	4.00322e+06	3.90506e+06	5.16616e+06	3.79288e+06	3.61945e+06	3.4364e+06	3.99611e+06	3.62687e+06	3.76776e+06	2.45231e+06	3.59741e+06	5.23288e+06	3.46468e+06	3.52604e+06	4.17048e+06
Leu-Gly-Leu	302.206	349.949	Organic acids and derivatives	Carboxylic acids and derivatives	Amino acids, peptides, and analogues	8.7876e+06	8.56301e+06	8.20161e+06	8.31726e+06	7.3915e+06	7.88053e+06	8.03128e+06	8.63178e+06	8.32672e+06	6.84111e+06	8.80401e+06	9.34083e+06	8.91964e+06	8.97539e+06	9.52478e+06
Leu-Ile-Arg	401.275	350.318	Organic acids and derivatives	Carboxylic acids and derivatives	Amino acids, peptides, and analogues	2.80625e+06	2.91138e+06	3.06349e+06	3.82412e+06	2.29099e+06	3.00116e+06	2.9234e+06	2.85496e+06	2.68396e+06	2.01082e+06	2.45459e+06	2.80704e+06	2.88013e+06	2.89077e+06	3.34218e+06
Leu-Met	263.142	319.966	Organic acids and derivatives	Carboxylic acids and derivatives	Amino acids, peptides, and analogues	3.32599e+07	3.32901e+07	3.43586e+07	2.80777e+07	3.27693e+07	2.70774e+07	3.1981e+07	3.24128e+07	3.23432e+07	2.84628e+07	2.89266e+07	3.33911e+07	3.34895e+07	3.43212e+07	3.43108e+07
Leu-Phe	279.17	294.408	Organic acids and derivatives	Carboxylic acids and derivatives	Amino acids, peptides, and analogues	6.4943e+07	5.64249e+07	7.07793e+07	4.7946e+07	4.61641e+07	4.7095e+07	4.62566e+07	6.4666e+07	4.79548e+07	4.53065e+07	5.18658e+07	6.36302e+07	5.30753e+07	5.47387e+07	5.3225e+07
Leu-Tyr	295.164	352.205	Organic acids and derivatives	Carboxylic acids and derivatives	Amino acids, peptides, and analogues	1.31765e+07	1.27715e+07	1.27269e+07	1.36126e+07	1.1922e+07	1.30666e+07	1.27725e+07	1.22751e+07	1.20949e+07	1.07522e+07	1.26551e+07	1.37624e+07	1.27269e+07	1.31764e+07	1.31592e+07
Lewis a trisaccharide	512.174	786.222	Lipids and lipid-like molecules	Fatty Acyls	Fatty acyl glycosides	1.97908e+06	1.9516e+06	1.89722e+06	2.06816e+06	1.95011e+06	2.23835e+06	1.33194e+06	1.46109e+06	842414	1.13887e+06	1.6325e+06	2.18771e+06	2.07784e+06	2.08838e+06	2.19961e+06
L-Glutamate	148.06	639.326	Organic acids and derivatives	Carboxylic acids and derivatives	"Amino acids, peptides, and analogues"	52057.9	54063.5	55796.9	531106	231883	332847	78217.7	81798.7	70872.2	116860	583890	142600	294761	536988	264922
L-glutamic acid, dimethyl ester	144.065	156.578	Organic acids and derivatives	Carboxylic acids and derivatives	Amino acids, peptides, and analogues	1.42723e+08	1.17405e+08	1.25493e+08	9.45206e+07	1.18743e+08	9.41487e+07	1.02054e+08	8.76947e+07	8.34835e+07	9.29641e+07	1.17673e+08	1.01578e+08	1.13926e+08	1.14285e+08	1.198e+08
L-Glutamine	147.076	962.857	Organic acids and derivatives	Carboxylic acids and derivatives	"Amino acids, peptides, and analogues"	1.82139e+07	2.32514e+07	1.67065e+07	7.66962e+06	6.05213e+06	5.06572e+06	4.39312e+07	1.52336e+07	8.33055e+06	2.0569e+07	1.52098e+07	4.94287e+07	1.52488e+07	1.35861e+07	1.68628e+07
L-histidinol	142.086	492.153	Organic nitrogen compounds	Organonitrogen compounds	Amines	4.37323e+07	4.34286e+07	4.30264e+07	4.45187e+07	4.37496e+07	4.82079e+07	4.56069e+07	4.49658e+07	4.20018e+07	2.38849e+07	2.90628e+07	3.44628e+07	4.24017e+07	4.41366e+07	4.407e+07
L-homoarginine	144.138	420.61	Organic acids and derivatives	Carboxylic acids and derivatives	Amino acids, peptides, and analogues	2.60888e+07	1.9416e+07	2.74619e+07	2.61155e+07	9.6131e+06	9.54152e+06	2.96639e+07	3.35722e+07	3.03646e+07	3.07713e+07	3.30851e+07	3.37608e+07	2.54977e+07	2.45155e+07	2.54786e+07
L-homocitrulline	190.097	436.846	Organic acids and derivatives	Carboxylic acids and derivatives	Amino acids, peptides, and analogues	1.03741e+08	1.02676e+08	1.09208e+08	1.42755e+08	1.00351e+08	9.45038e+07	2.70022e+08	1.78662e+08	2.80531e+08	2.08967e+08	2.18455e+08	1.42121e+08	1.38438e+08	1.38447e+08	1.41048e+08
L-homocystine	269.074	278.243	Organic acids and derivatives	Carboxylic acids and derivatives	Amino acids, peptides, and analogues	7.61658e+06	9.15747e+06	8.97106e+06	8.95058e+06	9.45347e+06	8.9624e+06	9.01379e+06	9.34462e+06	8.98906e+06	1.0246e+07	9.70718e+06	1.136e+07	8.19927e+06	9.12606e+06	9.11044e+06
L-homoserine	120.043	454.596	Organic acids and derivatives	Carboxylic acids and derivatives	Amino acids, peptides, and analogues	3.74256e+07	3.6868e+07	2.31155e+07	3.36344e+07	3.50845e+07	3.45051e+07	2.65176e+07	3.68717e+07	2.76981e+07	2.27322e+07	3.46285e+07	3.11816e+07	3.62793e+07	3.84529e+07	3.84694e+07
Linalool oxide	153.127	276.709				1.67057e+07	1.70988e+07	1.12174e+07	1.28408e+07	1.48271e+07	9.10719e+06	1.40641e+07	1.81947e+07	1.33234e+07	1.13254e+07	1.25242e+07	1.31477e+07	1.63879e+07	1.53279e+07	1.63665e+07
Linoleoyl ethanolamide	324.289	54.1077	Organic nitrogen compounds	Organonitrogen compounds	Amines	1.13864e+06	752841	310141	1.0324e+06	534459	436569	9.00795e+06	878174	3.9435e+06	548053	657819	511055	1.74056e+06	1.80678e+06	1.8071e+06
Linuron	249.036	500.937	Benzenoids	Benzene and substituted derivatives	N-phenylureas	3.3e+07	3.49433e+07	3.43246e+07	1.78676e+07	1.82188e+07	1.74473e+07	3.72527e+07	4.06258e+07	3.32576e+07	1.84411e+07	1.80342e+07	1.92081e+07	1.76135e+07	1.80168e+07	1.80105e+07
L-leucyl-l-proline	229.143	57.1675	Organic acids and derivatives	Carboxylic acids and derivatives	Amino acids, peptides, and analogues	8.69549e+06	9.76707e+06	1.25864e+07	8.61636e+06	9.41171e+06	1.0973e+07	1.42258e+07	1.26972e+07	1.40326e+07	1.47743e+07	1.29292e+07	1.39974e+07	1.32347e+07	1.32603e+07	1.38836e+07
L-Lysine	147.112	1179.02	Organic acids and derivatives	Carboxylic acids and derivatives	"Amino acids, peptides, and analogues"	289925	305130	2520.78	254547	306524	274367	275846	308835	267340	294258	294196	295183	116315	100851	161962
L-methionine	150.058	505.626	Organic acids and derivatives	Carboxylic acids and derivatives	Amino acids, peptides, and analogues	4.04357e+07	3.94022e+07	4.00699e+07	2.28283e+07	3.05101e+07	2.83299e+07	3.89728e+07	3.83295e+07	181114	148321	3.98549e+07	184568	4.18374e+07	4.18279e+07	4.47482e+07
L-n5-(1-imino-3-pentenyl)ornithine	214.179	331.288	Organic acids and derivatives	Carboxylic acids and derivatives	Amino acids, peptides, and analogues	3.41349e+06	3.59923e+06	3.434e+06	2.69703e+06	2.25896e+06	2.44663e+06	3.32359e+06	3.91679e+06	3.19021e+06	3.3428e+06	3.20059e+06	3.13671e+06	3.17225e+06	3.32505e+06	3.31727e+06
Lontrel	191.982	555.55	Organoheterocyclic compounds	Pyridines and derivatives	Pyridinecarboxylic acids and derivatives	4.99346e+07	5.12288e+07	5.08455e+07	4.33047e+07	2.92859e+07	3.02345e+07	5.72939e+07	6.24546e+07	5.99202e+07	6.76816e+07	6.75543e+07	6.30201e+07	4.98668e+07	5.17728e+07	5.17446e+07
Lpc 18:1	522.352	323.807	Lipids and lipid-like molecules	Glycerophospholipids	Glycerophosphocholines	1.11718e+07	1.15522e+07	1.06647e+07	8.80744e+06	6.23456e+06	5.25187e+06	1.05972e+07	1.07397e+07	9.83451e+06	8.80627e+06	1.01717e+07	8.09988e+06	9.06274e+06	9.5896e+06	9.58916e+06
Lpc 18:2	520.338	327.096	Lipids and lipid-like molecules	Glycerophospholipids	Glycerophosphocholines	6.02444e+07	6.3975e+07	5.62197e+07	5.87492e+07	4.26292e+07	3.45617e+07	3.83681e+07	3.60042e+07	3.424e+07	6.09442e+07	6.59524e+07	5.44032e+07	4.91498e+07	4.98264e+07	4.98228e+07
L-pipecolic acid	130.086	971.557	Organic acids and derivatives	Carboxylic acids and derivatives	Amino acids, peptides, and analogues	5.75792e+07	8.3943e+07	8.34278e+07	8.68601e+07	7.77819e+07	6.49924e+07	7.61768e+07	8.7633e+07	6.84179e+07	7.75927e+07	1.1138e+08	8.56957e+07	7.49532e+07	7.63331e+07	7.63367e+07
L-Proline	116.071	862.327	Organic acids and derivatives	Carboxylic acids and derivatives	"Amino acids, peptides, and analogues"	1.24579e+07	3.32016e+06	1.29573e+07	1.50726e+07	1.35322e+07	1.55341e+07	2.97093e+06	5.82542e+06	4.16493e+06	1.07233e+07	1.29369e+07	1.41539e+07	1.3476e+07	1.38961e+07	1.40823e+07
L-saccharopine	277.138	851.086	Organic acids and derivatives	Carboxylic acids and derivatives	Amino acids, peptides, and analogues	2.33314e+06	2.31345e+06	2.63968e+06	2.71805e+06	3.06426e+06	2.98345e+06	3.34268e+06	3.65798e+06	3.38136e+06	2.44023e+06	3.45953e+06	3.37197e+06	3.07629e+06	3.09562e+06	3.2289e+06
L-Serine	106.05	735.226	Organic acids and derivatives	Carboxylic acids and derivatives	"Amino acids, peptides, and analogues"	1.63781e+07	8.65564e+06	7.61738e+06	3.85028e+06	8.80891e+06	7.16725e+06	2.95117e+06	1.37885e+07	8.22229e+06	1.93352e+07	1.48065e+07	2.02529e+07	1.09153e+07	8.59749e+06	1.29043e+07
L-theanine	175.086	91.7375	Organic acids and derivatives	Carboxylic acids and derivatives	Amino acids, peptides, and analogues	3.14735e+07	3.22198e+07	7.8298e+06	3.91519e+07	2.74851e+07	1.90191e+07	3.39295e+07	1.00786e+07	3.30229e+07	3.07188e+07	9.86418e+06	1.06032e+07	2.45982e+07	2.27576e+07	2.27869e+07
L-tryptophanamide	187.111	176.738	Organoheterocyclic compounds	Indoles and derivatives	Tryptamines and derivatives	5.56454e+06	6.51398e+06	5.75633e+06	4.44366e+06	4.23823e+06	4.43366e+06	7.0892e+06	8.56837e+06	7.26837e+06	6.52797e+06	5.85334e+06	5.93357e+06	5.68422e+06	5.84638e+06	5.8514e+06
L-Tyrosine	182.081	599.905				3.07956e+06	2.23925e+06	2.52807e+06	2.11464e+06	3.35019e+06	2.25051e+06	2.54578e+06	1.95166e+06	2.40357e+06	2.20215e+06	2.21436e+06	3.28463e+06	2.74235e+06	2.33729e+06	2.65043e+06
L-tyrosine, n-(2-benzoylphenyl)-o-[2-(methyl-2-pyridinylamino)ethyl]-	496.2	786.243	Organic acids and derivatives	Carboxylic acids and derivatives	Amino acids, peptides, and analogues	3.24594e+06	2.99322e+06	3.11935e+06	3.67797e+06	3.12494e+06	3.48349e+06	2.39716e+06	2.45691e+06	1.51931e+06	2.39434e+06	2.83276e+06	3.2603e+06	3.4366e+06	3.48728e+06	3.53629e+06
Lys-Ala	218.149	801.566	Organic acids and derivatives	Carboxylic acids and derivatives	Amino acids, peptides, and analogues	7.70899e+06	7.55953e+06	7.28881e+06	7.60066e+06	7.35316e+06	7.0627e+06	7.31487e+06	8.00548e+06	7.18072e+06	5.00583e+06	6.63035e+06	7.48574e+06	7.26532e+06	7.49664e+06	7.49153e+06
Maackiaine	285.068	760.595	Phenylpropanoids and polyketides	Isoflavonoids	Furanoisoflavonoids	2.80416e+07	2.71875e+07	2.63511e+07	3.34927e+07	2.75358e+07	3.27155e+07	3.34474e+07	3.86565e+07	3.31729e+07	3.3154e+07	3.32185e+07	3.1819e+07	3.14763e+07	3.15929e+07	3.25567e+07
Malonyltryptophan	291.097	591.796	Organic acids and derivatives	Carboxylic acids and derivatives	Amino acids, peptides, and analogues	2.48508e+06	2.41275e+06	2.59426e+06	3.12662e+06	2.94863e+06	3.19414e+06	7.04905e+06	8.88962e+06	6.56015e+06	7.16146e+06	9.18677e+06	1.0106e+07	5.98259e+06	6.42573e+06	6.39118e+06
Maltose	325.112	633.597	Lipids and lipid-like molecules	Fatty Acyls	Fatty acyl glycosides	4.58548e+07	4.89243e+07	4.6576e+07	4.28784e+07	3.82122e+07	4.69118e+07	4.91535e+07	5.32717e+07	5.05674e+07	5.19844e+07	5.08442e+07	5.02711e+07	4.8811e+07	5.08875e+07	5.07396e+07
Mandelonitrile	134.081	99.3524	Benzenoids	Benzene and substituted derivatives		1.08915e+08	1.14189e+08	9.32295e+07	1.26272e+08	1.19345e+08	1.17184e+08	8.2969e+07	1.03694e+08	8.44482e+07	3.15365e+07	1.20824e+08	9.79402e+07	9.29562e+07	9.36434e+07	1.01951e+08
Mangiferin	423.088	497.31	Organoheterocyclic compounds	Benzopyrans	1-benzopyrans	3.93096e+06	4.43657e+06	4.2459e+06	3.58828e+06	3.21532e+06	3.66025e+06	3.99667e+06	4.58622e+06	3.8787e+06	2.77165e+06	3.43383e+06	3.64731e+06	2.83478e+06	2.84066e+06	2.99782e+06
Matairesinol	376.159	194.799	Lignans, neolignans and related compounds	Furanoid lignans	Tetrahydrofuran lignans	7.95874e+06	8.1717e+06	8.64031e+06	1.23966e+07	1.29673e+07	1.32694e+07	5.62949e+06	7.53912e+06	7.97516e+06	1.29488e+07	1.14665e+07	1.47102e+07	1.00369e+07	1.00341e+07	9.53719e+06
Melamine	127.098	950.183	Organoheterocyclic compounds	Triazines	1,3,5-triazines	1.18895e+07	1.71469e+07	1.2919e+07	1.54638e+07	1.20496e+07	1.12052e+07	1.03447e+07	1.20328e+07	1.35358e+07	1.21618e+07	1.31293e+07	1.25561e+07	1.24864e+07	1.49278e+07	1.27252e+07
Melatonin	174.091	313.326	Organoheterocyclic compounds	Indoles and derivatives	Indoles	2.09283e+07	2.04638e+07	2.20602e+07	1.54043e+07	1.77296e+07	1.8225e+07	2.15897e+07	2.23094e+07	2.01574e+07	1.73607e+07	2.07203e+07	2.03962e+07	2.10063e+07	2.19769e+07	2.19526e+07
Melibiose	365.104	664.265	Lipids and lipid-like molecules	Fatty Acyls	Fatty acyl glycosides	6.13904e+07	6.13184e+07	6.40588e+07	6.18882e+07	5.0822e+07	5.401e+07	5.43788e+07	5.82706e+07	4.92732e+07	6.54254e+07	5.95523e+07	5.93188e+07	5.54085e+07	5.54567e+07	5.61054e+07
Menadione	145.051	117.812	Benzenoids	Naphthalenes	Naphthoquinones	3.01718e+06	3.01874e+06	2.68812e+06	6.40535e+06	2.97441e+06	2.97356e+06	3.19411e+06	3.0174e+06	3.26741e+06	2.84645e+06	3.4175e+06	4.75689e+06	2.87691e+06	3.38828e+06	3.39274e+06
Menthofuran	151.111	164.377	Lipids and lipid-like molecules	Prenol lipids	Monoterpenoids	9.47642e+06	1.16739e+07	1.10769e+07	1.69247e+07	1.78841e+07	2.07031e+07	9.73662e+06	1.92191e+07	9.66835e+06	1.82632e+07	1.26518e+07	1.60646e+07	1.41214e+07	1.17997e+07	1.40595e+07
Mesaconic acid	131.034	743.152	Lipids and lipid-like molecules	Fatty Acyls	Fatty acids and conjugates	1.7669e+07	1.70817e+07	1.55423e+07	1.17463e+07	1.22237e+07	1.25402e+07	2.30099e+07	2.49295e+07	2.34507e+07	1.61279e+07	1.99957e+07	1.955e+07	1.93974e+07	2.00392e+07	2.00307e+07
Metalaxyl	280.138	792.511	Organic acids and derivatives	Carboxylic acids and derivatives	Amino acids, peptides, and analogues	2.2586e+06	2.40944e+06	2.28803e+06	3.23992e+06	2.84262e+06	3.18495e+06	3.18373e+06	3.27305e+06	3.043e+06	3.27572e+06	3.29307e+06	3.63604e+06	3.09889e+06	3.14797e+06	3.22424e+06
Methanimidamide, n'-(4-butyl-2-methylphenyl)-n-hydroxy-	207.148	422.025	Benzenoids	Benzene and substituted derivatives	Toluenes	5.27452e+07	5.68447e+07	4.94713e+07	6.29758e+07	6.81221e+07	6.41914e+07	7.02318e+07	6.28713e+07	6.81866e+07	4.12187e+07	6.69025e+07	6.74287e+07	6.47735e+07	6.53047e+07	6.89467e+07
Methanone, [1-(5-hydroxypentyl)-1h-indol-3-yl](4-methyl-1-naphthalenyl)-	372.187	807.518	Organoheterocyclic compounds	Indoles and derivatives	Naphthoylindoles	1.20222e+06	1.27898e+06	1.23135e+06	1.23925e+06	1.00874e+06	1.18508e+06	1.69927e+06	1.88806e+06	1.57239e+06	1.16659e+06	1.63808e+06	1.75372e+06	1.22777e+06	1.2554e+06	1.25559e+06
Methanone, [1-(6-fluorohexyl)-1h-indol-3-yl]-1-naphthalenyl-	155.042	690.266	Organoheterocyclic compounds	Indoles and derivatives	Naphthoylindoles	8.40288e+06	8.48331e+06	8.38162e+06	8.92458e+06	1.8549e+07	7.15786e+06	8.171e+06	9.77234e+06	2.18461e+07	7.56745e+06	9.294e+06	9.07598e+06	8.537e+06	8.47833e+06	8.5935e+06
Methimazole	115.054	340.394	Organoheterocyclic compounds	Azolines	Imidazolines	1.83025e+07	1.89675e+07	1.80814e+07	1.55736e+07	1.60716e+07	1.50866e+07	1.80939e+07	2.07158e+07	1.88019e+07	1.64637e+07	1.88933e+07	1.86778e+07	1.79978e+07	1.84773e+07	1.84596e+07
Methionine sulfoxide	166.053	671.238	Organic acids and derivatives	Carboxylic acids and derivatives	Amino acids, peptides, and analogues	1.16866e+07	1.22547e+07	1.14127e+07	1.23417e+07	6.79168e+06	9.30664e+06	1.2712e+07	1.34452e+07	1.19167e+07	1.13024e+07	1.4865e+07	1.60664e+07	1.17783e+07	1.18091e+07	1.22656e+07
Methoxsalen	217.068	321.723	Phenylpropanoids and polyketides	Coumarins and derivatives	Furanocoumarins	2.68324e+06	2.84875e+06	3.1785e+06	5.53481e+06	5.25584e+06	4.20363e+06	3.6312e+06	3.38963e+06	5.20694e+06	3.97186e+06	4.44004e+06	3.95549e+06	4.48736e+06	4.53321e+06	5.22253e+06
Methyl (1r,4as,9s,10s)-10-acetyloxy-5,9-dihydroxy-1,4a-dimethyl-2-oxo-7-propan-2-yl-10,10a-dihydro-9h-phenanthrene-1-carboxylate	439.195	362.702	Lipids and lipid-like molecules	Steroids and steroid derivatives	Hydroxysteroids	4.95421e+06	5.50085e+06	5.01661e+06	7.05531e+06	6.03052e+06	7.12102e+06	7.76002e+06	6.84616e+06	6.77031e+06	7.10573e+06	8.37743e+06	8.70572e+06	7.01878e+06	7.3274e+06	7.31699e+06
Methyl 4,6-o-benzylidene-.alpha.-d-glucopyranoside	107.049	454.447				1.38583e+07	1.54988e+07	1.45588e+07	1.44706e+07	1.59675e+07	1.52391e+07	1.02492e+07	1.14412e+07	1.05298e+07	1.02071e+07	1.38998e+07	1.51872e+07	1.53905e+07	1.55469e+07	1.60436e+07
Methyl 5(s),6(r)-7-trihydroxyheptanoate	125.06	492.186	Lipids and lipid-like molecules	Fatty Acyls	Fatty alcohols	7.59103e+06	7.47069e+06	7.30684e+06	8.1285e+06	7.85928e+06	8.56089e+06	7.94091e+06	8.06448e+06	7.12695e+06	4.37154e+06	5.33471e+06	6.15933e+06	7.74958e+06	7.77168e+06	8.35773e+06
Methylguanidine	74.0787	308.441	Organic nitrogen compounds	Organonitrogen compounds	Guanidines	4.95786e+09	1.60509e+07	2.9328e+07	5.61938e+07	4.17725e+09	1.95039e+07	4.69219e+09	6.1819e+07	4.80138e+09	1.5996e+07	4.21134e+09	4.37826e+07	3.95016e+07	4.63491e+07	4.62109e+07
Methyl jasmonate	207.137	256.3	Lipids and lipid-like molecules	Fatty Acyls	Lineolic acids and derivatives	2.13719e+07	2.24835e+07	2.00922e+07	2.32911e+07	2.20154e+07	3.26627e+07	2.99481e+07	3.33098e+07	3.32001e+07	3.07943e+07	3.25273e+07	3.4303e+07	3.03293e+07	2.96947e+07	2.97269e+07
Methylphosphonic acid	97.0285	448.534	Organic acids and derivatives	Organic phosphonic acids and derivatives	Organic phosphonic acids	2.2919e+08	2.39652e+08	2.0626e+08	1.87467e+08	1.70583e+08	2.14269e+08	1.88196e+08	2.20189e+08	2.75402e+08	1.57916e+08	2.27911e+08	1.94607e+08	2.01377e+08	2.04826e+08	2.50313e+08
Methyl salicylate .beta.-d-o-glucuronide methyl ester	365.064	745.533	Organic oxygen compounds	Organooxygen compounds	Carbohydrates and carbohydrate conjugates	5.01418e+06	6.07351e+06	4.95748e+06	6.70363e+06	7.08963e+06	8.71584e+06	6.79653e+06	5.81586e+06	5.4112e+06	3.76277e+06	6.83756e+06	5.88768e+06	6.07839e+06	6.12501e+06	6.4713e+06
Methyltyrosinate	196.096	58.5765	Organic acids and derivatives	Carboxylic acids and derivatives	Amino acids, peptides, and analogues	1.84922e+06	1.91124e+06	2.07331e+06	1.99986e+06	1.55768e+06	1.68623e+06	2.14693e+06	2.14382e+06	1.7954e+06	1.83835e+06	2.30131e+06	1.9786e+06	1.89251e+06	1.89687e+06	1.96006e+06
Metribuzin	187.086	167.134	Organosulfur compounds	Thioethers	Aryl thioethers	1.95046e+07	2.00181e+07	1.94419e+07	1.98255e+07	1.47019e+07	1.70051e+07	2.43474e+07	3.16706e+07	2.56142e+07	1.99554e+07	2.43007e+07	2.7392e+07	1.92546e+07	1.93575e+07	2.00531e+07
Metronidazole	172.071	753.917	Organoheterocyclic compounds	Azoles	Imidazoles	9.79672e+06	9.3939e+06	9.2472e+06	1.0524e+07	1.00651e+07	1.06408e+07	1.04855e+07	1.14625e+07	1.06994e+07	9.34728e+06	1.05198e+07	1.08841e+07	1.07919e+07	1.10386e+07	1.10331e+07
MG(18:2(9Z,12Z)/0:0/0:0)[rac]	337.272	337.768				2.32949e+06	2.39547e+06	1.989e+06	2.18384e+06	2.14374e+06	2.07157e+06	1.78289e+06	1.93078e+06	1.68076e+06	2.14724e+06	2.03611e+06	2.11621e+06	1.97054e+06	1.98449e+06	2.06501e+06
Milnacipran	230.174	418.057	Benzenoids	Benzene and substituted derivatives	Phenylacetamides	2.15736e+06	2.26597e+06	2.24252e+06	2.12274e+06	2.78163e+06	2.97738e+06	2.91678e+06	2.5801e+06	2.97742e+06	2.86025e+06	2.81674e+06	2.47135e+06	2.98315e+06	3.01788e+06	3.31639e+06
Mollicellin i	371.167	284.659				6.80359e+06	6.28984e+06	3.99068e+06	5.66723e+06	4.07566e+06	5.0348e+06	5.4534e+06	7.78399e+06	5.32547e+06	1.1443e+07	5.69391e+06	6.30196e+06	6.73326e+06	6.23609e+06	5.76755e+06
Molsidomine	243.133	664.259	Organoheterocyclic compounds	Oxazinanes	Morpholines	1.83017e+06	2.10827e+06	2.01985e+06	1.99079e+06	1.94479e+06	1.85035e+06	2.15634e+06	2.58109e+06	1.77483e+06	1.98742e+06	1.81686e+06	2.09823e+06	1.8599e+06	1.87541e+06	2.04645e+06
Monolinolenin (9c,12c,15c)	335.257	56.4071	Lipids and lipid-like molecules	Fatty Acyls	Lineolic acids and derivatives	9.48062e+06	1.3644e+07	9.73756e+06	9.41747e+06	1.10413e+07	1.11865e+07	7.32782e+06	8.281e+06	8.53476e+06	1.44528e+07	1.17476e+07	1.53744e+07	1.07101e+07	1.17926e+07	1.07402e+07
Monomethyl glutaric acid	101.06	365.149	Lipids and lipid-like molecules	Fatty Acyls	Fatty acid esters	1.29564e+07	1.38442e+07	1.26224e+07	1.25167e+07	1.32305e+07	1.40791e+07	1.38442e+07	1.43937e+07	1.41227e+07	9.53865e+06	1.18452e+07	1.35089e+07	1.46237e+07	1.46519e+07	1.50917e+07
Morphine-3-glucuronide	484.135	277.712				3.42197e+06	3.31201e+06	4.45838e+06	7.18224e+06	8.0379e+06	8.99289e+06	5.25692e+06	7.34113e+06	4.939e+06	6.00679e+06	5.43514e+06	6.72924e+06	3.13216e+06	2.80551e+06	3.12793e+06
Morpholine	88.0759	61.8085	Organoheterocyclic compounds	Oxazinanes	Morpholines	2.67682e+06	2.55558e+06	2.04139e+06	2.19293e+06	2.13994e+06	2.59179e+06	2.58889e+06	2.58374e+06	2.61609e+06	2.15077e+06	2.2191e+06	2.14396e+06	2.3007e+06	2.30054e+06	2.3218e+06
Muricarpone b	348.164	305.235	Phenylpropanoids and polyketides	Diarylheptanoids	Linear diarylheptanoids	8.0702e+06	7.96882e+06	7.82532e+06	6.67385e+06	7.39189e+06	7.62156e+06	2.49475e+07	3.06262e+07	2.46563e+07	1.28294e+07	1.76861e+07	1.84715e+07	1.76779e+07	1.82987e+07	1.85451e+07
Muscimol	115.05	115.412	Organic nitrogen compounds	Organonitrogen compounds	Amines	9.26213e+06	9.69124e+06	9.5181e+06	9.86677e+06	9.4908e+06	9.20171e+06	8.57391e+06	9.94958e+06	8.67736e+06	5.55355e+06	7.6376e+06	8.44741e+06	9.50899e+06	9.54474e+06	9.88778e+06
Myo-inositol	181.07	809.007	Organic oxygen compounds	Organooxygen compounds	Alcohols and polyols	6.03196e+06	6.1979e+06	5.93389e+06	7.29524e+06	9.82422e+06	1.04288e+07	7.72518e+06	1.05084e+07	7.01835e+06	5.80427e+06	8.32319e+06	9.2129e+06	9.77143e+06	1.011e+07	1.02262e+07
Myristamine oxide	258.278	235.851	Organic nitrogen compounds	Organonitrogen compounds	Aminoxides	1.25082e+07	1.34386e+07	1.35203e+07	1.38936e+07	1.23572e+07	1.48004e+07	1.3985e+07	1.40665e+07	1.61607e+07	1.3775e+07	1.09822e+07	1.12455e+07	1.31699e+07	1.33488e+07	1.35004e+07
Myristoyl ethanolamide	272.269	577.516	Organic nitrogen compounds	Organonitrogen compounds	Amines	1.56856e+07	1.75048e+07	1.61905e+07	2.11767e+07	2.19364e+07	2.40358e+07	2.45367e+07	3.08876e+07	2.28737e+07	1.90549e+07	2.60616e+07	3.07305e+07	2.2915e+07	2.29618e+07	2.40462e+07
N2-Acetyl-L-ornithine	175.112	597.235	Organic acids and derivatives	Carboxylic acids and derivatives	"Amino acids, peptides, and analogues"	212270	164525	39094	195048	29822.4	21288.2	41110.6	61986.3	60904.1	65114.3	66473.6	93755.1	63338.8	55606.4	55169.1
N-3-hydroxyoctanoyl-l-homoserine lactone	102.055	102.583	Organic acids and derivatives	Carboxylic acids and derivatives	Amino acids, peptides, and analogues	1.09287e+07	5.88265e+06	1.02814e+07	5.60414e+06	1.25094e+07	6.99812e+06	1.00697e+07	5.62085e+06	5.11097e+06	6.19032e+06	5.18205e+06	6.18393e+06	8.45018e+06	7.2995e+06	8.46982e+06
N-(4-nitro-2-phenoxyphenyl)methanesulfonamide	309.057	696.936	Benzenoids	Benzene and substituted derivatives	Diphenylethers	3.80816e+06	4.02556e+06	3.91766e+06	4.30724e+06	4.25435e+06	4.29969e+06	4.08201e+06	4.45085e+06	4.41406e+06	3.66457e+06	4.28367e+06	4.17533e+06	4.19121e+06	4.21236e+06	4.35559e+06
N6-Methyl-L-lysine	161.128	1049.37	Organic acids and derivatives	Carboxylic acids and derivatives	"Amino acids, peptides, and analogues"	5.77703e+06	1.58449e+07	4.3474e+06	1.47435e+07	2.30524e+06	4.76852e+06	2.82651e+06	858561	5.03629e+06	5.35942e+06	1.76411e+07	1.67924e+07	2.51248e+06	4.16273e+06	4.17517e+06
N-acetyl-.beta.-d-mannosamine	126.055	449.106	Organic oxygen compounds	Organooxygen compounds	Carbohydrates and carbohydrate conjugates	2.26419e+07	2.35542e+07	2.12801e+07	1.98521e+07	1.94884e+07	2.41223e+07	2.41799e+07	2.1468e+07	2.50626e+07	2.31904e+07	2.42462e+07	2.33957e+07	2.355e+07	2.37176e+07	2.57358e+07
N-acetyl-d-glucosamine	244.078	449.621	Organic oxygen compounds	Organooxygen compounds	Carbohydrates and carbohydrate conjugates	1.70353e+08	1.74174e+08	1.78283e+08	1.65714e+08	1.69085e+08	1.62178e+08	1.79603e+08	2.17727e+08	1.95182e+08	1.86531e+08	2.01668e+08	1.9456e+08	1.86506e+08	1.8762e+08	1.87618e+08
N-Acetylglutamine	230.113	683.705	Organic acids and derivatives	Carboxylic acids and derivatives	"Amino acids, peptides, and analogues"	1.95174e+07	2.10627e+07	1.80339e+07	2.20709e+07	1.92416e+07	1.9035e+07	2.00844e+07	2.09165e+07	2.04711e+07	1.99503e+07	1.9438e+07	1.94948e+07	2.05412e+07	2.12942e+07	2.12712e+07
N-acetyl-l-tyrosine	136.075	541.971	Organic acids and derivatives	Carboxylic acids and derivatives	Amino acids, peptides, and analogues	2.18651e+08	2.10403e+08	2.33334e+08	2.42792e+08	2.33789e+08	2.41884e+08	1.6909e+08	2.43069e+08	1.76876e+08	1.28685e+08	2.39907e+08	2.36771e+08	2.21832e+08	2.31677e+08	2.38641e+08
N-acetylneuraminic acid, 2,3-dehydro-2-deoxy-	274.089	768.894	Organic oxygen compounds	Organooxygen compounds	Alcohols and polyols	3.449e+06	3.35813e+06	3.50836e+06	3.36406e+06	3.12944e+06	3.58527e+06	3.40818e+06	3.79549e+06	3.37307e+06	3.73484e+06	3.87508e+06	3.61777e+06	3.22766e+06	3.29523e+06	3.29505e+06
N-acetylputrescine	131.118	569.78	Organic acids and derivatives	Carboximidic acids and derivatives	Carboximidic acids	3.63447e+07	3.80231e+07	3.65443e+07	4.44986e+07	3.29305e+07	3.78866e+07	4.56979e+07	4.39232e+07	4.27468e+07	5.49651e+07	5.30939e+07	5.09585e+07	3.60364e+07	3.67e+07	3.60306e+07
N-acetylsphingosine	306.278	56.6386	Lipids and lipid-like molecules	Sphingolipids	Ceramides	2.88207e+07	3.0549e+07	3.29603e+07	2.76983e+07	2.57433e+07	2.41994e+07	3.50984e+07	3.69803e+07	3.88201e+07	3.91557e+07	4.34223e+07	3.95444e+07	3.44519e+07	3.69762e+07	3.69606e+07
N-alpha-acetyl-l-lysine	189.123	712.492	Organic acids and derivatives	Carboxylic acids and derivatives	Amino acids, peptides, and analogues	1.11638e+07	1.08148e+07	1.02908e+07	1.58191e+07	1.34295e+07	1.54097e+07	1.54095e+07	1.68456e+07	1.53794e+07	1.51778e+07	2.1593e+07	2.03006e+07	1.55774e+07	1.57891e+07	1.5787e+07
N-.alpha.-acetyl-l-ornithine	175.107	651.694	Organic acids and derivatives	Carboxylic acids and derivatives	Amino acids, peptides, and analogues	1.67889e+07	1.65851e+07	1.589e+07	1.55607e+07	1.2834e+07	1.39764e+07	1.89934e+07	1.91637e+07	1.82434e+07	2.29936e+07	2.50317e+07	2.5361e+07	1.87959e+07	1.92313e+07	1.92145e+07
Nandrolone	275.2	57.6056	Lipids and lipid-like molecules	Steroids and steroid derivatives	Estrane steroids	1.83316e+07	1.96943e+07	1.73558e+07	2.59153e+07	2.36941e+07	2.28293e+07	2.48935e+07	2.11222e+07	2.41929e+07	2.35872e+07	2.50263e+07	2.3499e+07	2.37775e+07	2.55679e+07	2.55761e+07
Naproxen	185.107	186.232	Benzenoids	Naphthalenes		6.31928e+06	6.39664e+06	6.16513e+06	4.85515e+06	4.87454e+06	5.03283e+06	7.87524e+06	9.00146e+06	7.36491e+06	4.28528e+06	6.24969e+06	5.92242e+06	6.33788e+06	6.36214e+06	6.58387e+06
Naringenin	147.044	230.161	Phenylpropanoids and polyketides	Flavonoids	Flavans	8.15974e+08	8.81583e+08	8.32145e+08	9.00795e+08	8.98513e+08	8.97333e+08	8.89832e+08	9.12194e+08	9.02717e+08	7.02359e+08	8.70503e+08	8.48248e+08	8.62019e+08	8.83564e+08	8.83877e+08
N-benzyl-d-methionine methyl ester	116.071	61.9787	Organic acids and derivatives	Carboxylic acids and derivatives	Amino acids, peptides, and analogues	3.10288e+06	3.25818e+06	2.82125e+06	3.75238e+06	3.08845e+06	3.46607e+06	3.33862e+06	4.19671e+06	3.44852e+06	2.65734e+06	3.30132e+06	3.39311e+06	3.34678e+06	3.36834e+06	3.55318e+06
N-carboxyethyl-.gamma.-aminobutyric acid	158.081	565.611	Organic acids and derivatives	Carboxylic acids and derivatives	Amino acids, peptides, and analogues	1.09594e+07	1.1253e+07	1.10021e+07	1.12939e+07	1.14133e+07	1.21782e+07	1.12551e+07	1.41315e+07	1.23551e+07	8.98217e+06	1.06881e+07	1.11825e+07	1.10575e+07	1.10655e+07	1.17738e+07
N-dodecylamine	186.221	270.865	Organic nitrogen compounds	Organonitrogen compounds	Amines	2.88568e+06	2.85735e+06	1.72097e+06	3.52146e+06	2.39531e+06	2.32202e+06	8.40585e+06	1.14928e+07	5.97693e+06	5.37154e+06	3.43743e+06	2.46054e+06	4.45062e+06	4.9629e+06	4.96013e+06
Ne-acetyllysine	189.123	633.616	Organic acids and derivatives	Carboxylic acids and derivatives	Amino acids, peptides, and analogues	2.90478e+07	2.93624e+07	2.78867e+07	2.70421e+07	2.69103e+07	2.76976e+07	3.11347e+07	3.28542e+07	3.18409e+07	3.07234e+07	3.6834e+07	3.66033e+07	3.27505e+07	3.29502e+07	3.316e+07
Neopentyl glycol	105.1	282.097	Organic oxygen compounds	Organooxygen compounds	Alcohols and polyols	5.21772e+06	5.01763e+06	5.26175e+06	4.29245e+06	3.32599e+06	3.59365e+06	5.82595e+06	5.52433e+06	5.90067e+06	4.00434e+06	4.20582e+06	4.9827e+06	4.71852e+06	4.81269e+06	4.71926e+06
N.epsilon.-acetyl-l-lysine	211.105	633.612	Organic acids and derivatives	Carboxylic acids and derivatives	Amino acids, peptides, and analogues	3.31255e+07	3.29288e+07	3.25728e+07	3.16619e+07	3.02811e+07	2.98329e+07	3.55847e+07	3.78987e+07	3.51432e+07	3.63824e+07	4.00088e+07	4.00802e+07	3.67665e+07	3.67963e+07	3.84433e+07
N.epsilon.-methyl-l-lysine	161.128	993.239	Organic acids and derivatives	Carboxylic acids and derivatives	Amino acids, peptides, and analogues	6.06483e+06	5.81657e+06	5.74143e+06	5.12943e+06	5.62144e+06	5.20825e+06	5.70687e+06	6.37548e+06	5.9315e+06	7.68378e+06	5.80191e+06	6.52667e+06	5.73414e+06	5.85811e+06	5.85752e+06
Neurodazine	457.145	400.406	Organoheterocyclic compounds	Azoles	Imidazoles	2.92852e+06	2.87201e+06	2.88234e+06	2.21175e+06	1.83198e+06	1.53626e+06	4.59016e+06	5.20259e+06	3.88117e+06	2.80014e+06	4.85192e+06	3.88142e+06	2.65217e+06	2.80939e+06	2.80807e+06
Nevadensin	345.078	653.68	Phenylpropanoids and polyketides	Flavonoids	O-methylated flavonoids	2.9054e+07	2.89872e+07	2.87421e+07	3.06008e+07	2.85496e+07	3.1369e+07	3.21688e+07	3.59827e+07	2.9865e+07	3.93167e+07	4.17446e+07	4.33185e+07	3.02718e+07	3.01844e+07	2.81569e+07
N-Formylmethionine	160.045	282.021	Organic acids and derivatives	Carboxylic acids and derivatives	"Amino acids, peptides, and analogues"	1.00672e+07	1.04167e+07	1.16302e+07	1.67275e+07	8.19873e+06	2.8807e+07	1.11208e+07	1.28421e+07	1.41536e+07	1.98314e+07	6.30368e+06	2.31474e+07	5.35521e+06	4.54964e+06	4.53052e+06
Ng,ng-dimethyl-l-arginine	203.15	890.909	Organic acids and derivatives	Carboxylic acids and derivatives	Amino acids, peptides, and analogues	6.19078e+07	6.99809e+07	6.81293e+07	8.24377e+07	8.713e+07	6.90791e+07	8.45546e+07	5.28501e+07	4.47402e+07	7.27808e+07	1.16058e+08	5.49633e+07	8.92929e+07	8.96159e+07	9.2748e+07
NG,NG-dimethyl-L-arginine(ADMA)	203.15	818.554				350421	394832	573010	737936	989456	1.06202e+06	678474	713741	620934	450764	719775	876170	616636	630164	629929
N-hexanoyl-l-homoserine lactone	200.127	444.601	Organic acids and derivatives	Carboxylic acids and derivatives	Amino acids, peptides, and analogues	6.99263e+06	8.13328e+06	7.14104e+06	7.51462e+06	7.9529e+06	7.83194e+06	1.0923e+07	1.12395e+07	1.18669e+07	1.01782e+07	1.20556e+07	1.2665e+07	1.06358e+07	1.06594e+07	1.14205e+07
Niacinamide	123.055	883.854	Organoheterocyclic compounds	Pyridines and derivatives	Pyridinecarboxylic acids and derivatives	6.22664e+07	6.54017e+07	6.25409e+07	6.81625e+07	6.15663e+07	6.21571e+07	7.08678e+07	1.03538e+08	7.45415e+07	5.60341e+07	6.99109e+07	6.90991e+07	6.61818e+07	6.8857e+07	6.88373e+07
Nicotinamide ribotide	335.063	883.353	Nucleosides, nucleotides, and analogues	Pyridine nucleotides	Nicotinamide nucleotides	7.34453e+07	7.96814e+07	7.68717e+07	8.69625e+07	8.00574e+07	7.88923e+07	1.00448e+08	1.44892e+08	9.63993e+07	6.79286e+07	9.44461e+07	1.02503e+08	9.02583e+07	9.32816e+07	9.32944e+07
Nicotinate	124.039	714.55	Organoheterocyclic compounds	Pyridines and derivatives	Pyridinecarboxylic acids and derivatives	3.88268e+08	3.79085e+08	3.88235e+08	3.78975e+08	3.46832e+08	3.5119e+08	4.22134e+08	5.28874e+08	4.30833e+08	3.37588e+08	4.2563e+08	4.14921e+08	4.14481e+08	4.15112e+08	4.24839e+08
Nigerose	365.104	689.682	Organic oxygen compounds	Organooxygen compounds	Carbohydrates and carbohydrate conjugates	2.72719e+07	2.85987e+07	2.8366e+07	3.09627e+07	2.39556e+07	2.65435e+07	2.76693e+07	3.23575e+07	2.48954e+07	2.92937e+07	2.67565e+07	2.9022e+07	2.66546e+07	2.66577e+07	2.6933e+07
Nivalenol	335.094	625.02	Lipids and lipid-like molecules	Prenol lipids	Sesquiterpenoids	3.76615e+07	5.32123e+07	3.55063e+07	3.39561e+07	2.99065e+07	3.30465e+07	5.10698e+07	4.92709e+07	4.26642e+07	4.12656e+07	4.40338e+07	4.42399e+07	4.03726e+07	4.27445e+07	4.26829e+07
N-methylisoleucine	146.117	431.436	Organic acids and derivatives	Carboxylic acids and derivatives	Amino acids, peptides, and analogues	1.08452e+07	1.04259e+07	1.03091e+07	7.72542e+06	7.93928e+06	7.57714e+06	1.30422e+07	1.42984e+07	1.39899e+07	1.2544e+07	1.53266e+07	1.56414e+07	1.29464e+07	1.29464e+07	1.33421e+07
N-methyl-l-alanine	104.018	458.366	Organic acids and derivatives	Carboxylic acids and derivatives	Amino acids, peptides, and analogues	2.15258e+07	2.38226e+07	2.11369e+07	1.74409e+07	2.32109e+07	2.2786e+07	2.3049e+07	2.61317e+07	2.09865e+07	2.35691e+07	2.28521e+07	2.03877e+07	2.39835e+07	2.39971e+07	2.47104e+07
N-methyl-l-glutamic acid	144.065	650.517	Organic acids and derivatives	Carboxylic acids and derivatives	Amino acids, peptides, and analogues	1.11988e+07	2.8337e+07	1.19711e+07	1.48141e+07	1.23736e+07	3.42052e+07	1.59158e+07	1.82794e+07	1.49179e+07	1.62488e+07	3.6102e+07	3.80434e+07	1.49453e+07	1.54838e+07	1.5456e+07
N-methyltyramine	121.065	384.545	Benzenoids	Benzene and substituted derivatives	Phenethylamines	6.81479e+08	7.24592e+08	6.48654e+08	9.70417e+08	9.12069e+08	1.02883e+09	9.7162e+08	9.69989e+08	1.00968e+09	1.00218e+09	9.98871e+08	1.12485e+09	9.64426e+08	9.76571e+08	9.93327e+08
N,n-diethylcathinone	133.052	117.808	Organic oxygen compounds	Organooxygen compounds	Carbonyl compounds	1.5983e+07	1.70843e+07	1.87447e+07	3.74188e+07	6.99529e+06	1.92613e+07	1.94978e+07	2.5206e+07	1.68807e+07	1.95103e+07	2.99234e+07	2.67745e+07	1.75283e+07	1.87299e+07	1.88239e+07
N,n-dimethylguanosine	312.129	328.146				4.40198e+07	4.64294e+07	4.32051e+07	4.67206e+07	3.66242e+07	4.27175e+07	5.00389e+07	4.8057e+07	4.7593e+07	4.75395e+07	5.24387e+07	4.99902e+07	4.68597e+07	4.88174e+07	4.87475e+07
N,n,n-trimethyllysine	189.159	972.41	Organic acids and derivatives	Carboxylic acids and derivatives	Amino acids, peptides, and analogues	7.41577e+08	7.59591e+08	6.65644e+08	5.71489e+08	7.28799e+08	7.14447e+08	6.82564e+08	6.94587e+08	6.78264e+08	7.19441e+08	7.98405e+08	6.64332e+08	7.41313e+08	7.48375e+08	7.87675e+08
N-octadecylamine	270.314	241.672	Organic nitrogen compounds	Organonitrogen compounds	Amines	3.45735e+06	3.51518e+06	4.05218e+06	1.90704e+06	1.14708e+06	1.66659e+06	3.10618e+06	3.42825e+06	2.95972e+06	4.83365e+06	2.3499e+06	2.10902e+06	1.7526e+06	1.78859e+06	864789
Norcodeine	268.136	327.071				7.75962e+06	9.05717e+06	6.91237e+06	8.11464e+06	6.65192e+06	1.2703e+07	1.6338e+07	2.29034e+07	1.43935e+07	1.01393e+07	1.1659e+07	1.18231e+07	1.19701e+07	1.20388e+07	1.24853e+07
Norvaline	118.065	454.607	Organic acids and derivatives	Carboxylic acids and derivatives	Amino acids, peptides, and analogues	6.12122e+07	6.05233e+07	5.57337e+07	5.08721e+07	5.89909e+07	4.88204e+07	3.86928e+07	5.98903e+07	5.0789e+07	4.56904e+07	5.71928e+07	6.00184e+07	5.59886e+07	6.01663e+07	6.01872e+07
Norvaline, 5-phosphono-	198.073	428.108	Organic acids and derivatives	Carboxylic acids and derivatives	Amino acids, peptides, and analogues	9.09592e+06	1.07051e+07	1.11951e+07	1.02622e+07	4.09159e+06	4.06992e+06	5.31915e+06	5.40924e+06	6.51499e+06	1.32765e+07	9.28237e+06	6.49156e+06	6.63769e+06	5.3084e+06	6.63856e+06
Nostoxanthin	601.421	53.0892	Lipids and lipid-like molecules	Prenol lipids	Tetraterpenoids	1.27227e+07	1.22572e+07	1.20615e+07	1.35172e+07	1.03676e+07	1.17692e+07	1.07232e+07	1.09222e+07	1.10434e+07	1.40294e+07	1.13415e+07	1.08904e+07	1.28812e+07	1.33527e+07	1.33468e+07
Notopterol	187.122	508.167	Lipids and lipid-like molecules	Prenol lipids	Terpene lactones	2.86081e+06	2.77751e+06	2.83343e+06	5.34798e+06	5.4533e+06	5.35456e+06	5.3403e+06	5.44723e+06	5.54597e+06	5.42739e+06	6.38308e+06	6.80609e+06	5.15795e+06	5.18031e+06	5.48448e+06
N-palmitoylglycine	314.279	772.921	Organic acids and derivatives	Carboxylic acids and derivatives	Amino acids, peptides, and analogues	4.10725e+06	7.75962e+06	5.10549e+06	1.07942e+07	5.58537e+06	6.38751e+06	7.62662e+06	7.73267e+06	6.54697e+06	6.08547e+06	1.15328e+07	8.303e+06	8.99245e+06	9.0959e+06	9.98545e+06
N-tridecanoyl-l-homserine lactone	102.055	78.0464	Organic acids and derivatives	Carboxylic acids and derivatives	Amino acids, peptides, and analogues	7.36178e+07	7.60768e+07	7.57907e+07	7.26179e+07	8.15855e+07	8.1398e+07	7.16755e+07	7.04547e+07	7.178e+07	5.76989e+07	6.6171e+07	6.82477e+07	7.11736e+07	7.63921e+07	7.6231e+07
O-acetyl-l-serine	130.065	117.796	Organic acids and derivatives	Carboxylic acids and derivatives	Amino acids, peptides, and analogues	3.12233e+07	2.57905e+07	2.87671e+07	5.19696e+07	1.22673e+07	2.56759e+07	2.79479e+07	3.73884e+07	2.47541e+07	2.88764e+07	4.32989e+07	4.14294e+07	2.50196e+07	2.63376e+07	2.63806e+07
Oleuropein	563.172	423.535	Lipids and lipid-like molecules	Prenol lipids	Terpene glycosides	2.69919e+06	2.70275e+06	2.82143e+06	3.48354e+06	3.07043e+06	4.11838e+06	4.16827e+06	5.20193e+06	4.36565e+06	5.01639e+06	4.74959e+06	5.68119e+06	2.84113e+06	2.84617e+06	2.9866e+06
O-methylsterigmatocystin	361.052	654.247				1.45517e+07	1.53743e+07	1.48615e+07	1.54442e+07	1.3683e+07	1.60959e+07	1.68597e+07	2.14665e+07	1.69097e+07	1.80112e+07	2.37559e+07	2.60945e+07	1.78253e+07	1.84387e+07	1.78154e+07
O-phosphotyrosine	136.075	432.517	Organic acids and derivatives	Carboxylic acids and derivatives	Amino acids, peptides, and analogues	233023	3.33163e+06	1.0039e+07	6.8648e+06	8.04814e+06	6.59942e+06	6.83922e+06	7.77497e+06	257219	1.96457e+07	2.09097e+07	1.68658e+07	8.2395e+06	8.81918e+06	8.8422e+06
Orsellinic acid	169.058	689.712	Benzenoids	Benzene and substituted derivatives	Benzoic acids and derivatives	1.88803e+08	1.76513e+08	1.15408e+08	1.77818e+08	1.25803e+08	1.33567e+08	1.42858e+08	1.47719e+08	2.7633e+07	1.98946e+08	1.13961e+08	8.01469e+07	1.34941e+08	1.07957e+08	1.35603e+08
O-t-butyl-l-serine, methyl ester	120.065	107.11	Organic acids and derivatives	Carboxylic acids and derivatives	Amino acids, peptides, and analogues	3.76843e+06	5.90751e+06	3.92098e+06	3.8364e+06	4.20054e+06	3.74473e+06	2.86471e+06	3.17882e+06	2.53123e+06	2.8607e+06	4.92958e+06	3.66085e+06	3.68657e+06	3.8781e+06	3.87392e+06
Ouabain	607.29	47.8918	Lipids and lipid-like molecules	Steroids and steroid derivatives	Steroid lactones	1.61586e+07	27045.1	1.53754e+07	165124	3.15554e+06	1.8019e+06	1.76074e+07	1.85095e+07	32675.2	56467.9	101135	31505.2	654762	664609	662861
Oxaziclomefone	190.073	94.16	Benzenoids	Benzene and substituted derivatives	Phenylpropanes	1.23729e+07	1.23943e+07	1.32348e+07	1.52201e+07	4.52438e+06	8.44842e+06	2.10731e+07	1.91882e+07	1.7053e+07	1.51659e+07	1.86082e+07	1.75691e+07	1.20473e+07	1.26552e+07	1.26259e+07
Oxymatrine	247.165	649.287	Alkaloids and derivatives	Lupin alkaloids	Matrine alkaloids	1.97887e+06	2.06415e+06	2.02008e+06	2.41276e+06	1.99275e+06	2.28378e+06	2.64144e+06	2.95394e+06	2.55444e+06	2.56829e+06	2.65757e+06	2.93366e+06	2.65128e+06	2.64065e+06	2.69985e+06
Oxyquinoline	146.06	185.813				783128	822242	882356	1.0145e+06	739300	1.01418e+06	867165	581587	971715	529521	814726	986812	1.43827e+06	1.49615e+06	2.05788e+06
Paeonolide	483.162	597.034	Organic oxygen compounds	Organooxygen compounds	Carbohydrates and carbohydrate conjugates	1.14965e+07	9.72743e+06	9.80879e+06	9.56951e+06	8.35006e+06	4.94532e+06	1.43612e+07	1.68562e+07	1.20804e+07	1.17912e+07	1.31063e+07	1.48903e+07	1.21486e+07	1.27765e+07	1.27564e+07
Palmitoleoyl ethanolamide	280.262	140.921	Organic nitrogen compounds	Organonitrogen compounds	Amines	3.1396e+06	3.251e+06	2.58368e+06	7.13024e+06	6.57892e+06	7.22374e+06	3.70003e+06	3.91182e+06	3.33459e+06	3.5473e+06	4.38595e+06	3.28226e+06	4.32069e+06	4.39652e+06	4.32088e+06
Palmitoyl ethanolamide	300.289	55.1925	Organic acids and derivatives	Carboximidic acids and derivatives	Carboximidic acids	403111	1.15359e+06	998335	799507	910169	915140	8.79228e+06	2.356e+06	1.43847e+07	1.01304e+06	4.99412e+07	1.33954e+06	6.64575e+06	6.83088e+06	6.82895e+06
Pamidronic acid	257.992	550.519	Organic acids and derivatives	Organic phosphonic acids and derivatives	Bisphosphonates	1.696e+07	1.51757e+07	1.79908e+07	1.58909e+07	1.45284e+07	1.67738e+07	1.58962e+07	1.37935e+07	1.69686e+07	1.469e+07	1.57222e+07	2.06311e+07	1.57357e+07	1.65163e+07	1.69703e+07
Pantethine	593.215	763.131	Organic acids and derivatives	Carboxylic acids and derivatives	Amino acids, peptides, and analogues	5.52183e+07	6.17744e+07	5.30904e+07	4.85738e+07	4.65187e+07	4.77293e+07	5.57066e+07	6.78664e+07	5.99988e+07	5.6097e+07	5.9075e+07	5.94265e+07	5.98509e+07	5.9889e+07	6.22233e+07
Pantothenic acid	242.099	427.625	Organic acids and derivatives	Carboxylic acids and derivatives	Amino acids, peptides, and analogues	4.52441e+06	4.53609e+06	3.6101e+06	1.04155e+07	5.27562e+06	5.58712e+06	1.98688e+06	2.21187e+06	2.44047e+06	453940	4.90051e+06	3.79566e+06	5.45515e+06	4.52171e+06	5.4232e+06
PC(16:0/16:0)	756.551	58.5305	Lipids and lipid-like molecules	Glycerophospholipids	Glycerophosphocholines	6.30767e+07	7.21259e+07	5.9795e+07	5.8259e+07	5.63872e+07	5.79199e+07	5.82869e+07	6.57397e+07	5.52709e+07	6.02355e+07	6.58032e+07	5.90656e+07	6.0976e+07	6.10896e+07	6.24833e+07
P-coumaric acid	165.054	230.103	Phenylpropanoids and polyketides	Cinnamic acids and derivatives	Hydroxycinnamic acids and derivatives	3.38117e+08	3.45091e+08	3.29917e+08	3.50122e+08	3.81192e+08	3.55325e+08	3.34447e+08	3.79128e+08	3.64476e+08	2.82113e+08	3.46107e+08	3.38871e+08	3.63831e+08	3.76886e+08	3.76857e+08
Peimine	432.346	772.022	Lipids and lipid-like molecules	Steroids and steroid derivatives	Steroidal alkaloids	2.5206e+07	2.49677e+07	2.66748e+07	3.27239e+07	2.63153e+07	3.19674e+07	3.49931e+07	3.55155e+07	3.47043e+07	3.41698e+07	4.06384e+07	4.37093e+07	3.32213e+07	3.36158e+07	3.42436e+07
Pendimethalin	282.15	242.184	Benzenoids	Benzene and substituted derivatives	Aniline and substituted anilines	1.03337e+07	6.32345e+06	7.499e+06	3.81756e+06	6.89932e+06	1.20178e+07	2.77847e+07	3.18908e+07	1.82999e+07	1.49108e+07	2.11031e+07	2.32248e+07	1.41286e+07	1.41121e+07	1.55199e+07
Penicillic acid	125.071	113.861	Organic acids and derivatives	Keto acids and derivatives	Medium-chain keto acids and derivatives	6.35177e+06	6.64641e+06	6.50855e+06	6.07392e+06	6.94667e+06	6.94438e+06	6.65508e+06	6.85605e+06	6.40878e+06	5.73906e+06	6.20205e+06	6.92021e+06	7.93363e+06	7.45631e+06	7.93627e+06
Pentaethylene glycol	239.148	103.448	Organic oxygen compounds	Organooxygen compounds	Ethers	3.34601e+06	3.32518e+06	3.41666e+06	3.85693e+06	3.31817e+06	3.03454e+06	3.14584e+06	4.04035e+06	2.79575e+06	4.24342e+06	4.27758e+06	4.35959e+06	3.69602e+06	3.70182e+06	3.76954e+06
(-)-perillyl alcohol	107.086	198.579	Lipids and lipid-like molecules	Prenol lipids	Monoterpenoids	1.76984e+07	2.41375e+07	1.80707e+07	1.6016e+07	1.68319e+07	1.65888e+07	2.05721e+07	3.10252e+07	2.9039e+07	2.10401e+07	2.19883e+07	2.19363e+07	1.94455e+07	1.94571e+07	2.03212e+07
Perillyl alcohol	135.117	425.206				2.24979e+06	1.04687e+06	1.33181e+06	1.90889e+06	1.20049e+06	1.24019e+06	1.51753e+06	1.77861e+06	2.70577e+06	1.99561e+06	3.41184e+06	3.18581e+06	2.29409e+06	2.7667e+06	2.27994e+06
Perindopril	369.249	1015.49	Organic acids and derivatives	Carboxylic acids and derivatives	Amino acids, peptides, and analogues	1.22291e+07	1.45837e+07	1.37914e+07	1.51104e+07	1.31471e+07	1.7096e+07	1.5932e+07	1.86427e+07	1.63652e+07	1.41512e+07	1.53416e+07	1.58216e+07	1.49022e+07	1.49872e+07	1.59658e+07
Perphenazine	404.151	650.088	Organoheterocyclic compounds	Benzothiazines	Phenothiazines	9.53247e+06	9.43716e+06	9.68545e+06	7.84118e+06	5.31629e+06	3.69547e+06	1.35598e+07	1.53883e+07	1.23558e+07	1.44594e+07	1.36219e+07	1.3924e+07	7.88717e+06	7.45544e+06	7.45737e+06
Phe-Ala	237.123	355.601	Organic acids and derivatives	Carboxylic acids and derivatives	Amino acids, peptides, and analogues	4.3686e+06	4.6013e+06	3.7753e+06	3.99061e+06	2.98954e+06	3.2364e+06	4.30464e+06	4.43733e+06	4.49621e+06	3.54861e+06	4.15397e+06	4.68934e+06	4.60073e+06	4.63731e+06	4.79051e+06
Phenanthridine	180.087	328.071	Organoheterocyclic compounds	Quinolines and derivatives	Benzoquinolines	4.21052e+07	5.10491e+07	4.10654e+07	4.39345e+07	3.27956e+07	3.86614e+07	4.2716e+07	4.71746e+07	4.50157e+07	4.66107e+07	4.75795e+07	4.94899e+07	4.28893e+07	4.67861e+07	4.67189e+07
Pheniramine	241.154	647.884	Organoheterocyclic compounds	Pyridines and derivatives	Pheniramines	7.19352e+06	2.93131e+06	3.3121e+06	3.53727e+06	8.0899e+06	1.13848e+07	1.02397e+07	1.24265e+07	1.12373e+07	9.25129e+06	4.88874e+06	1.09267e+07	9.62708e+06	9.93924e+06	9.93499e+06
Phenol	95.0494	541.971	Benzenoids	Phenols	1-hydroxy-4-unsubstituted benzenoids	5.37325e+06	5.38243e+06	5.7733e+06	6.12179e+06	5.82513e+06	6.37373e+06	4.1379e+06	6.23203e+06	4.2325e+06	2.86655e+06	6.18118e+06	6.23858e+06	5.52477e+06	5.63536e+06	6.00858e+06
Phenylacetaldehyde	103.054	454.555	Benzenoids	Benzene and substituted derivatives	Phenylacetaldehydes	3.34597e+08	3.39572e+08	3.31191e+08	3.51776e+08	3.39292e+08	3.52941e+08	2.60793e+08	3.34452e+08	2.83472e+08	2.69555e+08	3.39947e+08	3.70056e+08	3.27524e+08	3.30332e+08	3.46129e+08
Phenylalanine	166.086	454.555	Organic acids and derivatives	Carboxylic acids and derivatives	Amino acids, peptides, and analogues	2.22775e+09	2.30106e+09	2.3845e+09	2.141e+09	2.32672e+09	2.2646e+09	1.57264e+09	1.80519e+09	1.63441e+09	1.66686e+09	2.19008e+09	2.08629e+09	2.23172e+09	2.28333e+09	2.28792e+09
Phenylethylamine	105.07	282.086	Benzenoids	Benzene and substituted derivatives	Phenethylamines	5.81148e+08	6.00007e+08	5.62832e+08	4.50467e+08	4.1098e+08	4.02309e+08	6.59607e+08	7.08457e+08	6.84259e+08	4.57707e+08	5.40474e+08	5.56911e+08	5.57473e+08	5.54726e+08	5.54716e+08
Phenylglyoxylic acid	195.002	820.126	Benzenoids	Benzene and substituted derivatives	Benzoyl derivatives	3.07737e+06	3.24699e+06	3.13742e+06	3.23256e+06	2.90793e+06	3.17828e+06	2.67919e+06	3.06486e+06	2.70605e+06	3.05703e+06	3.30767e+06	3.40545e+06	3.09012e+06	3.09232e+06	3.14715e+06
Phenylpropiolic acid	147.028	868.797	Benzenoids	Benzene and substituted derivatives		2.3611e+08	2.4636e+08	2.01512e+08	2.13268e+08	2.03967e+08	2.4337e+08	1.9685e+08	1.94499e+08	2.28173e+08	1.44777e+08	2.25111e+08	1.73419e+08	2.45028e+08	2.53636e+08	2.47428e+08
Pheophytin a	871.57	46.3557				8.13044e+07	9.88119e+07	7.45803e+07	1.68578e+08	6.9803e+07	7.24279e+07	5.67984e+07	6.38958e+07	5.91938e+07	1.14454e+08	1.37705e+08	8.69524e+07	6.32142e+07	6.47216e+07	4.97547e+07
Phe-phe	313.153	270.956	Organic acids and derivatives	Carboxylic acids and derivatives	Amino acids, peptides, and analogues	1.27083e+07	1.02257e+07	9.50278e+06	8.8529e+06	8.59876e+06	8.44162e+06	8.70181e+06	1.23833e+07	9.44728e+06	9.41514e+06	8.06485e+06	1.05788e+07	9.00399e+06	9.01204e+06	9.23802e+06
Phe-thr	267.133	363.348	Organic acids and derivatives	Carboxylic acids and derivatives	Amino acids, peptides, and analogues	2.39585e+06	2.72111e+06	2.42653e+06	2.63069e+06	2.27167e+06	2.22463e+06	2.30753e+06	2.22195e+06	2.14575e+06	2.46149e+06	2.23108e+06	2.24961e+06	2.78049e+06	2.82641e+06	3.11308e+06
Phosphocholine	184.073	244.834	Organic nitrogen compounds	Organonitrogen compounds	Quaternary ammonium salts	1.5774e+07	1.68907e+07	1.44833e+07	1.41851e+07	9.88099e+06	1.24734e+07	1.60999e+07	1.87205e+07	1.52033e+07	1.30474e+07	1.57063e+07	1.34661e+07	1.30182e+07	1.32765e+07	1.32778e+07
Phosphorylcholine	184.073	929.977	Organic nitrogen compounds	Organonitrogen compounds	Quaternary ammonium salts	3.65661e+08	2.5915e+08	3.17406e+08	5.44436e+08	1.64285e+08	2.04905e+08	4.55665e+08	5.1107e+08	3.68388e+08	3.01022e+08	2.96799e+08	1.39973e+08	2.44098e+08	2.36831e+08	2.75885e+08
Phytosphingosine	318.299	237.995	Organic nitrogen compounds	Organonitrogen compounds	Amines	3.31747e+08	3.31452e+08	3.04299e+08	3.26337e+08	2.02057e+08	2.59147e+08	4.49205e+08	4.89224e+08	4.48138e+08	3.19766e+08	3.2635e+08	3.19979e+08	3.2045e+08	3.25091e+08	3.24962e+08
Picroside i	475.141	524.691	Phenylpropanoids and polyketides	Cinnamic acids and derivatives	Cinnamic acid esters	1.99798e+06	2.3826e+06	2.02196e+06	1.17727e+06	971400	868747	6.50197e+06	8.84716e+06	7.28095e+06	2.96096e+06	3.70393e+06	3.53773e+06	3.71876e+06	3.74708e+06	3.74685e+06
Picroside ii	495.159	362.703	Phenylpropanoids and polyketides	Tannins	Hydrolyzable tannins	3.31692e+06	3.09755e+06	3.24838e+06	3.427e+06	3.1786e+06	3.40607e+06	3.38537e+06	3.1865e+06	3.32534e+06	3.3344e+06	5.02279e+06	5.90269e+06	3.07212e+06	3.34845e+06	3.327e+06
Picrotin	293.083	723.903				7.90771e+06	8.08807e+06	8.2913e+06	8.79618e+06	5.89719e+06	6.68048e+06	8.30635e+06	8.95834e+06	8.12542e+06	9.71177e+06	8.06797e+06	7.52074e+06	6.91784e+06	7.04953e+06	6.91813e+06
Pidotimod	245.076	870.788	Organic acids and derivatives	Carboxylic acids and derivatives	Amino acids, peptides, and analogues	3.02649e+06	3.06826e+06	2.78938e+06	2.76518e+06	2.77291e+06	2.5153e+06	2.91223e+06	3.19156e+06	2.99949e+06	2.68262e+06	2.92534e+06	3.37442e+06	2.84905e+06	2.84927e+06	2.90731e+06
Pimelic acid	143.081	295.519	Lipids and lipid-like molecules	Fatty Acyls	Fatty acids and conjugates	4.06238e+06	3.97385e+06	4.12391e+06	3.73041e+06	3.51007e+06	4.21907e+06	4.96619e+06	6.35081e+06	5.01352e+06	3.99881e+06	5.35808e+06	5.27521e+06	4.97395e+06	5.10917e+06	5.10598e+06
(+)-pinoresinol	341.137	314.914				7.01694e+06	7.46978e+06	7.17985e+06	8.07051e+06	7.88925e+06	7.59407e+06	9.04829e+06	1.16558e+07	8.92212e+06	7.1386e+06	9.28177e+06	1.11863e+07	9.12004e+06	9.22563e+06	9.226e+06
Pipamperone	376.258	51.3565	Organic oxygen compounds	Organooxygen compounds	Carbonyl compounds	9.1519e+07	1.06042e+08	1.12145e+08	9.31774e+07	1.18809e+08	1.37972e+08	9.40424e+07	1.166e+08	1.05164e+08	1.07028e+08	9.23098e+07	1.17355e+08	1.65883e+08	1.71266e+08	1.71054e+08
Piperonyl sulfoxide	347.167	194.289				2.65271e+06	2.5342e+06	2.48628e+06	3.01367e+06	3.45855e+06	3.23812e+06	8.00112e+06	1.03861e+07	9.17066e+06	1.828e+07	1.97619e+07	1.98831e+07	8.34349e+06	8.47288e+06	8.47392e+06
Pirimicarb-desamido	168.138	260.705	Organic nitrogen compounds	Organonitrogen compounds	Amines	567986	989229	489835	394928	277075	410168	1.02698e+07	1.60078e+07	1.16987e+07	887103	2.38379e+06	1.68994e+06	2.62083e+06	2.12358e+06	2.58799e+06
Plumbagine	189.065	138.49	Benzenoids	Naphthalenes	Naphthoquinones	1.97616e+07	2.00017e+07	2.08665e+07	1.88753e+07	5.38814e+06	1.66543e+07	1.74377e+07	1.85308e+07	9.8232e+06	2.4436e+07	1.00193e+07	2.45223e+07	2.07807e+07	2.17699e+07	2.17344e+07
Polygodial	133.101	424.015				4.94644e+06	5.40934e+06	5.24417e+06	3.07509e+06	2.68977e+06	3.26051e+06	8.17458e+06	9.70022e+06	8.7587e+06	8.03927e+06	8.20419e+06	7.84069e+06	7.38237e+06	7.64395e+06	7.87707e+06
Porphobilinogen	210.079	335.578	Organic nitrogen compounds	Organonitrogen compounds	Amines	73463.3	109307	131634	473174	525396	403034	1.79826e+08	1.9547e+08	1.73971e+08	762511	1.12796e+06	1.02273e+06	4.82051e+07	4.89673e+07	5.00549e+07
Pramoxine	294.214	82.9052				3.34373e+06	3.67043e+06	3.24966e+06	3.6363e+06	2.51894e+06	2.35231e+06	5.14857e+06	4.01274e+06	4.5366e+06	3.81493e+06	3.26107e+06	3.5099e+06	3.41564e+06	3.52588e+06	3.41437e+06
Pro-Asp	231.097	792.453	Organic acids and derivatives	Carboxylic acids and derivatives	Amino acids, peptides, and analogues	1.03811e+06	1.16491e+06	1.00397e+06	1.07001e+06	1.09827e+06	1.28701e+06	1.42755e+06	1.46353e+06	1.40497e+06	1.11522e+06	1.44679e+06	1.411e+06	1.31198e+06	1.31972e+06	1.40356e+06
Pro-Glu	245.113	780.476	Organic acids and derivatives	Carboxylic acids and derivatives	Amino acids, peptides, and analogues	3.66836e+06	3.99141e+06	3.53007e+06	4.24762e+06	3.52214e+06	4.19908e+06	5.09878e+06	5.68793e+06	4.86884e+06	4.3729e+06	4.86395e+06	4.5352e+06	4.53339e+06	4.66326e+06	4.70851e+06
Pro-leu	229.154	538.075	Organic acids and derivatives	Carboxylic acids and derivatives	Amino acids, peptides, and analogues	1.36131e+07	1.3551e+07	1.32906e+07	1.40846e+07	1.40392e+07	1.4732e+07	1.72956e+07	2.20095e+07	1.75095e+07	1.59714e+07	1.81909e+07	1.85056e+07	1.7485e+07	1.76633e+07	1.77516e+07
Prolintane	218.211	125.074				2.07962e+07	2.14796e+07	1.57539e+07	1.64176e+07	2.19944e+07	1.5383e+07	2.32009e+07	1.7535e+07	1.31093e+07	1.36986e+07	1.55815e+07	1.31982e+07	1.53176e+07	1.5725e+07	1.57194e+07
Propamocarb	189.159	248.606	Organic acids and derivatives	Carboxylic acids and derivatives	Amino acids, peptides, and analogues	5.16678e+08	5.56108e+08	4.84268e+08	5.00259e+08	4.48108e+08	5.225e+08	6.05368e+08	6.01387e+08	6.21287e+08	5.51873e+08	5.78371e+08	5.78092e+08	5.9149e+08	6.14361e+08	6.12686e+08
Prophos	215.016	868.62				1.15853e+09	1.38565e+09	9.1169e+08	1.43677e+09	9.63692e+08	1.00178e+09	1.06151e+09	9.73612e+08	1.26005e+09	9.96656e+08	1.30459e+09	9.49002e+08	9.20533e+08	5.87798e+08	9.27438e+08
Propiconazole	344.09	687.682	Benzenoids	Benzene and substituted derivatives	Halobenzenes	4.65457e+06	4.94584e+06	4.06433e+06	4.34717e+06	3.30696e+06	4.17444e+06	4.70762e+06	6.16694e+06	4.98906e+06	3.8508e+06	5.04397e+06	4.73263e+06	4.67422e+06	4.70254e+06	5.10556e+06
Propofol .beta.-d-glucuronide	319.15	628.252	Organic oxygen compounds	Organooxygen compounds	Carbohydrates and carbohydrate conjugates	5.85525e+06	6.25965e+06	5.6158e+06	7.77463e+06	7.53689e+06	7.41168e+06	7.28162e+06	7.55708e+06	7.04923e+06	7.33412e+06	8.63636e+06	8.86038e+06	7.23627e+06	7.37666e+06	7.37538e+06
Propranolol	260.171	749.713				3.20566e+06	3.41254e+06	3.35126e+06	3.85001e+06	4.0543e+06	4.13095e+06	3.72113e+06	3.84887e+06	3.89712e+06	2.51554e+06	3.85406e+06	4.3583e+06	3.75412e+06	3.87345e+06	3.88734e+06
Prostaglandin i2	353.229	263.728	Lipids and lipid-like molecules	Fatty Acyls	Eicosanoids	3.40648e+06	3.77234e+06	3.93116e+06	6.22869e+06	9.84317e+06	6.56748e+06	7.2717e+06	5.94291e+06	4.0888e+06	6.40263e+06	4.08174e+06	7.91024e+06	4.92632e+06	4.62362e+06	4.60228e+06
Pro-Thr	217.129	676.94	Organic acids and derivatives	Carboxylic acids and derivatives	Amino acids, peptides, and analogues	3.0118e+07	3.03484e+07	2.91842e+07	3.93194e+07	3.68658e+07	3.9261e+07	2.65414e+07	3.55809e+07	2.43718e+07	3.64762e+07	3.9138e+07	3.66003e+07	3.8132e+07	4.02836e+07	4.01289e+07
Protoporphyrin ix	563.244	341.613				3.03336e+06	3.36993e+06	3.9386e+06	4.70394e+06	1.10368e+07	3.99039e+06	1.99734e+06	2.78994e+06	2.43498e+06	8.33796e+06	4.53146e+06	1.12897e+07	3.03456e+06	3.00716e+06	3.17877e+06
Pro-Trp	302.304	97.2646	Organic nitrogen compounds	Organonitrogen compounds	Amines	6.18104e+07	7.3732e+07	9.22646e+07	8.22858e+07	7.38267e+07	7.16181e+07	7.55212e+07	7.27169e+07	8.51784e+07	7.50426e+07	5.75464e+07	5.30225e+07	6.06936e+07	5.83997e+07	5.91475e+07
Prunasin	295.101	371.112	Organic oxygen compounds	Organooxygen compounds	Carbohydrates and carbohydrate conjugates	1.75723e+06	1.95294e+06	1.5589e+06	1.97125e+06	1.64411e+06	2.05271e+06	2.41424e+06	2.46847e+06	2.58407e+06	2.36733e+06	2.10788e+06	2.5203e+06	2.23474e+06	2.29204e+06	2.35509e+06
Prunetin	285.096	150.237	Phenylpropanoids and polyketides	Isoflavonoids	O-methylated isoflavonoids	1.01419e+07	9.76225e+06	1.01782e+07	6.69239e+06	6.43642e+06	6.63869e+06	1.03607e+07	1.17147e+07	9.5045e+06	9.52833e+06	6.68154e+06	7.87805e+06	9.24979e+06	9.46623e+06	9.46647e+06
Psoralidin	337.109	679.862	Phenylpropanoids and polyketides	Isoflavonoids	Coumestans	1.4237e+07	1.52665e+07	1.47393e+07	1.50507e+07	1.33499e+07	1.27561e+07	1.31231e+07	1.69344e+07	1.52997e+07	1.85142e+07	1.56344e+07	1.28658e+07	1.26573e+07	1.24108e+07	1.24109e+07
Pterostilbene	257.112	272.52	Phenylpropanoids and polyketides	Stilbenes		2.51633e+07	2.60977e+07	2.4758e+07	3.16788e+07	3.27114e+07	2.95167e+07	2.29123e+07	3.0348e+07	2.30974e+07	1.92364e+07	2.87633e+07	3.10886e+07	3.16185e+07	3.16845e+07	3.25118e+07
Putrescine	89.1076	1144.77	Organic nitrogen compounds	Organonitrogen compounds	Amines	7.02868e+06	7.11632e+06	2.04113e+06	7.77914e+06	4.70078e+06	1.2335e+07	5.24478e+06	4.90292e+06	2.4124e+06	8.03707e+06	3.25907e+06	9.2643e+06	805761	803117	957075
Pyrazine-2-carboxylic acid	125.023	808.303	Organoheterocyclic compounds	Diazines	Pyrazines	311401	393336	382545	449218	2.83015e+06	3.12832e+06	626413	691844	492538	592143	694829	823836	1.5913e+06	1.68386e+06	1.67852e+06
Pyridalyl	204.086	449.62	Benzenoids	Benzene and substituted derivatives	Halobenzenes	7.7873e+07	7.42e+07	6.87896e+07	6.96855e+07	7.19154e+07	7.80206e+07	9.94013e+07	1.10657e+08	1.05068e+08	8.32718e+07	9.6973e+07	9.58769e+07	9.54961e+07	9.57067e+07	9.72038e+07
Pyridine	80.0499	678.436				6.79782e+06	7.37572e+06	6.05829e+06	6.65883e+06	8.08017e+06	5.70288e+06	6.80147e+06	8.62447e+06	7.16232e+06	5.91332e+06	8.09007e+06	6.30482e+06	6.77847e+06	6.6933e+06	6.6946e+06
Pyridoxal	168.065	406.824	Organoheterocyclic compounds	Pyridines and derivatives	Pyridine carboxaldehydes	2.30526e+07	2.479e+07	2.41368e+07	2.50334e+07	2.50044e+07	3.01342e+07	3.16157e+07	3.59303e+07	2.97913e+07	3.24354e+07	3.5194e+07	3.78162e+07	2.98576e+07	3.03398e+07	3.03488e+07
Pyridoxal (Vitamin B6)	150.055	239.326	Organoheterocyclic compounds	Pyridines and derivatives	Pyridine carboxaldehydes	405746	1.82495e+06	6.22108e+06	7.86162e+06	4.93395e+06	1.01692e+06	1.24387e+06	1.48429e+06	181891	6.18496e+06	711712	1.53949e+06	5.98745e+06	2.69224e+06	3.92263e+06
Pyridoxamine 5-phosphate	271.068	912.03	Organoheterocyclic compounds	Pyridines and derivatives	Pyridoxamines	1.03963e+06	954861	1.04598e+06	3.21733e+06	3.55192e+06	4.15933e+06	934612	1.58617e+06	1.14365e+06	1.7748e+06	2.24635e+06	2.03703e+06	2.02659e+06	2.14781e+06	2.18436e+06
Pyridoxine	170.096	204.462	Organoheterocyclic compounds	Pyridines and derivatives	Pyridoxines	1.1079e+08	1.12466e+08	1.01565e+08	1.1388e+08	1.13625e+08	1.16317e+08	1.14637e+08	1.17777e+08	1.14644e+08	9.07272e+07	1.12707e+08	1.10761e+08	1.14335e+08	1.14754e+08	1.18958e+08
Pyridoxine + o-hex	332.133	501.034	Organoheterocyclic compounds	Pyridines and derivatives	Pyridoxines	2.65525e+06	2.5438e+06	2.4813e+06	2.39135e+06	2.60725e+06	2.97583e+06	5.01705e+06	5.86895e+06	4.76328e+06	4.51305e+06	4.53472e+06	5.07525e+06	3.9706e+06	4.1354e+06	4.13434e+06
Pyroglu-Ala	201.086	757.48	Organic acids and derivatives	Carboxylic acids and derivatives	Amino acids, peptides, and analogues	9.05904e+06	9.73474e+06	9.37246e+06	8.0018e+06	7.55269e+06	7.67294e+06	1.21846e+07	1.30471e+07	1.16875e+07	9.41699e+06	1.04205e+07	1.06332e+07	1.02798e+07	1.0303e+07	1.09181e+07
Pyrrol	68.05	678.363				2.20648e+07	2.25652e+07	2.08827e+07	2.31309e+07	2.35401e+07	2.32247e+07	2.27941e+07	2.19686e+07	2.33077e+07	1.91644e+07	2.41442e+07	2.30983e+07	2.27534e+07	2.27785e+07	2.31792e+07
Pyrrole-2-carboxylic acid	112.017	420.778	Organoheterocyclic compounds	Pyrroles	Pyrrole carboxylic acids and derivatives	7.49169e+06	8.12702e+06	6.30783e+06	6.21666e+06	7.10436e+06	7.87732e+06	7.97211e+06	7.67e+06	8.75818e+06	6.84423e+06	8.87188e+06	7.33427e+06	7.82127e+06	7.87296e+06	8.42836e+06
Pyrrolidine	72.0813	1145.62	Organoheterocyclic compounds	Pyrrolidines		1.16002e+08	4.00175e+07	7.94269e+07	1.17467e+08	7.57203e+07	1.7464e+08	7.56817e+07	8.62886e+07	2.89807e+07	6.40139e+07	5.53433e+07	1.39383e+08	5.48068e+06	2.31895e+06	5.42971e+06
(-)-quebrachitol	141.065	242.152	Organic oxygen compounds	Organooxygen compounds	Alcohols and polyols	8.93122e+06	7.73439e+06	7.95693e+06	9.5397e+06	5.0418e+06	8.16648e+06	9.24163e+06	9.24778e+06	1.18792e+07	1.32877e+07	9.90159e+06	1.13588e+07	8.48594e+06	1.01386e+07	8.65452e+06
Quercetin	303.049	538.074	Phenylpropanoids and polyketides	Flavonoids	Flavones	2.72603e+07	2.32131e+07	2.3411e+07	1.15396e+07	2.27397e+07	1.20277e+07	3.39759e+07	4.13067e+07	4.19339e+07	1.7397e+07	4.10848e+07	4.08132e+07	3.88954e+07	3.90226e+07	4.13514e+07
Quinaldic acid	174.039	197.555	Organoheterocyclic compounds	Quinolines and derivatives	Quinoline carboxylic acids	1.99342e+08	1.69369e+08	1.62737e+08	1.84492e+08	1.67373e+08	1.85806e+08	2.07729e+08	1.85127e+08	1.71195e+08	1.25398e+08	1.89891e+08	2.02228e+08	1.9774e+08	1.909e+08	1.90944e+08
Quinolin-2-ol	146.06	117.557	Organoheterocyclic compounds	Quinolines and derivatives	Quinolones and derivatives	7.24212e+07	6.74829e+07	7.33512e+07	1.38853e+08	2.69117e+07	6.74932e+07	7.62798e+07	9.69071e+07	6.55847e+07	7.25416e+07	1.08802e+08	9.92498e+07	6.5989e+07	6.88417e+07	7.00601e+07
Quinone	109.028	862.122	Organic oxygen compounds	Organooxygen compounds	Carbonyl compounds	2.08661e+07	2.04845e+07	1.88524e+07	1.88257e+07	2.10531e+07	2.00107e+07	2.55773e+07	2.91729e+07	2.60801e+07	2.23505e+07	3.04115e+07	3.30578e+07	2.51262e+07	2.62159e+07	2.62032e+07
Rac-4-(methylamino)-1-(3-pyridyl)-1-butanol	181.122	52.6457	Organic nitrogen compounds	Organonitrogen compounds	Amines	3.34212e+07	3.36461e+07	3.08555e+07	3.36092e+07	3.069e+07	3.05019e+07	2.84062e+07	2.81302e+07	3.19254e+07	2.85674e+07	3.22594e+07	2.80025e+07	3.18063e+07	3.18223e+07	3.22523e+07
Rac-n'-nitrosonornicotine 1-n-oxide	387.161	285.231	Organoheterocyclic compounds	Pyridines and derivatives	Pyrrolidinylpyridines	9.39406e+06	6.72237e+06	6.92319e+06	4.03517e+06	3.60529e+06	5.78315e+06	5.18061e+06	7.76319e+06	4.77234e+06	7.87214e+06	8.08467e+06	5.19082e+06	5.56359e+06	5.40369e+06	5.70259e+06
Resveratrol dimer	455.13	372.699				1.61454e+07	1.4881e+07	1.57466e+07	1.63431e+07	1.50523e+07	2.05679e+07	1.53674e+07	1.73692e+07	1.42454e+07	1.8981e+07	1.80886e+07	2.44012e+07	1.09355e+07	1.14818e+07	1.1474e+07
Riboflavin	377.141	642.503	Organoheterocyclic compounds	Pteridines and derivatives	Alloxazines and isoalloxazines	1.14172e+06	1.11487e+06	1.10881e+06	176919	235319	223997	9.56728e+06	1.07742e+07	9.26547e+06	5.87035e+06	6.57352e+06	7.04265e+06	2.87853e+06	2.72685e+06	2.73138e+06
Ricinine	165.065	181.445	Organoheterocyclic compounds	Pyridines and derivatives	3-pyridinecarbonitriles	5.648e+06	5.86522e+06	6.53024e+06	8.57967e+06	3.38591e+06	5.62438e+06	8.67248e+06	7.58013e+06	6.22596e+06	6.30933e+06	1.00523e+07	9.12441e+06	6.16211e+06	6.46105e+06	6.44567e+06
Roridin a	555.239	434.823	Lipids and lipid-like molecules	Prenol lipids	Sesquiterpenoids	1.23087e+07	1.24727e+07	1.53216e+07	1.69145e+07	1.55472e+07	1.53016e+07	3.42254e+07	2.77029e+07	2.0473e+07	3.85047e+07	2.87212e+07	2.9941e+07	2.03029e+07	2.02911e+07	1.73906e+07
Rutinose	344.131	700.197	Lipids and lipid-like molecules	Fatty Acyls	Fatty acyl glycosides	3.02155e+07	3.00785e+07	3.06351e+07	3.88828e+07	3.31572e+07	3.60361e+07	2.10986e+07	2.52428e+07	2.01633e+07	1.97601e+07	2.01721e+07	2.1071e+07	2.56827e+07	2.56875e+07	2.61179e+07
S-(2-boronoethyl)-l-cysteine	176.055	731.827	Organic acids and derivatives	Carboxylic acids and derivatives	Amino acids, peptides, and analogues	1.11794e+06	1.10983e+06	1.16638e+06	1.23778e+06	991270	1.20369e+06	1.97047e+06	4.46935e+07	1.76201e+06	1.42088e+06	1.5723e+06	1.5956e+06	1.48247e+06	1.51567e+06	1.51639e+06
S-adenosylmethionine	399.143	982.62	Nucleosides, nucleotides, and analogues	5'-deoxyribonucleosides	5'-deoxy-5'-thionucleosides	1.68797e+07	1.66525e+07	1.57557e+07	1.70548e+07	2.76633e+07	2.90928e+07	1.47493e+07	1.78538e+07	3.1644e+07	1.72509e+07	1.54396e+07	1.82608e+07	1.76135e+07	2.2233e+07	2.11711e+07
S(-)-cathinone	132.08	427.089	Organic oxygen compounds	Organooxygen compounds	Carbonyl compounds	3.19586e+06	3.20245e+06	3.52193e+06	2.36867e+06	5.70293e+06	6.22013e+06	5.91667e+06	5.36996e+06	6.03053e+06	1.93622e+06	4.8895e+06	6.40994e+06	4.94165e+06	5.27576e+06	5.57691e+06
Scopoletin	133.031	649.387	Phenylpropanoids and polyketides	Coumarins and derivatives	Hydroxycoumarins	3.93022e+06	3.87971e+06	3.81562e+06	2.89633e+06	2.32671e+06	2.30762e+06	4.76415e+06	4.77939e+06	4.55909e+06	4.17451e+06	4.01025e+06	4.08601e+06	3.79013e+06	3.89205e+06	3.89054e+06
Secbumeton	226.158	99.7401	Organoheterocyclic compounds	Triazines	1,3,5-triazines	4.28953e+06	4.49465e+06	3.35799e+06	2.93029e+06	1.97646e+06	3.68703e+06	8.60886e+06	8.25739e+06	7.68946e+06	2.94343e+06	3.05247e+06	3.65773e+06	4.1188e+06	4.11771e+06	4.30555e+06
Seneciphyllin	334.164	320.582				5.39056e+06	5.31094e+06	5.22664e+06	4.76987e+06	4.02747e+06	3.75957e+06	5.44397e+06	6.35177e+06	5.25049e+06	4.87784e+06	6.47281e+06	5.98516e+06	4.97709e+06	5.07674e+06	5.08042e+06
Serotonin	160.075	426.926	Organoheterocyclic compounds	Indoles and derivatives	Tryptamines and derivatives	1.32308e+09	1.23978e+09	1.08297e+09	8.23889e+08	2.42856e+09	2.43808e+09	2.35807e+09	2.18236e+09	2.49276e+09	7.16214e+08	1.93142e+09	2.43483e+09	2.23506e+09	2.29269e+09	2.44635e+09
Sesamol	109.028	809.007				2.13783e+06	1.75511e+06	1.76053e+06	1.90065e+06	3.31004e+06	3.23597e+06	2.2956e+06	2.89833e+06	2.13165e+06	1.59285e+06	2.36921e+06	2.48271e+06	2.96347e+06	3.10938e+06	3.10261e+06
Sinapyl alcohol	193.085	255.554	Benzenoids	Phenols	Methoxyphenols	9.80212e+06	1.08356e+07	9.2414e+06	9.47851e+06	1.04851e+07	1.0312e+07	2.03283e+07	2.42059e+07	2.05772e+07	9.20114e+06	1.13032e+07	1.16402e+07	1.37673e+07	1.37763e+07	1.44957e+07
S-methyl-5'-thioadenosine	298.096	154.995	Nucleosides, nucleotides, and analogues	5'-deoxyribonucleosides	5'-deoxy-5'-thionucleosides	5.33693e+08	4.91848e+08	5.04409e+08	4.76995e+08	6.80419e+08	6.7354e+08	5.02586e+08	7.06223e+08	5.15442e+08	4.41139e+08	5.15651e+08	5.38165e+08	5.27655e+08	5.39244e+08	5.19705e+08
S-methyl-l-cysteine	119.016	530.415	Organic acids and derivatives	Carboxylic acids and derivatives	Amino acids, peptides, and analogues	2.8059e+07	2.75946e+07	2.62265e+07	1.73933e+07	1.82549e+07	1.56772e+07	3.23767e+07	3.8999e+07	3.33116e+07	2.34489e+07	3.00003e+07	2.99839e+07	2.91558e+07	2.918e+07	3.00835e+07
Sn-glycerol-3-phosphoethanolamine	238.044	724.452	Lipids and lipid-like molecules	Glycerophospholipids	Glycerophosphoethanolamines	2.66206e+06	2.64777e+06	2.73554e+06	2.68865e+06	1.8894e+06	2.1933e+06	2.07588e+06	2.26797e+06	1.92326e+06	1.74827e+06	1.89089e+06	1.88906e+06	2.15812e+06	2.23077e+06	2.23048e+06
Solasodine	414.335	672.286	Lipids and lipid-like molecules	Steroids and steroid derivatives	Steroidal alkaloids	3.76177e+06	4.43939e+06	4.51861e+06	5.03346e+06	4.64024e+06	5.1785e+06	5.67926e+06	7.25208e+06	5.82562e+06	6.61345e+06	7.54847e+06	8.36745e+06	5.69978e+06	5.78076e+06	5.76452e+06
Spectinomycin	189.134	931.711	Organoheterocyclic compounds	Dioxanes	1,4-dioxanes	1.95535e+08	1.99986e+08	1.93388e+08	1.71521e+08	4.87648e+07	2.05579e+08	1.94621e+08	2.19131e+08	1.97339e+08	1.52245e+08	1.96584e+08	2.09995e+08	1.93661e+08	1.94168e+08	2.10391e+08
Sphinganine	302.304	227.519	Organic nitrogen compounds	Organonitrogen compounds	Amines	4.0129e+06	1.15721e+06	1.4969e+06	1.3557e+06	1.18778e+06	1.18715e+06	1.37858e+06	1.30123e+06	1.43013e+06	918589	734436	793510	1.22348e+06	1.27582e+06	1.22452e+06
Spinosine	609.189	764.36	Phenylpropanoids and polyketides	Flavonoids	Flavonoid glycosides	1.16116e+07	1.21473e+07	1.11811e+07	1.01542e+07	8.66756e+06	1.18158e+07	1.07311e+07	1.60485e+07	1.08396e+07	8.80948e+06	1.19312e+07	1.18157e+07	1.26986e+07	1.30729e+07	1.30656e+07
Spiroxamine	298.284	512.718	Organic oxygen compounds	Organooxygen compounds	Ethers	2.83178e+07	3.13245e+07	2.80219e+07	2.83793e+07	2.94931e+07	3.23563e+07	4.12564e+07	2.86129e+07	2.72835e+07	2.60365e+07	3.7521e+07	3.49334e+07	3.37986e+07	3.38798e+07	3.45198e+07
Stachydrine	102.047	454.56	Organic acids and derivatives	Carboxylic acids and derivatives	Amino acids, peptides, and analogues	1.27854e+07	1.32632e+07	1.42163e+07	1.41075e+07	1.36889e+07	1.37576e+07	1.12201e+07	1.33446e+07	1.09215e+07	1.20914e+07	1.39549e+07	1.39782e+07	1.26008e+07	1.32785e+07	1.32799e+07
Stearidonic acid	277.215	58.0658	Lipids and lipid-like molecules	Fatty Acyls	Lineolic acids and derivatives	4.38531e+07	4.0881e+07	3.72891e+07	3.22793e+07	3.52378e+07	3.46526e+07	6.13656e+07	5.1696e+07	6.90583e+07	4.12584e+07	4.94195e+07	5.13524e+07	5.18357e+07	5.25933e+07	5.34851e+07
Stearoylcarnitine	428.351	606.991	Lipids and lipid-like molecules	Fatty Acyls	Fatty acid esters	1.28496e+06	1.32953e+06	1.40589e+06	1.94648e+06	1.60214e+06	1.73663e+06	1.68915e+06	1.64044e+06	1.66801e+06	1.70398e+06	1.56339e+06	1.94126e+06	1.6115e+06	1.64715e+06	1.69073e+06
Succinamide	100.039	202.19	Lipids and lipid-like molecules	Fatty Acyls	Fatty amides	9.98495e+06	6.71424e+06	1.47332e+07	8.27706e+06	9.80204e+06	4.12515e+06	1.49968e+07	1.49308e+07	7.22856e+06	8.51555e+06	5.38696e+06	5.39243e+06	1.22152e+07	1.02285e+07	9.99759e+06
Succinic acid-2,2,3,3-d4	123.047	134.364	Organic acids and derivatives	Carboxylic acids and derivatives	Dicarboxylic acids and derivatives	1.58161e+08	1.78784e+08	1.73395e+08	1.36874e+08	8.85716e+07	9.43252e+07	1.3545e+08	1.26223e+08	1.20298e+08	1.97856e+08	1.54182e+08	1.69848e+08	1.49514e+08	1.43245e+08	1.43438e+08
Succinic acid n,n-dimethylhydrazide	143.073	340.391	Lipids and lipid-like molecules	Fatty Acyls	Fatty acids and conjugates	3.15969e+07	3.36875e+07	3.28819e+07	3.20242e+07	3.0041e+07	2.99918e+07	3.12918e+07	3.5934e+07	3.43973e+07	2.76989e+07	3.29296e+07	3.40531e+07	3.15734e+07	3.23916e+07	3.24859e+07
Succinic semialdehyde	85.0287	249.021				7.60929e+06	6.34048e+06	6.41843e+06	7.57975e+06	7.73706e+06	7.5457e+06	9.00258e+06	7.84081e+06	4.15373e+06	1.93366e+07	9.17043e+06	2.08672e+07	1.30426e+07	1.14982e+07	1.15804e+07
Sulfallate	116.053	49.8266	Organic acids and derivatives	Dithiocarbamic acids and derivatives	Dithiocarbamic acid esters	1.98112e+07	1.50338e+07	1.97493e+07	1.53458e+07	1.47704e+07	1.70939e+07	3.73631e+07	3.15299e+07	2.42978e+07	2.36382e+07	2.59089e+07	2.46128e+07	3.76115e+07	3.76121e+07	3.82135e+07
Sulfamethazine	279.11	546.153	Benzenoids	Benzene and substituted derivatives	Benzenesulfonamides	3.21259e+06	3.73168e+06	3.6093e+06	3.78979e+06	3.83346e+06	3.90092e+06	4.46191e+06	5.44069e+06	4.19613e+06	4.07228e+06	4.7495e+06	5.02135e+06	4.16024e+06	4.16248e+06	4.33543e+06
Sulfasalazine	381.078	663.929	Organoheterocyclic compounds	Azobenzenes		5.85248e+07	5.98972e+07	6.23861e+07	6.48917e+07	6.42762e+07	6.46205e+07	7.02401e+07	6.53841e+07	4.89419e+07	5.10059e+07	5.74338e+07	7.0577e+07	6.97934e+07	6.98099e+07	7.34785e+07
Sulindac	379.099	384.012	Benzenoids	Indenes and isoindenes		2.27707e+06	2.21313e+06	2.20988e+06	2.05639e+06	2.51598e+06	2.09516e+06	1.73253e+06	2.058e+06	1.68448e+06	1.97991e+06	2.42003e+06	1.85911e+06	2.07791e+06	2.18202e+06	2.97232e+06
Swainsonine	174.102	389.79				2.50026e+06	2.59168e+06	2.60924e+06	2.51943e+06	2.51839e+06	2.62457e+06	2.90777e+06	3.23576e+06	2.78277e+06	2.9923e+06	3.29716e+06	3.51788e+06	3.10666e+06	3.15356e+06	3.15411e+06
Swertisin	393.114	371.848	Phenylpropanoids and polyketides	Flavonoids	Flavonoid glycosides	5.90319e+06	6.29191e+06	6.46189e+06	4.671e+06	3.44008e+06	2.82678e+06	5.94958e+06	6.99214e+06	5.67569e+06	4.11041e+06	5.47345e+06	5.42189e+06	5.01409e+06	5.01179e+06	4.8832e+06
Temazepam	323.073	634.635	Organoheterocyclic compounds	Benzodiazepines	1,4-benzodiazepines	1.64354e+07	2.23087e+07	1.64868e+07	1.90414e+07	2.20187e+07	2.3142e+07	2.45165e+07	2.13714e+07	2.09512e+07	1.69854e+07	2.24862e+07	2.11295e+07	2.1913e+07	2.20122e+07	2.3911e+07
Teniposide	383.131	518.484	Lignans, neolignans and related compounds	Lignan lactones	Podophyllotoxins	6.27128e+06	6.42412e+06	6.21455e+06	2.6372e+06	2.5197e+06	1.99445e+06	9.4401e+06	1.23036e+07	9.9652e+06	6.42221e+06	8.66221e+06	7.51347e+06	5.46493e+06	5.4674e+06	5.63587e+06
Terbutryne	242.153	183.87	Organoheterocyclic compounds	Triazines	1,3,5-triazines	1.15807e+07	1.26029e+07	1.02717e+07	8.17035e+06	7.74106e+06	1.08562e+07	3.50388e+07	3.32875e+07	2.98713e+07	1.32893e+07	1.47832e+07	1.86931e+07	1.71665e+07	1.78695e+07	1.78392e+07
Tetracycline	445.161	382.496				1.00708e+06	1.1253e+06	851536	1.2373e+06	1.30096e+06	1.46217e+06	1.38274e+06	1.04712e+06	1.19696e+06	566533	1.32844e+06	1.24682e+06	1.50187e+06	1.76432e+06	1.74047e+06
Tetrahydrofolate	468.161	277.432	Organic acids and derivatives	Carboxylic acids and derivatives	Amino acids, peptides, and analogues	1.24442e+07	1.21661e+07	1.42907e+07	2.1641e+07	2.17752e+07	2.03316e+07	1.79321e+07	3.05756e+07	2.1453e+07	2.06687e+07	2.49865e+07	2.41749e+07	2.27656e+07	1.83902e+07	2.2724e+07
Theophylline	181.052	278.333	Organoheterocyclic compounds	Imidazopyrimidines	Purines and purine derivatives	5.5995e+06	5.76741e+06	9.55976e+06	9.99437e+06	643271	5.2457e+06	6.78536e+06	6.88984e+06	6.15154e+06	9.25274e+06	6.54838e+06	1.18254e+07	6.00671e+06	5.71934e+06	5.71936e+06
Thiamine	265.111	603.522	Organoheterocyclic compounds	Diazines	Pyrimidines and pyrimidine derivatives	7.84334e+07	8.02195e+07	8.13844e+07	8.13767e+07	6.94343e+07	7.53482e+07	7.45948e+07	7.58357e+07	7.1796e+07	5.97076e+07	7.62408e+07	7.56961e+07	7.43067e+07	7.45144e+07	7.84411e+07
Thiamine monophosphate	122.071	603.522	Organoheterocyclic compounds	Diazines	Pyrimidines and pyrimidine derivatives	5.30209e+07	5.46398e+07	5.28317e+07	5.55333e+07	5.01628e+07	5.06503e+07	5.05402e+07	5.24758e+07	5.04968e+07	3.9428e+07	5.1688e+07	5.46995e+07	5.12828e+07	5.14086e+07	5.31368e+07
Thiobencarb	258.061	332.989	Benzenoids	Benzene and substituted derivatives	Halobenzenes	1.77305e+06	1.91217e+06	1.71304e+06	3.47606e+06	2.86758e+06	3.45506e+06	3.44402e+06	4.82577e+06	3.73706e+06	3.48816e+06	5.98146e+06	5.52365e+06	2.98977e+06	3.12808e+06	3.12399e+06
Thioetheramide-PC	780.55	243.855				3.40084e+07	3.63871e+07	3.4324e+07	3.3301e+07	3.32296e+07	3.4158e+07	3.1136e+07	3.40396e+07	2.94831e+07	3.22597e+07	3.50124e+07	3.02532e+07	3.33604e+07	3.33909e+07	3.4046e+07
Thiopropionic acid, s-ethyl ester	119.052	832.828	Organic acids and derivatives	Thiocarboxylic acids and derivatives	Thioesters	1.70165e+07	1.61492e+07	1.8985e+07	1.69718e+07	1.8583e+07	2.49142e+07	1.91173e+07	1.75802e+07	1.29139e+07	1.04747e+07	1.82759e+07	2.35153e+07	1.75348e+07	1.7633e+07	1.89145e+07
Thr-Phe	267.133	399.775	Organic acids and derivatives	Carboxylic acids and derivatives	Amino acids, peptides, and analogues	1.59986e+06	1.97407e+06	1.99974e+06	1.53205e+06	1.35547e+06	1.39079e+06	1.80295e+06	1.76677e+06	1.9194e+06	1.83153e+06	1.75924e+06	1.62821e+06	1.80824e+06	1.89089e+06	1.89914e+06
Tiagabine	278.123	783.035	Organoheterocyclic compounds	Piperidines	Piperidinecarboxylic acids and derivatives	3.88102e+06	4.32958e+06	3.70034e+06	3.53512e+06	3.31913e+06	4.22213e+06	4.67339e+06	5.85616e+06	4.47275e+06	4.40624e+06	4.31955e+06	4.37157e+06	4.61089e+06	4.63205e+06	4.81264e+06
Tomatidin	416.351	520.445	Lipids and lipid-like molecules	Steroids and steroid derivatives	Steroidal alkaloids	4.85468e+07	4.97008e+07	4.91939e+07	1.55998e+08	1.48874e+08	1.67047e+08	2.05799e+07	2.43442e+07	1.95506e+07	5.44654e+07	6.60968e+07	7.18836e+07	9.20768e+07	9.60661e+07	9.58193e+07
Topiramate	362.084	386.764	Organoheterocyclic compounds	Dioxolopyrans		7.55721e+06	7.40113e+06	7.57225e+06	6.91123e+06	7.54847e+06	7.20261e+06	1.0532e+07	1.2247e+07	9.47486e+06	1.09227e+07	1.10757e+07	1.33193e+07	7.21917e+06	7.72182e+06	7.67146e+06
Trachelanthine	302.217	434.833				3.29623e+06	3.08363e+06	3.44674e+06	2.23072e+06	4.02608e+06	2.81735e+06	2.07705e+06	2.35248e+06	2.86288e+06	1.50087e+06	2.09864e+06	1.94554e+06	2.92624e+06	2.94892e+06	2.99217e+06
Tramadol	246.18	995.279	Benzenoids	Phenol ethers	Anisoles	8.77625e+07	8.93126e+07	9.16033e+07	8.7834e+07	5.77706e+07	6.71234e+07	9.50407e+07	1.13217e+08	8.90374e+07	9.70104e+07	8.71578e+07	8.74883e+07	8.62361e+07	8.97903e+07	8.95959e+07
Trans-2-phenylcyclopropylamine	117.07	340.391	Organic nitrogen compounds	Organonitrogen compounds	Amines	1.9475e+07	1.98826e+07	1.9407e+07	1.74383e+07	1.77038e+07	1.75512e+07	1.93993e+07	2.06712e+07	2.04206e+07	1.61123e+07	2.00289e+07	1.90774e+07	1.85754e+07	1.87649e+07	1.90689e+07
Trans-3'-hydroxycotinine	134.06	239.662	Organoheterocyclic compounds	Pyridines and derivatives	Pyrrolidinylpyridines	3.05484e+06	3.03481e+06	5.17903e+06	4.70995e+06	4.25774e+06	3.09454e+06	2.94141e+06	8.33481e+06	3.37744e+06	4.18945e+06	4.31091e+06	6.29272e+06	5.39541e+06	5.34111e+06	4.52504e+06
Trans-aconitic acid	175.023	868.6	Organic acids and derivatives	Carboxylic acids and derivatives	Tricarboxylic acids and derivatives	2.01546e+08	1.95948e+08	1.89967e+08	1.90147e+08	1.72398e+08	2.22807e+08	2.02779e+08	1.92301e+08	2.03982e+08	1.25793e+08	1.99565e+08	1.74835e+08	1.95499e+08	1.95653e+08	2.11305e+08
Trans-cinnamic acid	149.059	454.555	Phenylpropanoids and polyketides	Cinnamic acids and derivatives	Cinnamic acids	6.18519e+07	6.18128e+07	6.07949e+07	5.77851e+07	6.30405e+07	5.97412e+07	4.15848e+07	4.85536e+07	4.41369e+07	4.16373e+07	5.56444e+07	5.63389e+07	5.94134e+07	6.08548e+07	6.08675e+07
Trans-zeatin	202.097	407.98	Organoheterocyclic compounds	Imidazopyrimidines	Purines and purine derivatives	3.63423e+06	3.8334e+06	3.99508e+06	3.23345e+06	3.49397e+06	4.05295e+06	5.74222e+06	6.19692e+06	5.7694e+06	4.29548e+06	4.8582e+06	5.16354e+06	4.55608e+06	4.72102e+06	4.72068e+06
Trehalose	360.149	733.917	Organic oxygen compounds	Organooxygen compounds	Carbohydrates and carbohydrate conjugates	1.38141e+07	1.21462e+07	1.37329e+07	1.18195e+07	1.27351e+07	1.21024e+07	1.4565e+07	1.83942e+07	1.41041e+07	1.41403e+07	1.51216e+07	1.88217e+07	1.7184e+07	1.79888e+07	1.79662e+07
Triamcinolone diacetate	479.187	367.411	Lipids and lipid-like molecules	Steroids and steroid derivatives	Pregnane steroids	5.68468e+06	5.65934e+06	6.07121e+06	6.899e+06	3.23712e+06	1.10558e+07	1.08301e+07	1.1942e+07	9.83998e+06	1.00034e+07	1.4044e+07	1.06763e+07	7.95879e+06	7.66747e+06	8.00234e+06
Triethanolamine	150.112	235.945	Organic nitrogen compounds	Organonitrogen compounds	Amines	1.92103e+07	2.05617e+07	1.79945e+07	1.85983e+07	1.5352e+07	1.9561e+07	7.03545e+07	6.55915e+07	6.26675e+07	2.20994e+07	2.85474e+07	3.1539e+07	3.40905e+07	3.41727e+07	3.55734e+07
Triethylene glycol monobutyl ether	207.158	56.4623	Organic oxygen compounds	Organooxygen compounds	Ethers	1.46003e+06	1.35482e+06	1.35927e+06	2.6975e+06	4.38936e+06	3.35555e+06	1.60689e+06	1.42459e+06	1.48943e+06	1.39277e+06	1.45274e+06	1.35458e+06	1.53708e+06	1.53705e+06	1.56368e+06
Triflumuron	156.042	481.29	Benzenoids	Benzene and substituted derivatives	N-phenylureas	2.58554e+06	2.56313e+06	2.72641e+06	3.26568e+06	2.71104e+06	3.10446e+06	3.59013e+06	4.00055e+06	3.76032e+06	3.62778e+06	3.59533e+06	4.31657e+06	2.06556e+06	2.03741e+06	2.03753e+06
Trigonelline	138.055	508.163	Alkaloids and derivatives			3.12286e+09	3.28053e+09	3.31025e+09	4.15211e+09	4.04926e+09	4.13613e+09	4.12042e+09	3.86669e+09	4.06445e+09	4.01334e+09	4.07772e+09	3.98491e+09	3.89435e+09	3.90764e+09	4.18861e+09
Trimethylamine	60.0814	458.387	Organic nitrogen compounds	Organonitrogen compounds	Amines	5.31104e+07	4.77368e+07	5.39349e+07	5.73921e+07	5.72108e+07	6.10903e+07	5.76081e+07	6.057e+07	5.52877e+07	6.00227e+07	5.67621e+07	5.19805e+07	5.44872e+07	5.69843e+07	5.46571e+07
Trinexapac-ethyl	275.109	319.036				3.23309e+07	3.21634e+07	3.46635e+07	4.83429e+07	4.55811e+07	6.67729e+07	5.28786e+07	6.64912e+07	5.2621e+07	9.01446e+07	8.05856e+07	9.84591e+07	5.01309e+07	4.87417e+07	5.01624e+07
Trioxsalen	457.168	408.15	Phenylpropanoids and polyketides	Coumarins and derivatives	Furanocoumarins	775907	624324	730883	482367	516743	394004	1.18397e+06	1.13431e+06	1.33758e+06	834602	1.22202e+06	1.2992e+06	1.10077e+06	1.18087e+06	1.17924e+06
Tris(hydroxymethyl)aminomethane	122.081	429.377	Organic nitrogen compounds	Organonitrogen compounds	Amines	1.13244e+07	1.15446e+07	9.2248e+06	1.21806e+07	9.69239e+06	9.33157e+06	7.22465e+06	7.68694e+06	8.47395e+06	1.22539e+07	1.04063e+07	8.68941e+06	9.54823e+06	8.47689e+06	8.46138e+06
Trp-Ile	318.18	316.298	Organic acids and derivatives	Carboxylic acids and derivatives	Amino acids, peptides, and analogues	1.66271e+07	1.6082e+07	1.62601e+07	1.73893e+07	1.45023e+07	1.34274e+07	1.66221e+07	1.71956e+07	1.70325e+07	1.43931e+07	1.63543e+07	1.7311e+07	1.65981e+07	1.66372e+07	1.71723e+07
Tryptamine	161.107	374.791				9.23342e+06	7.47899e+06	7.66612e+06	1.31225e+06	1.1373e+07	801003	1.24663e+07	1.50519e+07	1.32082e+07	9.69727e+06	8.22509e+06	1.37621e+07	7.76577e+06	7.85158e+06	4.0081e+06
Tyramine	138.091	384.545	Benzenoids	Benzene and substituted derivatives	Phenethylamines	8.25628e+07	8.49402e+07	7.72112e+07	1.10635e+08	1.02469e+08	1.20334e+08	1.15722e+08	1.17832e+08	1.19118e+08	1.18759e+08	1.22659e+08	1.36847e+08	1.14755e+08	1.17744e+08	1.17702e+08
Tyr-Glu-Arg	234.134	158.125	Organic acids and derivatives	Carboxylic acids and derivatives	Amino acids, peptides, and analogues	7.8518e+06	1.24104e+07	9.25568e+06	8.19171e+06	5.36693e+06	1.1474e+07	1.27731e+07	1.40167e+07	2.31929e+07	8.70852e+06	7.53467e+06	7.92736e+06	7.30562e+06	8.23541e+06	8.21609e+06
Tyr-Phe	329.149	328.624	Organic acids and derivatives	Carboxylic acids and derivatives	Amino acids, peptides, and analogues	4.55075e+06	4.80469e+06	4.35105e+06	4.56533e+06	4.75032e+06	4.22696e+06	4.27375e+06	4.74473e+06	4.70111e+06	4.17868e+06	4.08999e+06	4.95899e+06	4.17299e+06	4.25278e+06	4.33876e+06
Uracil	113.035	271.011	Organoheterocyclic compounds	Diazines	Pyrimidines and pyrimidine derivatives	1.93053e+08	2.05787e+08	2.09111e+08	2.33593e+08	2.23582e+08	2.16179e+08	2.37677e+08	2.65275e+08	2.31917e+08	2.31516e+08	2.30431e+08	2.31619e+08	2.2398e+08	2.31582e+08	2.31279e+08
Uridine 5'-diphosphate	405.008	846.14	Nucleosides, nucleotides, and analogues	Pyrimidine nucleotides	Pyrimidine ribonucleotides	1.71183e+07	1.90987e+07	1.55219e+07	2.97651e+07	2.27555e+07	3.44438e+07	2.59505e+07	2.38476e+07	2.47794e+07	1.51873e+07	2.81581e+07	2.21303e+07	2.60722e+07	2.63756e+07	2.87211e+07
Uridine 5'-diphosphate (UDP)	405.009	916.696	"Nucleosides, nucleotides, and analogues"	Pyrimidine nucleotides	Pyrimidine ribonucleotides	46704.6	51711.2	79195.6	175634	762470	677168	135493	290401	142492	21448.6	138955	226564	281492	295958	294823
Val-Arg	274.2	442.105	Organic acids and derivatives	Carboxylic acids and derivatives	Amino acids, peptides, and analogues	6.64271e+06	6.83177e+06	5.90199e+06	5.5204e+06	5.4296e+06	6.67869e+06	5.95556e+06	5.97738e+06	6.63818e+06	5.42985e+06	6.58989e+06	6.01332e+06	6.26602e+06	6.43311e+06	6.42996e+06
Val-Gln-Lys	374.239	759.638	Organic acids and derivatives	Carboxylic acids and derivatives	Amino acids, peptides, and analogues	1.87742e+06	2.06155e+06	1.51431e+06	2.07515e+06	3.40217e+06	2.30716e+06	1.59278e+06	2.29407e+06	1.45243e+06	1.09728e+06	1.54741e+06	569541	2.0748e+06	2.11601e+06	3.31677e+06
Val-Glu	247.128	705.255	Organic acids and derivatives	Carboxylic acids and derivatives	Amino acids, peptides, and analogues	9.00203e+06	9.61453e+06	9.21902e+06	8.74317e+06	8.4218e+06	7.81663e+06	7.88631e+06	8.41795e+06	8.15197e+06	6.25398e+06	7.70525e+06	9.24509e+06	8.28302e+06	8.51633e+06	8.50981e+06
Val-Ile	231.17	337.873	Organic acids and derivatives	Carboxylic acids and derivatives	Amino acids, peptides, and analogues	3.84958e+07	3.96916e+07	3.91384e+07	3.56107e+07	3.4263e+07	3.74286e+07	3.86464e+07	3.41974e+07	3.72594e+07	3.08042e+07	4.03483e+07	3.56642e+07	3.89041e+07	3.92337e+07	4.70989e+07
Val-Lys	246.18	688.73	Organic acids and derivatives	Carboxylic acids and derivatives	Amino acids, peptides, and analogues	1.00118e+07	9.97354e+06	1.01174e+07	9.58236e+06	8.98269e+06	8.65037e+06	9.36472e+06	9.77145e+06	9.35549e+06	6.02912e+06	7.7627e+06	9.64105e+06	9.05508e+06	9.08489e+06	9.69538e+06
Val-met	249.126	345.641	Organic acids and derivatives	Carboxylic acids and derivatives	Amino acids, peptides, and analogues	6.56726e+06	7.3371e+06	7.86301e+06	5.42572e+06	6.51117e+06	5.1894e+06	6.11863e+06	6.73099e+06	6.57923e+06	6.00918e+06	5.69243e+06	6.45119e+06	6.39129e+06	6.39126e+06	6.42343e+06
Val-Phe	265.154	317.429	Organic acids and derivatives	Carboxylic acids and derivatives	Amino acids, peptides, and analogues	3.29974e+07	3.48801e+07	3.60974e+07	3.36508e+07	2.9929e+07	2.56332e+07	3.37514e+07	3.21762e+07	3.49616e+07	2.86169e+07	3.20619e+07	3.28692e+07	3.26579e+07	3.27092e+07	3.41021e+07
Val-Tyr	281.149	377.095	Organic acids and derivatives	Carboxylic acids and derivatives	Amino acids, peptides, and analogues	3.0324e+06	2.84137e+06	3.01493e+06	2.6213e+06	2.37154e+06	2.49403e+06	2.89984e+06	2.56956e+06	2.85021e+06	1.90885e+06	2.89367e+06	2.7078e+06	2.65615e+06	2.95682e+06	2.95557e+06
Val-Val	217.154	363.109	Organic acids and derivatives	Carboxylic acids and derivatives	Amino acids, peptides, and analogues	6.16617e+06	5.84321e+06	5.89501e+06	4.8561e+06	5.9441e+06	4.47958e+06	4.73076e+06	5.39327e+06	3.84125e+06	3.82735e+06	5.87477e+06	6.76654e+06	6.29707e+06	6.41599e+06	6.98293e+06
Vasicine	189.127	421.003	Organoheterocyclic compounds	Diazanaphthalenes	Benzodiazines	2.0208e+07	2.1215e+07	1.86048e+07	2.28559e+07	2.25879e+07	2.56012e+07	2.64787e+07	2.48291e+07	2.72991e+07	1.17724e+07	2.60814e+07	2.58752e+07	2.45833e+07	2.59101e+07	2.58328e+07
Vasicinone	185.07	408.068	Organoheterocyclic compounds	Diazanaphthalenes	Benzodiazines	2.41121e+06	2.57041e+06	2.67551e+06	2.22773e+06	2.55449e+06	2.82041e+06	4.14905e+06	4.38258e+06	4.00307e+06	3.20383e+06	3.75561e+06	4.04042e+06	3.01909e+06	3.11443e+06	3.11591e+06
Vesamicol	260.221	486.016	Organoheterocyclic compounds	Piperidines	Phenylpiperidines	2.34693e+06	2.06686e+06	1.99043e+06	2.41621e+06	2.301e+06	2.32511e+06	2.35395e+06	2.41608e+06	2.14403e+06	2.2429e+06	2.49078e+06	2.36476e+06	2.33673e+06	2.44308e+06	2.43832e+06
Wortmannin	429.172	286.069	Lipids and lipid-like molecules	Steroids and steroid derivatives	Oxasteroids and derivatives	2.12624e+06	2.03806e+06	2.0018e+06	1.61337e+06	1.78808e+06	1.62077e+06	4.419e+06	6.70051e+06	5.03015e+06	3.28861e+06	5.61992e+06	5.09777e+06	3.9575e+06	3.73582e+06	3.94861e+06
Xanthosine 5'-monophosphate	365.062	600.383	Nucleosides, nucleotides, and analogues	Purine nucleotides	Purine ribonucleotides	3.47483e+07	3.21566e+07	3.19143e+07	2.6249e+07	1.32481e+07	1.60919e+07	3.61526e+07	4.09824e+07	3.15583e+07	2.94561e+07	3.37093e+07	3.68286e+07	2.39225e+07	2.32149e+07	2.32099e+07
Zerumbone	119.073	454.571	Lipids and lipid-like molecules	Prenol lipids	Sesquiterpenoids	1.23329e+07	1.21873e+07	1.09591e+07	1.15091e+07	1.01995e+07	9.98974e+06	7.12858e+06	1.06627e+07	8.48611e+06	8.51129e+06	1.14975e+07	1.04755e+07	1.04197e+07	1.095e+07	1.09438e+07
Zidovudine	290.085	285.973	Nucleosides, nucleotides, and analogues	Pyrimidine nucleosides	Pyrimidine 2',3'-dideoxyribonucleosides	2.3814e+06	3.46718e+06	3.02704e+06	3.67714e+06	3.50281e+06	3.41267e+06	6.36732e+06	8.63854e+06	5.25473e+06	3.65846e+06	3.67261e+06	3.10072e+06	3.47261e+06	3.4709e+06	3.40577e+06
Zolpidem	235.118	233.4	Organoheterocyclic compounds	Azoles	Imidazoles	1.44339e+07	1.49948e+07	1.36041e+07	1.77956e+07	1.62421e+07	1.36542e+07	2.90085e+07	3.38248e+07	2.96814e+07	1.90399e+07	1.50683e+07	1.64521e+07	1.96307e+07	1.96324e+07	2.04391e+07
Zonisamide	132.044	216.981				2.1641e+07	2.28701e+07	2.27589e+07	2.36655e+07	2.01392e+07	2.51116e+07	2.30313e+07	2.37075e+07	2.32354e+07	2.17374e+07	2.2863e+07	2.19213e+07	2.18195e+07	2.30601e+07	2.29569e+07
(10e,15z)-9,12,13-trihydroxyoctadeca-10,15-dienoic acid	327.219	251.495	Lipids and lipid-like molecules	Fatty Acyls	Lineolic acids and derivatives	2.78799e+07	3.46629e+07	2.99041e+07	6.69296e+07	5.38977e+07	5.09968e+07	4.43629e+07	3.41086e+07	3.99377e+07	9.58751e+07	8.21852e+07	1.04591e+08	5.73389e+07	5.94178e+07	5.92631e+07
11beta-hydroxyprogesterone	329.234	264.099	Lipids and lipid-like molecules	Steroids and steroid derivatives	Pregnane steroids	5.79198e+07	5.23578e+07	4.94006e+07	7.18849e+07	5.69621e+07	5.63106e+07	2.6425e+08	5.49996e+07	7.56964e+07	1.04625e+08	6.06026e+07	7.99266e+07	7.18185e+07	9.12475e+07	7.2296e+07
11-dehydrothromboxane b3	365.183	572.799	Lipids and lipid-like molecules	Fatty Acyls	Fatty acids and conjugates	1.48927e+07	1.50249e+07	1.42469e+07	1.47626e+07	9.19185e+06	8.7762e+06	1.37498e+07	1.46401e+07	1.34169e+07	1.33292e+07	1.65677e+07	1.87193e+07	1.39582e+07	1.39454e+07	1.31775e+07
12(13)-epoxy-9z-octadecenoic acid	295.229	57.1173	Lipids and lipid-like molecules	Fatty Acyls	Fatty acids and conjugates	3.07346e+07	3.23781e+07	3.1051e+07	3.78666e+07	3.81693e+07	3.83072e+07	4.23429e+07	2.11959e+07	3.84497e+07	2.92943e+07	2.26751e+07	2.50308e+07	3.44778e+07	3.40126e+07	3.4167e+07
1,2,3-benzenetriol	125.024	866.056	Benzenoids	Phenols	Benzenetriols and derivatives	5.1602e+06	4.74358e+06	5.3352e+06	6.95213e+06	5.15916e+06	5.52817e+06	6.62884e+06	6.99932e+06	4.04878e+06	4.88174e+06	5.72077e+06	6.97062e+06	5.5994e+06	5.59975e+06	5.72469e+06
1,2,3-Trihydroxybenzene	125.023	533.727				9.67807e+07	5.36431e+07	6.23746e+07	2.3806e+07	3.44645e+07	2.8714e+07	4.37764e+07	3.45974e+07	3.60592e+07	8.77501e+07	1.03567e+08	3.15389e+07	9.64471e+07	8.07263e+07	9.64536e+07
1,2,4-benzenetricarboxylic acid	209.012	728.24	Organic acids and derivatives	Carboxylic acids and derivatives	Tricarboxylic acids and derivatives	1.30681e+06	778491	1.21126e+06	1.01798e+06	1.6078e+06	1.62612e+06	2.31953e+06	2.08474e+06	2.05082e+06	1.23317e+06	2.35446e+06	2.05939e+06	2.01761e+06	2.14072e+06	2.13012e+06
1,2,4-benzenetriol	125.023	430.852	Benzenoids	Phenols	Benzenetriols and derivatives	4.22995e+07	4.12627e+07	4.05245e+07	3.98408e+07	3.88047e+07	4.18232e+07	4.99945e+07	4.91744e+07	5.02108e+07	3.26044e+07	4.70881e+07	4.86095e+07	4.9331e+07	4.93926e+07	5.04981e+07
1,2-dihexadecanoyl-sn-glycero-3-phosphate	647.466	343.239	Lipids and lipid-like molecules	Glycerophospholipids	Glycerophosphates	2.91557e+06	2.26521e+06	1.71285e+06	1.85445e+06	530955	405769	3.38265e+06	1.92623e+06	5.60881e+06	5.68223e+06	4.19267e+06	2.51747e+06	2.47336e+06	2.78533e+06	2.4703e+06
1,2-dipalmitoyl-sn-glycero-3-phospho-(1'-rac-glycerol)	721.505	113.53	Lipids and lipid-like molecules	Glycerophospholipids	Glycerophosphoglycerols	9.36917e+07	6.11132e+07	6.0038e+07	5.74652e+07	2.73517e+07	3.61392e+07	9.25428e+07	6.62017e+07	7.64443e+07	9.15587e+07	6.9373e+07	5.31293e+07	5.78181e+07	5.7578e+07	5.36161e+07
1-(3,4-dichlorophenyl)-3,3-dimethylurea	231.018	381.241	Benzenoids	Benzene and substituted derivatives	N-phenylureas	3.01555e+06	2.69253e+06	2.71686e+06	2.43556e+06	2.48045e+06	2.24814e+06	4.06992e+06	4.2224e+06	4.33575e+06	2.93559e+06	3.97298e+06	4.09415e+06	4.13822e+06	4.14155e+06	4.27264e+06
1,3-cyclobutanedicarboxylic acid, 2,4-diphenyl-, 1-(1-naphthalenyl) ester, (1.beta.,2r,3.alpha.,4r)-	421.166	382.098				2.74642e+06	3.17666e+06	2.83725e+06	3.87376e+06	2.92786e+06	3.3351e+06	3.80656e+06	4.00078e+06	3.69946e+06	3.00639e+06	3.79621e+06	3.93943e+06	3.87403e+06	3.94898e+06	3.89442e+06
1,3-Dicaffeoylquinic acid	515.121	295.004				5.69867e+06	2.9553e+06	3.08977e+06	708830	650706	593734	9.20479e+06	9.97984e+06	6.74155e+06	2.81227e+06	2.09829e+06	1.34897e+06	4.83772e+06	4.93411e+06	5.42457e+06
13-hydroxy-4z,7z,10z,14e,16z,19z-docosahexaenoic acid	343.25	101.033	Lipids and lipid-like molecules	Fatty Acyls	Fatty acids and conjugates	3.18438e+07	3.14058e+07	1.12437e+07	3.52952e+07	6.32802e+07	2.00463e+07	1.88188e+07	3.02065e+07	1.60119e+07	1.39039e+07	4.12906e+07	1.77521e+07	2.25201e+07	2.05031e+07	2.25149e+07
1,4-butynediol	85.028	873.656	Organic oxygen compounds	Organooxygen compounds	Alcohols and polyols	1.21848e+08	1.8044e+08	1.71511e+08	1.25955e+08	1.63523e+08	1.51198e+08	1.20701e+08	1.5089e+08	1.28636e+08	1.39093e+08	1.30212e+08	1.30359e+08	1.4896e+08	1.49139e+08	1.59326e+08
1,4-d-xylobiose	317.056	684.498	Organic oxygen compounds	Organooxygen compounds	Carbohydrates and carbohydrate conjugates	1.10621e+09	1.06255e+09	9.96459e+08	1.20566e+09	1.30549e+09	1.28296e+09	1.08688e+09	1.15535e+09	1.17896e+09	1.1097e+09	1.37418e+09	1.39334e+09	1.37488e+09	1.37606e+09	1.3829e+09
1,5-dicaffeoylquinic acid	515.142	656.492	Organic oxygen compounds	Organooxygen compounds	Alcohols and polyols	1.98492e+07	1.91013e+07	1.91212e+07	1.71029e+07	1.6388e+07	1.74299e+07	2.23098e+07	2.42328e+07	2.25428e+07	1.64417e+07	1.73258e+07	1.86938e+07	1.90223e+07	1.95027e+07	1.90291e+07
16-hydroxy-4z,7z,10z,13z,17e,19z-docosahexaenoic acid	343.25	153.682	Lipids and lipid-like molecules	Fatty Acyls	Fatty acids and conjugates	4.48582e+06	3.35435e+06	6.00426e+06	3.35058e+06	1.33038e+07	4.41607e+06	1.49017e+07	3.2684e+06	4.87139e+06	5.58789e+06	5.10151e+06	1.83498e+07	8.92271e+06	7.65609e+06	7.85484e+06
1-(9z,12z-octadecadienoyl)-2-hydroxy-sn-glycero-3-phosphoethanolamine	476.28	337.799	Lipids and lipid-like molecules	Fatty Acyls	Lineolic acids and derivatives	6.42046e+06	6.28356e+06	5.51809e+06	5.72309e+06	7.74146e+06	6.89244e+06	4.03152e+06	4.07791e+06	4.26737e+06	6.85597e+06	6.91157e+06	7.0465e+06	7.99011e+06	7.54745e+06	7.55829e+06
1-aminocyclopropanecarboxylic acid	100.039	733.702	Organic acids and derivatives	Carboxylic acids and derivatives	Amino acids, peptides, and analogues	1.16367e+07	1.20797e+07	1.20581e+07	1.00059e+07	9.87234e+06	1.14942e+07	2.73938e+07	2.96355e+07	2.61444e+07	1.57247e+07	1.90303e+07	2.16893e+07	1.98636e+07	1.99957e+07	2.03478e+07
[(1as,1bs,5s,5as,6s)-6-hydroxy-6-(hydroxymethyl)-2-[[(2r,3r,4s,5s,6r)-3,4,5-trihydroxy-6-(hydroxymethyl)oxan-2-yl]oxymethyl]-1b,5,5a,6a-tetrahydro-1ah-oxireno[3,4]cyclopenta[1,3-d]pyran-5-yl] 3-methylbutanoate	475.184	373.815	Organic oxygen compounds	Organooxygen compounds	Carbohydrates and carbohydrate conjugates	1.26676e+07	1.30311e+07	1.2018e+07	9.84771e+06	1.09869e+07	1.04203e+07	1.48292e+07	1.49563e+07	1.48445e+07	1.32759e+07	1.63405e+07	1.79414e+07	1.50543e+07	1.51092e+07	1.52565e+07
1-Hexadecanoyl-2-(9Z,12Z-octadecadienoyl)-sn-glycero-3-phosphoric acid	671.468	334.728				4.9917e+08	5.81394e+08	4.84901e+08	6.11672e+08	2.15089e+08	3.02706e+08	2.92e+08	3.57279e+08	5.01026e+08	3.85773e+08	4.01644e+08	3.8585e+08	3.67741e+08	3.48141e+08	3.48194e+08
1h-indole-6-carboxamide, n-hydroxy-1-[(4-methoxyphenyl)methyl]-	189.088	679.543	Organoheterocyclic compounds	Indoles and derivatives	Indolecarboxylic acids and derivatives	4.24119e+07	4.75828e+07	4.1046e+07	4.68537e+07	5.05879e+07	4.56326e+07	3.72304e+07	3.97167e+07	3.88338e+07	4.40857e+07	5.23531e+07	5.38073e+07	4.91088e+07	5.02749e+07	5.02758e+07
1h-pyrrole-3-propanoic acid, 5-[(1,2-dihydro-2-oxo-3h-indol-3-ylidene)methyl]-2,4-dimethyl-	291.131	681.556	Organoheterocyclic compounds	Indoles and derivatives	Indolines	1.45915e+07	1.49375e+07	1.39929e+07	1.42329e+07	1.70794e+07	1.60169e+07	1.21176e+07	1.20349e+07	1.31621e+07	1.2496e+07	1.74736e+07	1.73867e+07	1.61225e+07	1.60782e+07	1.60782e+07
1-hydroxy-2-naphthoic acid	187.06	679.521	Benzenoids	Naphthalenes	Naphthalenecarboxylic acids and derivatives	5.85381e+06	7.25292e+06	6.50627e+06	7.58869e+06	6.5871e+06	8.05895e+06	7.92029e+06	8.12869e+06	7.11853e+06	6.28645e+06	8.08347e+06	8.73917e+06	8.34198e+06	8.78793e+06	8.34258e+06
1-methylguanosine	296.101	341.253	"Nucleosides, nucleotides, and analogues"	Purine nucleosides		8.86021e+06	9.17658e+06	9.25105e+06	8.92699e+06	1.17475e+07	1.09066e+07	1.16591e+07	1.29856e+07	9.22214e+06	7.64694e+06	1.2467e+07	1.35966e+07	1.27211e+07	1.18585e+07	1.27071e+07
1-Methylpseudouridine	257.078	290.117				3.39418e+06	3.89839e+06	3.47829e+06	3.99263e+06	4.32596e+06	4.01303e+06	4.63587e+06	4.3455e+06	4.72101e+06	4.25262e+06	4.82431e+06	4.76309e+06	4.71854e+06	4.88436e+06	4.88268e+06
1-o-(9z-octadecenyl)-sn-glycero-2,3-cyclic-phosphate	403.265	48.1536				4.38048e+06	4.96185e+06	4.27678e+06	3.82279e+06	8.67124e+06	7.24504e+06	6.80741e+06	5.56086e+06	4.86788e+06	4.66007e+06	5.16988e+06	6.07989e+06	1.05507e+07	1.07515e+07	1.07507e+07
1-palmitoyl-2-hydroxy-sn-glycero-3-phospho-(1'-rac-glycerol)	483.274	257.819	Lipids and lipid-like molecules	Glycerophospholipids	Glycerophosphoglycerols	9.98937e+06	1.38555e+07	8.5212e+06	1.33644e+07	6.78913e+06	6.87441e+06	1.07889e+07	8.9727e+06	1.08482e+07	1.9987e+07	1.05703e+07	1.12794e+07	9.15599e+06	9.15449e+06	9.32439e+06
1-palmitoyl-2-hydroxy-sn-glycero-3-phosphoethanolamine	452.28	353.519	Lipids and lipid-like molecules	Glycerophospholipids	Glycerophosphoethanolamines	7.94847e+06	7.8377e+06	6.59734e+06	6.49609e+06	6.63116e+06	8.00192e+06	7.34529e+06	7.96129e+06	9.51491e+06	7.93832e+06	1.03788e+07	7.34973e+06	7.63977e+06	7.53148e+06	7.64097e+06
1-palmitoyl-2-linoleoyl-sn-glycero-3-phospho-(1'-rac-glycerol)	745.505	106.618	Lipids and lipid-like molecules	Glycerophospholipids	Glycerophosphoglycerols	5.52845e+07	5.64539e+07	4.86122e+07	3.92632e+07	2.60104e+07	2.99189e+07	4.42152e+07	4.42209e+07	2.93462e+07	4.29983e+07	4.33463e+07	3.1685e+07	4.33714e+07	4.24962e+07	4.34186e+07
1-Palmitoyl Lysophosphatidic Acid	431.221	445.896				1.86641e+07	2.55631e+07	1.58855e+07	1.92449e+07	1.8693e+07	1.69578e+07	1.34162e+07	1.53701e+07	1.55396e+07	1.78066e+07	3.02015e+07	2.78258e+07	2.31295e+07	2.3169e+07	2.47846e+07
1-stearoyl-2-linoleoyl-sn-glycero-3-phosphate	699.499	296.385	Lipids and lipid-like molecules	Glycerophospholipids	Glycerophosphates	9.5963e+06	7.53363e+06	5.36186e+06	1.25468e+07	5.00466e+06	1.1545e+07	1.11926e+07	1.48512e+07	1.44671e+07	638014	1.13505e+07	1.75804e+07	2.09398e+07	2.40271e+07	2.37298e+07
1-stearoyl-2-linoleoyl-sn-glycero-3-phosphoethanolamine	742.542	248.446	Lipids and lipid-like molecules	Glycerophospholipids	Glycerophosphoethanolamines	2.37853e+07	2.40908e+07	2.44255e+07	1.73086e+07	4.71911e+06	7.88653e+06	1.73254e+07	1.65431e+07	1.4644e+07	1.63421e+07	1.52747e+07	1.32898e+07	1.40025e+07	1.42923e+07	1.4293e+07
2-[[1-(4-nitrobenzoyl)pyrrolidine-2-carbonyl]amino]benzoic acid	382.105	702.393	Benzenoids	Benzene and substituted derivatives	Benzoic acids and derivatives	1.68045e+06	1.5176e+06	1.26941e+06	1.85944e+06	1.71073e+06	6.11884e+06	1.5763e+06	1.81957e+06	1.47136e+06	1.60535e+06	1.47222e+06	1.78135e+06	1.67275e+06	1.65012e+06	1.67191e+06
21-hydroxyprogesterone	329.234	243.952	Lipids and lipid-like molecules	Steroids and steroid derivatives	Hydroxysteroids	4.03948e+07	4.85877e+07	5.94462e+07	7.60214e+07	6.52719e+07	7.15872e+07	5.78048e+07	4.22604e+07	5.1683e+07	8.37447e+07	8.14642e+07	1.0768e+08	6.77466e+07	6.77326e+07	6.99226e+07
2,3-dihydroxybenzoic acid	153.03	422.392	Benzenoids	Benzene and substituted derivatives	Benzoic acids and derivatives	1.33198e+07	1.35259e+07	1.29951e+07	1.32461e+07	1.39015e+07	1.33471e+07	1.5924e+07	1.66571e+07	1.60734e+07	1.40674e+07	1.70921e+07	1.80105e+07	1.56994e+07	1.57949e+07	1.57949e+07
2,4,5-trichlorophenol	196.895	865.434	Benzenoids	Phenols	Halophenols	2.97684e+07	3.39504e+07	3.19979e+07	3.00659e+07	2.64737e+07	2.91594e+07	3.71119e+07	2.74038e+07	3.05258e+07	4.97535e+07	4.09581e+07	3.73411e+07	2.74611e+07	2.82863e+07	2.83024e+07
2,4,6-trichlorophenol	194.906	1161.31	Benzenoids	Phenols	Halophenols	8.3785e+07	5.67699e+07	1.64548e+08	1.72378e+08	7.34467e+07	1.29213e+08	7.63943e+07	1.69128e+08	9.66758e+07	9.57166e+07	1.54468e+08	1.88986e+08	7.59748e+07	6.95395e+07	6.92166e+07
2,4-dichlorobenzoic acid	188.951	79.4774	Benzenoids	Benzene and substituted derivatives	Benzoic acids and derivatives	1.20551e+07	1.19892e+07	1.20048e+07	1.26264e+07	1.23264e+07	1.19176e+07	1.09683e+07	1.19883e+07	1.2212e+07	1.25059e+07	1.51105e+07	1.16115e+07	1.18532e+07	1.18602e+07	1.12284e+07
2,4-dichlorophenol	124.991	270.227	Benzenoids	Benzene and substituted derivatives	Halobenzenes	2.26382e+07	2.02849e+07	2.18356e+07	3.71459e+06	2.24849e+07	4.221e+06	3.00376e+07	3.20702e+07	3.27081e+07	2.48118e+07	3.46604e+06	3.82376e+06	3.13471e+07	3.23741e+07	3.15536e+07
2,5-furandicarboxylic acid	111.019	270.162	Organoheterocyclic compounds	Furans	Furoic acid and derivatives	1.66245e+08	1.64303e+08	1.63031e+08	1.62677e+08	1.73557e+08	1.72288e+08	1.93517e+08	1.93469e+08	1.94986e+08	1.70452e+08	1.94568e+08	1.93025e+08	1.92895e+08	1.94235e+08	1.95329e+08
2',6'-dihydroxy 4'-methoxydihydrochalcone	152.034	269.44	Phenylpropanoids and polyketides	Linear 1,3-diarylpropanoids	Chalcones and dihydrochalcones	5.85304e+07	6.02206e+07	5.71183e+07	5.79235e+07	6.52238e+07	6.27334e+07	7.24959e+07	7.04006e+07	7.14729e+07	5.72294e+07	7.27272e+07	7.07668e+07	7.13916e+07	7.14114e+07	7.21651e+07
2,6-dihydroxybenzoic acid	153.019	37.1275	Benzenoids	Benzene and substituted derivatives	Benzoic acids and derivatives	1.49323e+07	1.51655e+07	1.40899e+07	1.08364e+07	1.10952e+07	1.10201e+07	1.39905e+07	1.58372e+07	1.61057e+07	1.40278e+07	1.86038e+07	1.96514e+07	1.61779e+07	1.61771e+07	1.63179e+07
2,8-quinolinediol	202.027	417.734	Organoheterocyclic compounds	Quinolines and derivatives	Quinolones and derivatives	1.24185e+07	8.91268e+06	5.54967e+06	8.12862e+06	7.2194e+06	1.41677e+07	9.25816e+06	3.66319e+06	1.67795e+07	2.17044e+06	6.18516e+06	1.70392e+07	8.46638e+06	8.14569e+06	8.12826e+06
2.alpha.-mannobiose	401.147	250.399	Organic oxygen compounds	Organooxygen compounds	Carbohydrates and carbohydrate conjugates	2.21687e+07	2.25851e+07	2.19205e+07	2.45522e+07	2.80149e+07	2.07265e+07	4.49301e+07	4.71901e+07	4.5815e+07	2.22245e+07	2.6703e+07	2.77265e+07	3.03524e+07	3.03152e+07	2.83834e+07
2-amino-4,6-dihydroxypyrimidine	126.019	428.938	Organoheterocyclic compounds	Diazines	Pyrimidines and pyrimidine derivatives	7.67166e+07	7.21714e+07	7.20421e+07	7.16257e+07	5.70214e+07	5.80646e+07	9.01411e+07	9.17903e+07	7.89897e+07	5.37003e+07	6.87932e+07	7.97839e+07	8.43554e+07	8.59232e+07	8.59159e+07
2-amino-4-nitrophenol	153.055	333.403	Benzenoids	Phenols	Nitrophenols	1.65047e+06	1.54834e+06	1.40918e+06	1.3624e+06	1.54179e+06	1.5049e+06	3.53456e+06	3.93821e+06	3.82208e+06	2.2699e+06	2.56176e+06	2.98606e+06	2.74328e+06	2.54448e+06	2.74088e+06
2-dehydro-3-deoxy-d-gluconate	177.04	432.391				4.47511e+06	1.14875e+07	8.62651e+06	5.67074e+06	4.72559e+06	6.28454e+06	7.83863e+06	1.15776e+07	5.96971e+06	4.78792e+06	5.51704e+06	7.18334e+06	1.40276e+07	1.12164e+07	1.12572e+07
2'-deoxyadenosine 5'-monophosphate	330.048	251.411	Nucleosides, nucleotides, and analogues	Purine nucleotides	Purine deoxyribonucleotides	3.33369e+08	2.54273e+08	3.50379e+08	1.60864e+08	2.37118e+08	3.1444e+08	5.60258e+08	5.05511e+08	2.32762e+08	1.63883e+08	4.54489e+08	2.37233e+08	3.39538e+08	3.75301e+08	3.76659e+08
2'-Deoxyinosine 5'-monophosphate	331.051	232.583	Nucleosides, nucleotides, and analogues	Purine nucleotides	Purine deoxyribonucleotides	1.72762e+07	1.73359e+07	7.59508e+06	6.62341e+06	4.26983e+06	4.22917e+06	1.17701e+07	9.72062e+06	1.32879e+07	5.60065e+06	3.31298e+06	1.66564e+07	1.43883e+07	1.28358e+07	1.42372e+07
2-deoxyribose 1-phosphate	213.017	166.833	Organic oxygen compounds	Organooxygen compounds	Carbohydrates and carbohydrate conjugates	2.63692e+07	2.65506e+07	2.36268e+07	2.5366e+07	2.00991e+07	2.10748e+07	2.19772e+07	3.68346e+07	2.05914e+07	2.16346e+07	2.56516e+07	3.47733e+07	2.25964e+07	2.38648e+07	2.45677e+07
(2e,6e,10e)-13-[(2r)-6-hydroxy-2,8-dimethyl-3,4-dihydrochromen-2-yl]-2,6,10-trimethyltrideca-2,6,10-trienoic acid	425.259	39.2944	Lipids and lipid-like molecules	Prenol lipids	Quinone and hydroquinone lipids	867320	1.14348e+06	1.10512e+06	1.15426e+06	1.28288e+06	756603	1.56308e+06	1.13935e+06	1.09876e+06	496703	812451	715967	1.21255e+06	1.21248e+06	1.23644e+06
2-Ethyl-2-Hydroxybutyric acid	131.07	168.844	Lipids and lipid-like molecules	Fatty Acyls	Fatty acids and conjugates	725144	961144	905276	490176	892381	1.31772e+06	835699	348970	230991	231423	293073	1.79104e+06	741303	753441	876736
2-fluoro-3-(trifluoromethyl)phenol	179.001	740.192	Benzenoids	Benzene and substituted derivatives	Trifluoromethylbenzenes	312420	310059	173029	301914	329194	151747	250147	449978	314872	284029	203627	342793	441782	443102	409538
2-Furoic acid	111.008	895.33	Organoheterocyclic compounds	Furans	Furoic acid and derivatives	4.47615e+08	9.22677e+08	1.20798e+09	1.08898e+09	1.94965e+09	1.15087e+09	1.26903e+09	1.2585e+09	1.72034e+09	5.27628e+08	1.03613e+09	9.74154e+08	1.15474e+09	1.17484e+09	1.1537e+09
2'-hydroxy-4'-methoxyacetophenone	165.055	55.5406	Organic oxygen compounds	Organooxygen compounds	Carbonyl compounds	1.79265e+07	1.86243e+07	1.89871e+07	2.10019e+07	2.56837e+07	2.24183e+07	1.38581e+07	1.48275e+07	1.44787e+07	2.02808e+07	2.0017e+07	1.85052e+07	1.67062e+07	1.67121e+07	1.70711e+07
2-hydroxy-butanoic acid	103.039	398.034				1.29642e+06	1.34622e+06	1.34702e+06	1.12159e+06	1.23406e+06	1.11069e+06	1.56045e+06	1.79237e+06	1.53139e+06	1.11785e+06	1.27842e+06	1.32873e+06	1.25664e+06	1.28852e+06	1.2882e+06
2-isopropylmalic acid	175.061	452.2	Lipids and lipid-like molecules	Fatty Acyls	Fatty acids and conjugates	3.3602e+07	3.89507e+07	3.66664e+07	2.23979e+07	5.43125e+07	2.47912e+07	2.51669e+07	3.33909e+07	3.23818e+07	1.98489e+07	3.12153e+07	2.17735e+07	4.64756e+07	5.19782e+07	4.63864e+07
2-keto-3-deoxyoctonic acid	237.062	678.498	Organic oxygen compounds	Organooxygen compounds	Carbohydrates and carbohydrate conjugates	7.6768e+07	7.61232e+07	7.25461e+07	7.27242e+07	7.86183e+07	7.35434e+07	8.56763e+07	8.83238e+07	8.93971e+07	6.82284e+07	9.55873e+07	9.5624e+07	9.06067e+07	9.13144e+07	9.08922e+07
2-linoleoyl-1-palmitoyl-sn-glycero-3-phosphoethanolamine	714.51	251.421	Lipids and lipid-like molecules	Glycerophospholipids	Glycerophosphoethanolamines	2.36878e+08	2.47879e+08	2.47181e+08	2.01139e+08	7.8445e+07	1.2519e+08	2.01214e+08	1.84953e+08	1.86248e+08	1.82492e+08	1.74635e+08	1.5943e+08	1.69214e+08	1.69212e+08	1.73438e+08
2-methylcinnamic acid	161.081	204.216	Phenylpropanoids and polyketides	Cinnamic acids and derivatives	Cinnamic acids	5.00354e+07	2.24393e+07	4.79409e+07	4.34673e+07	1.72947e+07	4.77295e+07	9.4481e+07	8.62772e+07	3.4496e+07	2.46347e+07	7.67803e+07	7.04387e+07	2.57679e+07	2.56492e+07	2.5952e+07
2-naphthyl-d-alanine	197.081	519.577				6.27217e+06	6.7331e+06	5.9039e+06	5.47832e+06	6.50056e+06	6.11399e+06	7.38222e+06	7.90715e+06	8.26206e+06	6.78037e+06	8.34656e+06	1.03738e+07	8.41514e+06	8.41573e+06	8.61701e+06
2'-O-methylguanosine	296.102	401.233				1.00813e+06	1.07669e+06	1.08224e+06	942087	1.01451e+06	1.03644e+06	1.33883e+06	1.51042e+06	1.427e+06	1.49537e+06	1.44683e+06	1.52528e+06	1.33414e+06	1.33427e+06	1.36139e+06
2'-o-methyluridine	257.079	136.041				6.35272e+06	3.77473e+06	6.11407e+06	8.36986e+06	8.64855e+06	8.92901e+06	7.35753e+06	7.97084e+06	7.85595e+06	8.42805e+06	1.04072e+07	1.0607e+07	9.18959e+06	9.17543e+06	9.18959e+06
2-oxoadipic acid	159.029	546.785	Organic acids and derivatives	Keto acids and derivatives	Medium-chain keto acids and derivatives	3.46782e+06	3.56786e+06	7.89296e+07	3.26088e+06	4.45909e+06	6.11679e+07	7.96883e+07	7.33271e+07	3.17316e+06	8.70365e+07	7.24748e+07	2.83853e+06	7.35148e+07	7.09546e+07	7.0914e+07
2-propylglutaric acid	173.093	519.629	Lipids and lipid-like molecules	Fatty Acyls	Fatty acids and conjugates	7.35821e+06	7.89918e+06	7.26959e+06	6.21964e+06	7.49678e+06	5.74375e+06	5.38218e+06	4.97141e+06	5.71166e+06	2.21193e+06	6.63258e+06	5.68661e+06	7.02347e+06	7.31347e+06	7.30815e+06
3,4-dihydroxyphenylacetic acid	167.034	77.5691	Benzenoids	Phenols	Benzenediols	4.20918e+06	3.30877e+06	3.94077e+06	2.19368e+06	2.88179e+06	2.31006e+06	2.98373e+06	2.91673e+06	2.75566e+06	2.92087e+06	2.63418e+06	2.87283e+06	2.58797e+06	2.67106e+06	2.6747e+06
3,5-di-tert-butyl-4-hydroxybenzoic acid	205.16	48.3399	Benzenoids	Benzene and substituted derivatives	Benzoic acids and derivatives	1.13798e+07	1.08284e+07	1.15717e+07	1.15607e+07	1.36488e+07	9.53065e+06	9.62806e+06	9.84193e+06	8.9491e+06	1.0593e+07	1.21e+07	1.04797e+07	1.14884e+07	1.14877e+07	1.13492e+07
3-(5-phenylthiophen-2-yl)prop-2-ynyl acetate	255.072	743.451	Organoheterocyclic compounds	Thiophenes	2,5-disubstituted thiophenes	6.68338e+06	6.12102e+06	6.10581e+06	4.16616e+06	5.87374e+06	5.63891e+06	7.63201e+06	8.68501e+06	7.95655e+06	5.0131e+06	7.37098e+06	8.4289e+06	7.82141e+06	7.82312e+06	8.02364e+06
3.alpha.-mannobiose	377.087	664.322	Organic oxygen compounds	Organooxygen compounds	Carbohydrates and carbohydrate conjugates	9.03143e+06	9.5946e+06	9.67701e+06	9.43901e+06	8.65017e+06	9.05435e+06	8.5533e+06	9.23125e+06	8.56848e+06	9.16525e+06	1.01607e+07	9.18011e+06	9.53557e+06	9.53689e+06	9.66209e+06
3-dehydroquinic acid	171.029	438.743	Organic acids and derivatives	Hydroxy acids and derivatives	Alpha hydroxy acids and derivatives	1.53271e+07	1.65097e+07	1.46893e+07	1.25123e+07	3.56808e+06	3.926e+06	2.25036e+07	7.36232e+06	5.98736e+06	9.9729e+06	4.94986e+06	7.30446e+06	4.3457e+06	4.31157e+06	2.62852e+06
3-deoxy-d-glycero-d-galacto-2-nonulosonic acid	129.018	112.928	Organic oxygen compounds	Organooxygen compounds	Carbohydrates and carbohydrate conjugates	8.09456e+07	7.41079e+07	7.24792e+07	7.53252e+07	9.26114e+07	9.54433e+07	1.79543e+08	1.54058e+08	9.58242e+07	6.66791e+07	8.90028e+07	1.76589e+08	1.16725e+08	1.45093e+08	1.17293e+08
3-furancarboxylic acid, tetrahydro-4-methylene-5-oxo-2-propyl-, (2r,3s)-rel-	183.049	54.5287	Organoheterocyclic compounds	Lactones	Gamma butyrolactones	1.93546e+07	2.11272e+07	1.8975e+07	1.61536e+07	1.88198e+07	1.9597e+07	1.99508e+07	2.01617e+07	2.06156e+07	1.70302e+07	1.7655e+07	2.37649e+07	2.17829e+07	2.17928e+07	2.39206e+07
3-hydroxy-3-methylglutaric acid	161.045	677.499	Lipids and lipid-like molecules	Fatty Acyls	Fatty acids and conjugates	1.17346e+08	1.17401e+08	1.12946e+08	1.01542e+08	8.86529e+07	1.04252e+08	1.64143e+08	1.75628e+08	1.73797e+08	1.04263e+08	1.13658e+08	1.25799e+08	1.3383e+08	1.27494e+08	1.3378e+08
3-hydroxy-4-methoxycinnamic acid	193.013	315.722	Phenylpropanoids and polyketides	Cinnamic acids and derivatives	Hydroxycinnamic acids and derivatives	1.15612e+07	1.12142e+07	1.03249e+07	1.12749e+07	1.28179e+07	1.2519e+07	9.5146e+06	1.11389e+07	1.12469e+07	1.12115e+07	1.35471e+07	1.58197e+07	1.42427e+07	1.42365e+07	1.45063e+07
3-hydroxybenzaldehyde	121.029	57.2455	Organic oxygen compounds	Organooxygen compounds	Carbonyl compounds	9.03092e+06	1.20791e+07	1.04712e+07	1.06999e+07	8.89298e+06	1.10057e+07	8.79779e+06	7.26225e+06	7.60338e+06	6.5694e+06	4.79708e+06	5.79281e+06	7.51509e+06	7.47868e+06	7.90593e+06
3-hydroxybenzoic acid	137.024	626.179	Benzenoids	Benzene and substituted derivatives	Benzoic acids and derivatives	1.91846e+07	1.83074e+07	1.83886e+07	1.95115e+07	2.08177e+07	2.02069e+07	2.17549e+07	2.18521e+07	2.20577e+07	1.79111e+07	2.08396e+07	2.11597e+07	2.22177e+07	2.21206e+07	2.22517e+07
3-hydroxybutyric acid	103.039	738.034	Organic acids and derivatives	Hydroxy acids and derivatives	Beta hydroxy acids and derivatives	2.91013e+06	2.86736e+06	2.57086e+06	2.40141e+06	2.3229e+06	2.60875e+06	4.40249e+06	4.16847e+06	3.83918e+06	2.3129e+06	2.98129e+06	4.0755e+06	3.25184e+06	3.30719e+06	3.30744e+06
3'-hydroxyflavanone	239.078	744.44	Phenylpropanoids and polyketides	Flavonoids	Flavans	1.13722e+06	1.11446e+06	849587	1.03106e+06	940023	1.45534e+06	1.77811e+06	1.26764e+06	2.14399e+06	815075	1.10667e+06	1.34876e+06	813289	816309	850375
3-hydroxyglutaric acid	147.029	451.78	Organic acids and derivatives	Hydroxy acids and derivatives	Beta hydroxy acids and derivatives	2.39178e+07	1.45672e+07	1.89763e+07	7.867e+06	2.64237e+07	3.80819e+07	2.28747e+07	1.79488e+07	1.71299e+07	2.67416e+07	1.38117e+07	1.79126e+07	1.80727e+07	1.72775e+07	2.43359e+07
3-hydroxyphenylacetic acid	107.035	263.036	Benzenoids	Phenols	1-hydroxy-4-unsubstituted benzenoids	2.9327e+07	2.78688e+07	2.65317e+07	2.70862e+07	2.4357e+07	2.43547e+07	2.91333e+07	2.90185e+07	3.14063e+07	2.63696e+07	3.06961e+07	3.48632e+07	3.06997e+07	3.07e+07	3.11931e+07
3-methyl-2-oxobutyric acid	115.087	580.261	Organic acids and derivatives	Keto acids and derivatives	Short-chain keto acids and derivatives	1.09017e+06	1.25618e+06	1.20167e+06	1.23004e+06	1.27649e+06	1.16897e+06	1.6907e+06	1.71401e+06	1.71191e+06	1.16615e+06	1.7153e+06	1.63966e+06	1.63223e+06	1.63413e+06	1.68476e+06
3-Methyl-2-oxopentanoate	189.077	507.736	Organic acids and derivatives	Keto acids and derivatives	Short-chain keto acids and derivatives	1.65814e+06	1.9172e+06	1.79199e+06	1.52914e+06	1.16909e+06	1.44708e+06	3.10949e+06	3.47414e+06	3.34086e+06	3.50823e+06	4.138e+06	4.45426e+06	2.97741e+06	3.12997e+06	3.14502e+06
3-methylphenylacetic acid	149.045	539.458	Benzenoids	Benzene and substituted derivatives	Toluenes	6.85897e+08	1.86034e+08	3.75374e+08	3.00372e+08	2.2782e+08	2.25833e+08	2.22641e+08	3.03261e+08	7.83933e+08	1.75784e+08	1.72219e+08	3.03335e+08	2.0508e+08	2.24494e+08	2.24216e+08
3-pyridinecarboxylic acid, 2-[(2-phenylethyl)thio]-	258.063	847.386	Organoheterocyclic compounds	Pyridines and derivatives	Pyridinecarboxylic acids and derivatives	939608	844047	827860	766866	610991	672437	1.28772e+06	1.34707e+06	1.42002e+06	739785	947093	921008	1.06893e+06	1.06737e+06	1.10096e+06
3R-hydroxy-butanoic acid	103.039	708.749				2.54085e+07	2.74503e+07	2.76741e+07	2.15909e+07	2.01951e+07	1.21766e+06	1.89874e+06	1.71447e+07	3.64441e+06	3.35706e+07	1.94727e+07	2.88331e+06	1.64197e+07	1.6509e+07	8.82028e+06
(3s,6r,6as,7s)-6,6a,7,8-tetrahydroxy-3-methyl-3,4,5,6,7,12a-hexahydro-2h-benzo[a]anthracene-1,12-dione	343.105	182.612				3.12875e+07	3.09771e+07	3.52616e+07	3.08156e+07	2.83795e+07	3.14046e+07	4.70276e+07	2.77981e+07	4.24692e+07	3.3562e+07	2.87217e+07	3.50818e+07	2.74843e+07	2.48705e+07	2.75211e+07
4-acetamidobutanoate	144.066	731.345	Organic acids and derivatives	Carboxylic acids and derivatives	Amino acids, peptides, and analogues	4.19485e+06	3.96052e+06	4.01416e+06	4.42115e+06	4.63508e+06	5.07942e+06	5.09143e+06	5.085e+06	5.12979e+06	4.69842e+06	5.16543e+06	6.77232e+06	5.05584e+06	5.05837e+06	5.14686e+06
4-Aminobutyric acid(GABA)	102.055	854.333	Organic acids and derivatives	Carboxylic acids and derivatives	Amino acids, peptides, and analogues	5.80006e+07	6.57037e+07	6.12677e+07	6.72957e+07	6.37973e+07	6.88276e+07	6.23695e+07	6.64648e+07	6.44827e+07	5.54473e+07	6.10789e+07	6.7779e+07	6.24632e+07	6.26459e+07	6.41284e+07
4-aminosalicylic acid	108.044	55.1818	Benzenoids	Benzene and substituted derivatives	Benzoic acids and derivatives	4.14892e+06	4.13851e+06	4.02149e+06	6.0984e+06	4.2639e+06	5.48448e+06	4.16574e+06	5.40896e+06	4.03276e+06	3.33174e+06	4.07045e+06	5.54198e+06	4.30433e+06	4.31912e+06	4.47397e+06
4'-demethylpodophyllotoxin	399.096	704.418	Lignans, neolignans and related compounds	Lignan lactones	Podophyllotoxins	1.67311e+07	1.8119e+07	1.59181e+07	1.69797e+07	2.10891e+07	2.40759e+07	2.75359e+07	2.90173e+07	2.75246e+07	1.48935e+07	2.75432e+07	2.76575e+07	2.51724e+07	2.53904e+07	2.61158e+07
4-hydroxy-2-chlorobiphenyl	203.02	698.931	Benzenoids	Benzene and substituted derivatives	Biphenyls and derivatives	3.32917e+06	3.27271e+06	3.04287e+06	3.63887e+06	3.48942e+06	3.84071e+06	3.72272e+06	3.87063e+06	3.952e+06	3.15668e+06	4.31494e+06	4.03793e+06	4.2453e+06	4.24465e+06	4.32228e+06
4-Hydroxybenzoate	137.023	547.218	Benzenoids	Benzene and substituted derivatives	Benzoic acids and derivatives	2.27953e+06	2.4883e+06	2.38145e+06	2.18345e+06	2.53232e+06	1.89253e+06	1.94933e+06	2.51736e+06	2.28558e+06	1.85543e+06	2.92824e+06	1.97309e+06	2.57345e+06	2.42899e+06	2.57302e+06
4-imidazoleacrylic acid	137.023	53.0627	Organoheterocyclic compounds	Azoles	Imidazoles	2.04542e+08	2.0221e+08	1.9893e+08	2.11371e+08	2.31135e+08	2.08581e+08	1.9693e+08	2.14401e+08	2.03659e+08	1.77577e+08	1.96641e+08	1.92393e+08	2.13914e+08	2.17077e+08	2.16841e+08
4-methylcatechol	123.044	563.793	Benzenoids	Phenols	Benzenediols	6.27607e+06	4.09025e+06	1.21128e+06	3.40997e+06	3.11491e+06	2.79196e+06	3.30964e+06	3.77447e+06	3.58665e+06	2.32476e+06	2.86252e+06	3.57639e+06	6.23978e+06	4.97188e+06	4.89354e+06
4-morpholinopropanesulfonic acid	208.065	336.749	Organoheterocyclic compounds	Oxazinanes	Morpholines	49058.5	111406	40468.8	244057	74577	62777.6	6.77741e+07	7.31972e+07	6.98296e+07	169302	142912	365899	1.80835e+07	1.76652e+07	1.80832e+07
4-pyridoxic acid	182.045	55.0625	Organoheterocyclic compounds	Pyridines and derivatives	Pyridinecarboxylic acids and derivatives	2.49868e+08	2.61314e+08	2.50407e+08	2.12346e+08	2.4471e+08	2.71632e+08	2.59154e+08	2.37612e+08	2.58414e+08	2.01947e+08	2.35415e+08	2.62253e+08	2.49672e+08	2.49959e+08	2.61911e+08
4-vinylphenol	119.049	247.411	Benzenoids	Benzene and substituted derivatives	Styrenes	4.71262e+06	5.18449e+06	8.70702e+06	4.90057e+06	2.84854e+06	5.3247e+06	9.99769e+06	4.25628e+06	4.43169e+06	3.7602e+06	4.72071e+06	4.78579e+06	5.99044e+06	4.95321e+06	4.87009e+06
5,6,7,8-tetrahydro-2-Naphthoic Acid	351.167	368.495				1.61662e+07	1.64923e+07	1.56592e+07	9.61227e+06	1.00336e+07	1.04426e+07	3.4198e+07	3.89011e+07	3.69064e+07	1.67521e+07	2.2586e+07	2.40246e+07	2.34882e+07	2.34909e+07	2.38116e+07
5-aminoimidazole-4-carboxamide	125.035	681.523	Organoheterocyclic compounds	Azoles	Imidazoles	4.8296e+07	4.83132e+07	4.65604e+07	4.82745e+07	5.10751e+07	4.9973e+07	4.92179e+07	4.47663e+07	4.10371e+07	4.46432e+07	5.09255e+07	5.33882e+07	5.54305e+07	5.5254e+07	5.56703e+07
5-Aminopentanoic acid	116.071	807.119	Organic acids and derivatives	Carboxylic acids and derivatives	"Amino acids, peptides, and analogues"	3.52786e+06	1.08445e+07	2.66615e+06	2.80259e+06	2.86146e+06	6.16624e+06	2.14631e+06	2.75028e+06	2.47777e+06	2.24957e+06	2.93923e+06	3.30114e+06	2.35655e+06	2.1815e+06	2.34848e+06
5-aminovaleric acid	116.071	652.215	Organic acids and derivatives	Carboxylic acids and derivatives	Amino acids, peptides, and analogues	1.7843e+07	1.83153e+07	1.71125e+07	1.74869e+07	1.6723e+07	1.81908e+07	2.34082e+07	2.36127e+07	2.36027e+07	2.36812e+07	2.85418e+07	3.21669e+07	2.44902e+07	2.45039e+07	2.49785e+07
5-azauracil	112.003	741.343	Organoheterocyclic compounds	Triazines	Triazinones	6.65852e+06	3.67992e+06	3.50436e+06	4.26965e+06	6.96476e+06	7.39633e+06	2.5832e+06	2.76785e+06	2.56902e+06	3.88419e+06	5.17822e+06	2.72489e+06	2.95176e+06	2.91072e+06	3.0583e+06
[5-ethenyl-3-hydroxy-4-(3-hydroxyprop-1-en-2-yl)-2-(3-methoxy-3-oxoprop-1-en-2-yl)-5-methylcyclohexyl] (z)-4-acetyloxy-2-(hydroxymethyl)but-2-enoate	451.22	453.719	Lipids and lipid-like molecules	Prenol lipids	Sesquiterpenoids	6.38543e+06	7.31228e+06	5.19162e+06	6.79381e+06	7.74746e+06	8.21226e+06	8.29888e+06	7.81117e+06	6.74697e+06	1.5323e+06	6.65714e+06	8.29556e+06	6.34577e+06	6.33262e+06	5.23844e+06
5-ethyl-2'-deoxyuridine	255.091	77.5444	Nucleosides, nucleotides, and analogues	Pyrimidine nucleosides	Pyrimidine 2'-deoxyribonucleosides	4.74066e+06	4.31216e+06	3.84013e+06	4.3988e+06	2.49427e+06	9.50679e+06	1.88266e+06	1.18632e+07	3.00311e+06	5.11829e+06	9.67941e+06	6.87505e+06	4.05116e+06	4.05741e+06	4.40511e+06
5-hydroxylysine	161.081	294.182	Organic acids and derivatives	Carboxylic acids and derivatives	Amino acids, peptides, and analogues	2.13284e+07	2.15066e+07	2.11701e+07	1.60367e+07	1.7157e+07	1.67135e+07	4.25112e+07	4.81634e+07	4.6754e+07	1.90069e+07	2.78072e+07	2.79687e+07	3.14989e+07	3.20918e+07	3.20734e+07
5-Hydroxytryptophan	219.099	579.334	Organoheterocyclic compounds	Indoles and derivatives	Tryptamines and derivatives	2.01022e+06	1.97115e+06	1.92862e+06	1.60287e+06	1.74886e+06	1.51358e+06	1.87797e+06	1.90901e+06	1.89256e+06	1.42904e+06	1.74124e+06	1.97659e+06	1.91432e+06	1.95106e+06	1.9671e+06
5-hydroxytryptophol	176.056	159.361	Organoheterocyclic compounds	Indoles and derivatives	Hydroxyindoles	6.48718e+07	2.28294e+07	2.39676e+07	2.27605e+07	2.50304e+07	1.86589e+07	2.23766e+07	2.38848e+07	3.86502e+07	2.70795e+07	2.29027e+07	2.67471e+07	2.46576e+07	2.61055e+07	2.44683e+07
5-methylbenzotriazole	132.048	188.773				1.82482e+07	8.83907e+06	1.48434e+07	2.61128e+07	2.23015e+07	3.08555e+07	5.97437e+07	3.48247e+07	4.23205e+07	2.05993e+07	8.55336e+06	1.24114e+07	5.74486e+07	5.75554e+07	6.34641e+07
5'-phosphoribosyl-5-amino-4-imidazolecarboxamide (aicar)	337.079	648.402	Nucleosides, nucleotides, and analogues	Imidazole ribonucleosides and ribonucleotides	1-ribosyl-imidazolecarboxamides	1.50099e+08	1.44568e+08	1.38279e+08	1.35555e+08	1.06334e+08	9.11163e+07	1.47888e+08	1.58649e+08	1.67656e+08	1.26828e+08	1.70215e+08	1.75042e+08	1.38851e+08	1.34002e+08	1.3412e+08
6:3+6o fatty acyl hexoside	353.074	824.439	Lipids and lipid-like molecules	Fatty Acyls	Fatty acyl glycosides	6.6272e+07	6.83993e+07	6.27872e+07	5.43157e+07	4.7057e+07	4.75684e+07	9.07274e+07	9.35402e+07	8.80886e+07	1.17724e+08	7.00913e+07	7.48722e+07	8.61436e+07	9.07738e+07	9.08483e+07
6-formylpterin	190.051	525.619	Organoheterocyclic compounds	Pteridines and derivatives	Pterins and derivatives	6.18535e+07	6.1403e+07	6.17575e+07	4.81377e+07	4.82348e+07	4.42058e+07	5.96146e+07	6.51936e+07	7.03327e+07	5.70439e+07	6.80617e+07	6.91168e+07	6.26776e+07	5.91018e+07	6.26411e+07
[6]-gingerol	293.178	100.3	Benzenoids	Phenols	Methoxyphenols	4.94568e+07	1.93308e+07	4.35057e+07	6.04615e+07	5.72215e+07	1.43201e+07	6.52215e+06	1.77999e+07	4.87485e+07	6.03976e+07	5.66922e+07	5.40406e+07	5.28797e+07	5.28919e+07	5.21508e+07
6-hydroxyhexanoate	131.07	211.536	Organic acids and derivatives	Hydroxy acids and derivatives	Medium-chain hydroxy acids and derivatives	2.73949e+07	7.2242e+07	2.545e+07	2.12346e+07	2.04303e+07	2.81984e+07	1.77387e+07	4.53273e+07	4.45512e+07	2.64448e+07	2.46068e+07	1.55707e+07	2.71538e+07	3.7969e+07	2.74645e+07
6-hydroxymelatonin	247.113	345.56	Organoheterocyclic compounds	Indoles and derivatives	Hydroxyindoles	3.03502e+06	2.97101e+06	3.01003e+06	2.01065e+06	2.77921e+06	2.28695e+06	2.93508e+06	2.52698e+06	2.63364e+06	279005	1.9786e+06	2.67024e+06	3.42042e+06	3.24283e+06	3.41773e+06
6-phosphogluconic acid	256.998	263.113	Organic oxygen compounds	Organooxygen compounds	Carbohydrates and carbohydrate conjugates	7.95147e+06	7.41558e+06	6.61552e+06	5.73569e+06	6.66037e+06	6.92413e+06	9.21259e+06	1.00633e+07	1.0703e+07	6.80122e+06	9.49782e+06	9.1375e+06	9.26224e+06	9.63375e+06	9.62523e+06
7,8-dihydroxy-4-methylcoumarin	383.079	623.959	Phenylpropanoids and polyketides	Coumarins and derivatives	Hydroxycoumarins	3.71408e+06	1.74583e+06	3.48379e+06	2.63743e+06	2.14072e+06	2.02516e+06	3.60101e+06	3.40774e+06	1.8719e+06	3.4241e+06	2.15463e+06	1.78813e+06	2.24809e+06	2.23066e+06	2.59816e+06
7-hydroxy-4-methylcoumarin-3-acetic acid	233.03	201.248	Phenylpropanoids and polyketides	Coumarins and derivatives	Hydroxycoumarins	3.56113e+07	6.74851e+07	1.33819e+07	3.95033e+07	7.52785e+07	4.80559e+07	1.64204e+07	1.71661e+07	2.99796e+07	2.21103e+07	1.17429e+07	2.61662e+07	3.35497e+07	3.38289e+07	3.75799e+07
7-methyl-1-[(2s,3r,4s,5s,6r)-3,4,5-trihydroxy-6-(hydroxymethyl)oxan-2-yl]oxy-1,4a,5,6,7,7a-hexahydrocyclopenta[c]pyran-4-carboxylic acid	359.136	519.523	Lipids and lipid-like molecules	Prenol lipids	Terpene glycosides	8.5439e+07	8.88056e+07	9.05773e+07	8.04216e+07	8.63759e+07	7.69369e+07	9.59365e+07	1.04713e+08	1.0934e+08	8.64412e+07	1.12147e+08	1.30649e+08	1.10003e+08	1.10033e+08	1.12516e+08
8-chlorotheophylline	213.017	228.606	Organoheterocyclic compounds	Imidazopyrimidines	Purines and purine derivatives	1.18829e+07	1.31016e+07	3.05007e+07	7.28089e+06	1.3135e+07	2.9019e+07	1.01601e+07	2.00846e+07	1.70305e+07	1.54216e+07	8.7392e+06	2.82732e+07	2.52314e+07	2.51751e+07	1.9709e+07
8-gingerol	321.211	36.2598	Benzenoids	Phenols	Methoxyphenols	2.13959e+06	2.63344e+06	2.22781e+06	2.71083e+06	2.32402e+06	1.73226e+06	3.60328e+06	2.46454e+06	3.50064e+06	1.1826e+06	1.76984e+06	1.45649e+06	2.71057e+06	2.60918e+06	2.60872e+06
8-hydroxyquinoline-2-carboxamide	187.036	539.325	Organoheterocyclic compounds	Quinolines and derivatives	Quinoline carboxamides	7.07176e+06	8.44e+06	6.0592e+06	5.17795e+06	5.23736e+06	5.34871e+06	9.29005e+06	8.94525e+06	1.13161e+07	8.65359e+06	9.44235e+06	8.91887e+06	9.10871e+06	9.54754e+06	9.10645e+06
9-hotre	293.213	111.49	Lipids and lipid-like molecules	Fatty Acyls	Lineolic acids and derivatives	9.2752e+06	9.04889e+06	8.65473e+06	6.25629e+06	3.81376e+06	8.22687e+06	9.04092e+06	8.64752e+06	8.50943e+06	8.79511e+06	9.21848e+06	8.31535e+06	9.25183e+06	9.2517e+06	9.18832e+06
9-hydroperoxy-10e,12z,15z-octadecatrienoic acid	309.208	57.3762	Lipids and lipid-like molecules	Fatty Acyls	Lineolic acids and derivatives	5.41115e+07	6.25022e+07	5.752e+07	5.71085e+07	5.15154e+07	5.17176e+07	6.38876e+07	3.44431e+07	5.44252e+07	4.92293e+07	3.10435e+07	3.81122e+07	5.09049e+07	5.02629e+07	5.02814e+07
9-hydroperoxy-10e,12z-octadecadienoic acid	293.213	57.304	Lipids and lipid-like molecules	Fatty Acyls	Lineolic acids and derivatives	5.2709e+07	5.52723e+07	5.2486e+07	5.52549e+07	5.07122e+07	5.50783e+07	9.36949e+07	5.29002e+07	7.58481e+07	5.34977e+07	4.15276e+07	4.21942e+07	5.89247e+07	5.80456e+07	5.89416e+07
9-hydroxy-10e,12z-octadecadienoic acid	295.229	91.2972	Lipids and lipid-like molecules	Fatty Acyls	Lineolic acids and derivatives	9.97732e+07	7.37549e+07	6.27132e+07	8.33175e+07	8.63868e+07	7.7521e+07	7.72606e+07	5.26669e+07	7.03043e+07	7.41945e+07	7.4677e+07	7.32229e+07	7.27988e+07	7.13652e+07	7.12895e+07
9-oxo-10(e),12(e)-octadecadienoic acid	293.213	81.7773	Lipids and lipid-like molecules	Fatty Acyls	Lineolic acids and derivatives	1.15999e+08	1.16383e+08	8.94512e+07	8.88559e+07	7.72259e+07	7.88514e+07	2.36027e+08	1.61127e+08	1.15996e+08	1.3514e+08	1.26058e+08	1.19415e+08	1.17948e+08	1.16682e+08	1.1648e+08
9-oxo-10e,12z,15z-octadecatrienoic acid	291.198	86.0696	Lipids and lipid-like molecules	Fatty Acyls	Lineolic acids and derivatives	4.19019e+07	3.45768e+07	2.11152e+07	3.34266e+07	2.65328e+07	2.68691e+07	4.59358e+07	3.87663e+07	4.60823e+07	5.41123e+07	4.5729e+07	4.09003e+07	3.81895e+07	3.81495e+07	3.78246e+07
9(S)-HODE	295.228	21.0056				2.05645e+06	614406	1.19562e+06	502923	398383	610951	487652	520739	766656	735608	753337	496539	1.22537e+06	1.38972e+06	1.20776e+06
(+)-abscisic acid	263.13	163.862	Lipids and lipid-like molecules	Prenol lipids	Sesquiterpenoids	5.01607e+07	4.73097e+07	5.85116e+07	5.08964e+07	4.52447e+07	4.60002e+07	4.7419e+07	5.17178e+07	5.03238e+07	5.03435e+07	6.10456e+07	6.42444e+07	5.42133e+07	5.42122e+07	5.33327e+07
Acamprosate	180.033	52.5319	Organic acids and derivatives	Organic sulfonic acids and derivatives	Organosulfonic acids and derivatives	2.10694e+07	2.57382e+07	2.35985e+07	2.4572e+07	1.94003e+07	3.0081e+07	3.02048e+07	1.61708e+07	2.03324e+07	1.33765e+07	1.43735e+07	1.32504e+07	2.24254e+07	2.25147e+07	2.45158e+07
Acetoxyvalerenic acid	291.146	368.741	Lipids and lipid-like molecules	Prenol lipids	Sesquiterpenoids	2.12518e+06	2.14682e+06	1.92017e+06	1.20005e+06	913906	1.07817e+06	5.44501e+06	6.35651e+06	5.68874e+06	2.38818e+06	3.62653e+06	3.92421e+06	3.32149e+06	3.36746e+06	3.38743e+06
Acetylcarnitine	202.09	232.306	Lipids and lipid-like molecules	Fatty Acyls	Fatty acid esters	6.38617e+06	5.92641e+06	5.5256e+06	5.84789e+06	2.34539e+06	6.95877e+06	8.40799e+06	1.07691e+07	1.87854e+07	1.33162e+07	9.8988e+06	1.19114e+07	9.3545e+06	1.03057e+07	9.353e+06
Acetyl-DL-Valine	158.082	718.15				951842	2.16537e+06	855698	966739	971569	975074	1.1054e+06	741054	803871	653702	1.0979e+06	1.05879e+06	1.35414e+06	1.16706e+06	1.16297e+06
Acetylglycine	116.034	159.423	Organic acids and derivatives	Carboxylic acids and derivatives	Amino acids, peptides, and analogues	5.68525e+07	4.34822e+07	4.72049e+07	1.65751e+08	3.2204e+07	3.33723e+07	4.74375e+07	3.89651e+07	2.61571e+07	2.96936e+08	3.22494e+07	4.79336e+07	3.68583e+07	3.47246e+07	3.56301e+07
Acetyl phosphate	176.936	866.642	Organic acids and derivatives	Organic phosphoric acids and derivatives	Phosphate esters	3.77652e+07	3.95778e+07	3.99895e+07	3.65258e+07	3.14255e+07	3.89364e+07	3.78335e+07	3.39482e+07	3.75656e+07	3.79726e+07	5.29044e+07	7.54481e+07	3.39596e+07	3.5037e+07	3.77636e+07
Adenosine 5'-diphosphoribose	540.055	822.52	Nucleosides, nucleotides, and analogues	Purine nucleotides	Purine nucleotide sugars	2.98252e+06	3.02066e+06	2.92174e+06	1.70549e+06	2.69462e+06	2.33903e+06	4.12075e+06	5.05104e+06	4.23577e+06	2.15483e+06	3.11197e+06	3.34143e+06	3.33738e+06	3.33819e+06	3.399e+06
Adenosine 5'-phosphosulfate	444.025	813.701	Nucleosides, nucleotides, and analogues	Purine nucleotides	Purine ribonucleotides	2.47982e+07	2.25408e+07	2.17509e+07	1.81233e+07	2.50753e+07	2.29405e+07	3.74471e+07	4.11874e+07	3.75197e+07	1.969e+07	2.43598e+07	2.36627e+07	3.57645e+07	3.57889e+07	3.64286e+07
Adipic acid	127.05	746.495	Lipids and lipid-like molecules	Fatty Acyls	Fatty acids and conjugates	3.08885e+06	4.4036e+06	4.75711e+06	5.27561e+06	3.76552e+06	4.57626e+06	4.24327e+06	5.90077e+06	5.38549e+06	4.44812e+06	4.02392e+06	7.94027e+06	3.86935e+06	3.80649e+06	4.31782e+06
Ala-asp	203.068	786.005	Organic acids and derivatives	Peptidomimetics	Hybrid peptides	1.88623e+06	2.07146e+06	2.0009e+06	1.60318e+06	1.95885e+06	1.75565e+06	1.92985e+06	1.92523e+06	1.95317e+06	1.46462e+06	338281	2.18413e+06	2.1251e+06	2.23415e+06	2.23342e+06
Ala-His	225.113	96.8401	Organic acids and derivatives	Carboxylic acids and derivatives	Amino acids, peptides, and analogues	6.16423e+06	9.55484e+06	5.25238e+06	6.78412e+06	7.67511e+06	5.87831e+06	1.73535e+07	1.20398e+07	2.03782e+07	8.52804e+06	1.33091e+07	1.13352e+07	1.08217e+07	1.16294e+07	1.0845e+07
Ala-Leu	201.124	461.897	Organic acids and derivatives	Carboxylic acids and derivatives	Amino acids, peptides, and analogues	2.48792e+07	2.22129e+07	2.18554e+07	1.74416e+07	1.66877e+07	1.794e+07	2.28067e+07	2.20241e+07	2.25779e+07	1.7191e+07	1.80671e+07	2.11303e+07	2.13767e+07	2.21352e+07	2.21347e+07
Ala-Met	219.081	476.767	Organic acids and derivatives	Carboxylic acids and derivatives	Amino acids, peptides, and analogues	2.95374e+06	2.81244e+06	2.76121e+06	1.95584e+06	2.19708e+06	2.06169e+06	2.4537e+06	2.57591e+06	2.93449e+06	2.19094e+06	2.06494e+06	2.77778e+06	2.81462e+06	2.81474e+06	2.87123e+06
Ala-Thr	189.088	568.229	Organic acids and derivatives	Carboxylic acids and derivatives	Amino acids, peptides, and analogues	1.35549e+06	1.38721e+06	1.37682e+06	1.20641e+06	889442	1.04939e+06	1.30726e+06	1.50292e+06	1.40409e+06	1.26147e+06	1.26117e+06	1.89385e+06	1.3328e+06	1.29803e+06	1.33262e+06
Allantoin	157.036	315.725	Organoheterocyclic compounds	Azoles	Imidazoles	9.25625e+08	9.27919e+08	9.11753e+08	9.62745e+08	1.05809e+09	1.03438e+09	8.27251e+08	8.57275e+08	8.49054e+08	9.6043e+08	1.06687e+09	1.13952e+09	1.06679e+09	1.05197e+09	1.0666e+09
Alloxan	159.01	755.058	Organoheterocyclic compounds	Diazines	Pyrimidines and pyrimidine derivatives	1.77855e+06	1.97761e+06	1.85296e+06	1.99522e+06	1.91289e+06	2.8797e+06	1.64618e+06	1.96834e+06	1.90331e+06	1.841e+06	2.31904e+06	1.44612e+06	1.88851e+06	1.88488e+06	1.99561e+06
Allyl isothiocyanate	98.0235	322.202				8.56082e+07	9.45833e+07	8.61602e+07	6.14227e+07	5.95501e+07	1.07378e+08	1.29451e+08	1.26436e+08	1.26354e+08	1.009e+08	7.25952e+07	9.29532e+07	8.29164e+07	8.29411e+07	8.05631e+07
.alpha.-d-galactose 1-phosphate	241.012	865.526	Organic oxygen compounds	Organooxygen compounds	Carbohydrates and carbohydrate conjugates	2.37231e+06	2.4179e+06	2.34743e+06	1.63139e+06	1.92914e+06	1.98306e+06	2.50409e+06	2.80296e+06	2.41598e+06	2.00369e+06	3.17959e+06	4.07874e+06	2.40145e+06	2.55137e+06	2.54808e+06
Alpha-D-Glucose	239.078	535.59	Organic oxygen compounds	Organooxygen compounds	Carbohydrates and carbohydrate conjugates	1.09664e+08	9.22654e+07	1.90803e+08	1.80256e+08	1.94145e+08	1.94673e+08	2.05836e+08	2.26866e+08	5.89708e+07	4.32657e+07	6.50331e+07	1.3265e+08	9.14458e+07	8.60961e+07	9.14393e+07
Alpha-d-glucose 1,6-bisphosphate	338.99	981.975	Organic oxygen compounds	Organooxygen compounds	Carbohydrates and carbohydrate conjugates	663267	983531	730554	354254	3.09411e+06	4.9083e+06	443504	306036	520866	154221	562851	714513	1.31433e+06	1.50163e+06	1.32006e+06
Amidosulfuron	368.046	728.191	Organic oxygen compounds	Organooxygen compounds	Ethers	1.52554e+06	1.70409e+06	1.73376e+06	2.2514e+06	4.97324e+06	5.81233e+06	3.06587e+06	3.61974e+06	2.32987e+06	1.36947e+06	2.55986e+06	3.18603e+06	3.37295e+06	3.53287e+06	3.52963e+06
Aminocyclopyrachlor	212.02	724.901	Organoheterocyclic compounds	Diazines	Pyrimidines and pyrimidine derivatives	1.53865e+06	1.62683e+06	1.83596e+06	1.78312e+06	849170	1.23742e+06	1.54529e+06	1.27916e+06	1.13633e+06	2.00817e+06	1.30862e+06	1.33641e+06	1.24039e+06	1.29551e+06	1.24371e+06
Ammelide	127.05	681.5	Organoheterocyclic compounds	Triazines	Triazinones	7.45615e+08	7.70625e+08	7.17275e+08	7.63582e+08	8.58155e+08	8.28499e+08	6.62784e+08	7.10192e+08	6.98944e+08	7.05647e+08	8.4092e+08	8.43822e+08	8.46428e+08	8.46608e+08	8.57551e+08
Androstendione	285.208	96.6982	Lipids and lipid-like molecules	Steroids and steroid derivatives	Androstane steroids	8.20161e+06	1.69568e+07	1.67761e+07	1.04391e+07	1.67655e+07	1.15351e+07	9.81226e+06	9.7175e+06	5.94359e+06	7.78047e+06	6.23629e+06	6.79547e+06	1.32973e+07	1.1698e+07	1.32216e+07
Arbutin	271.083	260.652	Organic oxygen compounds	Organooxygen compounds	Carbohydrates and carbohydrate conjugates	3.02213e+07	2.865e+07	2.75081e+07	2.91178e+07	3.17667e+07	3.05695e+07	3.17372e+07	3.27263e+07	3.26128e+07	3.69344e+07	4.15584e+07	4.3129e+07	3.34834e+07	3.34842e+07	3.38452e+07
Aspartic acid	132.029	850.965	Organic acids and derivatives	Carboxylic acids and derivatives	Amino acids, peptides, and analogues	1.89216e+07	1.85835e+07	4.81113e+06	2.51932e+06	4.95803e+06	4.8136e+06	1.76337e+07	3.10756e+06	1.75619e+07	2.05487e+07	1.8167e+07	9.36986e+07	5.16249e+06	4.48111e+06	4.45971e+06
Benzoic acid + 1o, o-hex	299.078	626.196	Organic oxygen compounds	Organooxygen compounds	Carbohydrates and carbohydrate conjugates	1.63217e+07	1.61165e+07	1.52127e+07	1.65459e+07	1.77681e+07	1.68297e+07	1.85697e+07	1.93358e+07	1.94323e+07	1.51229e+07	1.77639e+07	1.82411e+07	1.90278e+07	1.90276e+07	1.9266e+07
Benzoic acid, 2-fluoro-	139.006	119.437	Benzenoids	Benzene and substituted derivatives	Benzoic acids and derivatives	6.52629e+06	6.1721e+06	6.22716e+06	7.9472e+06	8.00053e+06	7.7689e+06	1.0162e+07	1.00844e+07	1.02132e+07	1.02452e+07	1.33152e+07	1.36053e+07	1.02509e+07	1.02544e+07	1.0523e+07
Benzoic acid, 3,6-dichloro-2-methoxy-	174.969	755.044	Benzenoids	Benzene and substituted derivatives	Benzoic acids and derivatives	1.69902e+07	1.69003e+07	1.5947e+07	1.81045e+07	1.80253e+07	1.80117e+07	1.34612e+07	1.51895e+07	1.43072e+07	1.35126e+07	1.72717e+07	1.74143e+07	1.75442e+07	1.76716e+07	1.80623e+07
Benzoic acid, 4-[[(5,6,7,8-tetrahydro-5,5,8,8-tetramethyl-2-naphthalenyl)carbonyl]amino]-	350.162	319.025	Benzenoids	Benzene and substituted derivatives	Anilides	1.73964e+07	1.95698e+07	1.64141e+07	1.50705e+07	1.30484e+07	1.32568e+07	1.77634e+07	2.02629e+07	1.93943e+07	1.17564e+07	2.21031e+07	2.05941e+07	2.06927e+07	2.12384e+07	2.07011e+07
Bestatin	307.177	601.238	Organic acids and derivatives	Peptidomimetics	Hybrid peptides	1.32923e+06	1.3995e+06	1.42725e+06	1.37771e+06	1.37486e+06	1.45178e+06	3.03935e+06	2.36553e+06	2.17352e+06	2.4425e+06	2.93327e+06	2.99175e+06	2.22416e+06	2.22396e+06	2.2542e+06
.beta.-glycerophosphate	171.006	820.223	Lipids and lipid-like molecules	Glycerophospholipids	Glycerophosphates	6.55947e+07	6.7332e+07	6.09908e+07	5.93851e+07	5.81078e+07	5.69093e+07	6.5842e+07	6.97358e+07	6.61603e+07	5.38415e+07	7.03169e+07	7.31754e+07	7.02444e+07	7.02679e+07	7.11216e+07
.beta.-hydroxypropionic acid	89.0234	755.979	Organic acids and derivatives	Hydroxy acids and derivatives	Beta hydroxy acids and derivatives	4.16555e+07	4.27633e+07	3.33168e+07	4.34441e+07	4.49944e+07	4.17916e+07	3.65136e+07	3.44704e+07	3.78344e+07	3.30667e+07	3.86288e+07	4.34986e+07	4.11464e+07	4.23485e+07	4.23319e+07
Betamethasone 21	433.209	427.904	Lipids and lipid-like molecules	Steroids and steroid derivatives	Pregnane steroids	4.91098e+06	4.6473e+06	4.44385e+06	4.24206e+06	5.35958e+06	4.25428e+06	5.04974e+06	6.18829e+06	5.40194e+06	4.62005e+06	6.65311e+06	7.31991e+06	7.52964e+06	6.90945e+06	7.51299e+06
Beta-n-methylaminoalanine	117.055	243.042	Organic acids and derivatives	Carboxylic acids and derivatives	Amino acids, peptides, and analogues	1.26569e+07	1.36557e+07	1.06639e+07	8.25452e+06	8.32987e+06	1.30808e+07	1.16505e+07	1.17535e+07	1.68988e+07	1.16517e+07	1.52835e+07	1.27079e+07	1.52414e+07	1.51561e+07	1.61651e+07
Bis(2-hydroxy-1-naphthyl)disulfide	175.025	430.377	Benzenoids	Naphthalenes	Naphthols and derivatives	5.81236e+06	1.57747e+07	8.55459e+06	4.91898e+06	1.27793e+07	9.27366e+06	7.73774e+06	7.1211e+06	7.27146e+06	3.93706e+06	6.2709e+06	9.71392e+06	9.03563e+06	9.02134e+06	9.5545e+06
Bisphenol af	335.044	763.145	Benzenoids	Benzene and substituted derivatives	Diphenylmethanes	6.57432e+07	9.22124e+07	7.40256e+07	3.64952e+07	2.26675e+07	3.04823e+07	1.67927e+08	1.91758e+08	1.68871e+08	5.17602e+07	7.26963e+07	1.06982e+08	1.02439e+08	1.05501e+08	1.05749e+08
Blood group b trisaccharide	487.18	679.565	Organic oxygen compounds	Organooxygen compounds	Carbohydrates and carbohydrate conjugates	6.83928e+07	6.91003e+07	5.97104e+07	6.23187e+07	6.67603e+07	6.0492e+07	6.10368e+07	6.32707e+07	6.85245e+07	6.3491e+07	7.20839e+07	7.31485e+07	6.84516e+07	6.94035e+07	6.84467e+07
Blood group h disaccharide	371.136	241.084	Organic oxygen compounds	Organooxygen compounds	Carbohydrates and carbohydrate conjugates	5.496e+06	5.40751e+06	5.22651e+06	3.19794e+06	3.06688e+06	2.27151e+06	1.86366e+07	1.08477e+07	1.55846e+07	5.29154e+06	5.15688e+06	3.65475e+06	5.62564e+06	5.79865e+06	5.79781e+06
Caffeic acid	179.035	636.009	Phenylpropanoids and polyketides	Cinnamic acids and derivatives	Hydroxycinnamic acids and derivatives	1.60023e+07	1.65856e+07	1.55175e+07	1.52449e+07	1.58423e+07	1.54109e+07	2.49491e+07	2.72597e+07	2.65547e+07	1.44291e+07	1.72695e+07	1.89509e+07	2.08881e+07	2.08963e+07	2.13587e+07
Camelliaside b	725.196	524.772	Phenylpropanoids and polyketides	Flavonoids	Flavonoid glycosides	2.33e+07	2.32213e+07	2.20279e+07	1.4315e+07	1.78717e+07	1.374e+07	1.8001e+07	2.08255e+07	2.04919e+07	1.07691e+07	1.54882e+07	1.69498e+07	2.06968e+07	2.07157e+07	2.11724e+07
Capric acid	171.139	1362.9	Lipids and lipid-like molecules	Fatty Acyls	Fatty acids and conjugates	3.50721e+06	1.71591e+07	7.34256e+06	2.23613e+07	3.87386e+06	1.46001e+07	1.25859e+07	3.27053e+06	4.00127e+06	3.54312e+06	2.3132e+07	4.06858e+06	4.8666e+06	4.32164e+06	4.87996e+06
Caproic acid	115.076	121.998	Lipids and lipid-like molecules	Fatty Acyls	Fatty acids and conjugates	2.79991e+08	2.91656e+08	2.21879e+08	2.41202e+08	2.31811e+08	2.54266e+08	1.71353e+08	1.99963e+08	1.79232e+08	1.65609e+08	1.84339e+08	2.57732e+08	2.57728e+08	2.57818e+08	2.68708e+08
(-)-catechin	187.05	93.4889	Phenylpropanoids and polyketides	Flavonoids	Flavans	6.01286e+06	5.73459e+06	5.61371e+06	7.60776e+06	2.57181e+06	3.78956e+06	6.31045e+06	5.8376e+06	6.64533e+06	5.48128e+06	7.94962e+06	7.25119e+06	4.9402e+06	4.95806e+06	5.27137e+06
(-)-catechin gallate	441.071	814.863	Phenylpropanoids and polyketides	Flavonoids	Flavans	4.34781e+06	3.75757e+06	3.09551e+06	4.24074e+06	5.74218e+06	6.66792e+06	5.26064e+06	6.23347e+06	5.58619e+06	2.42077e+06	5.81836e+06	7.5935e+06	5.89905e+06	6.13969e+06	6.134e+06
Cephalexin	268.102	262.844	Organoheterocyclic compounds	Lactams	Beta lactams	2.10837e+06	3.79388e+06	3.34647e+06	122594	3.28195e+07	3.30664e+07	9.1831e+06	7.72094e+06	7.97275e+06	2.39233e+06	2.47262e+06	3.1818e+06	3.44445e+06	3.06356e+06	3.43724e+06
Cetirizine	387.133	270.427	Benzenoids	Benzene and substituted derivatives	Diphenylmethanes	1.3155e+07	1.38441e+07	1.34076e+07	6.51678e+06	5.77087e+06	1.12725e+07	8.91626e+06	7.0549e+06	1.06892e+07	1.30312e+07	1.07286e+07	1.9308e+07	1.44873e+07	1.4704e+07	1.39088e+07
Chlorogenate	353.089	435.878	Organic oxygen compounds	Organooxygen compounds	Alcohols and polyols	4.28259e+08	4.69881e+08	9.00624e+08	1.32045e+08	3.43406e+08	3.06012e+08	2.10222e+08	8.38837e+08	4.7779e+08	2.78812e+08	3.20442e+08	3.35172e+08	4.40323e+08	4.45096e+08	4.45016e+08
Chlorogenic acid	353.089	470.569	Organic oxygen compounds	Organooxygen compounds	Alcohols and polyols	6.8557e+07	1.58288e+08	1.30084e+08	4.37197e+07	5.74849e+07	1.18599e+08	1.03133e+08	1.12452e+08	1.17168e+08	6.00795e+07	5.82141e+07	1.16751e+08	1.14957e+08	1.28657e+08	1.28432e+08
Chlorohydroquinone	142.998	198.057	Benzenoids	Phenols	1,4-dihydroxy-2-halobenzenoids	1.81599e+09	9.09517e+08	2.3346e+09	1.71076e+09	7.62208e+08	6.6431e+08	1.77501e+09	1.13302e+09	2.52374e+09	1.50629e+09	1.96561e+09	8.07357e+08	1.99084e+09	1.97027e+09	2.16734e+09
Cholesteryl sulfate	465.305	37.4698	Lipids and lipid-like molecules	Steroids and steroid derivatives	Cholestane steroids	2.92383e+06	3.52595e+06	3.17719e+06	3.35272e+06	2.94024e+06	2.63108e+06	5.68442e+06	3.44181e+06	3.46557e+06	1.46449e+06	1.83853e+06	1.78753e+06	3.8393e+06	3.75861e+06	3.83894e+06
Chorismic acid	225.044	38.4873	Organic acids and derivatives	Carboxylic acids and derivatives	Dicarboxylic acids and derivatives	1.66533e+07	1.68036e+07	1.62482e+07	1.99024e+07	1.83701e+07	1.90251e+07	2.60288e+07	2.51243e+07	2.33441e+07	2.00841e+07	2.58619e+07	2.77309e+07	2.40297e+07	2.41286e+07	2.44012e+07
Cinchonine	293.18	37.406				1.93269e+07	2.73949e+07	2.79487e+07	2.89152e+07	2.38194e+07	2.40399e+07	3.56652e+07	2.10868e+07	2.59086e+07	1.24353e+07	1.48274e+07	1.88651e+07	2.62843e+07	2.6282e+07	2.74612e+07
cis-4-Hydroxy-D-proline	130.04	75.434	Organic acids and derivatives	Carboxylic acids and derivatives	Amino acids, peptides, and analogues	945305	1.08024e+06	899219	952257	946506	1.20109e+06	1.13759e+06	1.0879e+06	1.04112e+06	3.12053e+06	942081	974982	1.09353e+06	818409	885954
Cis-9-palmitoleic acid	253.218	57.2054	Lipids and lipid-like molecules	Fatty Acyls	Fatty acids and conjugates	7.25988e+06	9.81735e+06	1.12534e+07	5.68921e+06	5.11427e+06	5.79784e+06	8.4752e+06	4.87105e+06	5.88141e+06	3.32237e+06	2.40545e+06	3.06419e+06	5.726e+06	5.6888e+06	5.72669e+06
Cis-aconitate	173.009	828.753	Organic acids and derivatives	Carboxylic acids and derivatives	Tricarboxylic acids and derivatives	1.61102e+08	1.574e+08	1.51629e+08	1.62385e+08	8.96323e+07	1.19088e+08	1.59015e+08	1.62396e+08	1.55606e+08	1.20432e+08	1.38826e+08	1.55912e+08	1.74897e+08	1.74788e+08	1.80405e+08
Cis,cis-muconic acid	141.016	611.981	Lipids and lipid-like molecules	Fatty Acyls	Fatty acids and conjugates	2.67258e+08	2.52273e+08	2.52142e+08	2.75184e+08	2.65216e+08	2.49362e+08	2.57548e+08	2.61495e+08	2.66989e+08	1.95305e+08	2.35201e+08	2.60389e+08	2.81075e+08	2.81268e+08	2.82346e+08
Citraconic acid	129.018	872.777	Lipids and lipid-like molecules	Fatty Acyls	Fatty acids and conjugates	2.91739e+08	3.3521e+08	3.03509e+08	3.27375e+08	3.71304e+08	2.81507e+08	3.18844e+08	3.92023e+08	3.46399e+08	1.74321e+08	3.16059e+08	3.36505e+08	3.85441e+08	3.74337e+08	3.74495e+08
Citramalate	147.029	694.779	Lipids and lipid-like molecules	Fatty Acyls	Fatty acids and conjugates	1.78505e+08	1.57259e+08	2.05076e+08	2.30251e+08	1.15083e+08	1.57167e+08	1.12315e+08	2.73694e+08	1.48224e+08	2.37491e+08	1.22688e+08	1.35452e+08	1.70058e+08	2.51217e+08	2.46106e+08
Citrinin	249.081	47.0914				5.39375e+06	5.85122e+06	9.71304e+06	7.61001e+06	6.93551e+06	8.34439e+06	7.93997e+06	8.00657e+06	7.44668e+06	1.2129e+07	8.99859e+06	1.56814e+07	8.43329e+06	8.43524e+06	8.93053e+06
Coniferyl aldehyde	177.055	55.3459	Benzenoids	Phenols	Methoxyphenols	1.0137e+07	9.58524e+06	9.71424e+06	9.97246e+06	1.43582e+07	1.0919e+07	1.20737e+07	1.11756e+07	1.2782e+07	7.26898e+06	5.87182e+06	5.7536e+06	8.52916e+06	8.04802e+06	8.04987e+06
Coumaric acid o-glucoside	325.094	596.997	Organic oxygen compounds	Organooxygen compounds	Carbohydrates and carbohydrate conjugates	6.8762e+07	7.28751e+07	7.4185e+07	7.6965e+07	5.21058e+07	5.58817e+07	6.61776e+07	7.38544e+07	7.33746e+07	6.76759e+07	7.11634e+07	6.97149e+07	7.02245e+07	6.71214e+07	6.7144e+07
Coumaroyl hexoside (isomer of 690, 691)	325.094	229.605	Organic oxygen compounds	Organooxygen compounds	Carbohydrates and carbohydrate conjugates	2.13516e+09	2.17703e+09	2.16903e+09	2.50284e+09	2.49096e+09	2.46621e+09	2.53324e+09	2.5005e+09	2.37601e+09	1.93072e+09	2.45782e+09	2.52199e+09	2.52733e+09	2.5301e+09	2.60828e+09
Coumaroyl quinic acid (isomer of 758, 760)	337.094	306.387	Organic oxygen compounds	Organooxygen compounds	Alcohols and polyols	8.59093e+06	8.40547e+06	8.04774e+06	8.2956e+06	1.05912e+07	8.64509e+06	1.32346e+07	1.50229e+07	1.39111e+07	9.61008e+06	1.56876e+07	1.4959e+07	1.48085e+07	1.49534e+07	1.52634e+07
Creatine	130.05	711.997	Organic acids and derivatives	Carboxylic acids and derivatives	Amino acids, peptides, and analogues	7.89657e+07	7.82823e+07	7.35414e+07	7.41745e+07	8.52907e+07	8.15313e+07	1.31514e+08	1.321e+08	1.32039e+08	1.0963e+08	1.55614e+08	1.68384e+08	1.24302e+08	1.30294e+08	1.30272e+08
Curculigoside	283.083	148.976	Organic oxygen compounds	Organooxygen compounds	Carbohydrates and carbohydrate conjugates	1.07646e+08	1.052e+08	1.02264e+08	4.19526e+07	6.3171e+07	6.33644e+07	1.05496e+08	1.11847e+08	1.09792e+08	1.06083e+08	1.25564e+08	8.72165e+07	9.46513e+07	9.4499e+07	8.42728e+07
Curcumin	367.106	530.688	Phenylpropanoids and polyketides	Diarylheptanoids	Linear diarylheptanoids	6.1619e+08	6.72166e+08	5.20005e+08	5.58857e+08	7.29686e+08	3.4391e+08	5.68801e+08	5.98093e+08	5.39622e+08	4.1987e+08	4.59324e+08	3.88133e+08	4.66343e+08	5.51497e+08	4.43207e+08
Cys-Cys	223.028	45.9685	Organic acids and derivatives	Carboxylic acids and derivatives	Amino acids, peptides, and analogues	3.51172e+06	5.07918e+06	3.6355e+06	3.46413e+06	4.2636e+06	2.12168e+06	2.62213e+06	2.56025e+06	2.877e+06	3.47897e+06	3.20601e+06	2.69825e+06	4.44251e+06	4.21656e+06	4.21694e+06
Cytidine	242.079	420.255	"Nucleosides, nucleotides, and analogues"	Pyrimidine nucleosides		1.67518e+08	1.67136e+08	1.59006e+08	1.49611e+08	1.51975e+08	1.52439e+08	2.15385e+08	2.31541e+08	2.22966e+08	1.77721e+08	2.10555e+08	2.15103e+08	2.03318e+08	2.04353e+08	2.06356e+08
Cytidine 3'-monophosphate	322.046	826.865				1.53403e+07	1.57766e+07	1.46195e+07	1.16682e+07	1.30256e+07	1.32592e+07	1.93703e+07	2.07379e+07	1.97737e+07	1.08207e+07	1.44964e+07	1.58049e+07	1.69525e+07	1.70655e+07	1.71825e+07
D-2-aminobutyric acid	102.055	743.356	Organic acids and derivatives	Carboxylic acids and derivatives	Amino acids, peptides, and analogues	7.03618e+08	6.70956e+08	6.34525e+08	5.10229e+08	5.20857e+08	5.54488e+08	1.00922e+09	1.10452e+09	1.03667e+09	6.76219e+08	8.06697e+08	8.08204e+08	8.16635e+08	8.16878e+08	8.29548e+08
D-Allose	180.066	587.935	Organic oxygen compounds	Organooxygen compounds	Carbohydrates and carbohydrate conjugates	9.94712e+06	3.56651e+06	9.07082e+06	1.12647e+07	8.2012e+06	7.57553e+06	7.70443e+06	6.25137e+06	5.35047e+06	5.6866e+06	7.15777e+06	9.09811e+06	6.91712e+06	6.95251e+06	6.16787e+06
D-arabinonic acid	165.04	434.754	Organic oxygen compounds	Organooxygen compounds	Carbohydrates and carbohydrate conjugates	9.33497e+08	1.02747e+09	9.48349e+08	1.02172e+09	1.1461e+09	1.30441e+09	1.40072e+09	1.38563e+09	1.40682e+09	9.7532e+08	1.36896e+09	1.37557e+09	1.29678e+09	1.30096e+09	1.36621e+09
D-Arabinono-1,4-lactone	207.051	116.163				9.1594e+07	8.67456e+07	8.85442e+07	9.23853e+07	9.0097e+07	8.52231e+07	9.35939e+07	8.76901e+07	8.53663e+07	8.91721e+07	9.02733e+07	8.60775e+07	9.29878e+07	9.29875e+07	9.39628e+07
D-arabinose	113.024	455.482	Organic oxygen compounds	Organooxygen compounds	Carbohydrates and carbohydrate conjugates	5.47495e+08	5.0905e+08	7.96089e+08	5.61888e+08	5.11081e+08	4.2273e+08	1.57964e+09	4.6658e+08	1.63964e+09	1.2746e+09	1.54002e+09	6.13329e+08	8.39584e+08	8.42051e+08	1.06393e+09
D-arabitol	133.05	340.05	Organic oxygen compounds	Organooxygen compounds	Carbohydrates and carbohydrate conjugates	4.23421e+07	4.36525e+07	4.0092e+07	4.26184e+07	6.03893e+07	5.03968e+07	4.8938e+07	5.74857e+07	5.32478e+07	3.47798e+07	6.67648e+07	7.01099e+07	6.00998e+07	6.01564e+07	6.14828e+07
D-asparagine	131.045	686.644	Organic acids and derivatives	Carboxylic acids and derivatives	Amino acids, peptides, and analogues	3.35834e+08	3.4218e+08	3.20844e+08	3.38221e+08	3.93254e+08	3.91735e+08	3.0311e+08	3.18294e+08	3.30028e+08	3.01218e+08	4.6683e+08	4.08307e+08	4.02902e+08	4.02979e+08	4.09129e+08
D-aspartic acid	132.029	753.106	Organic acids and derivatives	Carboxylic acids and derivatives	Amino acids, peptides, and analogues	3.38179e+08	3.06392e+08	2.93372e+08	2.18443e+08	2.72617e+08	2.27351e+08	4.10221e+08	4.51187e+08	4.54682e+08	3.24627e+08	3.664e+08	3.81422e+08	3.60591e+08	3.52657e+08	3.52628e+08
Dauricine	417.212	41.1472	Organoheterocyclic compounds	Isoquinolines and derivatives	Benzylisoquinolines	883964	1.20368e+06	776622	979494	1.14808e+06	1.35893e+06	1.53807e+06	1.20017e+06	1.27812e+06	658419	673509	904184	1.56045e+06	1.62945e+06	1.62651e+06
D-(-)-erythrose	101.023	677.523	Organic oxygen compounds	Organooxygen compounds	Carbohydrates and carbohydrate conjugates	7.48424e+07	7.02012e+07	6.57276e+07	6.05948e+07	5.31243e+07	5.93575e+07	7.87541e+07	7.65911e+07	8.48515e+07	5.9205e+07	7.19752e+07	6.95529e+07	6.92413e+07	6.92525e+07	7.02653e+07
Dethiobiotin	213.113	204.568	Lipids and lipid-like molecules	Fatty Acyls	Fatty acids and conjugates	2.64378e+07	3.02759e+07	1.13428e+07	2.56746e+07	2.10492e+06	4.62148e+06	1.35411e+07	2.93405e+07	1.36951e+07	3.25273e+07	2.00747e+07	1.27874e+07	8.06107e+06	9.31803e+06	8.14395e+06
D-fructose 6-phosphate	259.014	428.721	Organic oxygen compounds	Organooxygen compounds	Carbohydrates and carbohydrate conjugates	3.18423e+07	2.96164e+07	2.78301e+07	3.00724e+07	3.39151e+07	2.84922e+07	3.73597e+07	4.3285e+07	3.49544e+07	2.86498e+07	4.8904e+07	4.02672e+07	4.71697e+07	4.72485e+07	4.93081e+07
D-(+)-galactose	215.033	525.669	Organic oxygen compounds	Organooxygen compounds	Carbohydrates and carbohydrate conjugates	3.03917e+08	4.01207e+08	3.03692e+08	2.93439e+08	3.96058e+08	3.97886e+08	3.93472e+08	3.04526e+08	3.33881e+08	3.82054e+08	3.35534e+08	1.13919e+08	3.25116e+08	3.25111e+08	3.50065e+08
D-galacturonic acid	101.023	457.596	Organic oxygen compounds	Organooxygen compounds	Carbohydrates and carbohydrate conjugates	2.02608e+09	2.5992e+09	7.4479e+08	1.82021e+09	5.79377e+08	6.56078e+08	1.9082e+09	2.40701e+09	1.5984e+09	5.70659e+08	8.82513e+08	1.53274e+09	1.75159e+09	1.08501e+09	1.76557e+09
D-glucarate	191.019	420.357	Organic oxygen compounds	Organooxygen compounds	Carbohydrates and carbohydrate conjugates	4.60728e+07	5.29302e+07	5.5013e+07	4.68678e+07	2.20081e+08	4.99525e+07	6.45591e+07	8.05225e+07	6.38758e+07	3.81066e+07	6.02014e+07	6.7475e+07	6.33367e+07	5.86118e+07	6.29643e+07
D-gluconate	195.051	742.408	Organic oxygen compounds	Organooxygen compounds	Carbohydrates and carbohydrate conjugates	4.59975e+07	3.97889e+07	6.83306e+07	5.33995e+07	4.99111e+07	5.24043e+07	3.60593e+07	3.88692e+07	4.09681e+07	4.44853e+07	4.85775e+07	4.57911e+07	6.29729e+07	6.2859e+07	7.15429e+07
D-glucono-1,5-lactone	177.04	648.964	Organic oxygen compounds	Organooxygen compounds	Carbohydrates and carbohydrate conjugates	1.45385e+07	1.57176e+07	1.55263e+07	1.83086e+07	3.70057e+07	2.05577e+07	1.91e+07	1.84861e+07	1.72159e+07	1.7729e+07	1.70316e+07	2.04351e+07	1.82602e+07	1.82638e+07	1.90504e+07
D-Glucuronate	175.025	839.665	Organic oxygen compounds	Organooxygen compounds	Carbohydrates and carbohydrate conjugates	388714	578240	409322	431168	506619	519961	480889	539629	532137	404520	446955	558018	516877	553143	516889
Diffractaic acid	373.119	337.821				1.76528e+07	1.69724e+07	1.53053e+07	1.65551e+07	1.3409e+07	1.48891e+07	2.16209e+07	2.29314e+07	2.30975e+07	1.999e+07	2.20792e+07	2.39894e+07	2.10865e+07	2.08469e+07	2.10818e+07
Dihydro-4,4-dimethyl-2,3-furandione	127.039	569.292	Organoheterocyclic compounds	Lactones	Gamma butyrolactones	3.21437e+06	1.05256e+07	1.08805e+07	9.15103e+06	5.99582e+06	1.27192e+06	9.70995e+06	6.03427e+06	3.40162e+06	1.44297e+06	4.79089e+06	2.59056e+06	7.87602e+06	8.468e+06	9.7845e+06
Dihydrokaempferol	287.092	331.049	Phenylpropanoids and polyketides	Flavonoids	Flavans	250552	231328	243141	200165	1.21316e+06	1.14624e+06	560670	2.11764e+06	319402	851200	788415	1.11451e+06	1.10103e+06	830609	896311
Dihydrouracil	113.06	163.108	Organoheterocyclic compounds	Diazines	Pyrimidines and pyrimidine derivatives	5.25801e+06	1.48628e+07	4.82947e+06	1.6427e+07	1.41883e+07	1.4121e+07	9.76867e+06	8.79884e+06	2.77057e+06	9.58234e+06	1.44334e+07	1.4012e+07	6.09281e+06	8.05922e+06	6.08123e+06
Dihydroxyacetone	89.0231	455.657	Organic oxygen compounds	Organooxygen compounds	Carbohydrates and carbohydrate conjugates	2.80753e+09	1.43769e+09	1.52318e+09	1.3977e+09	2.92943e+09	1.3896e+09	1.26974e+09	1.48748e+09	1.45768e+09	1.42108e+09	1.54907e+09	1.54309e+09	1.56495e+09	1.56471e+09	1.54196e+09
Dihydroxyfumaric acid	103.002	747.551	Lipids and lipid-like molecules	Fatty Acyls	Fatty acids and conjugates	3.32839e+06	3.96032e+06	3.26807e+06	2.64815e+06	2.4033e+06	2.3739e+06	5.06588e+06	6.05043e+06	5.31569e+06	4.01727e+06	3.66232e+06	4.14722e+06	4.66238e+06	4.41145e+06	4.41469e+06
Dl-3-aminoisobutyric acid	102.055	607.556	Organic acids and derivatives	Carboxylic acids and derivatives	Amino acids, peptides, and analogues	2.82459e+06	3.13698e+06	3.00498e+06	3.05406e+06	2.95825e+06	3.16966e+06	4.58914e+06	2.9989e+06	2.71831e+06	2.75962e+06	3.10359e+06	3.61754e+06	2.97183e+06	2.97302e+06	3.05533e+06
DL-histidine	154.061	800	Organic acids and derivatives	Carboxylic acids and derivatives	Amino acids, peptides, and analogues	3.30682e+06	3.4916e+06	3.32741e+06	2.28216e+06	4.35275e+06	1.42905e+06	3.21778e+06	3.67386e+06	3.3449e+06	2.85794e+06	3.47392e+06	3.88963e+06	3.68335e+06	3.68353e+06	3.70929e+06
DL-phenylalanine	164.071	487.337	Organic acids and derivatives	Carboxylic acids and derivatives	Amino acids, peptides, and analogues	2.35908e+08	2.22773e+08	2.59475e+08	2.45987e+08	2.16814e+08	2.39821e+08	1.87092e+08	2.52329e+08	5.22465e+08	2.3102e+08	3.31141e+08	2.18096e+08	2.15249e+08	1.95146e+08	2.14827e+08
DL-serine	104.034	685.492	Organic acids and derivatives	Carboxylic acids and derivatives	Amino acids, peptides, and analogues	6.80038e+07	6.76326e+07	6.70031e+07	7.86931e+07	7.58818e+07	8.69449e+07	4.69583e+07	4.85532e+07	4.77932e+07	5.58178e+07	7.1121e+07	7.45595e+07	7.28279e+07	7.57724e+07	7.57748e+07
DL-threonine	118.05	635.779	Organic acids and derivatives	Carboxylic acids and derivatives	Amino acids, peptides, and analogues	8.03781e+07	7.51988e+07	7.76883e+07	8.74172e+07	1.22163e+08	9.56582e+07	7.12025e+07	7.62999e+07	1.16753e+08	8.34638e+07	9.65763e+07	1.13555e+08	9.27226e+07	9.28718e+07	9.90277e+07
DL-tryptophan	203.082	463.861	Organic acids and derivatives	Carboxylic acids and derivatives	Amino acids, peptides, and analogues	8.05278e+07	8.01762e+07	7.50633e+07	9.96885e+07	8.60153e+07	9.67634e+07	8.91748e+07	9.8088e+07	9.27616e+07	7.73297e+07	9.72507e+07	1.03365e+08	9.41684e+07	9.45812e+07	9.56738e+07
D-lyxose	149.045	577.163	Organic oxygen compounds	Organooxygen compounds	Carbohydrates and carbohydrate conjugates	5.28568e+07	4.86742e+07	4.61207e+07	4.41432e+07	4.62816e+07	4.48206e+07	6.11365e+07	6.36803e+07	5.8916e+07	5.06811e+07	1.39468e+08	6.72568e+07	5.92541e+07	5.66242e+07	5.92458e+07
D-Maltose	341.088	442.448	Lipids and lipid-like molecules	Fatty Acyls	Fatty acyl glycosides	1.92532e+07	1.0461e+07	4.05714e+06	1.02606e+07	1.43947e+07	3.03648e+07	3.53609e+07	4.09899e+07	3.31201e+07	1.12538e+07	5.04576e+07	5.42797e+07	3.32066e+07	3.69328e+07	3.35486e+07
D-mannitol	181.071	542.342	Organic oxygen compounds	Organooxygen compounds	Carbohydrates and carbohydrate conjugates	1.90805e+07	1.60976e+07	1.58061e+07	1.56126e+07	2.07294e+07	1.81078e+07	1.40118e+07	1.61107e+07	1.40279e+07	1.25788e+07	2.24858e+07	2.00538e+07	2.00773e+07	2.07062e+07	2.07043e+07
D-(+)-Mannose	239.078	712.972	Organic oxygen compounds	Organooxygen compounds	Carbohydrates and carbohydrate conjugates	1.04144e+08	1.04026e+08	9.50733e+07	8.64556e+07	1.00327e+08	9.451e+07	1.10742e+08	1.10718e+08	1.12922e+08	9.98123e+07	1.16041e+08	1.22623e+08	1.14593e+08	1.146e+08	1.16025e+08
D-Mannose 1-phosphate	296.984	877.585	Organic oxygen compounds	Organooxygen compounds	Carbohydrates and carbohydrate conjugates	3.17469e+07	1.41993e+07	2.24861e+07	2.31893e+07	2.53197e+07	1.92845e+07	2.97549e+07	3.10626e+07	3.12957e+07	1.47988e+07	2.99031e+07	1.79275e+07	2.84678e+07	3.9797e+07	3.56552e+07
D-mannose 6-phosphate	259.023	904.212	Organic oxygen compounds	Organooxygen compounds	Carbohydrates and carbohydrate conjugates	8.55029e+07	8.95716e+07	8.41079e+07	9.27521e+07	1.07335e+08	1.08984e+08	1.02509e+08	1.14931e+08	1.08492e+08	7.57012e+07	1.03472e+08	1.13029e+08	1.09484e+08	1.095e+08	1.11917e+08
Dodecanedioic acid	211.134	96.7409	Lipids and lipid-like molecules	Fatty Acyls	Fatty acids and conjugates	6.8122e+06	6.7252e+06	5.40415e+06	4.76181e+06	5.83023e+06	3.75e+06	9.99341e+06	8.38226e+06	1.05549e+07	8.6438e+06	7.59894e+06	8.32506e+06	7.64657e+06	7.6509e+06	7.54259e+06
Dodecanoic acid	199.17	79.0147	Lipids and lipid-like molecules	Fatty Acyls	Fatty acids and conjugates	9.55345e+06	8.91353e+06	9.02895e+06	4.38627e+06	8.53604e+06	4.74244e+06	1.55454e+07	9.25496e+06	1.11773e+07	5.05669e+06	5.72534e+06	4.73063e+06	8.63496e+06	7.58956e+06	8.61123e+06
Doxorubicin	395.065	750.765				1.10675e+07	1.01021e+07	1.11486e+07	1.4534e+06	3.66161e+06	1.53434e+06	5.21651e+07	4.07191e+07	3.95273e+07	8.29928e+06	1.20171e+07	1.59089e+07	1.46896e+07	1.44262e+07	1.46906e+07
D-proline	114.055	559.938	Organic acids and derivatives	Carboxylic acids and derivatives	"Amino acids, peptides, and analogues"	7.20579e+07	7.53306e+07	6.97387e+07	6.03122e+07	3.08191e+07	6.19602e+07	1.14245e+08	6.44521e+07	6.70286e+07	6.39746e+07	7.05397e+07	1.32659e+08	5.59924e+07	5.60241e+07	5.68887e+07
D-ribose	149.045	465.726	Organic oxygen compounds	Organooxygen compounds	Carbohydrates and carbohydrate conjugates	1.34583e+08	1.27014e+08	1.25337e+08	1.32505e+08	1.17635e+08	1.3938e+08	1.45867e+08	4.60017e+08	1.20566e+08	8.24422e+07	4.36205e+08	4.80955e+08	1.21695e+08	1.1372e+08	1.12485e+08
D-ribose 1-phosphate	229.012	857.787	Organic oxygen compounds	Organooxygen compounds	Carbohydrates and carbohydrate conjugates	3.39185e+06	2.78891e+06	8.97843e+06	2.21572e+06	2.57303e+06	2.92702e+06	3.80656e+06	4.75521e+06	7.42578e+06	2.41528e+06	4.88637e+06	4.91619e+06	4.87392e+06	4.99029e+06	5.39618e+06
D-ribose 5-phosphate	229.003	162.802	Organic oxygen compounds	Organooxygen compounds	Carbohydrates and carbohydrate conjugates	1.2104e+07	1.43019e+07	9.66211e+06	1.15581e+07	1.11295e+07	1.05681e+07	1.36757e+07	1.35695e+07	1.45925e+07	1.12708e+07	1.34823e+07	1.89715e+07	1.44326e+07	1.44262e+07	1.50879e+07
D-ribulose 5-phosphate	229.012	829.057	Organic oxygen compounds	Organooxygen compounds	Carbohydrates and carbohydrate conjugates	3.60824e+06	2.36366e+06	2.10779e+06	3.56638e+06	2.68119e+06	2.76339e+06	2.80213e+06	2.91186e+06	2.65003e+06	1.59245e+06	3.95037e+06	2.6599e+06	2.56146e+06	2.93901e+06	2.93813e+06
D-turanose	161.045	456.657	Lipids and lipid-like molecules	Fatty Acyls	Fatty acyl glycosides	1.93922e+09	1.86229e+09	8.83893e+08	1.62892e+09	9.40206e+08	1.08925e+09	7.52766e+08	7.32397e+08	7.99929e+08	7.31305e+08	8.42324e+08	7.34905e+08	1.00077e+09	9.98111e+08	1.03556e+09
(e)-n-[2-hydroxy-2-(4-hydroxyphenyl)ethyl]-3-(4-hydroxy-3-methoxyphenyl)prop-2-enamide	328.12	88.7766	Phenylpropanoids and polyketides	Cinnamic acids and derivatives	Hydroxycinnamic acids and derivatives	1.32641e+08	1.31529e+08	1.05729e+08	1.54461e+08	3.26985e+08	1.87279e+08	1.42627e+08	1.38729e+08	1.58371e+08	1.47891e+08	1.40773e+08	1.37244e+08	1.44043e+08	1.494e+08	1.4403e+08
Eplerenone hydroxy acid	337.206	37.4002				3.68128e+06	4.71488e+06	4.52956e+06	4.74669e+06	4.78454e+06	3.80777e+06	5.95949e+06	3.7302e+06	4.42533e+06	2.24454e+06	2.76452e+06	2.58844e+06	4.96954e+06	5.08396e+06	5.08002e+06
Ethyl sulfate	124.987	198.051	Organic acids and derivatives	Organic sulfuric acids and derivatives	Sulfuric acid esters	2.04997e+08	1.82923e+08	1.94619e+08	1.60668e+08	1.82225e+08	5.93296e+07	1.83373e+08	2.21126e+08	6.11104e+07	1.28214e+08	6.22458e+07	6.91246e+07	1.66074e+08	1.4336e+08	1.65907e+08
Etodolac	242.177	50.282	Organoheterocyclic compounds	Indoles and derivatives	Indolyl carboxylic acids and derivatives	4.49264e+07	2.10897e+07	1.45861e+07	2.30542e+07	2.53231e+07	4.20419e+07	3.53696e+06	1.25281e+07	1.71586e+07	7.58651e+06	2.12596e+07	1.10286e+07	2.84578e+07	2.84726e+07	2.53813e+07
Fa 13:3+1o	223.134	95.9646	Lipids and lipid-like molecules	Fatty Acyls	Fatty acids and conjugates	1.77584e+07	1.80049e+07	1.48112e+07	1.01399e+07	8.57487e+06	8.1907e+06	4.5861e+07	3.352e+07	5.14974e+07	3.12106e+07	1.7788e+07	2.13956e+07	2.27058e+07	2.27062e+07	2.21726e+07
Fa 18:2+2o	311.224	98.8396	Lipids and lipid-like molecules	Fatty Acyls	Lineolic acids and derivatives	2.61926e+08	1.61809e+08	1.4278e+08	2.65891e+08	1.5011e+08	1.24472e+08	1.98791e+08	1.36699e+08	2.10677e+08	1.9302e+08	1.38252e+08	1.55471e+08	1.65323e+08	1.65378e+08	1.63456e+08
Fa 18:2+3o	327.219	92.6302	Lipids and lipid-like molecules	Fatty Acyls	Lineolic acids and derivatives	2.40462e+07	2.38981e+07	1.94459e+07	1.94919e+07	2.11659e+07	1.99053e+07	3.27658e+07	5.32777e+07	3.45027e+07	2.29256e+07	2.58011e+07	2.62087e+07	3.16019e+07	2.99638e+07	2.99656e+07
Fa 18:5+2o	305.177	95.5857	Lipids and lipid-like molecules	Fatty Acyls	Lineolic acids and derivatives	5.32407e+06	5.66525e+06	5.3591e+06	4.8491e+06	4.41858e+06	3.88645e+06	5.60669e+06	5.26385e+06	5.28383e+06	4.64183e+06	5.0465e+06	4.75964e+06	5.69852e+06	5.47364e+06	5.47123e+06
Ferulic acid	193.051	322.78				3.26714e+06	1.82768e+06	1.43838e+06	1.62453e+06	1.41882e+06	1.87226e+06	2.48659e+06	3.35716e+06	4.11853e+06	3.57522e+06	3.73374e+06	2.24997e+06	2.835e+06	2.8185e+06	3.09851e+06
Flavin mononucleotide (fmn)	455.087	809.375	"Nucleosides, nucleotides, and analogues"	Flavin nucleotides		5.46912e+06	7.24481e+06	7.95392e+06	1.2798e+07	3.04244e+07	3.16766e+07	1.19945e+07	1.79514e+07	1.4395e+07	9.75416e+06	2.27676e+07	2.88675e+07	1.99273e+07	2.14872e+07	2.14482e+07
Forskolin	409.21	259.279	Lipids and lipid-like molecules	Prenol lipids	Triterpenoids	1.38e+07	1.30239e+07	1.31119e+07	7.65517e+06	9.30051e+06	7.74654e+06	1.15813e+07	1.79041e+07	1.31987e+07	1.82646e+07	1.44428e+07	1.67415e+07	1.28031e+07	1.38789e+07	1.28399e+07
Fumarate	115.003	755.982	Organic acids and derivatives	Carboxylic acids and derivatives	Dicarboxylic acids and derivatives	4.77654e+08	4.94943e+08	4.39801e+08	5.28632e+08	5.39495e+08	5.56522e+08	3.80881e+08	4.0851e+08	3.91706e+08	3.70304e+08	4.0369e+08	4.52588e+08	5.24301e+08	5.06648e+08	5.23939e+08
Galactinol	341.111	855.947	Organic oxygen compounds	Organooxygen compounds	Carbohydrates and carbohydrate conjugates	9.2418e+06	8.6405e+06	8.78047e+06	8.87406e+06	1.00544e+07	9.95674e+06	8.48262e+06	9.13139e+06	8.70436e+06	6.70001e+06	9.23105e+06	9.76697e+06	1.0088e+07	1.00944e+07	1.05337e+07
Galactose	179.056	431.884	Organic oxygen compounds	Organooxygen compounds	Carbohydrates and carbohydrate conjugates	6.44864e+08	8.91632e+08	2.60627e+08	2.80786e+08	5.88851e+08	2.55722e+08	1.90681e+08	4.67229e+08	2.90369e+08	5.36474e+08	8.5254e+08	2.71741e+08	2.86617e+08	4.44998e+08	2.93322e+08
.gamma.-hydroxybutyric acid	103.039	430.524	Lipids and lipid-like molecules	Fatty Acyls	Fatty acids and conjugates	6.37779e+06	6.76856e+06	4.96934e+06	1.07961e+07	1.24579e+07	1.1158e+07	7.44472e+06	7.8351e+06	1.8087e+06	2.07896e+06	2.50451e+06	8.85176e+06	6.10213e+06	6.09438e+06	6.31235e+06
Gentiopicroside	401.131	733.454	Organic oxygen compounds	Organooxygen compounds	Carbohydrates and carbohydrate conjugates	1.2234e+07	1.20807e+07	1.14321e+07	1.1002e+07	1.11689e+07	1.13992e+07	1.19087e+07	1.36116e+07	1.29458e+07	1.03935e+07	1.31359e+07	1.32777e+07	1.3432e+07	1.34333e+07	1.36873e+07
Gentisic acid	153.022	43.749	Benzenoids	Benzene and substituted derivatives	Benzoic acids and derivatives	4.46344e+07	4.19442e+07	3.74036e+07	4.89427e+07	8.90334e+07	6.04511e+07	4.16553e+07	8.80371e+07	9.64192e+07	4.42625e+07	6.15286e+07	5.72079e+07	7.79402e+07	7.78514e+07	7.29323e+07
Gitoxigenin diacetate	473.241	378.063	Lipids and lipid-like molecules	Steroids and steroid derivatives	Steroid lactones	259534	256146	199321	321047	444266	184220	1.49771e+06	1.76333e+06	1.60583e+06	1.88047e+06	2.49367e+06	2.6834e+06	1.29419e+06	1.32534e+06	1.33911e+06
Gln-leu	258.147	523.607	Organic acids and derivatives	Carboxylic acids and derivatives	Amino acids, peptides, and analogues	2.49694e+07	2.39584e+07	2.44202e+07	2.50914e+07	2.41833e+07	1.99585e+07	2.15797e+07	1.80026e+07	2.07937e+07	1.97431e+07	2.50381e+07	2.85106e+07	2.54848e+07	2.54987e+07	2.49558e+07
Glucoheptonic acid	207.051	564.207	Organic oxygen compounds	Organooxygen compounds	Carbohydrates and carbohydrate conjugates	3.46273e+06	3.60973e+06	3.52959e+06	3.23861e+06	3.28867e+06	2.91302e+06	4.01499e+06	3.88112e+06	3.87411e+06	2.92357e+06	9.1425e+06	4.05654e+06	3.65765e+06	3.56181e+06	3.65713e+06
Glucose 1-phosphate	259.023	865.315	Organic oxygen compounds	Organooxygen compounds	Carbohydrates and carbohydrate conjugates	1.65186e+08	1.64491e+08	1.55561e+08	1.47088e+08	1.65859e+08	1.63886e+08	2.00852e+08	2.01504e+08	2.03086e+08	1.56383e+08	2.06009e+08	2.20864e+08	1.89896e+08	1.92884e+08	1.92888e+08
Glucose-1-phosphate	259.023	933.103	Organic oxygen compounds	Organooxygen compounds	Carbohydrates and carbohydrate conjugates	2.278e+07	2.24839e+07	2.11333e+07	1.9372e+07	3.87895e+07	3.47722e+07	2.33119e+07	2.75867e+07	2.5888e+07	1.49547e+07	2.56033e+07	3.20656e+07	2.98791e+07	2.9884e+07	3.0193e+07
Glufosinate	119.016	1198.02	Organic acids and derivatives	Carboxylic acids and derivatives	Amino acids, peptides, and analogues	1.28021e+08	1.13477e+08	1.18784e+08	1.17361e+08	1.29326e+08	1.14378e+08	1.24032e+08	1.22152e+08	1.19786e+08	1.23043e+08	1.46048e+08	1.17488e+08	1.18724e+08	1.17672e+08	1.18836e+08
Glutamic acid	146.045	743.417	Organic acids and derivatives	Carboxylic acids and derivatives	Amino acids, peptides, and analogues	4.23986e+09	4.15914e+09	3.88434e+09	3.02146e+09	3.22741e+09	3.2706e+09	6.08262e+09	6.59657e+09	6.33325e+09	3.99425e+09	5.14118e+09	5.09865e+09	5.04858e+09	5.07601e+09	5.10063e+09
Glutaric acid	113.035	686.634	Organic acids and derivatives	Carboxylic acids and derivatives	Dicarboxylic acids and derivatives	8.21579e+07	8.7131e+07	8.43721e+07	8.63724e+07	1.02042e+08	1.02513e+08	7.68534e+07	8.03655e+07	8.43941e+07	7.50027e+07	1.01946e+08	1.05254e+08	1.0359e+08	1.03598e+08	1.04579e+08
Glyceraldehyde	89.0233	154.6	Organic oxygen compounds	Organooxygen compounds	Carbohydrates and carbohydrate conjugates	5.96546e+07	5.52899e+07	5.70259e+07	5.21675e+07	4.7259e+07	3.94738e+07	1.50378e+08	4.46946e+07	6.1599e+07	1.9254e+08	3.38456e+07	5.23359e+07	3.68818e+07	4.13648e+07	3.69097e+07
Glyceraldehyde, 3-(dihydrogen phosphate)	168.981	718.345	Organic oxygen compounds	Organooxygen compounds	Carbohydrates and carbohydrate conjugates	1.41955e+06	1.54039e+06	1.4117e+06	1.48913e+06	1.71082e+06	2.02285e+06	2.10701e+06	2.07457e+06	2.06746e+06	1.20108e+06	2.07533e+06	2.04437e+06	1.97948e+06	2.24065e+06	2.23818e+06
Glyceraldehyde 3-phosphate	168.99	820.078	Organic oxygen compounds	Organooxygen compounds	Carbohydrates and carbohydrate conjugates	2.18369e+06	2.26897e+06	2.18226e+06	2.43072e+06	2.37163e+06	2.45819e+06	1.61353e+06	1.7607e+06	1.52411e+06	1.81461e+06	2.16293e+06	2.43201e+06	2.57498e+06	2.57525e+06	2.60192e+06
Glycerate	105.018	685.554	Organic oxygen compounds	Organooxygen compounds	Carbohydrates and carbohydrate conjugates	1.0328e+07	1.11022e+07	1.07516e+07	8.68527e+06	1.18423e+07	1.11916e+07	1.11501e+07	1.07287e+07	1.33834e+07	9.75703e+06	1.10428e+07	1.22941e+07	1.06538e+07	1.09969e+07	1.09998e+07
Glyceric acid	105.018	544.169	Organic oxygen compounds	Organooxygen compounds	Carbohydrates and carbohydrate conjugates	2.67992e+07	2.66128e+07	2.57724e+07	2.61985e+07	2.93671e+07	2.70061e+07	3.4604e+07	3.38684e+07	3.16184e+07	2.47138e+07	3.40944e+07	3.70122e+07	3.19931e+07	3.20032e+07	2.95265e+07
Glycine	74.0233	681.58	Organic acids and derivatives	Carboxylic acids and derivatives	Amino acids, peptides, and analogues	8.35884e+06	1.04528e+07	9.93496e+06	1.02843e+07	1.00387e+07	1.31498e+07	1.31733e+07	7.98625e+06	6.42745e+06	1.72958e+07	1.12811e+07	1.17149e+07	1.09179e+07	1.07264e+07	1.09132e+07
Glycolate	75.0074	115.717	Organic acids and derivatives	Hydroxy acids and derivatives	Alpha hydroxy acids and derivatives	1.64043e+08	1.65736e+08	1.83102e+08	1.68435e+08	1.72539e+08	1.73493e+08	1.58202e+08	1.67659e+08	1.63111e+08	1.66091e+08	1.75195e+08	1.72023e+08	1.82983e+08	1.82998e+08	1.81573e+08
Gly-His-Lys	339.201	40.5737	Organic acids and derivatives	Carboxylic acids and derivatives	Amino acids, peptides, and analogues	5.07153e+07	5.23096e+07	2.2e+07	2.60774e+07	2.40497e+07	2.83909e+07	4.68644e+07	2.70868e+07	3.63461e+07	1.72554e+07	1.90271e+07	1.72575e+07	3.81217e+07	3.82831e+07	3.89338e+07
Gly-Leu	187.109	507.971	Organic acids and derivatives	Carboxylic acids and derivatives	Amino acids, peptides, and analogues	525427	4.05409e+06	3.96591e+06	480753	3.97426e+06	3.37383e+06	4.18507e+06	4.10301e+06	4.28611e+06	2.93959e+06	4.04874e+06	5.02962e+06	4.62435e+06	4.24982e+06	4.6242e+06
Gly-Phe	221.093	468.82	Organic acids and derivatives	Carboxylic acids and derivatives	Amino acids, peptides, and analogues	2.56107e+06	2.75866e+06	2.5962e+06	2.35451e+06	2.15849e+06	2.09859e+06	1.31629e+07	1.25685e+07	2.5425e+06	1.87298e+06	9.91573e+06	1.28491e+07	7.86255e+06	5.83898e+06	5.92717e+06
Guanidinoethyl sulfonate	124.007	123.5	Organic acids and derivatives	Organic sulfonic acids and derivatives	Organosulfonic acids and derivatives	4.67096e+06	6.09338e+06	4.98508e+06	5.41393e+06	6.31255e+06	7.11463e+06	9.48806e+06	9.19565e+06	9.70542e+06	5.9069e+06	8.28522e+06	8.94075e+06	7.47992e+06	7.7576e+06	7.75472e+06
Guanidinopropionic acid	130.05	423.658	Organic nitrogen compounds	Organonitrogen compounds	Guanidines	7.52605e+06	8.27216e+06	7.15354e+06	7.77008e+06	9.47864e+06	1.0966e+07	1.17211e+07	1.33387e+07	1.2934e+07	7.52063e+06	1.31725e+07	1.33391e+07	1.25274e+07	1.26016e+07	1.36106e+07
Guanosine	282.084	532.63	"Nucleosides, nucleotides, and analogues"	Purine nucleosides		7.94693e+06	7.88915e+06	8.29111e+06	8.39096e+06	1.21168e+07	1.00296e+07	8.95993e+06	9.06136e+06	8.3651e+06	5.5134e+06	9.14844e+06	8.72723e+06	2.03021e+06	2.3531e+06	1.96971e+06
Guanosine 5'-diphospho-.beta.-l-fucose	362.052	840.987	Nucleosides, nucleotides, and analogues	Purine nucleotides	Purine nucleotide sugars	1.15429e+07	1.18991e+07	1.11465e+07	8.59325e+06	9.69097e+06	9.46205e+06	1.47093e+07	1.65208e+07	1.515e+07	7.72904e+06	1.08818e+07	1.19319e+07	1.26299e+07	1.264e+07	1.28552e+07
Guanosine 5'-monophosphate (GMP)	362.054	764.351	Lipids and lipid-like molecules	Fatty Acyls	Eicosanoids	950033	1.18217e+06	1.01126e+06	977293	816710	1.03915e+06	1.44601e+06	1.48019e+06	1.51798e+06	1.06993e+06	1.4927e+06	1.59358e+06	1.64523e+06	1.65068e+06	1.71196e+06
Heptadecanoic acid	269.249	75.4711	Lipids and lipid-like molecules	Fatty Acyls	Fatty acids and conjugates	8.27607e+06	8.08521e+06	7.60506e+06	7.8846e+06	7.68686e+06	7.6817e+06	1.13827e+07	1.01377e+07	1.06952e+07	8.27318e+06	9.05146e+06	7.2685e+06	8.16616e+06	8.17939e+06	7.12922e+06
Hexadecanedioic acid	285.208	127.736	Lipids and lipid-like molecules	Fatty Acyls	Fatty acids and conjugates	1.47834e+07	2.6895e+07	8.56903e+06	7.73982e+06	9.10068e+06	1.09765e+07	5.57051e+06	4.60057e+06	7.75886e+06	5.71462e+06	1.67419e+07	1.63901e+07	1.05275e+07	8.29984e+06	1.05447e+07
Hirsuteine	365.183	530.675				2.70004e+07	2.82842e+07	2.59556e+07	2.33551e+07	2.5763e+07	2.04177e+07	5.00749e+07	5.58608e+07	2.90845e+07	2.28562e+07	2.82144e+07	2.91771e+07	2.51617e+07	2.5466e+07	2.51622e+07
His-Cys	257.078	236.688				3.08262e+07	2.93247e+07	2.98486e+07	3.06889e+07	2.92884e+07	2.90988e+07	3.62101e+07	3.75378e+07	3.55845e+07	3.35866e+07	3.71808e+07	4.01055e+07	3.55381e+07	3.70783e+07	3.70603e+07
His-Gln	282.114	274.361	Organic acids and derivatives	Carboxylic acids and derivatives	Amino acids, peptides, and analogues	6.90282e+06	6.62852e+06	8.70076e+06	1.07936e+07	1.36649e+07	1.05068e+07	1.38223e+07	1.4054e+07	1.41715e+07	9.90677e+06	1.1985e+07	1.43145e+07	1.19576e+07	1.21107e+07	1.19544e+07
His-Lys	282.085	468.264				2.08597e+08	2.14353e+08	2.03117e+08	1.86637e+08	1.88329e+08	2.04603e+08	2.80505e+08	3.06384e+08	2.79298e+08	2.1486e+08	2.75697e+08	2.90448e+08	2.8075e+08	2.80955e+08	2.87223e+08
Homocitrate	205.035	430.854	Organic acids and derivatives	Carboxylic acids and derivatives	Tricarboxylic acids and derivatives	1.433e+09	1.40821e+09	1.28651e+09	1.33526e+09	1.34372e+09	1.40561e+09	1.73659e+09	1.7837e+09	1.74564e+09	1.1549e+09	1.6342e+09	1.81465e+09	1.74161e+09	1.74273e+09	1.79454e+09
Homovanillic acid sulfate	261.008	450.741	Organic acids and derivatives	Organic sulfuric acids and derivatives	Arylsulfates	9.38718e+06	9.03541e+06	9.96428e+06	7.50487e+06	8.34756e+06	7.83403e+06	9.13659e+06	1.12754e+07	1.12537e+07	9.84524e+06	1.10902e+07	1.38488e+07	1.15617e+07	1.14088e+07	1.156e+07
Hydrocinnamic acid	149.045	677.51				3.87924e+06	3.23848e+06	4.03437e+06	3.63272e+06	3.81581e+06	3.30366e+06	3.54826e+06	4.04959e+06	4.40719e+06	3.98364e+06	4.43782e+06	5.86458e+06	4.36996e+06	4.00046e+06	4.01215e+06
Hydroferulic acid	195.066	244.005				4.91218e+07	3.76829e+07	5.60298e+07	5.61387e+07	4.35867e+07	5.17301e+07	4.28447e+07	5.28784e+07	3.79542e+07	5.79029e+07	3.73832e+07	8.12654e+07	4.77211e+07	4.63432e+07	4.5707e+07
Hydroquinidine	325.185	41.4705				6.37713e+07	6.30383e+07	2.92918e+07	3.42906e+07	3.25989e+07	3.83543e+07	6.39345e+07	3.61445e+07	4.9948e+07	2.56525e+07	2.70454e+07	2.34577e+07	5.05807e+07	5.12524e+07	5.14446e+07
(-)-hydroxycitric acid lactone	189.004	688.711	Organic acids and derivatives	Carboxylic acids and derivatives	Tricarboxylic acids and derivatives	1.76498e+07	1.8687e+07	1.62945e+07	1.80606e+07	2.21853e+07	2.2219e+07	2.36881e+07	2.40227e+07	2.33927e+07	1.61925e+07	2.3523e+07	2.3501e+07	2.38708e+07	2.39115e+07	2.50777e+07
Hydroxypyruvic acid dimethyl ketal phosphate	196.984	54.5287	Organic oxygen compounds	Organooxygen compounds	Ethers	9.80948e+06	5.5887e+06	7.77241e+06	6.74618e+06	6.51575e+06	7.59398e+06	8.31542e+06	6.70477e+06	5.04146e+06	1.14234e+07	3.79279e+06	9.24217e+06	8.4756e+06	9.09133e+06	9.09133e+06
Hydroxysuberic acid	189.076	430.852	Organic acids and derivatives	Hydroxy acids and derivatives	Medium-chain hydroxy acids and derivatives	9.23862e+06	8.92129e+06	8.85457e+06	7.18592e+06	9.06365e+06	7.71512e+06	1.70538e+07	2.00266e+07	1.70874e+07	1.33575e+07	1.68507e+07	1.86048e+07	1.60115e+07	1.60363e+07	1.65216e+07
Idarubicin	349.06	362.325				3.25683e+06	4.64043e+06	3.34658e+06	7.70645e+06	1.21101e+06	2.77739e+06	5.91086e+06	5.79886e+06	6.12499e+06	3.37489e+06	4.85669e+06	4.00188e+06	5.24265e+06	4.62982e+06	5.24352e+06
Ile-Asn	244.131	526.056	Organic acids and derivatives	Carboxylic acids and derivatives	Amino acids, peptides, and analogues	3.09564e+07	3.06033e+07	3.19277e+07	2.84747e+07	3.34584e+07	2.76197e+07	2.50417e+07	2.40615e+07	2.91984e+07	2.20762e+07	2.42199e+07	2.63338e+07	3.33329e+07	3.33244e+07	3.45343e+07
Ile-Asp	245.115	675.391	Organic acids and derivatives	Carboxylic acids and derivatives	Amino acids, peptides, and analogues	2.01272e+07	1.86298e+07	1.8227e+07	1.28951e+07	1.58796e+07	1.28296e+07	1.60597e+07	1.5984e+07	1.92656e+07	1.29764e+07	1.64044e+07	1.90676e+07	2.05141e+07	1.96565e+07	2.05065e+07
Ile-Met	261.129	318.998	Organic acids and derivatives	Carboxylic acids and derivatives	Amino acids, peptides, and analogues	1.2862e+07	1.10082e+07	1.04251e+07	7.0101e+06	1.02095e+07	8.47742e+06	8.70974e+06	8.60059e+06	1.02151e+07	7.01305e+06	7.76173e+06	9.08144e+06	1.04103e+07	1.02652e+07	1.02655e+07
Ile-Phe	277.156	294.182	Organic acids and derivatives	Carboxylic acids and derivatives	Amino acids, peptides, and analogues	7.40512e+07	7.38705e+07	7.51762e+07	5.98074e+07	6.12225e+07	5.00042e+07	5.8875e+07	5.96462e+07	6.7198e+07	5.34381e+07	5.78583e+07	6.46799e+07	6.67703e+07	6.87196e+07	6.87218e+07
Ile-thr	231.078	453.47	Organoheterocyclic compounds	Diazanaphthalenes	Naphthyridines	2.70016e+06	1.96232e+06	2.75883e+06	1.04347e+06	1.51249e+06	2.56797e+06	4.11756e+06	5.23761e+06	4.05069e+06	3.69962e+06	3.24771e+06	3.77509e+06	3.71251e+06	3.58865e+06	3.65184e+06
Ile-Tyr	293.151	361.727	Organic acids and derivatives	Carboxylic acids and derivatives	Amino acids, peptides, and analogues	2.02983e+06	2.03255e+06	1.81328e+06	1.51032e+06	1.54789e+06	1.42697e+06	1.46024e+06	1.64904e+06	1.52545e+06	1.14632e+06	1.3898e+06	1.98493e+06	1.76025e+06	1.78374e+06	1.78341e+06
Iminodiacetic acid	114.03	315.725	Organic acids and derivatives	Carboxylic acids and derivatives	Amino acids, peptides, and analogues	1.91205e+08	1.93482e+08	1.89994e+08	2.02985e+08	2.20587e+08	2.20069e+08	1.70369e+08	1.79852e+08	1.72157e+08	1.99202e+08	2.17406e+08	2.37465e+08	2.18386e+08	2.18001e+08	2.1982e+08
Indapamide	364.051	728.191	Benzenoids	Benzene and substituted derivatives	Benzenesulfonamides	4.01045e+06	4.09465e+06	4.21721e+06	5.2912e+06	1.25195e+07	1.41008e+07	7.56989e+06	9.3293e+06	5.29517e+06	3.61278e+06	6.2312e+06	8.15698e+06	8.38749e+06	8.54141e+06	8.75981e+06
Indole	116.071	535.697	Organoheterocyclic compounds	Indoles and derivatives	Indoles	9.6125e+07	1.02272e+08	9.37127e+07	1.17531e+08	1.17545e+08	1.17498e+08	7.61198e+07	7.8304e+07	7.79879e+07	1.04604e+08	1.28536e+08	1.40061e+08	1.13847e+08	1.17195e+08	1.17194e+08
Indole-3-acetaldehyde	158.06	51.0143	Organoheterocyclic compounds	Indoles and derivatives	Indoles	7.84528e+06	7.16102e+06	5.83864e+06	8.20118e+06	1.33193e+07	7.34829e+06	3.99983e+06	7.84829e+06	7.74984e+06	6.22758e+06	6.59746e+06	3.68069e+06	7.68661e+06	7.74967e+06	6.82276e+06
Indole-3-butyric acid	158.082	652.26	Organoheterocyclic compounds	Indoles and derivatives	Indoles	5.09608e+07	5.08337e+07	4.76815e+07	4.71341e+07	4.28695e+07	4.7415e+07	6.68306e+07	7.0283e+07	7.03629e+07	7.07004e+07	8.65251e+07	9.6192e+07	7.23029e+07	7.23118e+07	7.33673e+07
Indoleacetic acid	174.077	428.941	Organoheterocyclic compounds	Indoles and derivatives	Indolyl carboxylic acids and derivatives	6.91903e+07	7.73089e+07	7.69436e+07	8.10369e+07	6.79205e+07	7.59324e+07	9.70623e+07	1.06108e+08	8.90378e+07	5.58511e+07	1.0044e+08	1.17698e+08	9.67358e+07	9.97558e+07	9.97615e+07
Indoleacrylic acid	142.05	510.892	Organoheterocyclic compounds	Indoles and derivatives	Indoles	2.65604e+06	2.40671e+06	2.47392e+06	2.31615e+06	1.83251e+06	2.18358e+06	2.97264e+06	3.15728e+06	2.70993e+06	3.27114e+06	2.97137e+06	3.05157e+06	3.75992e+06	3.47871e+06	3.48521e+06
Inosine	267.073	727.121	"Nucleosides, nucleotides, and analogues"	Purine nucleosides		1.19596e+08	1.17171e+08	1.10323e+08	1.07625e+08	1.18177e+08	1.15879e+08	1.52011e+08	1.63995e+08	1.51592e+08	1.13329e+08	1.57331e+08	1.55542e+08	1.49644e+08	1.51479e+08	1.51762e+08
Irisxanthone	435.103	35.0648	Organoheterocyclic compounds	Benzopyrans	1-benzopyrans	827123	1.41594e+06	1.70002e+06	2.13534e+06	2.5555e+06	1.03559e+09	2.17274e+06	792467	2.07756e+06	855557	1.29529e+06	956163	3.07013e+06	3.09095e+06	3.0701e+06
Isoanhydroicaritin	367.107	711.898	Phenylpropanoids and polyketides	Flavonoids	Flavones	3.92046e+06	3.50543e+06	3.57947e+06	3.56611e+06	3.59238e+06	3.06414e+06	3.21398e+06	2.68272e+06	3.39681e+06	5.03169e+06	3.90459e+06	3.57339e+06	3.38919e+06	3.39715e+06	3.00586e+06
Isochlorogenic acid b	515.121	438.197	Organic oxygen compounds	Organooxygen compounds	Alcohols and polyols	1.46217e+07	2.74213e+07	2.96093e+07	1.13211e+07	1.55432e+07	7.79212e+06	2.74099e+07	1.09947e+07	9.9127e+06	1.59465e+07	2.80633e+07	2.01387e+07	2.00987e+07	2.24034e+07	2.01382e+07
Isocitrate	173.009	1047.62	Organic acids and derivatives	Carboxylic acids and derivatives	Tricarboxylic acids and derivatives	1.42723e+07	8.75665e+06	6.28252e+06	1.38145e+07	1.24603e+07	1.53804e+07	1.33596e+07	1.39789e+07	1.30234e+07	1.39816e+07	2.72212e+06	1.47218e+07	1.26515e+07	1.39084e+07	1.39059e+07
Isocitric acid	173.009	684.492	Organic acids and derivatives	Carboxylic acids and derivatives	Tricarboxylic acids and derivatives	7.08672e+08	6.95916e+08	6.69969e+08	6.91539e+08	7.1978e+08	7.2764e+08	8.22211e+08	9.2878e+08	8.37379e+08	6.44583e+08	7.90212e+08	7.77701e+08	8.23644e+08	8.27331e+08	8.27337e+08
Isoleucine	130.086	487.617	Organic acids and derivatives	Carboxylic acids and derivatives	"Amino acids, peptides, and analogues"	5.27605e+08	5.5204e+08	5.36378e+08	5.41296e+08	5.51756e+08	7.10332e+08	4.18954e+08	4.26033e+08	4.33551e+08	4.84276e+08	5.70962e+08	6.04232e+08	5.63791e+08	5.76501e+08	5.75982e+08
Isomaltose	341.089	635.98	Organic oxygen compounds	Organooxygen compounds	Carbohydrates and carbohydrate conjugates	9.55265e+07	9.93639e+07	9.59693e+07	9.02976e+07	9.95123e+07	9.3334e+07	2.07022e+08	1.6628e+08	1.58806e+08	8.90554e+07	1.08586e+08	1.22828e+08	1.29557e+08	1.2957e+08	1.33012e+08
Isovaleric acid	101.059	134.202	Lipids and lipid-like molecules	Fatty Acyls	Fatty acids and conjugates	5.4166e+07	3.37206e+07	5.30491e+07	3.93545e+07	1.51236e+07	2.59503e+07	6.95681e+07	4.48945e+07	4.78599e+07	2.83966e+07	5.0093e+07	3.37066e+07	3.44466e+07	3.44468e+07	3.47209e+07
Itaconic acid	147.029	430.043	Lipids and lipid-like molecules	Fatty Acyls	Fatty acids and conjugates	5.70988e+07	5.1387e+07	6.71537e+07	6.00109e+07	4.12976e+07	4.71087e+07	5.81734e+07	5.65664e+07	5.69225e+07	3.23503e+07	5.6472e+07	6.04898e+07	5.60894e+07	5.62456e+07	5.95374e+07
Jasmonic acid	209.118	164.515	Lipids and lipid-like molecules	Fatty Acyls	Lineolic acids and derivatives	2.49523e+07	2.34604e+07	2.19472e+07	2.28004e+07	2.10826e+07	2.12894e+07	4.17503e+07	4.29168e+07	4.51066e+07	3.49529e+07	3.84157e+07	3.71114e+07	3.47316e+07	3.47308e+07	3.34603e+07
Kaempferol 3-o-rutinoside	593.153	434.808	Phenylpropanoids and polyketides	Flavonoids	Flavonoid glycosides	1.3531e+08	1.67912e+08	1.40639e+08	1.06655e+08	1.57778e+08	1.53444e+08	8.52106e+07	1.02748e+08	9.63389e+07	6.70908e+07	1.18137e+08	1.09906e+08	1.53055e+08	1.53074e+08	1.56495e+08
Ketoleucine	129.055	75.3882	Organic acids and derivatives	Keto acids and derivatives	Short-chain keto acids and derivatives	9.13164e+07	9.81256e+07	9.26963e+07	9.84166e+07	9.42457e+07	9.87063e+07	5.22858e+07	5.02826e+07	4.86023e+07	7.86386e+07	7.04225e+07	8.30365e+07	8.62407e+07	8.82041e+07	8.81315e+07
Kojic acid	141.016	593.696	Organoheterocyclic compounds	Pyrans	Pyranones and derivatives	7.3703e+07	7.69264e+07	7.38372e+07	6.60925e+07	7.65715e+07	7.05982e+07	6.60491e+07	7.26785e+07	7.68332e+07	7.38545e+07	7.70426e+07	6.90759e+07	7.72506e+07	7.52569e+07	7.72407e+07
L-2-hydroxyglutaric acid	147.029	738.064	Organic acids and derivatives	Hydroxy acids and derivatives	Short-chain hydroxy acids and derivatives	1.34214e+08	1.3111e+08	1.77324e+08	1.01666e+08	1.01494e+08	1.04745e+08	1.69467e+08	1.99248e+08	1.90675e+08	1.67492e+08	1.46356e+08	1.57393e+08	1.8405e+08	1.84164e+08	1.78481e+08
Lactulose	341.111	733.649	Organic oxygen compounds	Organooxygen compounds	Carbohydrates and carbohydrate conjugates	8.67061e+06	8.68946e+06	7.87487e+06	8.06374e+06	9.00468e+06	8.61547e+06	7.60264e+06	8.1604e+06	8.31807e+06	7.33428e+06	8.80443e+06	8.85937e+06	9.15755e+06	9.15752e+06	9.21677e+06
L-alaninamide, n-[2-[2-(hydroxyamino)-2-oxoethyl]-4-methyl-1-oxopentyl]-3-methyl-l-valyl-n-(2-aminoethyl)-	381.233	38.3552	Organic acids and derivatives	Carboxylic acids and derivatives	Amino acids, peptides, and analogues	2.27197e+06	2.79282e+06	2.39007e+06	2.60332e+06	2.88262e+06	1.81283e+06	3.03056e+06	2.41777e+06	2.64944e+06	1.70104e+06	1.75611e+06	1.38514e+06	2.65353e+06	2.92217e+06	2.72082e+06
L-Arabinono-1,4-lactone	147.029	115.886				1.57273e+08	1.53827e+08	1.56069e+08	1.63834e+08	1.59242e+08	1.54311e+08	1.60713e+08	1.55152e+08	1.48352e+08	1.5835e+08	1.58957e+08	1.51657e+08	1.63818e+08	1.62938e+08	1.63805e+08
L-Arginine	173.104	948.714	Organic acids and derivatives	Carboxylic acids and derivatives	"Amino acids, peptides, and analogues"	2.16189e+07	2.15167e+07	3.94031e+07	3.57834e+07	2.89882e+07	2.64608e+07	1.94172e+07	1.61765e+07	1.94552e+07	2.17465e+07	1.97272e+07	2.32719e+07	2.45746e+07	2.38392e+07	2.45808e+07
Lauric isopropanolamide	256.237	57.2255	Lipids and lipid-like molecules	Fatty Acyls	Fatty amides	6.32435e+07	7.29091e+07	7.64265e+07	8.76164e+07	7.02035e+07	1.89019e+08	1.05761e+08	6.23312e+07	6.69628e+07	5.61368e+07	4.00159e+07	4.91416e+07	7.05453e+07	6.82728e+07	7.05269e+07
L-Carnosine	225.113	142.141	Organic acids and derivatives	Peptidomimetics	Hybrid peptides	1.91358e+06	2.06567e+06	1.80328e+06	1.54124e+06	1.53192e+06	2.19294e+06	1.41789e+07	1.31874e+07	1.63294e+07	5.08521e+06	6.08032e+06	4.46529e+06	5.44522e+06	5.46002e+06	5.70034e+06
L-dihydroorotate	315.081	315.726	Organic acids and derivatives	Carboxylic acids and derivatives	Amino acids, peptides, and analogues	7.84054e+06	7.48918e+06	7.76465e+06	7.22259e+06	9.21698e+06	8.99453e+06	5.85325e+06	6.06238e+06	6.2126e+06	8.47846e+06	8.77479e+06	1.00048e+07	7.72696e+06	7.64887e+06	7.65041e+06
Leu-His	267.147	530.708	Organic acids and derivatives	Carboxylic acids and derivatives	Amino acids, peptides, and analogues	1.15822e+07	1.08542e+07	1.17501e+07	1.00728e+07	1.31369e+07	1.00263e+07	1.07914e+07	1.16714e+07	1.16582e+07	7.83117e+06	1.07934e+07	1.07664e+07	1.14182e+07	1.19164e+07	1.14083e+07
Leu-Leu	243.172	315.724	Organic acids and derivatives	Carboxylic acids and derivatives	Amino acids, peptides, and analogues	3.69458e+07	3.25977e+07	3.85115e+07	2.58322e+07	2.66596e+07	2.26662e+07	2.61366e+07	2.48647e+07	2.63657e+07	2.65616e+07	2.29757e+07	2.606e+07	2.78881e+07	2.74944e+07	2.78882e+07
Leu-Ser	217.119	476.743	Organic acids and derivatives	Carboxylic acids and derivatives	Amino acids, peptides, and analogues	3.06604e+07	2.96561e+07	3.28048e+07	2.3771e+07	2.4625e+07	2.25497e+07	8.36209e+07	3.21862e+07	2.96033e+07	2.28573e+07	2.69241e+07	2.9761e+07	3.057e+07	3.11584e+07	3.1373e+07
L-Gulonic gamma-lactone	237.062	228.721	Organoheterocyclic compounds	Lactones	Gamma butyrolactones	5.10683e+07	4.32021e+07	3.99775e+07	3.30549e+07	3.31718e+07	6.9031e+07	7.54865e+07	7.23011e+07	4.02735e+07	3.62591e+07	3.86695e+07	2.71863e+07	5.65816e+07	6.06507e+07	6.0474e+07
L-gulono-1,4-lactone	195.051	704.465	Organoheterocyclic compounds	Lactones	Gamma butyrolactones	8.82326e+08	8.18796e+08	7.90426e+08	8.46425e+08	1.0072e+09	1.35696e+09	2.2817e+09	2.44461e+09	9.55913e+08	1.92765e+09	1.11039e+09	2.71705e+09	1.05464e+09	1.08262e+09	1.08238e+09
L-gulonolactone	177.04	168.92	Organoheterocyclic compounds	Lactones	Gamma butyrolactones	6.27299e+08	6.33725e+08	6.50567e+08	5.33109e+08	5.7049e+08	5.65807e+08	7.53973e+08	7.05194e+08	7.51949e+08	5.35167e+08	6.9195e+08	7.52328e+08	7.58175e+08	7.60441e+08	8.02503e+08
Lignoceric acid	367.359	57.3109	Lipids and lipid-like molecules	Fatty Acyls	Fatty acids and conjugates	3.84401e+07	3.39723e+07	3.36662e+07	3.70689e+07	1.12403e+06	1.08911e+07	3.59774e+07	2.47661e+07	3.26315e+07	4.37578e+07	2.29921e+07	2.13751e+07	2.29339e+07	2.29583e+07	2.18163e+07
Linoleic acid	279.234	57.1173	Lipids and lipid-like molecules	Fatty Acyls	Lineolic acids and derivatives	9.94388e+06	1.42331e+07	1.66759e+07	1.59008e+07	1.6309e+07	1.52071e+07	1.42848e+07	2.69568e+07	4.52042e+07	1.15973e+07	9.27331e+06	9.94936e+06	2.0898e+07	2.91876e+07	2.05118e+07
Linolenic acid	277.218	47.1585	Lipids and lipid-like molecules	Fatty Acyls	Lineolic acids and derivatives	7.18351e+06	4.88154e+06	6.76133e+06	7.52808e+06	7.95899e+06	8.58947e+06	1.38909e+07	7.08029e+06	1.24807e+07	1.23588e+07	1.46181e+07	5.0932e+06	1.0651e+07	1.06497e+07	1.09611e+07
L-Isoleucine	130.086	545.243	Organic acids and derivatives	Carboxylic acids and derivatives	"Amino acids, peptides, and analogues"	2.22249e+07	9.095e+06	1.46132e+07	8.89746e+06	9.17508e+06	1.19951e+07	7.9248e+06	1.02947e+07	7.82635e+06	9.58101e+06	1.73813e+07	8.32079e+06	1.0368e+07	1.10429e+07	1.03699e+07
Lithosprmoside	328.108	507.643	Organic oxygen compounds	Organooxygen compounds	Carbohydrates and carbohydrate conjugates	1.00701e+07	1.02567e+07	9.01924e+06	1.54218e+07	1.86257e+07	1.94996e+07	1.292e+07	1.43231e+07	1.26803e+07	2.07137e+07	2.83057e+07	3.03952e+07	1.90617e+07	1.95107e+07	1.95583e+07
L-(+)-lactic acid	89.0232	384.578	Organic acids and derivatives	Hydroxy acids and derivatives	Alpha hydroxy acids and derivatives	3.73598e+07	3.99731e+07	3.96836e+07	5.15312e+07	5.54782e+07	5.09901e+07	2.68315e+07	2.54921e+07	2.53284e+07	1.57912e+07	2.02869e+07	2.06602e+07	3.68733e+07	3.92848e+07	3.92278e+07
L-Malic acid	133.013	678.463	Organic acids and derivatives	Hydroxy acids and derivatives	Beta hydroxy acids and derivatives	1.4108e+07	7.23761e+06	8.51685e+06	6.39902e+06	7.73211e+06	6.76458e+06	7.71235e+06	8.51564e+06	9.1023e+06	7.61223e+06	7.2594e+06	6.90509e+06	3.37399e+06	3.3743e+06	3.29985e+06
L-pyroglutamic acid	128.034	536.589	Organic acids and derivatives	Carboxylic acids and derivatives	Amino acids, peptides, and analogues	1.02448e+10	1.03783e+10	1.04563e+10	9.46855e+09	9.06382e+09	9.92977e+09	9.07315e+09	9.34344e+09	9.73828e+09	8.66492e+09	9.16765e+09	1.05375e+10	1.01026e+10	1.01421e+10	1.02502e+10
L-threonate	135.029	439.16	Organic oxygen compounds	Organooxygen compounds	Carbohydrates and carbohydrate conjugates	4.38992e+07	4.71244e+07	4.40239e+07	4.40875e+07	4.90467e+07	5.08507e+07	6.04528e+07	6.98683e+07	7.05609e+07	4.60854e+07	5.4766e+07	6.41689e+07	6.13378e+07	6.30919e+07	6.30641e+07
L-Threonine	118.05	722.736				1.90173e+06	2.63838e+06	1.5744e+06	2.31649e+06	2.18802e+06	2.38765e+06	2.09733e+06	3.14397e+06	1.92807e+06	2.24172e+06	3.38549e+06	3.63118e+06	2.805e+06	2.7701e+06	2.69572e+06
L-Tryptophan	203.083	514.745	Organoheterocyclic compounds	Indoles and derivatives	Indolyl carboxylic acids and derivatives	1.0749e+06	630342	571202	743968	4.40471e+06	581075	1.05953e+06	985844	965285	4.46665e+06	1.25605e+06	1.30872e+06	743816	711478	779665
Lucidin	251.039	808.013	Benzenoids	Anthracenes	Anthraquinones	878929	1.01683e+06	930457	1.33103e+06	1.51296e+06	1.53104e+06	1.53632e+06	1.50896e+06	1.64008e+06	1.03959e+06	1.7466e+06	2.08549e+06	1.49917e+06	1.50295e+06	1.58769e+06
Lumichrome	241.073	97.7846	Organoheterocyclic compounds	Pteridines and derivatives	Alloxazines and isoalloxazines	3.09913e+07	3.19438e+07	3.15431e+07	3.1796e+07	3.67403e+07	3.19154e+07	2.91277e+07	3.41069e+07	2.9372e+07	2.4349e+07	3.08442e+07	3.32648e+07	3.14193e+07	3.14188e+07	3.17825e+07
Lusitanicoside	441.178	360.011	Organic oxygen compounds	Organooxygen compounds	Carbohydrates and carbohydrate conjugates	2.56535e+06	2.75377e+06	2.61607e+06	2.01249e+06	2.11468e+06	2.47968e+06	3.39116e+06	3.63299e+06	3.63318e+06	2.66301e+06	3.82286e+06	4.47151e+06	3.62493e+06	3.34155e+06	3.62039e+06
L-Valine	116.071	768.624	Organic acids and derivatives	Carboxylic acids and derivatives	"Amino acids, peptides, and analogues"	7.13948e+06	2.22043e+06	4.09841e+06	3.34875e+06	7.61039e+06	3.68465e+06	1.93359e+06	3.69021e+06	2.79042e+06	2.18205e+06	5.03305e+06	4.44301e+06	2.76656e+06	2.16016e+06	2.74645e+06
Lysine	145.097	972.709	Organic acids and derivatives	Carboxylic acids and derivatives	Amino acids, peptides, and analogues	4.96163e+07	5.98484e+07	5.14409e+07	7.058e+07	5.69954e+07	4.27448e+07	5.95289e+07	4.59658e+07	6.78564e+07	3.02964e+07	4.76465e+07	5.6075e+07	2.73247e+07	3.90421e+07	3.90933e+07
Malate	133.013	881.728	Organic acids and derivatives	Hydroxy acids and derivatives	Beta hydroxy acids and derivatives	8.36053e+06	1.05316e+07	1.00228e+07	1.37367e+07	8.65796e+06	1.2545e+07	6.3979e+06	9.21897e+06	1.06512e+07	6.70471e+06	5.43395e+06	1.09256e+07	1.08775e+07	9.00626e+06	1.07158e+07
Maleamic acid	114.019	686.644	Lipids and lipid-like molecules	Fatty Acyls	Fatty acids and conjugates	3.25041e+07	3.36667e+07	3.31058e+07	3.38286e+07	4.03987e+07	3.83826e+07	3.08215e+07	3.18853e+07	3.3163e+07	2.9155e+07	3.99268e+07	3.95936e+07	4.07654e+07	4.07727e+07	4.13427e+07
Maleic acid	115.003	468.595	Organic acids and derivatives	Carboxylic acids and derivatives	Dicarboxylic acids and derivatives	3.07987e+07	3.04311e+07	4.22246e+07	2.88643e+07	2.69578e+07	2.8916e+07	3.01482e+07	4.62845e+07	2.89707e+07	4.37218e+07	2.6846e+07	3.07331e+07	2.74988e+07	2.77405e+07	2.77404e+07
Malonic acid	103.002	707.555	Organic acids and derivatives	Carboxylic acids and derivatives	Dicarboxylic acids and derivatives	4.55231e+07	9.35621e+07	2.20073e+07	8.88534e+07	2.16703e+07	8.50105e+07	1.83496e+07	3.55467e+07	1.65566e+07	2.32505e+07	3.9364e+07	7.62573e+07	1.82699e+07	1.73324e+07	1.82655e+07
Maltitol	344.136	456.649				3.47134e+09	3.49886e+09	3.22349e+09	3.45008e+09	3.30809e+09	3.08036e+09	2.38761e+09	2.38553e+09	2.50004e+09	2.41986e+09	2.81759e+09	2.86621e+09	3.31305e+09	3.31319e+09	3.33577e+09
Maltotriose	503.142	583.359	Organic oxygen compounds	Organooxygen compounds	Carbohydrates and carbohydrate conjugates	1.7189e+06	1.72819e+06	1.84306e+06	1.95749e+06	2.02743e+06	1.98706e+06	3.8491e+06	3.86162e+06	3.83523e+06	3.12637e+06	3.53216e+06	3.83062e+06	2.94998e+06	2.94937e+06	3.01482e+06
Marticin	375.071	611.968				1.9031e+06	1.68562e+06	1.72859e+06	869040	1.42129e+06	1.19113e+06	1.35332e+06	1.38242e+06	1.2197e+06	346027	610781	926667	1.6546e+06	1.68331e+06	1.68272e+06
Melezitose	503.164	840.042	Organic oxygen compounds	Organooxygen compounds	Carbohydrates and carbohydrate conjugates	2.78515e+06	2.63196e+06	2.55082e+06	2.03805e+06	2.31246e+06	2.16101e+06	3.56422e+06	4.07291e+06	7.43325e+06	2.20335e+06	2.81995e+06	3.05082e+06	2.9685e+06	2.96783e+06	3.05166e+06
Mestranol	309.175	37.4225	Lipids and lipid-like molecules	Steroids and steroid derivatives	Estrane steroids	1.14295e+07	1.33271e+07	1.23778e+07	1.50053e+07	1.25893e+07	8.57297e+06	1.47752e+07	1.00846e+07	1.18054e+07	6.39162e+06	7.30273e+06	7.17584e+06	1.28381e+07	1.28385e+07	1.29003e+07
Met-Asp	263.072	691.666	Organic acids and derivatives	Carboxylic acids and derivatives	Amino acids, peptides, and analogues	3.50395e+06	3.66058e+06	3.54132e+06	2.70117e+06	3.83425e+06	2.98747e+06	2.46245e+06	2.66441e+06	3.25539e+06	2.84721e+06	3.33032e+06	4.39709e+06	3.89818e+06	3.92051e+06	3.98995e+06
Methylphosphonothioic acid o-ethyl ester	110.975	52.7842				1.58465e+07	1.80605e+07	1.84803e+07	1.69609e+07	1.26261e+07	1.66124e+07	2.55573e+07	1.77738e+07	1.83648e+07	1.63162e+07	1.41217e+07	1.60326e+07	2.136e+07	2.1431e+07	2.25307e+07
Mevalonic acid	147.044	461.205	Lipids and lipid-like molecules	Fatty Acyls	Fatty acids and conjugates	1.27386e+08	6.95599e+07	1.21233e+08	1.10887e+08	1.19651e+08	1.20052e+08	8.7985e+07	8.63149e+07	8.96596e+07	5.5479e+07	7.86893e+07	8.24633e+07	1.08224e+08	1.08112e+08	1.03266e+08
Mitoxantrone	443.194	597.339	Benzenoids	Anthracenes	Anthraquinones	6.24796e+07	6.29505e+07	6.20985e+07	5.827e+07	5.91558e+07	3.85298e+07	7.53752e+07	8.47821e+07	8.26674e+07	6.62326e+07	8.19439e+07	8.83759e+07	6.59239e+07	6.59066e+07	6.23258e+07
Mitragynine	397.228	39.5164				2.53116e+06	3.23704e+06	3.54116e+06	4.06517e+06	3.23695e+06	2.62992e+06	4.1152e+06	3.12289e+06	3.25249e+06	1.72235e+06	1.99598e+06	2.21762e+06	3.34157e+06	3.1811e+06	3.34157e+06
Monobutyl phthalate	177.077	425.378	Benzenoids	Benzene and substituted derivatives	Benzoic acids and derivatives	1.62895e+06	1.21444e+06	1.31084e+06	909644	712593	935278	5.15173e+06	5.59467e+06	4.41029e+06	1.0389e+06	2.23475e+06	1.56534e+06	2.40081e+06	2.40161e+06	2.71653e+06
Mucic acid	209.03	865.431	Organic oxygen compounds	Organooxygen compounds	Carbohydrates and carbohydrate conjugates	8.70923e+06	9.19012e+06	7.81263e+06	6.45648e+06	9.84875e+06	1.04093e+07	2.08682e+07	1.08191e+07	1.06247e+07	8.51542e+06	1.1302e+07	1.3206e+07	9.82973e+06	1.01463e+07	1.01519e+07
Myristic acid	227.202	77.6219	Lipids and lipid-like molecules	Fatty Acyls	Fatty acids and conjugates	2.0122e+07	2.41988e+07	1.98855e+07	8.77278e+06	9.60819e+06	8.90786e+06	2.1789e+07	1.6445e+07	2.08646e+07	1.15539e+07	9.91238e+06	9.70748e+06	1.29637e+07	1.46456e+07	1.28871e+07
N-(2-acetamido)iminodiacetic acid	189.066	127.705	Organic acids and derivatives	Carboxylic acids and derivatives	Amino acids, peptides, and analogues	5.02355e+06	9.75787e+06	9.3425e+06	7.16916e+06	8.40651e+06	6.54384e+06	8.8316e+06	7.27917e+06	8.19728e+06	1.00402e+07	7.08966e+06	1.33555e+07	9.68366e+06	9.38985e+06	1.01598e+07
N2,N2-Dimethylguanosine	310.109	307.847				2.07111e+06	2.08977e+06	2.1331e+06	2.8802e+06	3.31265e+06	2.88844e+06	2.36423e+06	2.20747e+06	2.5136e+06	3.51617e+06	3.94564e+06	3.93139e+06	2.56244e+06	2.64542e+06	2.64548e+06
N6-methyladenine	148.062	414.707	Organoheterocyclic compounds	Imidazopyrimidines	Purines and purine derivatives	1.78093e+06	1.90208e+06	1.88657e+06	2.32595e+06	2.0468e+06	2.03758e+06	2.65215e+06	2.64716e+06	2.61333e+06	2.33768e+06	2.70762e+06	2.95054e+06	2.49535e+06	2.49607e+06	2.56773e+06
N-Acetyl-D-Glucosamine 6-Phosphate	300.05	864.505	Organic oxygen compounds	Organooxygen compounds	Carbohydrates and carbohydrate conjugates	469956	471872	253259	387307	442012	406433	373113	691448	629407	465441	437901	761293	454706	515753	456077
N-Acetyl-D-lactosamine	383.147	463.913				1.58113e+08	1.70918e+08	1.60697e+08	1.48717e+08	1.48163e+08	1.78215e+08	2.13271e+08	1.96673e+08	2.01659e+08	1.34016e+08	2.17503e+08	2.09354e+08	2.01796e+08	2.08964e+08	2.09594e+08
N-acetyl-dl-serine	146.045	542.308	Organic acids and derivatives	Carboxylic acids and derivatives	Amino acids, peptides, and analogues	6.94051e+07	1.09017e+08	5.95117e+07	8.46222e+07	1.14909e+08	1.00481e+08	6.86585e+07	7.21595e+07	1.07047e+08	5.46966e+07	8.77401e+07	8.23266e+07	8.26014e+07	8.28881e+07	9.49233e+07
N-Acetylglucosamine 1-phosphate	300.05	845.418	Organic oxygen compounds	Organooxygen compounds	Carbohydrates and carbohydrate conjugates	6.0132e+06	7.7987e+06	3.40628e+06	5.02678e+06	6.01373e+06	5.03426e+06	6.52595e+06	5.71379e+06	5.14284e+06	5.18646e+06	5.97832e+06	4.74092e+06	5.27401e+06	5.30206e+06	4.42316e+06
N-acetylglutamate	188.056	729.275	Organic acids and derivatives	Carboxylic acids and derivatives	Amino acids, peptides, and analogues	1.62852e+06	1.88873e+06	1.68508e+06	2.03266e+06	2.24517e+06	2.26545e+06	2.18422e+06	2.2815e+06	2.20832e+06	1.45115e+06	1.80506e+06	1.83356e+06	2.22149e+06	2.22142e+06	2.2652e+06
N-Acetyl-L-alanine	130.05	677.491	Organic acids and derivatives	Carboxylic acids and derivatives	"Amino acids, peptides, and analogues"	2.45968e+06	3.39465e+06	3.57864e+06	2.46768e+06	2.73476e+06	2.13457e+06	3.69177e+06	1.45021e+06	2.67285e+06	3.39546e+06	3.88059e+06	2.021e+06	2.83673e+06	3.94527e+06	3.93676e+06
N-acetyl-l-methionine	190.054	636.025	Organic acids and derivatives	Carboxylic acids and derivatives	Amino acids, peptides, and analogues	2.12216e+06	1.738e+06	1.83939e+06	1.25399e+06	1.43388e+06	1.22024e+06	3.59195e+06	3.67668e+06	3.39049e+06	2.7955e+06	2.83485e+06	3.23878e+06	2.73848e+06	2.73992e+06	2.77994e+06
N-acetyl-l-phenylalanine	206.082	590.182	Organic acids and derivatives	Carboxylic acids and derivatives	Amino acids, peptides, and analogues	2.7766e+06	2.96562e+06	2.59086e+06	2.13635e+06	2.3605e+06	2.1743e+06	3.47181e+06	3.46965e+06	3.35489e+06	3.0941e+06	3.28073e+06	3.88472e+06	3.21415e+06	3.51049e+06	3.50495e+06
N-acetylneuraminic acid	290.089	681.483	Organic oxygen compounds	Organooxygen compounds	Carbohydrates and carbohydrate conjugates	4.43939e+07	4.84471e+07	4.5152e+07	3.00754e+07	2.70024e+07	2.65719e+07	6.19846e+07	6.64155e+07	6.31027e+07	4.95842e+07	4.45446e+07	4.55809e+07	4.75916e+07	4.84421e+07	4.84474e+07
N-acetylserine	146.045	660.919	Organic acids and derivatives	Carboxylic acids and derivatives	Amino acids, peptides, and analogues	3.02494e+06	3.06215e+06	2.76735e+06	3.14332e+06	3.26661e+06	2.74663e+06	3.76101e+06	3.86011e+06	3.63045e+06	2.89623e+06	4.08782e+06	4.28688e+06	3.65153e+06	3.72563e+06	3.65176e+06
N-acetyltryptophan	245.094	592.613	Organic acids and derivatives	Carboxylic acids and derivatives	Amino acids, peptides, and analogues	7.02797e+06	7.12495e+06	6.71106e+06	7.2705e+06	8.15917e+06	8.24756e+06	2.0781e+07	2.29261e+07	2.23799e+07	1.9362e+07	2.45935e+07	2.61688e+07	1.61878e+07	1.63667e+07	1.64376e+07
Naringenin-7-o-glucoside	433.115	259.778	Phenylpropanoids and polyketides	Flavonoids	Flavonoid glycosides	1.40563e+07	1.44631e+07	1.44079e+07	1.2209e+07	1.37021e+07	1.25842e+07	1.41976e+07	1.38878e+07	1.59464e+07	1.21772e+07	1.28355e+07	1.47019e+07	1.42269e+07	1.44088e+07	1.43737e+07
Naringenin chalcone	271.061	82.0791	Phenylpropanoids and polyketides	Linear 1,3-diarylpropanoids	Chalcones and dihydrochalcones	7.31735e+06	7.43159e+06	5.50778e+06	1.06643e+06	1.57834e+06	1.17946e+06	2.67763e+06	2.78976e+06	252710	1.99986e+06	199197	632186	2.31061e+06	2.31029e+06	2.46247e+06
Neochlorogenic acid	179.056	631.576	Organic oxygen compounds	Organooxygen compounds	Alcohols and polyols	7.08362e+07	4.14838e+07	8.54902e+07	5.37065e+07	2.48267e+07	3.60047e+07	3.99626e+07	9.23373e+07	4.01881e+07	2.56036e+07	4.49951e+07	9.39142e+07	3.96946e+07	3.67366e+07	3.95556e+07
Nicotinate d-ribonucleotide	211.002	889.832	Nucleosides, nucleotides, and analogues	Pyridine nucleotides	Nicotinic acid nucleotides	2.88899e+06	4.12035e+06	1.6645e+06	1.93102e+06	1.52201e+06	3.60143e+06	2.89419e+06	7.8786e+06	3.14356e+06	2.71704e+06	3.45013e+06	7.22302e+06	3.19129e+06	3.27135e+06	3.50254e+06
N,n'-dicarbobenzyloxy-l-ornithine	183.033	54.7956	Benzenoids	Benzene and substituted derivatives	Benzyloxycarbonyls	2.41965e+07	2.98389e+07	2.95984e+07	3.83943e+06	3.63066e+06	4.62586e+06	3.02913e+07	4.09806e+06	4.83683e+06	2.77758e+07	2.64837e+07	3.25524e+07	2.49872e+07	2.49831e+07	9.59756e+06
Nonanoic acid	157.123	50.2017	Lipids and lipid-like molecules	Fatty Acyls	Fatty acids and conjugates	3.14007e+07	1.56375e+07	1.22097e+07	1.702e+07	1.92327e+07	2.60275e+07	7.15209e+06	9.506e+06	1.32387e+07	6.99956e+06	1.68761e+07	9.56637e+06	2.00578e+07	2.00667e+07	1.82401e+07
Noreugenin	191.019	450.877	Organoheterocyclic compounds	Benzopyrans	1-benzopyrans	2.60638e+08	1.61194e+08	1.7925e+08	2.10218e+08	1.68382e+08	8.7749e+07	1.57789e+08	1.74851e+08	1.81908e+08	1.62658e+08	1.91903e+08	1.79711e+08	1.70497e+08	1.16263e+08	1.70028e+08
N-(phosphonomethyl)glycine	168.027	742.198	Organic acids and derivatives	Carboxylic acids and derivatives	Amino acids, peptides, and analogues	1.04231e+07	8.74778e+06	8.4919e+06	8.10037e+06	8.48817e+06	9.62349e+06	6.17774e+06	6.27831e+06	9.94338e+06	1.0232e+07	6.58191e+06	5.59649e+06	7.45336e+06	6.78635e+06	6.84853e+06
N-phthalyl-l-tryptophan	160.016	208.42	Organoheterocyclic compounds	Indoles and derivatives	Indolyl carboxylic acids and derivatives	1.95858e+07	2.00669e+07	1.40121e+07	1.88742e+07	1.53499e+07	1.50181e+07	1.75066e+07	1.8782e+07	1.52612e+07	1.71159e+07	1.84781e+07	3.50362e+07	1.62225e+07	1.62315e+07	1.55042e+07
O-acetylserine	146.045	509.748	Organic acids and derivatives	Carboxylic acids and derivatives	Amino acids, peptides, and analogues	5.68792e+06	5.18433e+06	5.47618e+06	7.79245e+06	5.19715e+06	5.9047e+06	4.10657e+06	8.08028e+06	4.32155e+06	2.01089e+06	5.89422e+06	8.12853e+06	3.77875e+06	3.4183e+06	1.62482e+06
Octadecanoic acid	283.265	57.2255	Lipids and lipid-like molecules	Fatty Acyls	Fatty acids and conjugates	1.22455e+08	1.41514e+08	1.60882e+08	1.68429e+08	1.25925e+08	3.50185e+08	3.01679e+08	1.61161e+08	1.67548e+08	9.35006e+07	6.80227e+07	7.47565e+07	1.40923e+08	1.38313e+08	1.40895e+08
Octanoic acid	143.107	71.8639	Lipids and lipid-like molecules	Fatty Acyls	Fatty acids and conjugates	7.8224e+06	7.44059e+06	7.79858e+06	7.83338e+06	8.30046e+06	6.96114e+06	7.43844e+06	7.72376e+06	7.45504e+06	6.22824e+06	7.5239e+06	6.88176e+06	8.56026e+06	8.55909e+06	8.40025e+06
Oleic acid	281.249	57.304	Lipids and lipid-like molecules	Fatty Acyls	Fatty acids and conjugates	3.00945e+07	3.54311e+07	3.75371e+07	3.20738e+07	2.96509e+07	3.34085e+07	4.7432e+07	2.69451e+07	3.24272e+07	2.26238e+07	1.6234e+07	1.82e+07	3.09467e+07	3.00639e+07	3.00629e+07
Orcinol	123.044	333.4	Benzenoids	Phenols	Benzenediols	768784	853132	950704	967391	1.04618e+06	1.01632e+06	2.28586e+06	2.66096e+06	2.46435e+06	1.33438e+06	1.76689e+06	1.92692e+06	1.68355e+06	1.66267e+06	1.68343e+06
Osmanthuside h	431.157	424.657	Organic oxygen compounds	Organooxygen compounds	Carbohydrates and carbohydrate conjugates	6.80928e+06	6.35378e+06	6.14656e+06	3.44502e+06	4.02059e+06	3.33178e+06	1.09812e+07	1.14267e+07	1.12066e+07	6.60183e+06	8.16306e+06	8.07559e+06	7.5924e+06	7.66452e+06	7.66512e+06
Ostruthin	297.154	42.7761	Lipids and lipid-like molecules	Prenol lipids	Terpene lactones	1.3409e+07	1.30493e+07	9.26691e+06	1.05538e+07	9.87349e+06	1.05846e+07	1.99449e+07	1.10962e+07	1.47398e+07	8.7795e+06	8.91329e+06	8.14489e+06	1.45146e+07	1.47853e+07	1.47852e+07
Oxalate	88.987	781.924	Organic acids and derivatives	Carboxylic acids and derivatives	Dicarboxylic acids and derivatives	1.74966e+07	7.27951e+06	1.56861e+07	2.01697e+07	2.33524e+07	3.61811e+07	1.54223e+07	3.42564e+07	2.76597e+07	1.92034e+07	3.14197e+07	3.92261e+07	2.64275e+07	2.64071e+07	2.54826e+07
Oxaloacetate	130.997	878.76	Organic acids and derivatives	Keto acids and derivatives	Short-chain keto acids and derivatives	1.02569e+07	1.09426e+07	5.39071e+06	1.69069e+07	9.12842e+06	5.98939e+06	1.92186e+07	5.66962e+06	1.25313e+07	3.98836e+06	5.20411e+06	7.09032e+06	1.02932e+07	8.75073e+06	8.63181e+06
Oxamate	88.0029	523.771	Organic acids and derivatives	Carboxylic acids and derivatives	Amino acids, peptides, and analogues	6.59574e+07	6.72449e+07	7.22364e+07	7.31844e+07	6.99081e+07	6.14471e+07	6.63837e+07	6.97088e+07	6.5355e+07	7.92451e+07	7.16976e+07	6.63297e+07	7.15908e+07	6.89659e+07	6.90111e+07
Oxyresveratrol	487.133	269.272				9.57979e+08	9.89869e+08	9.57915e+08	9.69549e+08	9.82667e+08	1.05468e+09	1.33933e+09	1.2689e+09	1.29655e+09	1.0418e+09	1.2982e+09	1.35432e+09	1.30709e+09	1.31172e+09	1.33316e+09
Palatinose	221.067	452.8	Lipids and lipid-like molecules	Fatty Acyls	Fatty acyl glycosides	6.65359e+07	6.73493e+07	6.59835e+07	6.34509e+07	6.40275e+07	5.54603e+07	1.73158e+08	6.46945e+07	7.00694e+07	5.68921e+07	6.47291e+07	1.7919e+08	1.77959e+08	1.72043e+08	1.72287e+08
Palmitic acid	255.234	76.2902	Lipids and lipid-like molecules	Fatty Acyls	Fatty acids and conjugates	5.26901e+08	6.36948e+08	4.34364e+08	4.36689e+08	3.80679e+08	3.34226e+08	6.38812e+08	4.61134e+08	5.96442e+08	5.50016e+08	4.94781e+08	4.48571e+08	4.62734e+08	4.62912e+08	4.51096e+08
Pantetheine	277.123	382.344	Organic acids and derivatives	Carboxylic acids and derivatives	"Amino acids, peptides, and analogues"	1.25583e+06	1.35826e+06	1.21202e+06	1.59622e+06	1.39733e+06	1.45432e+06	1.56183e+06	1.71638e+06	1.69538e+06	1.21046e+06	1.66105e+06	1.69689e+06	1.62642e+06	1.65036e+06	1.65021e+06
Pantothenate	218.103	468.264	Organic oxygen compounds	Organooxygen compounds	Alcohols and polyols	4.04351e+07	3.91582e+07	3.84495e+07	8.55026e+07	7.33863e+07	8.4415e+07	3.35627e+07	4.00212e+07	3.21595e+07	3.56876e+07	5.63186e+07	6.54061e+07	5.5227e+07	5.84018e+07	5.50363e+07
Pc 34:2	816.579	244.945	Lipids and lipid-like molecules	Glycerophospholipids	Glycerophosphocholines	5.00901e+07	4.4496e+07	5.57223e+07	3.77017e+07	4.03105e+07	3.84154e+07	4.17409e+07	3.73705e+07	4.20949e+07	3.7503e+07	4.44987e+07	2.89953e+07	3.92987e+07	3.80799e+07	3.80467e+07
Pc 36:4	840.577	242.229	Lipids and lipid-like molecules	Glycerophospholipids	Glycerophosphocholines	9.10526e+06	8.52199e+06	9.80304e+06	8.76688e+06	1.02626e+07	8.02977e+06	7.5154e+06	7.0276e+06	8.14329e+06	7.00798e+06	8.64232e+06	5.19225e+06	8.18393e+06	7.93842e+06	7.92623e+06
Pc 36:5	838.563	243.952	Lipids and lipid-like molecules	Glycerophospholipids	Glycerophosphocholines	3.9229e+06	3.79792e+06	4.1341e+06	3.98725e+06	4.94674e+06	3.99053e+06	3.38884e+06	3.51677e+06	3.91512e+06	3.39648e+06	4.09495e+06	2.71031e+06	3.95191e+06	3.95886e+06	3.83525e+06
Pe 34:3	712.495	252.514	Lipids and lipid-like molecules	Glycerophospholipids	Glycerophosphoethanolamines	5.82771e+07	5.71353e+07	5.74152e+07	4.75678e+07	2.64158e+07	3.66314e+07	4.94329e+07	4.78677e+07	4.36976e+07	4.87592e+07	4.89913e+07	4.28218e+07	4.37615e+07	4.37665e+07	4.46602e+07
Pe 36:4	738.511	56.2719	Lipids and lipid-like molecules	Glycerophospholipids	Glycerophosphoethanolamines	1.39645e+08	1.51479e+08	1.30376e+08	1.24807e+08	1.33279e+08	1.3632e+08	1.7682e+08	1.36655e+08	1.29929e+08	1.48594e+08	1.29733e+08	1.39086e+08	1.74025e+08	1.6492e+08	1.74129e+08
Pentadecanoic acid	241.218	77.4491	Lipids and lipid-like molecules	Fatty Acyls	Fatty acids and conjugates	7.02467e+06	6.93978e+06	6.28159e+06	6.30397e+06	6.85613e+06	6.64661e+06	9.09031e+06	7.93639e+06	6.59311e+06	6.52205e+06	7.24031e+06	6.29715e+06	7.11154e+06	6.7042e+06	6.69017e+06
Phe-met	295.113	297.39	Organic acids and derivatives	Carboxylic acids and derivatives	Amino acids, peptides, and analogues	4.87726e+06	5.34948e+06	5.15666e+06	3.94428e+06	5.22505e+06	4.33122e+06	3.41115e+06	3.65923e+06	7.14073e+06	3.74012e+06	3.37028e+06	4.37287e+06	5.06195e+06	5.12163e+06	5.12322e+06
Phenylacetic acid	135.044	67.2327				1.18277e+07	9.25901e+06	1.2111e+07	2.20785e+06	1.6466e+07	1.58717e+07	1.20108e+07	9.38145e+06	6.39673e+06	1.25573e+07	8.94348e+06	8.48704e+06	8.74782e+06	1.23143e+07	9.30487e+06
Phenylacetyl-l-glutamine	145.061	681.506	Organic acids and derivatives	Carboxylic acids and derivatives	Amino acids, peptides, and analogues	6.38758e+09	6.56032e+09	6.11377e+09	6.4649e+09	7.31627e+09	7.00186e+09	5.66369e+09	6.0636e+09	6.00371e+09	5.84151e+09	7.12298e+09	7.24108e+09	7.16097e+09	7.1633e+09	7.21925e+09
Phenyl-butyryl-glutamine	291.136	527.14	Organic acids and derivatives	Carboxylic acids and derivatives	Amino acids, peptides, and analogues	7.66902e+07	8.68049e+07	9.17554e+07	9.11905e+07	9.15783e+07	1.08753e+08	9.78364e+07	5.11506e+07	9.51498e+07	2.4738e+07	1.12131e+08	4.32151e+07	8.73074e+07	7.63552e+07	8.74662e+07
Phenylethyl 2-glucoside	283.104	638.138	Organic oxygen compounds	Organooxygen compounds	Carbohydrates and carbohydrate conjugates	754174	5.47078e+06	5.17452e+06	8.49337e+06	5.01961e+06	4.16712e+06	746458	655235	8.0044e+06	558781	1.22356e+06	881533	2.00413e+06	3.22458e+06	1.96863e+06
Phenylethyl primeveroside	461.153	643.578	Organic oxygen compounds	Organooxygen compounds	Carbohydrates and carbohydrate conjugates	2.5901e+06	2.31762e+06	2.15827e+06	2.25465e+06	2.54214e+06	2.22696e+06	2.57542e+06	2.57345e+06	2.6054e+06	2.26328e+06	3.00217e+06	2.61937e+06	2.71256e+06	2.76119e+06	2.71234e+06
Phenyllactic acid	165.055	189.788	Phenylpropanoids and polyketides	Phenylpropanoic acids		3.69904e+07	3.04164e+07	1.58332e+07	9.83181e+06	8.00044e+06	8.81603e+06	177497	9.70444e+06	9.72015e+06	7.57108e+06	7.45377e+06	7.74425e+06	8.49631e+06	8.46968e+06	9.59396e+06
Phenylpyruvate	163.039	76.2193	Benzenoids	Benzene and substituted derivatives	Phenylpyruvic acid derivatives	1.78267e+07	1.59896e+07	1.62902e+07	1.02832e+07	1.05019e+07	190248	1.33896e+07	1.42879e+07	1.33443e+07	7.85446e+06	1.12754e+07	9.97915e+06	1.37632e+07	1.27068e+07	1.37552e+07
Phe-tyr	327.137	330.06	Organic acids and derivatives	Carboxylic acids and derivatives	Amino acids, peptides, and analogues	1.75344e+06	1.67801e+06	1.80401e+06	1.51768e+06	1.64054e+06	1.34926e+06	1.35402e+06	1.59289e+06	1.63075e+06	1.38664e+06	1.47986e+06	1.56569e+06	1.69489e+06	1.69495e+06	1.71566e+06
Phloretin	273.064	124.384	Phenylpropanoids and polyketides	Linear 1,3-diarylpropanoids	Chalcones and dihydrochalcones	5.08791e+06	4.59456e+06	4.547e+06	6.4156e+06	7.33042e+06	6.73473e+06	5.94758e+06	5.73862e+06	6.42664e+06	6.37995e+06	7.51411e+06	7.79115e+06	7.03564e+06	7.12143e+06	7.12127e+06
Phloroglucinocarboxaldehyde	107.024	681.506	Benzenoids	Phenols	Benzenetriols and derivatives	1.49891e+07	1.61728e+07	1.58007e+07	1.39805e+07	1.59271e+07	1.65533e+07	1.25705e+07	1.41597e+07	1.31909e+07	1.39593e+07	1.61997e+07	1.55282e+07	1.57343e+07	1.57351e+07	1.54611e+07
Phosphoric acid	96.9587	811.7	Homogeneous non-metal compounds	Non-metal oxoanionic compounds	Non-metal phosphates	5.04677e+08	5.01722e+08	5.36105e+08	5.9458e+08	1.9292e+09	1.88254e+09	7.08931e+08	8.78305e+08	6.71802e+08	7.51787e+08	7.10431e+08	7.1661e+08	1.49847e+09	1.49839e+09	1.51874e+09
P-hydroxy-cinnamic acid	163.039	595.809	Organic oxygen compounds	Organooxygen compounds	Carbohydrates and carbohydrate conjugates	1.91564e+08	1.92653e+08	1.91323e+08	1.92461e+08	1.86073e+08	1.44047e+08	2.13449e+08	2.19925e+08	2.23017e+08	1.53338e+08	1.86018e+08	1.91575e+08	1.90069e+08	1.90545e+08	1.85199e+08
Physcion	283.079	484.197	Benzenoids	Anthracenes	Anthraquinones	1.72346e+07	1.62368e+07	1.48723e+07	8.94777e+06	9.12068e+06	1.24235e+07	2.53941e+07	2.10943e+07	2.23956e+07	1.74434e+07	1.6771e+07	2.04012e+07	1.70592e+07	1.58688e+07	1.70953e+07
Phytanic acid	311.297	57.3843	Lipids and lipid-like molecules	Prenol lipids	Diterpenoids	1.03519e+07	1.25607e+07	1.48194e+07	3.17476e+07	8.32257e+06	1.09489e+07	2.75203e+07	1.61326e+07	1.718e+07	1.56312e+07	1.14496e+07	1.31066e+07	1.30834e+07	1.30848e+07	1.28722e+07
Picolinic acid	122.036	75.4883	Organoheterocyclic compounds	Pyridines and derivatives	Pyridinecarboxylic acids and derivatives	1.64371e+07	1.86193e+07	1.51939e+07	9.52174e+06	1.06886e+07	9.81314e+06	1.94002e+07	2.2163e+07	2.02687e+07	1.40516e+07	1.52569e+07	1.59262e+07	2.63053e+07	2.21017e+07	2.20509e+07
Pipecolate	128.071	553.566	Organic acids and derivatives	Carboxylic acids and derivatives	Amino acids, peptides, and analogues	2.73069e+06	1.83712e+06	3.05894e+06	7.36733e+06	5.4907e+06	4.95872e+06	2.85869e+06	3.09924e+06	2.82877e+06	4.21793e+06	3.68228e+06	3.13145e+06	4.285e+06	3.68577e+06	4.27699e+06
Probucol	277.185	48.718	Benzenoids	Benzene and substituted derivatives	Phenylpropanes	3.41572e+06	7.91869e+06	3.49577e+06	3.01386e+06	8.49932e+06	682413	1.06509e+07	6.23896e+06	4.9356e+06	9.0336e+06	1.08194e+07	9.79193e+06	7.97433e+06	8.43449e+06	7.99806e+06
Propanedinitrile, 2-[[3-bromo-5-(1,1-dimethylethyl)-4-hydroxyphenyl]methylene]-	305.033	764.366	Benzenoids	Benzene and substituted derivatives	Phenylpropanes	6.06261e+06	6.03001e+06	5.34416e+06	6.20624e+06	6.54811e+06	7.95631e+06	6.09804e+06	5.95137e+06	5.85988e+06	5.46224e+06	6.83373e+06	7.82198e+06	7.2763e+06	7.27792e+06	7.67336e+06
Propanoic acid	72.9918	452.707	Organic acids and derivatives	Carboxylic acids and derivatives	Carboxylic acids	3.66376e+07	4.3777e+07	3.68036e+07	5.17756e+07	5.19677e+07	4.84888e+07	4.80127e+07	4.61877e+07	4.38499e+07	3.07071e+07	3.10688e+07	4.95399e+07	5.42757e+07	4.92443e+07	7.34959e+07
Propanoic acid, 3-[[[2-[(aminoiminomethyl)amino]-4-thiazolyl]methyl]thio]-	294.994	971.079	Organoheterocyclic compounds	Azoles	Thiazoles	2.27099e+07	2.23552e+07	2.36148e+07	3.40397e+07	2.17418e+07	2.57769e+07	6.13576e+07	2.31418e+07	2.20511e+07	2.40193e+07	3.93696e+07	3.19158e+07	2.95032e+07	2.94322e+07	3.10503e+07
Propiolic acid	68.9946	43.8929	Organic acids and derivatives	Carboxylic acids and derivatives	Carboxylic acids	1.20239e+07	1.12556e+07	1.13709e+07	1.11208e+07	1.26096e+07	1.11778e+07	1.19443e+07	1.95141e+07	2.30217e+07	1.19248e+07	1.30371e+07	1.14077e+07	1.73335e+07	1.49837e+07	1.49265e+07
Propionic acid	73.0282	175.256	Organic acids and derivatives	Carboxylic acids and derivatives	Carboxylic acids	4.03825e+07	6.8937e+07	4.00744e+07	5.82217e+07	4.97353e+07	4.36155e+07	4.336e+07	4.17622e+07	3.73676e+07	4.25146e+07	3.99832e+07	4.01207e+07	4.0001e+07	4.00785e+07	4.13477e+07
Prostaglandin f2.beta.	309.208	83.9216	Lipids and lipid-like molecules	Fatty Acyls	Eicosanoids	1.05616e+08	1.04161e+08	9.52644e+07	9.69341e+07	8.47299e+07	6.97355e+07	1.27049e+08	1.68766e+08	1.96844e+08	1.08955e+08	9.15656e+07	1.0007e+08	1.03709e+08	1.03709e+08	1.02277e+08
Pseudouridine	243.062	422.536	"Nucleosides, nucleotides, and analogues"	Nucleoside and nucleotide analogues		1.03387e+08	1.03039e+08	9.66812e+07	1.00627e+08	1.06745e+08	1.0409e+08	1.28044e+08	1.30341e+08	1.28777e+08	1.02851e+08	1.31846e+08	1.3454e+08	1.26113e+08	1.26155e+08	1.27532e+08
Pteryxin	385.111	386.72	Phenylpropanoids and polyketides	Coumarins and derivatives	Pyranocoumarins	1.20089e+07	1.11212e+07	1.06061e+07	9.66592e+06	9.55679e+06	1.00759e+07	1.62705e+07	1.70045e+07	1.71371e+07	1.51561e+07	1.90156e+07	2.00786e+07	1.71697e+07	1.6884e+07	1.7168e+07
Purine	119.049	595.831	Organoheterocyclic compounds	Imidazopyrimidines	Purines and purine derivatives	5.78071e+07	5.65964e+07	5.87829e+07	6.00175e+07	6.48142e+07	4.33149e+07	7.02781e+07	7.69194e+07	7.45747e+07	5.33153e+07	5.75981e+07	6.11934e+07	5.99616e+07	6.16482e+07	5.97907e+07
Pyridoxamine	167.071	306.853	Organoheterocyclic compounds	Pyridines and derivatives	Pyridoxamines	7.70192e+06	8.13519e+06	7.6097e+06	5.90176e+06	5.29956e+06	3.22785e+06	2.29182e+07	1.67238e+07	2.42356e+07	1.219e+07	1.09444e+07	1.30338e+07	1.40958e+07	1.3072e+07	1.30731e+07
Pyrocatechol	109.028	433.815	Benzenoids	Phenols	Benzenediols	5.33378e+06	5.83313e+06	4.44335e+06	4.03989e+06	3.52664e+06	3.97249e+06	5.3016e+06	7.23714e+06	6.09382e+06	2.80219e+06	6.01201e+06	5.26141e+06	5.68624e+06	5.7213e+06	5.9804e+06
Pyruvaldehyde	71.0123	453.744	Organic oxygen compounds	Organooxygen compounds	Carbonyl compounds	1.28537e+09	2.70183e+09	1.59863e+09	1.03004e+09	6.02731e+09	4.29163e+09	4.7178e+09	3.99015e+09	3.58723e+09	7.56071e+08	1.31813e+09	3.52815e+09	3.25903e+09	2.35052e+09	3.25139e+09
Pyruvate	87.0023	33.4512	Organic acids and derivatives	Keto acids and derivatives	Alpha-keto acids and derivatives	1.87943e+08	1.91143e+08	2.75715e+06	2.77763e+06	2.50689e+06	2.91151e+06	2.36251e+06	2.80246e+06	443483	2.19738e+06	442356	3.00675e+06	3.0564e+07	3.10158e+07	3.10064e+07
Quinate	191.056	614.837	Organic oxygen compounds	Organooxygen compounds	Alcohols and polyols	1.27695e+09	1.25705e+09	1.23397e+09	1.13713e+09	1.1658e+09	1.14868e+09	1.28781e+09	1.36028e+09	1.45476e+09	1.18792e+09	1.34774e+09	1.30239e+09	1.31007e+09	1.33773e+09	1.31028e+09
Raltitrexed	439.128	626.178	Organic acids and derivatives	Carboxylic acids and derivatives	Amino acids, peptides, and analogues	2.08634e+06	1.88899e+06	2.01406e+06	2.12909e+06	2.05125e+06	1.90111e+06	2.18152e+06	2.08383e+06	1.91481e+06	1.86367e+06	2.07986e+06	1.85503e+06	2.13392e+06	2.10997e+06	2.10994e+06
Rauwolscine	353.201	38.5012				5.82366e+06	7.16826e+06	7.87069e+06	9.61831e+06	6.95508e+06	4.96925e+06	9.07852e+06	6.31521e+06	6.54132e+06	3.75158e+06	4.40601e+06	4.16268e+06	6.84829e+06	7.31032e+06	7.31043e+06
Resorcinol	109.04	681.514	Benzenoids	Phenols	Benzenediols	4.25971e+07	4.39134e+07	4.22317e+07	5.50042e+07	5.18809e+07	5.07269e+07	3.73573e+07	4.33184e+07	4.12591e+07	4.1978e+07	5.06369e+07	5.39929e+07	5.04606e+07	5.04668e+07	5.15277e+07
Resveratrol	227.06	75.3637	Phenylpropanoids and polyketides	Stilbenes		4.49576e+07	5.01999e+07	4.39224e+07	4.51155e+07	6.14193e+07	4.41465e+07	5.26578e+07	5.73738e+07	6.05291e+07	5.34993e+07	7.82878e+07	5.69487e+07	6.40551e+07	6.79804e+07	6.79596e+07
Ribitol	173.045	66.2122	Organic oxygen compounds	Organooxygen compounds	Carbohydrates and carbohydrate conjugates	1.86401e+06	2.3269e+06	2.932e+06	1.6681e+06	1.14959e+06	2.7589e+06	2.18397e+06	3.00804e+06	3.34357e+06	3.08896e+06	2.67247e+06	3.14553e+06	2.41925e+06	1.98835e+06	2.23974e+06
Rosmarinate	359.055	724.89	Phenylpropanoids and polyketides	Cinnamic acids and derivatives	Hydroxycinnamic acids and derivatives	1.32779e+07	1.23899e+07	1.14734e+07	1.11244e+07	3.65198e+07	2.71078e+07	1.33518e+07	1.64244e+07	1.44208e+07	7.0905e+06	1.51172e+07	1.80574e+07	2.09578e+07	2.00622e+07	2.01827e+07
Rutin	609.148	532.746	Phenylpropanoids and polyketides	Flavonoids	Flavonoid glycosides	1.39012e+08	2.40589e+08	1.71707e+08	8.74494e+07	1.93753e+08	7.75637e+07	1.8621e+08	2.22547e+08	1.77565e+08	1.49854e+08	2.15623e+08	1.90931e+08	2.48673e+08	2.19156e+08	2.17224e+08
(S)-2-aminobutyric acid	102.055	581.327	Organic acids and derivatives	Carboxylic acids and derivatives	"Amino acids, peptides, and analogues"	3.22409e+06	3.16457e+06	3.43755e+06	2.8007e+06	2.8132e+06	2.63771e+06	2.54468e+06	2.5507e+06	3.07992e+06	2.97245e+06	2.76684e+06	2.18019e+06	2.007e+06	2.23729e+06	2.24708e+06
Saccharate	209.03	815.948	Organic oxygen compounds	Organooxygen compounds	Carbohydrates and carbohydrate conjugates	4.21916e+07	4.46483e+07	4.16934e+07	3.84943e+07	6.09247e+07	5.97858e+07	6.47785e+07	7.73948e+07	6.6754e+07	3.04175e+07	5.17193e+07	6.18338e+07	6.08638e+07	6.25686e+07	6.2503e+07
S-adenosyl-l-homocysteine	383.101	702.33	Nucleosides, nucleotides, and analogues	5'-deoxyribonucleosides	5'-deoxy-5'-thionucleosides	5.2927e+06	5.59949e+06	5.47178e+06	7.35992e+06	5.66799e+06	4.15742e+06	6.3962e+06	6.54662e+06	6.81116e+06	5.78419e+06	6.37994e+06	6.07333e+06	7.15236e+06	7.16593e+06	7.62624e+06
Salicylaldehyde	121.029	182.592	Organic oxygen compounds	Organooxygen compounds	Carbonyl compounds	2.13869e+07	2.11607e+07	2.48326e+07	1.7886e+07	2.7491e+07	2.20434e+07	2.4577e+07	2.15423e+07	2.26664e+07	2.42257e+07	3.05973e+07	2.5941e+07	2.91879e+07	2.55569e+07	2.59222e+07
Salicylic acid	137.035	213.84	Benzenoids	Benzene and substituted derivatives	Benzoic acids and derivatives	4.78994e+07	4.75222e+07	4.53019e+07	4.17162e+07	3.87783e+07	2.40989e+07	4.5263e+07	4.70478e+07	4.35639e+07	4.27024e+07	5.0962e+07	5.35509e+07	4.33154e+07	3.85158e+07	4.3236e+07
Salicyluric acid	194.049	304.692	Benzenoids	Benzene and substituted derivatives	Benzoic acids and derivatives	719160	1.27741e+06	991830	2.72117e+06	2.5027e+06	2.14181e+06	8.45127e+06	6.96405e+06	8.45854e+06	2.0207e+06	2.48518e+06	3.30086e+06	4.01315e+06	4.01657e+06	4.11288e+06
Salidroside	299.114	247.2	Organic oxygen compounds	Organooxygen compounds	Carbohydrates and carbohydrate conjugates	1.28379e+07	1.31253e+07	1.38935e+07	1.57432e+07	1.24067e+07	1.06657e+07	1.96239e+07	1.46796e+07	2.03492e+07	2.41812e+07	2.12757e+07	2.33432e+07	1.66295e+07	1.53591e+07	1.53788e+07
Sarcosine	88.0393	711.933	Organic acids and derivatives	Carboxylic acids and derivatives	Amino acids, peptides, and analogues	2.03615e+07	2.09742e+07	3.20502e+07	2.02359e+07	2.29043e+07	2.20377e+07	3.38595e+07	3.3569e+07	3.45367e+07	2.61478e+07	3.73341e+07	4.07704e+07	3.3758e+07	3.67764e+07	3.3935e+07
Secoisolariciresinol	361.152	532.734	Lignans, neolignans and related compounds	Dibenzylbutane lignans	Dibenzylbutanediol lignans	9.73917e+06	9.70037e+06	1.09579e+07	8.68808e+06	1.12954e+07	9.47291e+06	1.70675e+07	1.38736e+07	1.32454e+07	1.27732e+07	1.63484e+07	1.43403e+07	1.345e+07	1.3443e+07	1.36968e+07
Sedoheptulose	269.089	695.989				9.47064e+06	9.59709e+06	9.71655e+06	1.14054e+07	1.19263e+07	1.19844e+07	9.99984e+06	1.07777e+07	1.05117e+07	8.5434e+06	1.2234e+07	1.16494e+07	1.15349e+07	1.16764e+07	1.16472e+07
Ser-Asn	218.067	747.596	Organic acids and derivatives	Carboxylic acids and derivatives	Amino acids, peptides, and analogues	2.25345e+06	2.31386e+06	1.75177e+06	2.60725e+06	2.69235e+06	2.08431e+06	2.46438e+06	2.89413e+06	2.77579e+06	2.32078e+06	3.06689e+06	3.00017e+06	2.66098e+06	2.66088e+06	2.67372e+06
Ser-Asp	219.062	793.796	Organic acids and derivatives	Carboxylic acids and derivatives	Amino acids, peptides, and analogues	1.27097e+06	1.33036e+06	1.26267e+06	1.22783e+06	1.99003e+06	2.00257e+06	1.87081e+06	2.08463e+06	1.81237e+06	1.12166e+06	1.92941e+06	2.07411e+06	1.85242e+06	1.89231e+06	1.92657e+06
Ser-Phe	251.104	440.973	Organic acids and derivatives	Carboxylic acids and derivatives	Amino acids, peptides, and analogues	3.03334e+07	2.92972e+07	2.75939e+07	2.2191e+07	2.49584e+07	2.27814e+07	2.63088e+07	2.79536e+07	3.02031e+07	2.33285e+07	2.51256e+07	2.95905e+07	3.00318e+07	3.00429e+07	3.04796e+07
Shanzhiside	391.107	424.7	Lipids and lipid-like molecules	Prenol lipids	Terpene glycosides	2.34091e+06	2.38262e+06	1.96081e+06	1.37682e+06	1.38148e+06	1.27546e+06	3.57888e+06	4.17969e+06	4.07228e+06	2.12644e+06	2.30397e+06	2.4466e+06	2.26071e+06	2.23749e+06	2.26114e+06
Shikimate	173.045	659.732	Organic oxygen compounds	Organooxygen compounds	Alcohols and polyols	7.72044e+06	8.15668e+06	7.41389e+06	8.42051e+06	8.59816e+06	8.50817e+06	5.91997e+06	6.40173e+06	6.49153e+06	6.30815e+06	7.31192e+06	7.8457e+06	8.39156e+06	8.39272e+06	8.45999e+06
Shikimic acid	173.057	580.037	Organic oxygen compounds	Organooxygen compounds	Alcohols and polyols	1.03091e+07	9.97417e+06	9.52335e+06	1.1267e+07	1.0542e+07	1.10744e+07	8.62303e+06	8.52952e+06	8.50895e+06	9.70545e+06	9.85773e+06	1.01534e+07	1.04804e+07	1.04804e+07	1.0493e+07
Sinapoylhexoside	385.115	205.298	Phenylpropanoids and polyketides	Cinnamic acids and derivatives	Hydroxycinnamic acids and derivatives	2.88123e+07	4.47613e+07	3.48319e+07	2.31477e+07	2.23125e+07	1.96213e+07	3.80394e+07	3.75668e+07	3.91583e+07	4.77617e+07	3.7487e+07	5.29356e+07	4.12912e+07	4.18083e+07	4.31184e+07
Sinefungin	380.157	650.148				5.11975e+07	4.98665e+07	4.8453e+07	3.90359e+07	4.05317e+07	4.09891e+07	6.87341e+07	7.61602e+07	7.69989e+07	5.07914e+07	6.64318e+07	6.86488e+07	6.26116e+07	6.26007e+07	5.93788e+07
sn-Glycerol 3-phosphoethanolamine	214.049	723.803	Lipids and lipid-like molecules	Glycerophospholipids	Glycerophosphoethanolamines	1.9937e+07	1.92762e+07	1.80812e+07	1.85594e+07	1.97647e+07	1.8967e+07	1.46618e+07	1.52341e+07	1.42158e+07	1.14399e+07	1.44449e+07	1.55381e+07	1.88411e+07	1.90609e+07	1.90582e+07
Suberic acid	173.081	665.865	Lipids and lipid-like molecules	Fatty Acyls	Fatty acids and conjugates	3.57954e+06	4.48753e+06	3.23899e+06	2.63755e+06	1.49664e+06	2.87881e+06	2.98579e+06	2.78402e+06	3.49869e+06	2.31899e+06	2.46959e+06	2.95639e+06	2.57648e+06	2.38587e+06	2.38394e+06
Succinate	117.018	725.945	Organic acids and derivatives	Carboxylic acids and derivatives	Dicarboxylic acids and derivatives	4.96008e+07	4.88423e+07	4.63379e+07	7.15131e+07	3.84091e+07	4.66008e+07	5.38942e+07	9.89524e+07	5.52736e+07	5.38976e+07	5.73594e+07	6.15285e+07	5.11783e+07	5.01434e+07	5.01244e+07
Suxibuzone	473.131	723.818	Lipids and lipid-like molecules	Fatty Acyls	Fatty acid esters	2.09099e+06	1.97889e+06	1.74417e+06	1.84535e+06	2.5504e+06	2.06963e+06	2.50862e+06	2.35446e+06	2.20797e+06	1.5942e+06	2.46982e+06	2.32439e+06	2.27426e+06	2.33544e+06	2.3079e+06
Taurine	124.006	530.798	Organic acids and derivatives	Organic sulfonic acids and derivatives	Organosulfonic acids and derivatives	3.8951e+08	3.83871e+08	3.82608e+08	2.70976e+08	2.8901e+08	2.66365e+08	4.0525e+08	4.20517e+08	4.21367e+08	3.24216e+08	3.68976e+08	3.91909e+08	3.75757e+08	3.80121e+08	3.80088e+08
Tenofovir	573.15	808.431	Organoheterocyclic compounds	Imidazopyrimidines	Purines and purine derivatives	930889	1.09766e+06	695382	1.39426e+06	268243	229904	770205	696325	1.34915e+06	1.09667e+06	790169	811519	350983	321314	314505
Terbuthylazine-tp cscd648241 (lm6)	197.118	110.808				1.09381e+07	9.65008e+06	8.51962e+06	7.56609e+06	6.35357e+06	5.68479e+06	1.9491e+07	1.9425e+07	2.18335e+07	1.51014e+07	1.35232e+07	1.21685e+07	1.31049e+07	1.31106e+07	1.35382e+07
Testosterone	287.224	174.241	Lipids and lipid-like molecules	Steroids and steroid derivatives	Androstane steroids	2.68731e+07	2.95793e+07	2.54437e+07	2.12425e+07	2.2975e+07	2.21223e+07	1.57763e+07	1.46301e+07	1.63447e+07	1.51709e+07	1.62974e+07	2.89649e+07	2.21701e+07	2.17188e+07	2.22373e+07
Thelephoric acid	351.003	754.909				3.67702e+07	3.6912e+07	3.19637e+07	1.60779e+07	2.01222e+07	2.18927e+07	1.00122e+08	1.28983e+08	9.36895e+07	2.46328e+07	5.29886e+07	7.60961e+07	6.99494e+07	7.3838e+07	7.35793e+07
Thr-Leu	231.135	439.158	Organic acids and derivatives	Carboxylic acids and derivatives	Amino acids, peptides, and analogues	3.02997e+07	2.81298e+07	2.81076e+07	2.294e+07	2.21691e+07	2.26802e+07	2.75921e+07	2.61438e+07	2.68739e+07	2.23979e+07	2.50032e+07	2.51009e+07	2.69032e+07	2.68989e+07	2.73385e+07
Thr-Val-Leu	330.204	370.256	Organic acids and derivatives	Carboxylic acids and derivatives	Amino acids, peptides, and analogues	4.0497e+06	2.2848e+06	1.13191e+06	1.17828e+06	3.77635e+06	963850	4.44962e+06	1.51256e+06	3.36948e+06	3.80288e+06	1.23953e+06	3.79264e+06	2.27063e+06	2.29586e+06	2.87375e+06
Thymol-beta-d-glucoside	311.17	41.7019	Lipids and lipid-like molecules	Prenol lipids	Terpene glycosides	4.91716e+07	4.7374e+07	2.84446e+07	3.39495e+07	2.82943e+07	3.10731e+07	6.17462e+07	3.1462e+07	4.75313e+07	2.25274e+07	2.52494e+07	2.28965e+07	4.44038e+07	4.55868e+07	4.55494e+07
Trans-2,3-dimethylacrylic acid	99.0075	678.563	Lipids and lipid-like molecules	Fatty Acyls	Fatty acids and conjugates	9.54989e+06	9.286e+06	1.02793e+07	9.47388e+06	1.01041e+07	9.47431e+06	9.6342e+06	1.10422e+07	9.57859e+06	9.68449e+06	9.26988e+06	1.06452e+07	9.85405e+06	9.85254e+06	9.74917e+06
Trans-dehydroandrosterone	287.223	122.383	Lipids and lipid-like molecules	Steroids and steroid derivatives	Androstane steroids	1.47888e+06	2.70701e+06	2.64525e+06	3.39352e+06	1.95e+06	1.75295e+06	785326	558919	1.40795e+06	663573	965550	1.44072e+06	1.83124e+06	1.6688e+06	2.0655e+06
Trans-ferulic acid	193.05	263.028	Phenylpropanoids and polyketides	Cinnamic acids and derivatives	Hydroxycinnamic acids and derivatives	5.2529e+08	3.91905e+08	3.4708e+08	3.16475e+08	3.32822e+08	4.3497e+08	4.28781e+08	5.5351e+08	4.25707e+08	2.72642e+08	3.61205e+08	4.78002e+08	4.71818e+08	4.73052e+08	5.01367e+08
Trifluoroacetic acid	226.997	298.478	Organic acids and derivatives	Carboxylic acids and derivatives	Alpha-halocarboxylic acids and derivatives	4.50411e+08	4.76968e+08	4.46182e+08	9.02765e+08	4.20271e+08	4.53071e+08	4.74411e+08	4.66694e+08	4.84182e+08	2.87282e+08	4.0045e+08	3.91342e+08	4.72679e+08	5.07245e+08	5.18937e+08
Udp-xylose	535.039	849.843	Nucleosides, nucleotides, and analogues	Pyrimidine nucleotides	Pyrimidine ribonucleotides	2.47065e+06	2.38321e+06	2.70005e+06	2.7386e+06	5.09354e+06	5.19724e+06	4.4699e+06	5.41912e+06	4.9304e+06	2.6363e+06	5.37783e+06	6.24808e+06	5.0457e+06	5.12027e+06	5.04819e+06
Undecanedioic acid	197.118	51.2022	Lipids and lipid-like molecules	Fatty Acyls	Fatty acids and conjugates	2.94513e+07	2.73633e+07	1.77606e+07	2.43608e+07	4.74398e+07	2.74022e+07	1.43189e+07	2.27003e+07	2.79261e+07	1.671e+07	2.95669e+07	1.78192e+07	3.25162e+07	3.05389e+07	2.99024e+07
Uric acid	124.039	269.44	Organoheterocyclic compounds	Imidazopyrimidines	Purines and purine derivatives	1.13335e+07	1.40737e+07	1.22243e+07	1.40978e+07	1.75207e+07	1.64357e+07	1.54063e+07	1.22343e+07	1.35589e+07	1.27194e+07	1.32463e+07	1.68991e+07	1.31622e+07	1.03566e+07	1.30128e+07
Uridine	243.063	269.556	"Nucleosides, nucleotides, and analogues"	Pyrimidine nucleosides		4.74659e+09	4.69799e+09	4.79554e+09	4.64006e+09	5.22544e+09	4.92929e+09	5.72771e+09	5.84766e+09	5.96397e+09	4.91439e+09	5.7739e+09	5.87243e+09	5.91111e+09	5.91222e+09	5.98425e+09
Uridine 5'-diphosphoglucose	565.05	852.721	Nucleosides, nucleotides, and analogues	Pyrimidine nucleotides	Pyrimidine nucleotide sugars	8.73861e+06	9.03929e+06	8.68061e+06	1.00793e+07	1.9395e+07	1.85731e+07	1.02919e+07	1.42964e+07	1.14782e+07	4.85904e+06	1.19826e+07	1.47406e+07	1.40428e+07	1.44147e+07	1.44158e+07
Uridine 5'-monophosphate	323.029	836.623	Nucleosides, nucleotides, and analogues	Pyrimidine nucleotides	Pyrimidine ribonucleotides	9.3189e+07	9.5881e+07	9.10373e+07	8.37691e+07	8.44403e+07	8.45727e+07	1.11632e+08	1.18623e+08	1.17268e+08	6.80682e+07	8.98174e+07	9.64459e+07	1.03766e+08	1.05321e+08	1.05297e+08
Urocanate	137.024	306.898	Organoheterocyclic compounds	Azoles	Imidazoles	9.40709e+06	1.01685e+07	8.58456e+06	8.65607e+06	8.15811e+06	8.21779e+06	9.613e+06	1.09298e+07	8.81177e+06	9.06491e+06	8.75936e+06	8.85582e+06	7.75618e+06	7.75854e+06	7.55864e+06
Val-Ala	187.109	464.738	Organic acids and derivatives	Carboxylic acids and derivatives	Amino acids, peptides, and analogues	2.64423e+07	2.34335e+07	2.59652e+07	2.21818e+07	1.2677e+07	1.2726e+07	2.516e+07	2.48918e+07	2.25252e+07	1.70667e+07	1.88585e+07	2.0618e+07	2.43704e+07	2.43467e+07	2.49719e+07
Val-Asp	231.099	716.15	Organic acids and derivatives	Carboxylic acids and derivatives	Amino acids, peptides, and analogues	3.67992e+06	3.28831e+06	3.7119e+06	3.14572e+06	2.95044e+06	4.01902e+06	3.79424e+06	4.37224e+06	4.175e+06	2.92157e+06	4.64664e+06	4.90765e+06	4.91323e+06	4.95493e+06	5.20085e+06
Valerenic acid	233.155	48.16	Lipids and lipid-like molecules	Prenol lipids	Sesquiterpenoids	5.47294e+06	3.68645e+06	2.99953e+06	3.1692e+06	3.20295e+06	4.6966e+06	4.08448e+06	3.19e+06	4.34446e+06	3.09194e+06	3.32596e+06	4.02372e+06	3.69154e+06	3.74336e+06	3.74201e+06
Val-Ser	203.103	520.484	Organic acids and derivatives	Carboxylic acids and derivatives	Amino acids, peptides, and analogues	5.85711e+07	6.11813e+07	5.85009e+07	5.24292e+07	5.89001e+07	4.69471e+07	4.5734e+07	4.4253e+07	4.9461e+07	4.3254e+07	4.49218e+07	5.34618e+07	5.76008e+07	5.76282e+07	5.84465e+07
Viscidulin i	301.058	116.035	Phenylpropanoids and polyketides	Flavonoids	Flavones	2.73112e+07	2.67406e+07	2.60636e+07	1.90786e+07	2.49599e+07	2.32166e+07	2.26452e+07	2.42231e+07	2.36178e+07	2.02168e+07	2.6435e+07	2.76992e+07	2.70831e+07	2.71067e+07	2.75767e+07
Vitamin c	175.024	87.2314	Organoheterocyclic compounds	Dihydrofurans	Furanones	1.68607e+08	1.66147e+08	1.44802e+08	1.09777e+08	1.31142e+08	1.01769e+08	2.48441e+08	2.54056e+08	2.55938e+08	1.34884e+08	1.45474e+08	1.5065e+08	1.67924e+08	1.70762e+08	1.67927e+08
Xanthine	151.026	373.446	Organoheterocyclic compounds	Imidazopyrimidines	Purines and purine derivatives	4.70917e+06	4.67532e+06	4.03274e+06	5.54262e+06	6.00998e+06	5.74894e+06	2.21124e+06	2.35198e+06	2.15542e+06	2.74532e+06	3.00395e+06	3.54225e+06	4.34261e+06	4.34306e+06	4.43571e+06
Xylitol	151.076	84.0875	Organic oxygen compounds	Organooxygen compounds	Carbohydrates and carbohydrate conjugates	5.39627e+06	5.06308e+06	4.68222e+06	3.77153e+06	3.90105e+06	3.41893e+06	9.01841e+06	9.94993e+06	9.18558e+06	4.28549e+06	4.82497e+06	4.83097e+06	5.56863e+06	5.56623e+06	5.47397e+06
(z)-2,6-dimethyl-7-(4-methyl-5-oxooxolan-2-yl)-3-[[3,4,5-trihydroxy-6-(hydroxymethyl)oxan-2-yl]oxymethyl]hept-5-enoic acid	445.21	258.743				1.1263e+08	1.14424e+08	1.14633e+08	1.3084e+08	9.95506e+07	8.77915e+07	1.16443e+08	1.21973e+08	1.0102e+08	1.32327e+08	1.50522e+08	1.22221e+08	1.12369e+08	1.07439e+08	1.0744e+08
Zinniol	265.149	37.406	Benzenoids	Benzene and substituted derivatives	Benzyl alcohols	5.36899e+07	5.83049e+07	6.5268e+07	8.00256e+07	1.65152e+08	6.48149e+07	1.5313e+08	1.14811e+08	1.36459e+08	3.45209e+07	3.76568e+07	4.09806e+07	8.79336e+07	8.79436e+07	8.8969e+07

## Sheet: Table S3
Table S3. List and characteristics of the identified different metabolites at 4 d and 8 d after soaking treatments with RA.
4 d																	8 d
Name	VIP	Fold change	p-value	m/z	rt(s)	KEGG	SuperClass	Class	SubClass	Control-4d-1	Control-4d-2	Control-4d-3	RA-4d-1	RA-4d-2	RA-4d-3		Name	VIP	Fold change	p-value	m/z	rt(s)	KEGG	SuperClass	Class	SubClass	Control-8d-1	Control-8d-2	Control-8d-3	RA-8d-1	RA-8d-2	RA-8d-3
Coumaroyl hexoside (isomer of 690, 691)	7.86473	0.868796	4.11e-05	325.094	229.605		Organic oxygen compounds	Organooxygen compounds	Carbohydrates and carbohydrate conjugates	2135158963	2177034321	2169033119	2502838196	2490958342	2466211200		4-morpholinopropanesulfonic acid	3.6465	310.864	1.56e-06	208.065	336.749		Organoheterocyclic compounds	Oxazinanes	Morpholines	6.77741e+07	7.31972e+07	6.98296e+07	169302	142912	365899
5,6,7,8-tetrahydro-2-Naphthoic Acid	1.0875	1.60586	5.82e-05	351.167	368.495					1.61662e+07	1.64923e+07	1.56592e+07	9.61227e+06	1.00336e+07	1.04426e+07		Vitamin c	4.26686	1.75967	2.95e-05	175.024	87.2314	C00072	Organoheterocyclic compounds	Dihydrofurans	Furanones	2.48441e+08	2.54056e+08	255938347	1.34884e+08	1.45474e+08	150650068
Taurine	4.61969	1.39891	0.000109144	124.006	530.798	C00245	Organic acids and derivatives	Organic sulfonic acids and derivatives	Organosulfonic acids and derivatives	3.8951e+08	3.83871e+08	382608243	270976155	2.8901e+08	266365499		2.alpha.-mannobiose	1.85714	1.79945	0.000353447	401.147	250.399		Organic oxygen compounds	Organooxygen compounds	Carbohydrates and carbohydrate conjugates	4.49301e+07	4.71901e+07	4.5815e+07	2.22245e+07	2.6703e+07	2.77265e+07
12(13)-epoxy-9z-octadecenoic acid	1.14027	0.823518	0.000206017	295.229	57.1173		Lipids and lipid-like molecules	Fatty Acyls	Fatty acids and conjugates	3.07346e+07	3.23781e+07	3.1051e+07	day	3.81693e+07	3.83072e+07		L-Carnosine	1.28232	2.79549	0.000845105	225.113	142.141	C00386	Organic acids and derivatives	Peptidomimetics	Hybrid peptides	1.41789e+07	1.31874e+07	1.63294e+07	5.08521e+06	6.08032e+06	4.46529e+06
N,n-dicarbobenzyloxy-l-ornithine	2.14176	6.9142	0.000216427	183.033	54.7956		Benzenoids	Benzene and substituted derivatives	Benzyloxycarbonyls	2.41965e+07	2.98389e+07	2.95984e+07	3.83943e+06	3.63066e+06	4.62586e+06		Zinniol	4.15236	3.57376	0.000991052	265.149	37.406	C10840	Benzenoids	Benzene and substituted derivatives	Benzyl alcohols	1.5313e+08	1.14811e+08	1.36459e+08	3.45209e+07	3.76568e+07	4.09806e+07
6-formylpterin	1.68472	1.31609	0.000374479	190.051	525.619		Organoheterocyclic compounds	Pteridines and derivatives	Pterins and derivatives	6.18535e+07	6.1403e+07	6.17575e+07	4.81377e+07	4.82348e+07	4.42058e+07		N-acetylneuraminic acid	1.50057	1.37072	0.00105327	290.089	681.483	C00270	Organic oxygen compounds	Organooxygen compounds	Carbohydrates and carbohydrate conjugates	6.19846e+07	6.64155e+07	6.31027e+07	4.95842e+07	4.45446e+07	4.55809e+07
N-acetylneuraminic acid	1.86336	1.64965	0.000402994	290.089	681.483	C00270	Organic oxygen compounds	Organooxygen compounds	Carbohydrates and carbohydrate conjugates	4.43939e+07	4.84471e+07	4.5152e+07	3.00754e+07	2.70024e+07	2.65719e+07		Adenosine 5-phosphosulfate	1.63408	1.7154	0.00106815	444.025	813.701	C00224	Nucleosides, nucleotides, and analogues	Purine nucleotides	Purine ribonucleotides	3.74471e+07	4.11874e+07	3.75197e+07	1.969e+07	2.43598e+07	2.36627e+07
Doxorubicin	1.28703	4.86035	0.000427281	395.065	750.765	C01661				1.10675e+07	1.01021e+07	1.11486e+07	1.4534e+06	3.66161e+06	1.53434e+06		2-hydroxy-4-methoxyacetophenone	1.14017	0.73405	0.00110599	165.055	55.5406	C10712	Organic oxygen compounds	Organooxygen compounds	Carbonyl compounds	1.38581e+07	1.48275e+07	1.44787e+07	2.02808e+07	2.0017e+07	1.85052e+07
Pantothenate	2.8416	0.485166	0.000437183	218.103	468.264	C00864	Organic oxygen compounds	Organooxygen compounds	Alcohols and polyols	4.04351e+07	3.91582e+07	3.84495e+07	8.55026e+07	7.33863e+07	8.4415e+07		3-hydroxy-3-methylglutaric acid	2.94392	1.49415	0.00139851	161.045	677.499	C03761	Lipids and lipid-like molecules	Fatty Acyls	Fatty acids and conjugates	1.64143e+08	1.75628e+08	173797013	1.04263e+08	1.13658e+08	1.25799e+08
Sinefungin	1.36906	1.24022	0.000614256	380.157	650.148					5.11975e+07	4.98665e+07	4.8453e+07	3.90359e+07	4.05317e+07	4.09891e+07		(10e,15z)-9,12,13-trihydroxyoctadeca-10,15-dienoic acid	3.44171	0.418923	0.00157606	327.219	251.495		Lipids and lipid-like molecules	Fatty Acyls	Lineolic acids and derivatives	4.43629e+07	3.41086e+07	3.99377e+07	9.58751e+07	8.21852e+07	1.04591e+08
Myristic acid	1.53003	2.35284	0.000985472	227.202	77.6219	C06424	Lipids and lipid-like molecules	Fatty Acyls	Fatty acids and conjugates	2.0122e+07	2.41988e+07	1.98855e+07	8.77278e+06	9.60819e+06	8.90786e+06		Ketoleucine	2.51704	0.651324	0.00217753	129.055	75.3882	C00233	Organic acids and derivatives	Keto acids and derivatives	Short-chain keto acids and derivatives	5.22858e+07	5.02826e+07	48602287	7.86386e+07	7.04225e+07	8.30365e+07
Naringenin chalcone	1.02156	5.29693	0.00103659	271.061	82.0791	C06561	Phenylpropanoids and polyketides	Linear 1,3-diarylpropanoids	Chalcones and dihydrochalcones	7.31735e+06	7.43159e+06	5.50778e+06	1.06643e+06	1.57834e+06	1.17946e+06		Doxorubicin	2.38368	3.65523	0.00220732	395.065	750.765	C01661				5.21651e+07	4.07191e+07	3.95273e+07	8.29928e+06	1.20171e+07	1.59089e+07
L-(+)-lactic acid	1.61138	0.740613	0.00113117	89.0232	384.578	C00186	Organic acids and derivatives	Hydroxy acids and derivatives	Alpha hydroxy acids and derivatives	3.73598e+07	3.99731e+07	3.96836e+07	5.15312e+07	5.54782e+07	5.09901e+07		Caffeic acid	1.21561	1.55507	0.00323336	179.035	636.009	C01481	Phenylpropanoids and polyketides	Cinnamic acids and derivatives	Hydroxycinnamic acids and derivatives	24949125	2.72597e+07	2.65547e+07	1.44291e+07	1.72695e+07	1.89509e+07
Thr-Leu	1.09341	1.27656	0.00120119	231.135	439.158		Organic acids and derivatives	Carboxylic acids and derivatives	Amino acids, peptides, and analogues	3.02997e+07	2.81298e+07	2.81076e+07	2.294e+07	2.21691e+07	2.26802e+07		1,3-Dicaffeoylquinic acid	1.06636	4.14187	0.00351889	515.121	295.004					9.20479e+06	9.97984e+06	6.74155e+06	2.81227e+06	2.09829e+06	1.34897e+06
Indole	1.97398	0.828504	0.00138206	116.071	535.697	C00463	Organoheterocyclic compounds	Indoles and derivatives	Indoles	9.6125e+07	1.02272e+08	9.37127e+07	1.17531e+08	1.17545e+08	117498202		5-hydroxylysine	1.87433	1.8377	0.00361538	161.081	294.182	C16741	Organic acids and derivatives	Carboxylic acids and derivatives	Amino acids, peptides, and analogues	4.25112e+07	48163368	4.6754e+07	1.90069e+07	2.78072e+07	2.79687e+07
.gamma.-hydroxybutyric acid	1.02031	0.526436	0.00186845	103.039	430.524	C00989	Lipids and lipid-like molecules	Fatty Acyls	Fatty acids and conjugates	6.37779e+06	6.76856e+06	4.96934e+06	1.07961e+07	12457867	1.1158e+07		5,6,7,8-tetrahydro-2-Naphthoic Acid	1.60403	1.73612	0.00397493	351.167	368.495					3.4198e+07	3.89011e+07	3.69064e+07	1.67521e+07	2.2586e+07	2.40246e+07
Quinate	4.50266	1.09166	0.00213093	191.056	614.837	C00296	Organic oxygen compounds	Organooxygen compounds	Alcohols and polyols	1276950813	1257050002	1233969857	1137134884	1165796372	1148676905		Bisphenol af	4.14068	2.28379	0.00519579	335.044	763.145	C14350	Benzenoids	Benzene and substituted derivatives	Diphenylmethanes	1.67927e+08	1.91758e+08	1.68871e+08	5.17602e+07	7.26963e+07	1.06982e+08
Resorcinol	1.35965	0.81683	0.00219903	109.04	681.514	C01751	Benzenoids	Phenols	Benzenediols	4.25971e+07	4.39134e+07	4.22317e+07	5.50042e+07	5.18809e+07	5.07269e+07		Purine	1.43866	1.28857	0.005229	119.049	595.831	C15587	Organoheterocyclic compounds	Imidazopyrimidines	Purines and purine derivatives	7.02781e+07	7.69194e+07	7.45747e+07	5.33153e+07	5.75981e+07	6.11934e+07
Glutamic acid	13.3255	1.29034	0.00223158	146.045	743.417	C00025	Organic acids and derivatives	Carboxylic acids and derivatives	Amino acids, peptides, and analogues	4239862207	4159137259	3884339448	3021462858	3227414660	3270598183		Curcumin	4.17539	1.34655	0.00533376	367.106	530.688	C10443	Phenylpropanoids and polyketides	Diarylheptanoids	Linear diarylheptanoids	5.68801e+08	5.98093e+08	539621895	4.1987e+08	4.59324e+08	3.88133e+08
Curculigoside	3.08075	1.87022	0.00255439	283.083	148.976		Organic oxygen compounds	Organooxygen compounds	Carbohydrates and carbohydrate conjugates	1.07646e+08	1.052e+08	1.02264e+08	4.19526e+07	6.3171e+07	6.33644e+07		D-2-aminobutyric acid	6.39914	1.37506	0.00534147	102.055	743.356	C02261	Organic acids and derivatives	Carboxylic acids and derivatives	Amino acids, peptides, and analogues	1009221526	1104523893	1036670825	6.76219e+08	8.06697e+08	8.08204e+08
Thelephoric acid	1.74075	1.81857	0.0025898	351.003	754.909					3.67702e+07	3.6912e+07	3.19637e+07	1.60779e+07	2.01222e+07	2.18927e+07		Myristic acid	1.21253	1.89578	0.00600303	227.202	77.6219	C06424	Lipids and lipid-like molecules	Fatty Acyls	Fatty acids and conjugates	2.1789e+07	1.6445e+07	2.08646e+07	1.15539e+07	9.91238e+06	9.70748e+06
Leu-Ser	1.16474	1.31257	0.00261279	217.119	476.743		Organic acids and derivatives	Carboxylic acids and derivatives	Amino acids, peptides, and analogues	3.06604e+07	2.96561e+07	3.28048e+07	2.3771e+07	2.4625e+07	2.25497e+07		Allyl isothiocyanate	2.24453	1.43458	0.0104475	98.0235	322.202	C19317				1.29451e+08	1.26436e+08	1.26354e+08	1.009e+08	7.25952e+07	9.29532e+07
Fa 13:3+1o	1.22162	1.87971	0.00265634	223.134	95.9646		Lipids and lipid-like molecules	Fatty Acyls	Fatty acids and conjugates	1.77584e+07	1.80049e+07	1.48112e+07	1.01399e+07	8.57487e+06	8.1907e+06		Indole	3.30247	0.622751	0.0109508	116.071	535.697	C00463	Organoheterocyclic compounds	Indoles and derivatives	Indoles	7.61198e+07	7.8304e+07	7.79879e+07	1.04604e+08	1.28536e+08	1.40061e+08
Uridine 5-monophosphate	1.31347	1.1081	0.00305991	323.029	836.623	C00105	Nucleosides, nucleotides, and analogues	Pyrimidine nucleotides	Pyrimidine ribonucleotides	9.3189e+07	9.5881e+07	9.10373e+07	8.37691e+07	8.44403e+07	8.45727e+07		1-aminocyclopropanecarboxylic acid	1.15835	1.47356	0.0112973	100.039	733.702	C01234	Organic acids and derivatives	Carboxylic acids and derivatives	Amino acids, peptides, and analogues	2.73938e+07	2.96355e+07	2.61444e+07	1.57247e+07	1.90303e+07	2.16893e+07
Picolinic acid	1.12568	1.6737	0.0031399	122.036	75.4883	C10164	Organoheterocyclic compounds	Pyridines and derivatives	Pyridinecarboxylic acids and derivatives	1.64371e+07	1.86193e+07	1.51939e+07	9.52174e+06	1.06886e+07	9.81314e+06		Blood group h disaccharide	1.30455	3.19566	0.0113528	371.136	241.084		Organic oxygen compounds	Organooxygen compounds	Carbohydrates and carbohydrate conjugates	1.86366e+07	1.08477e+07	1.55846e+07	5.29154e+06	5.15688e+06	3.65475e+06
Lithosprmoside	1.24658	0.548043	0.00341173	328.108	507.643		Organic oxygen compounds	Organooxygen compounds	Carbohydrates and carbohydrate conjugates	1.00701e+07	1.02567e+07	9.01924e+06	1.54218e+07	1.86257e+07	1.94996e+07		Lithosprmoside	1.70333	0.502722	0.0116105	328.108	507.643		Organic oxygen compounds	Organooxygen compounds	Carbohydrates and carbohydrate conjugates	1.292e+07	1.43231e+07	1.26803e+07	2.07137e+07	2.83057e+07	3.03952e+07
L-gulonolactone	3.85607	1.14507	0.0040951	177.04	168.92	C01040	Organoheterocyclic compounds	Lactones	Gamma butyrolactones	6.27299e+08	6.33725e+08	6.50567e+08	533109104	570490095	5.65807e+08		Arbutin	1.50061	0.798181	0.012255	271.083	260.652	C06186	Organic oxygen compounds	Organooxygen compounds	Carbohydrates and carbohydrate conjugates	3.17372e+07	3.27263e+07	3.26128e+07	3.69344e+07	4.15584e+07	4.3129e+07
D-2-aminobutyric acid	5.16299	1.26711	0.00417652	102.055	743.356	C02261	Organic acids and derivatives	Carboxylic acids and derivatives	Amino acids, peptides, and analogues	7.03618e+08	670955640	634524719	5.10229e+08	5.20857e+08	5.54488e+08		21-hydroxyprogesterone	2.95925	0.55608	0.0132728	329.234	243.952	C03205	Lipids and lipid-like molecules	Steroids and steroid derivatives	Hydroxysteroids	5.78048e+07	4.22604e+07	5.1683e+07	8.37447e+07	8.14642e+07	1.0768e+08
6:3+6o fatty acyl hexoside	1.74911	1.32575	0.00478431	353.074	824.439		Lipids and lipid-like molecules	Fatty Acyls	Fatty acyl glycosides	6.6272e+07	6.83993e+07	6.27872e+07	5.43157e+07	4.7057e+07	4.75684e+07		D-gluconate	1.47771	0.834666	0.0148164	195.051	742.408	C00257	Organic oxygen compounds	Organooxygen compounds	Carbohydrates and carbohydrate conjugates	3.60593e+07	3.88692e+07	4.09681e+07	4.44853e+07	4.85775e+07	4.57911e+07
Camelliaside b	1.19071	1.49258	0.00512069	725.196	524.772		Phenylpropanoids and polyketides	Flavonoids	Flavonoid glycosides	2.33e+07	2.32213e+07	2.20279e+07	1.4315e+07	1.78717e+07	1.374e+07		Allantoin	7.62573	0.800041	0.0161302	157.036	315.725	C01551	Organoheterocyclic compounds	Azoles	Imidazoles	8.27251e+08	857274961	8.49054e+08	9.6043e+08	1066865230	1139516447
Ala-Leu	1.02385	1.32415	0.0052933	201.124	461.897		Organic acids and derivatives	Carboxylic acids and derivatives	Amino acids, peptides, and analogues	2.48792e+07	2.22129e+07	2.18554e+07	1.74416e+07	1.66877e+07	1.794e+07		Glutamic acid	14.8042	1.3357	0.0168797	146.045	743.417	C00025	Organic acids and derivatives	Carboxylic acids and derivatives	Amino acids, peptides, and analogues	6082618140	6596565579	6333251804	3994248450	5141183155	5098651216
Bisphenol af	2.93838	2.58778	0.00568382	335.044	763.145	C14350	Benzenoids	Benzene and substituted derivatives	Diphenylmethanes	6.57432e+07	9.22124e+07	7.40256e+07	3.64952e+07	22667466	3.04823e+07		Isomaltose	3.20771	1.66041	0.0169341	341.089	635.98	C05400	Organic oxygen compounds	Organooxygen compounds	Carbohydrates and carbohydrate conjugates	2.07022e+08	166279991	1.58806e+08	8.90554e+07	1.08586e+08	1.22828e+08
Leu-Leu	1.40983	1.4377	0.0069484	243.172	315.724		Organic acids and derivatives	Carboxylic acids and derivatives	Amino acids, peptides, and analogues	3.69458e+07	3.25977e+07	3.85115e+07	2.58322e+07	2.66596e+07	2.26662e+07		5-methylbenzotriazole	2.25945	3.29344	0.0178545	132.048	188.773	C06473				5.97437e+07	3.48247e+07	4.23205e+07	2.05993e+07	8.55336e+06	1.24114e+07
(10e,15z)-9,12,13-trihydroxyoctadeca-10,15-dienoic acid	2.24475	0.538032	0.00751136	327.219	251.495		Lipids and lipid-like molecules	Fatty Acyls	Lineolic acids and derivatives	2.78799e+07	3.46629e+07	2.99041e+07	6.69296e+07	5.38977e+07	5.09968e+07		Pyridoxamine	1.16314	1.76613	0.018175	167.071	306.853	C00534	Organoheterocyclic compounds	Pyridines and derivatives	Pyridoxamines	2.29182e+07	1.67238e+07	2.42356e+07	1.219e+07	1.09444e+07	1.30338e+07
Ser-Phe	1.04535	1.2473	0.00765761	251.104	440.973		Organic acids and derivatives	Carboxylic acids and derivatives	Amino acids, peptides, and analogues	3.03334e+07	2.92972e+07	2.75939e+07	2.2191e+07	24958434	2.27814e+07		Iminodiacetic acid	3.46603	0.798653	0.0184309	114.03	315.725	C19911	Organic acids and derivatives	Carboxylic acids and derivatives	Amino acids, peptides, and analogues	1.70369e+08	1.79852e+08	1.72157e+08	1.99202e+08	2.17406e+08	2.37465e+08
Dl-malic acid	11.3317	0.833384	0.00770064	133.013	755.982	C00497	Organic acids and derivatives	Hydroxy acids and derivatives	Beta hydroxy acids and derivatives	3463712467	3398701612	3149434330	3822841279	4139970499	4050677396		1h-indole-6-carboxamide, n-hydroxy-1-[(4-methoxyphenyl)methyl]-	1.73851	0.770609	0.0210245	189.088	679.543		Organoheterocyclic compounds	Indoles and derivatives	Indolecarboxylic acids and derivatives	3.72304e+07	3.97167e+07	3.88338e+07	4.40857e+07	5.23531e+07	5.38073e+07
Ile-Phe	1.77455	1.30441	0.00811728	277.156	294.182		Organic acids and derivatives	Carboxylic acids and derivatives	Amino acids, peptides, and analogues	7.40512e+07	7.38705e+07	7.51762e+07	5.98074e+07	6.12225e+07	5.00042e+07		D-aspartic acid	2.89622	1.22718	0.0215832	132.029	753.106	C00402	Organic acids and derivatives	Carboxylic acids and derivatives	Amino acids, peptides, and analogues	4.10221e+08	4.51187e+08	4.54682e+08	3.24627e+08	3.664e+08	3.81422e+08
1,4-d-xylobiose	6.32698	0.834245	0.00884045	317.056	684.498	C01630	Organic oxygen compounds	Organooxygen compounds	Carbohydrates and carbohydrate conjugates	1106211201	1062545990	9.96459e+08	1205663890	1305485426	1282956882		Dodecanoic acid	1.01443	2.31925	0.0223389	199.17	79.0147	C02679	Lipids and lipid-like molecules	Fatty Acyls	Fatty acids and conjugates	1.55454e+07	9.25496e+06	1.11773e+07	5.05669e+06	5.72534e+06	4.73063e+06
1-palmitoyl-2-linoleoyl-sn-glycero-3-phospho-(1-rac-glycerol)	2.01763	1.68449	0.00935992	745.505	106.618		Lipids and lipid-like molecules	Glycerophospholipids	Glycerophosphoglycerols	5.52845e+07	5.64539e+07	4.86122e+07	3.92632e+07	2.60104e+07	2.99189e+07		Isoleucine	5.77001	0.770449	0.0242972	130.086	487.617	C00407	Organic acids and derivatives	Carboxylic acids and derivatives	Amino acids, peptides, and analogues	4.18954e+08	4.26033e+08	4.33551e+08	484275642	570961896	6.04232e+08
Cytidine	1.59035	1.0873	0.0105049	242.079	420.255	C00475	Nucleosides, nucleotides, and analogues	Pyrimidine nucleosides		1.67518e+08	1.67136e+08	1.59006e+08	1.49611e+08	1.51975e+08	1.52439e+08		Uridine 5-monophosphate	2.09007	1.36642	0.0245297	323.029	836.623	C00105	Nucleosides, nucleotides, and analogues	Pyrimidine nucleotides	Pyrimidine ribonucleotides	1.11632e+08	1.18623e+08	1.17268e+08	6.80682e+07	8.98174e+07	9.64459e+07
Physcion	1.03809	1.58546	0.0108125	283.079	484.197	C17045	Benzenoids	Anthracenes	Anthraquinones	1.72346e+07	1.62368e+07	1.48723e+07	8.94777e+06	9.12068e+06	1.24235e+07		P-hydroxy-cinnamic acid	2.18697	1.2363	0.0269759	163.039	595.809	C00811	Organic oxygen compounds	Organooxygen compounds	Carbohydrates and carbohydrate conjugates	2.13449e+08	2.19925e+08	2.23017e+08	1.53338e+08	1.86018e+08	1.91575e+08
Propanoic acid	1.46177	0.769997	0.0110519	72.9918	452.707	C00163	Organic acids and derivatives	Carboxylic acids and derivatives	Carboxylic acids	3.66376e+07	4.3777e+07	3.68036e+07	5.17756e+07	5.19677e+07	4.84888e+07		DL-serine	2.17912	0.711196	0.0283893	104.034	685.492	C00065	Organic acids and derivatives	Carboxylic acids and derivatives	Amino acids, peptides, and analogues	4.69583e+07	4.85532e+07	4.77932e+07	5.58178e+07	7.1121e+07	7.45595e+07
[truncated: 158 more rows]

## Sheet: Table S4
Table S4. Enriched KEGG pathway at 4 d and 8 d after soaking treatments with RA.
4 d
[truncated: 26 more rows]

## Sheet: Table S5
Table S5. Metabolites in ABC transporters, biosynthesis of Amino acid and Aminoacyl-tRNA biosynthesis KEGG pathway at 4 d and 8 d after soaking treatments with RA.
[truncated: 29 more rows]
